# Supplementary material for: Temporally resolved early bone morphogenetic protein-driven transcriptional cascade during human amnion specification
Source: eLife. 2024 Jul 25;12:RP89367. doi: 10.7554/eLife.89367 (PMC11272160; doi:10.7554/eLife.89367)
Supplement: Supplementary file 1. — (A) Normalized and filtered count matrix of the time-course bulk-RNA sequencing. (B–C) Gene expression comparison analysis between 48 hr (d4) Glass-3D+BMP hPSC-amnion and d4 Glass-3D hPSC-cysts: lists of 1813 upregulated (B) and 2088 down- (C) regulated genes. (D–E) Gene Ontology analyses (Biological Processes) for top all significantly up- (D) and down- (E) regulated genes. [file elife-89367-supp1.xlsx]

## Sheet: A - filtered count matrix
gene_id	gene_name	monolayer	monolayer	monolayer	pluripotent-cyst d4	pluripotent-cyst d4	pluripotent-cyst d4	0-hr	0-hr	0-hr	0.5-hr	0.5-hr	0.5-hr	1-hr	1-hr	1-hr	3-hr	3-hr	3-hr	6-hr	6-hr	6-hr	12-hr	12-hr	12-hr	24-hr	24-hr	24-hr	48-hr	48-hr	48-hr
ENSG00000000003	TSPAN6	463.661	526.88	435.452	484.557	542.553	450.15	704.963	680.026	675.873	720.547	674.436	663.882	695.793	652.051	674.917	759.097	725.916	792.222	704.946	719.734	768.173	707.744	647.717	728.171	588.521	587.618	593.077	770.02	752.665	707.117
ENSG00000000005	TNMD	6.76329	4.44625	5.42052	9.99087	8.79452	7.04933	6.82536	12.4585	9.48966	10.7705	15.1346	14.277	22.3207	10.4101	9.88886	14.7876	18.3114	21.1135	20.9578	17.507	19.9373	12.8098	13.5885	9.82537	4.12273	3.84063	3.4169	1.00394	2.41755	1.16686
ENSG00000000419	DPM1	313.803	326.799	264.391	316.327	297.903	270.575	322.744	174.419	417.706	370.649	389.139	327.678	371.053	288.574	358.786	401.24	392.387	348.901	305.811	292.681	237.051	342.908	95.1544	123.363	339.862	368.558	337.811	323.27	330.125	267.608
ENSG00000000457	SCYL3	55.9205	68.2854	69.8892	61.1248	66.5718	69.8027	50.1511	37.2117	33.8546	28.4881	31.2296	33.7283	41.0483	56.7221	49.8851	48.1287	50.6643	44.6355	49.3422	50.2461	45.4575	63.0071	33.435	49.2812	66.7349	74.949	73.2429	149.535	134.146	147.823
ENSG00000000460	C1orf112	160.505	169.589	146.931	167.666	173.586	164.839	195.562	194.309	201.278	191.23	188.222	161.688	178.31	182.711	170.142	153.969	159.916	166.5	187.862	195.824	187.926	243.361	248.903	258.581	270.298	287.031	275.281	202.849	199.475	167.229
ENSG00000001036	FUCA2	285.854	274.849	273.596	273.966	293.935	332.385	318.581	322.711	273.939	282.958	262.774	272.654	277.717	283.042	276.089	323.678	267.733	305.538	278.777	269.002	293.517	229.113	316.4	296.779	252.959	284.61	257.346	272.565	241.836	236.592
ENSG00000001084	GCLC	255.408	268.893	237.361	263.499	289.447	282.612	362.408	319.605	405.463	418.188	433.947	413.572	442.287	382.97	460.867	391.116	358.059	374.275	315.96	331.625	324.416	283.712	161.29	194.212	228.756	203.344	209.638	152.559	148.107	158.363
ENSG00000001167	NFYA	169.007	222.313	197.757	228.761	219.187	205.402	375.395	374.793	409.11	334.934	323.014	313.186	316.338	334.995	331.089	410.947	440.61	369.028	424.791	423.991	416.337	380.867	345.751	351.482	389.538	339.896	387.053	493.884	459.279	493.545
ENSG00000001460	STPG1	62.3725	73.3631	62.7956	75.9306	64.2677	66.4651	31.2017	29.0699	25.3058	16.1557	29.3232	23.2001	20.0116	17.0347	22.2499	19.7168	13.0795	25.7034	24.7684	20.4248	35.1834	29.8896	27.1769	19.6508	22.675	24.004	21.4777	20.0789	20.9521	18.6698
ENSG00000001461	NIPAL3	60.1182	62.2475	60.5212	42.9608	51.4141	59.4158	47.7775	43.6048	50.6115	42.0049	47.2955	47.2924	70.8104	52.0506	49.4443	84.7824	60.1659	76.1924	57.1577	66.1374	49.2568	46.9694	40.7654	49.1269	31.9511	22.0836	20.9895	24.0946	24.9813	19.8366
ENSG00000001497	LAS1L	383.253	384.601	390.278	415.62	393.048	407.854	357.844	416.322	314.213	333.886	349.987	368.524	334.81	362.462	332.513	374.62	345.3	395.649	405.82	447.4	437.447	359.743	520.892	489.085	293.744	310.131	284.091	243.958	238.531	273.046
ENSG00000001561	ENPP4	102.201	104.487	88.9868	84.9224	100.122	88.6202	47.7775	18.6878	83.2981	70.0082	64.3219	64.2464	54.6472	52.0506	51.9165	44.3629	47.0864	48.6529	49.5367	33.0687	35.1834	74.724	13.5885	14.1922	83.4852	104.657	98.1138	66.2602	66.0796	57.1762
ENSG00000001617	SEMA3F	116.479	155.619	152.678	151.861	154.919	120.846	145.283	168.19	146.562	127.092	107.834	147.231	122.379	123.029	105.069	139.004	124.256	154.221	135.273	114.768	151.289	145.178	227.984	175.765	150.479	163.227	177.679	215.848	229.667	240.373
ENSG00000001626	CFTR	7.51477	6.66938	12.1962	3.99635	6.76502	7.04933	2.92516	6.22926	8.43525	12.9246	6.62137	5.35386	3.84839	4.73187	4.94443	3.94337	2.61591	5.50788	0.952629	0.972609	2.34556	3.20246	0	1.09171	3.09204	9.60159	5.85754	8.03154	7.25264	5.83431
ENSG00000001629	ANKIB1	447.128	571.343	418.736	466.573	434.315	379.657	394.896	212.833	479.755	426.511	418.093	431.879	424.863	414.512	440.055	365.747	398.926	386.47	339.136	330.687	326.033	415.252	110.218	191.049	508.126	475.278	499.844	529.077	497.953	472.579
ENSG00000001630	CYP51A1	516.187	566.176	529.088	608.018	716.935	581.563	1007.3	1020.36	1022.35	960.151	960.865	918.692	982.404	860.879	943.47	1066.75	1085.99	1116.11	1225.1	1201.11	1274.64	874.593	780.04	894.392	985.496	910.693	1019.36	732.677	707.605	799.096
ENSG00000001631	KRIT1	175.279	222.457	179.609	225.549	195.035	178.09	155.129	89.6213	197.79	176.191	199.184	191.393	176.509	160.603	191.805	201.225	191.386	141.598	180.084	146.25	142.361	191.461	36.4545	84.1576	231.411	203.191	213.186	208.921	228.946	249.542
ENSG00000002016	RAD52	61.6728	62.2475	56.9154	56.948	53.4436	53.3927	40.9522	40.4902	35.8576	47.5125	35.9446	41.0463	48.4902	30.6308	38.3193	61.1222	41.8545	52.3249	41.9157	52.5209	49.6652	38.4295	40.7654	43.6683	42.2579	41.3375	38.0814	57.2247	47.5451	49.0082
ENSG00000002330	BAD	63.8724	44.4625	73.4714	51.216	50.7376	80.1638	62.4033	72.471	61.1556	57.3421	59.119	57.8091	52.9804	53.5364	48.9773	48.9175	44.0208	67.3321	52.6873	56.3719	51.1003	52.7175	70.3642	74.7908	60.5307	60.5029	69.091	58.3351	52.4483	83.5925
ENSG00000002549	LAP3	160.633	215.643	168.395	167.624	205.232	186.085	262.081	252.025	250.798	241.334	223.008	251.397	250.089	214.759	233.748	230.573	249.41	272.495	232.2	236.467	251.923	212.287	232.272	249.871	196.733	220.742	213.801	201.694	225.458	171.034
ENSG00000002586	CD99	93.9346	77.8094	96.6658	91.916	113.652	91.6413	115.056	124.585	97.0054	90.4722	70.9433	84.7695	113.912	119.243	98.8886	81.8249	90.2489	110.158	85.7366	76.8361	98.5135	104.614	116.257	129.913	166.97	118.099	150.832	695.732	657.573	668.611
ENSG00000002587	HS3ST1	12.0236	11.1156	16.2615	6.99361	5.41201	12.0846	9.75052	5.19105	7.38085	5.38525	3.78364	6.24617	5.38775	4.73187	12.3611	15.7735	9.15568	17.4416	16.1947	12.6439	18.7645	21.3497	13.5885	25.1093	27.8284	23.0438	16.5964	16.0631	16.117	9.33489
ENSG00000002746	HECW1	27.8046	22.2313	28.4577	11.989	16.9125	9.06343	18.526	18.6878	18.9793	20.4639	23.6478	19.6308	23.0904	19.8739	22.2499	24.646	5.23182	14.6877	20.9578	14.5891	5.8639	5.33743	6.03932	4.36683	3.09204	2.88048	3.4169	0	0	0
ENSG00000002822	MAD1L1	120.072	146.701	105.867	85.8462	93.6821	104.564	65.1897	88.0035	70.1354	83.0901	78.109	90.0491	74.4113	81.2987	71.4291	71.8809	57.3472	78.3956	59.8064	71.8988	65.4189	60.4094	100.923	83.4515	86.7344	88.4267	97.1854	102.365	95.0305	92.8639
ENSG00000002834	LASP1	958.132	729.187	897.548	744.322	805.709	820.748	946.768	1130.61	824.546	869.174	926.041	934.255	947.468	969.093	887.529	948.371	776.927	910.642	960.256	939.542	1007.41	1004.51	1360.35	1257.64	1153.34	1236.68	1181.27	1135.45	1093.52	1208.86
ENSG00000002919	SNX11	87.9228	71.14	87.18	81.9252	94.0337	92.6483	68.2536	79.9421	51.6659	72.1623	65.2678	75.8464	53.1078	54.8898	69.222	78.8674	56.242	69.7665	72.3998	54.4661	85.6129	66.1841	90.5898	61.1357	60.8102	53.7689	57.1111	65.2563	43.5158	53.6756
ENSG00000003056	M6PR	662.02	566.865	654.433	554.137	554.796	591.701	763.162	846.61	697.411	800.412	691.705	667.192	687.342	700.866	721.727	760.867	743.6	791.187	779.412	832.132	793.324	776.724	945.954	927.184	812.744	766.278	747.931	739.36	744.075	732.328
ENSG00000003096	KLHL13	93.9346	100.041	109.314	83.9234	90.6512	82.5779	114.081	101.745	124.42	99.0886	122.023	86.5541	103.907	96.5302	107.541	74.924	82.4012	88.1261	60.0156	65.1648	63.3301	62.9817	22.6475	41.4849	45.35	48.0079	52.7179	38.1498	35.4573	39.6733
ENSG00000003147	ICA1	130.006	122.272	118.8	96.9115	110.946	141.994	94.58	104.859	97.0054	72.1623	111.617	81.2003	80.8163	78.5491	96.4163	90.6975	74.5534	79.8643	60.9683	78.7813	65.6757	50.1718	69.4522	54.5854	21.6443	35.5259	39.0503	16.0631	24.9813	12.8355
ENSG00000003249	DBNDD1	94.6861	97.8175	117.445	92.9152	99.4456	96.6766	120.906	110.05	97.0054	79.7017	85.132	91.9079	75.4285	89.9057	110.013	60.1364	77.1693	67.9306	37.1525	50.5757	36.3562	35.227	36.2359	56.7688	17.5216	37.4462	26.8471	11.0434	22.5638	19.8366
ENSG00000003393	ALS2	404.294	411.278	438.159	442.596	433.638	441.087	356.869	386.214	396.457	358.658	370.797	349.786	356.361	372.872	331.277	304.625	307.369	291.918	331.515	337.495	349.488	360.81	303.476	314.412	356.616	369.661	335.832	478.881	473.839	522.754
ENSG00000003400	CASP10	17.284	28.9006	21.2304	14.9863	18.2655	19.1339	9.75052	19.726	22.1425	8.6164	12.2968	11.6	9.23614	12.3029	9.88886	11.8301	11.7716	9.1798	5.71577	13.6165	12.9006	12.8098	6.03932	14.1922	20.6136	19.2032	22.942	23.0907	23.3696	17.5029
ENSG00000003402	CFLAR	75.7886	68.9169	83.0401	68.937	76.6556	86.0793	57.7923	39.0346	37.7554	41.7091	46.1827	46.5759	57.8027	58.5738	70.3488	41.0019	42.2365	51.3177	45.5909	67.11	66.8485	73.5531	67.2638	62.2274	74.2091	79.5557	71.8602	180.106	155.743	192.037
ENSG00000003436	TFPI	9.86053	8.8925	14.4556	25.9763	23.6776	24.1691	9.75052	6.22926	13.7073	23.6951	19.8642	14.277	19.242	23.6594	19.1025	14.7876	22.2352	12.8517	19.0526	15.5617	15.2461	17.0798	4.52949	5.45854	62.8716	43.2071	53.206	123.485	138.606	94.5157
ENSG00000003509	NDUFAF7	334.389	282.519	304.884	235.352	241.645	292.76	284.892	216.508	278.549	281.973	276.142	280.988	233.844	218.12	259.953	222.123	203.491	208.925	172.826	201.816	192.023	182.886	106.398	154.159	108.255	114.439	117.791	158.681	146.462	141.561
ENSG00000003756	RBM5	469.935	444.312	445.981	463.061	443.053	470.36	372.175	371.749	298.288	323.856	337.182	370.105	380.326	428.112	362.358	381.793	420.926	398.569	422.187	502.353	476.061	410.991	430.457	417.916	497.62	480.19	490.123	997.648	922.826	945.579
ENSG00000003987	MTMR7	132.082	134.722	100.143	84.7354	90.4251	105.281	58.0461	33.8199	86.8718	94.1118	84.2819	72.9705	77.0782	69.3117	71.5437	59.7474	73.2754	62.4814	61.9407	47.4432	46.768	53.1418	19.404	32.1029	83.9175	94.7393	86.5735	76.422	57.4304	59.0863
ENSG00000003989	SLC7A2	318.627	382.378	293.16	271.752	307.809	286.001	394.895	362.335	415.436	373.737	360.393	328.369	320.957	443.851	351.055	208.998	248.511	208.382	201.957	185.768	235.729	236.982	163.062	250.001	988.418	832.461	895.725	2091.23	2083.11	2044.31
ENSG00000004059	ARF5	248.739	248.99	287.27	295.73	314.385	278.952	316.892	326.784	242.514	282.187	236.478	282.731	274.775	248.897	295.43	284.908	281.014	284.574	279.944	272.33	322.514	295.693	397.086	370.089	307.143	329.334	308.921	460.81	466.586	459.744
ENSG00000004139	SARM1	42.4441	37.7772	54.7122	24.894	34.8648	58.663	75.4092	107.747	90.7383	67.1799	64.0418	67.1737	81.6681	99.1483	50.0571	76.4423	104.877	71.7407	40.7517	49.752	59.188	30.4556	43.316	54.596	8.69215	6.97397	12.5686	13.1641	11.9592	3.87165
ENSG00000004142	POLDIP2	240.941	233.008	299.204	272.113	289.156	310.883	323.923	355.033	304.504	295.34	300.3	337.294	311.087	348.374	335.418	340.065	300.475	370.759	356.513	382.311	364.14	353.847	461.822	386.579	276.391	296.326	299.538	307.917	269.896	291.763
ENSG00000004399	PLXND1	135.266	175.627	166.681	173.841	189.42	174.219	126.757	140.158	131.801	103.397	88.9156	111.539	100.058	104.101	87.7636	164.636	204.041	148.713	180.047	207.166	212.273	238.049	295.927	281.661	190.676	224.677	248.457	118.465	112.819	126.021
ENSG00000004455	AK2	471.243	443.538	453.898	427.202	418.236	446.446	453.157	501.559	438.277	425.751	414.789	399.549	405.952	387.955	407.168	466.132	440.401	424.768	441.774	464.538	429.156	405.961	480.615	434.264	308.134	341.664	352.601	281.671	264.704	308.455
ENSG00000004478	FKBP4	808.688	873.688	952.775	941.733	969.052	872.122	1380.74	1549.15	1158.81	1085.56	1124.61	1112.79	1047.11	1051.28	1093.55	1102.14	975.603	1117.28	1043.03	1093.38	1076.18	945.571	1277.43	1204.7	1027.97	1032.06	1019.07	606.314	645.101	656.897
ENSG00000004487	KDM1A	1232.43	1256.06	1329.39	1374.75	1417.27	1357.5	1663.44	1776.38	1551.02	1484.18	1431.15	1610.62	1378.5	1464.04	1568.63	1424.54	1392.97	1387.99	1306.06	1288.71	1457.77	1381.33	1555.13	1500.01	1099.73	1110.9	1049.47	1073.21	1158.82	1099.18
ENSG00000004534	RBM6	361.013	384.606	382.034	400.333	328.048	347.276	355.013	372.255	313.159	369.437	324.571	382.427	354.838	353.361	326.181	372.699	275.979	371.783	329.623	393.94	384.568	311.488	355.856	406.908	369.708	325.556	381.043	406.598	335.285	378.199
ENSG00000004660	CAMKK1	17.284	31.1238	19.4235	27.9744	17.589	29.2044	18.526	28.0317	23.1969	24.7722	14.1887	17.8462	13.8542	13.2492	19.7777	14.7876	14.3875	17.4416	11.4315	9.72609	12.9006	20.2822	36.2359	24.0176	11.3375	9.60159	10.7388	5.01971	1.6117	1.16686
ENSG00000004700	RECQL	257.001	336.006	247.121	266.957	283.37	266.718	181.973	103.03	310.79	332.129	365.053	267.682	326.1	258.12	329.236	306.912	407.252	275.05	243.976	200.705	217.251	329.934	72.628	80.5794	362.299	357.265	385.636	381.384	429.746	372.012
ENSG00000004766	VPS50	57.1122	75.5863	53.3017	72.9334	64.2676	55.3876	41.9272	20.7642	45.3395	37.6968	76.6188	44.6155	69.2711	52.0506	63.0415	48.3062	73.2454	52.3249	75.2577	48.6304	50.4295	77.9265	16.6081	26.201	104.099	112.339	95.1851	128.505	123.295	121.354
ENSG00000004777	ARHGAP33	57.0498	60.0244	46.9	53.9507	56.0498	75.5285	32.0046	40.4524	43.1172	42.005	35.9151	41.9386	27.7084	42.4566	30.9027	41.4054	26.1591	38.5552	33.342	35.9865	35.1834	30.9571	31.7064	37.1181	23.7057	41.2868	33.6067	27.1065	35.3849	46.6744
ENSG00000004779	NDUFAB1	175.094	173.404	177.973	218.8	186.715	201.409	261.314	319.769	275.2	229.412	248.775	282.862	243.218	220.505	221.263	270.121	219.736	259.788	255.304	271.358	266.221	266.871	282.338	317.687	218.504	197.793	205.014	234.923	211.938	198.366
ENSG00000004864	SLC25A13	556.093	602.466	554.699	509.536	601.413	567.972	731.276	790.076	700.128	777.632	734.972	722.774	703.488	726.816	709.525	721.637	769.078	755.495	705.897	677.909	696.628	688.532	766.997	816.6	703.954	702.84	719.501	820.225	844.524	845.98
ENSG00000004866	ST7	59.454	82.7539	66.9662	54.1702	69.7587	65.5355	75.8148	92.1792	62.3266	79.4846	80.986	68.5921	80.184	65.4536	84.3648	80.2291	87.0152	62.1122	63.7628	78.616	71.0865	57.4913	91.2393	60.5579	58.0424	88.711	80.244	65.2882	52.8329	51.764
ENSG00000004897	CDC27	393.57	435.667	355.583	414.333	419.685	390.513	390.997	183.251	503.156	438.703	465.591	426.402	392.751	424.85	387.446	387.906	435.039	356.189	395.35	401.673	367.427	410.389	99.6488	172.065	578.948	569.194	582.085	506.023	497.259	486.054
ENSG00000004961	HCCS	78.9051	95.5944	88.5351	80.9261	94.7102	62.4369	155.033	151.579	131.801	149.71	161.751	156.154	172.408	141.01	187.888	172.522	153.031	179.006	140.989	148.809	165.362	166.528	164.571	183.407	141.203	145.944	134.236	97.3825	117.654	101.517
ENSG00000004975	DVL2	179.603	173.404	182.491	181.834	171.155	169.184	188.185	191.03	130.746	179.867	171.21	202.555	180.875	175.079	148.333	197.168	160.878	195.53	181	179.933	186.472	181.473	223.455	228.167	196.86	218.916	228.444	232.915	261.901	228.705
ENSG00000005007	UPF1	367.472	446.848	398.409	427.61	413.342	391.741	497.277	552.327	467.102	511.599	440.794	432.771	494.904	468.455	514.222	574.746	630.434	540.69	585.865	571.893	711.88	540.149	770.013	693.235	511.217	540.568	554.02	481.892	496.402	506.419
ENSG00000005020	SKAP2	18.7869	42.2394	26.1992	34.9681	43.2961	33.2326	39.9771	28.0317	50.6115	40.9279	27.4314	37.477	40.793	47.3187	32.1388	29.5753	30.083	27.5394	16.1947	12.6439	19.9373	26.6871	1.50983	15.2839	39.1659	29.7649	27.8233	51.2011	42.71	70.0117
ENSG00000005022	SLC25A5	926.136	1073.19	1120.75	1296.63	1197.8	1067.2	1621.24	1726.61	1399.07	1464.11	1397.62	1428.44	1383.35	1377.2	1393.81	1580.87	1355.75	1536.28	1459.15	1528.69	1573.79	1566.61	1987.83	1793.34	1472.4	1476.5	1432.4	1416.41	1456.56	1372.82
ENSG00000005059	MCUB	82.6624	77.8094	79.9526	59.9452	54.1201	60.4228	95.5551	93.4388	93.8422	102.32	85.132	90.1234	83.895	84.2274	97.6525	101.542	94.1727	96.3879	83.8313	78.7813	87.9585	66.1841	57.3735	73.1445	57.7182	51.8486	53.6942	79.3115	107.178	77.0128
ENSG00000005075	POLR2J	105.377	91.1111	106.99	87.0538	99.2197	119.18	96.7572	117.424	86.5965	94.6209	86.7661	97.2315	91.8526	102.271	114.685	123.849	84.8713	100.006	118.891	137.917	126.395	94.4296	142.487	143.331	87.7213	107.035	104.091	108.108	92.9276	91.5142
ENSG00000005100	DHX33	535.051	580.236	564.186	550.498	583.144	570.996	867.798	861.713	826.655	823.943	817.265	820.925	782.762	760.886	828.191	785.716	855.403	781.2	763.058	727.509	771.69	708.81	751.895	736.903	439.07	499.282	472.996	263.033	227.249	256.709
ENSG00000005108	THSD7A	33.8164	44.4625	27.1026	24.9772	35.8546	32.2255	18.526	13.4967	29.5234	21.541	23.6478	25.877	33.8659	24.6057	25.9582	15.7735	24.8511	19.2776	94.3103	95.3157	78.5763	193.215	96.6291	85.1533	96.8841	103.697	99.5781	99.3904	77.3615	98.0164
ENSG00000005156	LIG3	320.421	301.36	353.486	337.749	310.843	354.68	427.761	472.618	392.252	451.093	425.752	439.047	453.373	436.982	445.23	454.045	376.652	420.307	424.419	392.828	398.064	325.09	501.235	431.444	344.67	345.221	364.439	328.755	342.758	343.365
ENSG00000005175	RPAP3	432.099	420.171	374.918	370.661	384.93	400.805	206.711	102.783	330.029	379.122	458.766	316.771	370.215	250.789	383.193	296.738	341.376	300.18	235.299	202.303	161.844	375.754	75.4915	79.6947	404.027	372.541	384.646	276.084	283.659	276.546
ENSG00000005187	ACSM3	28.3217	24.6005	29.5809	20.9231	22.1757	29.7473	12.5179	5.19105	7.42753	10.8596	6.03587	13.8975	8.93253	5.67966	4.94603	5.93325	3.92386	0.935874	4.76334	6.80978	8.72413	10.9354	13.2635	14.4558	4.1229	12.3063	6.91337	8.03154	6.45713	7.05987
ENSG00000005189	REXO5	39.0768	24.4544	34.7816	33.969	27.7366	43.303	17.5509	18.6878	16.8705	12.9246	22.7019	12.4923	24.6297	11.3565	21.0138	17.7452	17.0034	22.9495	26.6736	27.233	28.1467	24.5522	25.6671	43.6683	23.7057	31.6852	23.9183	19.0749	19.3404	22.1704
ENSG00000005194	CIAPIN1	248.615	194.878	255.181	290.616	258.861	258.543	254.489	300.893	242.218	240.661	270.652	281.462	232.595	280.404	260.786	256.065	220.38	283.674	275.257	265.408	315.658	295.447	374.711	363.373	308.914	317.888	297.854	263.39	303.037	297.802
ENSG00000005206	SPPL2B	126.248	140.057	149.064	120.89	129.888	126.888	113.106	133.929	104.386	109.859	113.509	127.6	116.991	128.707	133.494	114.357	129.487	116.407	139.084	127.339	129.006	116.356	129.845	171.398	108.222	116.179	109.829	187.737	164.393	178.53
ENSG00000005238	FAM214B	14.2781	22.2313	18.9718	22.979	21.6481	17.1198	28.2765	29.0699	20.0337	18.3099	18.9182	22.3078	21.551	23.6594	19.7777	32.5328	17.0034	29.3754	27.6262	37.9317	46.9112	38.4295	48.3146	42.5766	50.5034	48.9681	65.8973	84.3312	90.2551	96.8495
ENSG00000005249	PRKAR2B	321.632	391.27	307.614	297.728	280.748	268.882	478.751	339.494	530.366	504.059	517.413	439.017	476.431	417.351	530.29	460.388	533.645	498.463	540.141	528.126	497.259	745.105	267.24	391.923	392.69	482.96	406.611	535.101	511.714	465.578
ENSG00000005302	MSL3	82.9138	88.925	77.6941	79.927	81.9591	78.7972	94.0266	101.745	95.3676	117.953	125.806	104.4	97.818	113.565	107.541	101.542	105.944	120.255	120.984	121.576	121.421	114.221	92.0997	109.774	92.7613	91.2151	103.971	180.307	192.598	211.202
ENSG00000005339	CREBBP	434.355	366.816	415.121	390.643	370.046	376.636	445.599	466.156	420.709	454.515	345.257	464.002	445.645	495.9	462.304	391.38	503.563	463.58	524.899	466.851	547.687	444.074	557.128	487.992	544.199	512.725	574.042	471.853	465.782	465.578
ENSG00000005379	TSPOAP1	39.0768	40.0163	37.4919	34.9681	31.1191	42.296	29.2516	26.9934	21.0881	19.3869	24.5937	32.1232	30.7871	25.5521	30.9027	24.646	30.083	15.6057	30.4841	36.9591	19.9373	12.8098	10.5688	20.7425	14.4295	24.9641	22.4539	30.1183	23.3696	17.5029
ENSG00000005436	GCFC2	133.011	148.949	116.086	125.775	129.212	120.846	98.4803	51.9105	144.454	129.246	128.644	115.862	103.137	109.743	119.902	105.168	145.183	111.994	81.9261	77.7084	72.7123	91.0331	43.7851	44.76	89.6693	107.538	98.0578	110.434	125.895	92.9679
ENSG00000005448	WDR54	77.4021	75.5863	77.2423	65.9398	78.4742	75.5285	78.9792	94.4771	62.21	60.3148	66.2137	54.4309	70.0408	69.0854	74.1664	76.8957	68.0136	80.7822	73.3524	74.8909	68.0212	61.9142	75.4915	89.5201	35.0432	35.5259	35.6334	32.1262	49.1568	43.1739
ENSG00000005469	CROT	24.7987	35.57	22.5855	32.9699	27.7366	24.1691	27.3015	29.0699	32.6866	36.6197	32.161	24.9847	20.7813	25.5521	30.9027	25.6319	27.467	22.9495	33.342	32.0961	39.8745	37.362	21.1376	20.7425	20.6136	22.0836	20.0133	24.0946	23.3696	19.8366
ENSG00000005471	ABCB4	9.7692	11.1156	12.6479	6.99361	11.5005	7.04933	4.87526	2.07642	2.10881	5.38525	3.78364	2.67693	0	3.7855	1.23611	4.92921	2.61591	2.75394	0	4.86304	3.51834	3.20246	6.03932	5.45854	3.09204	3.84063	5.36941	1.00394	1.6117	2.33372
ENSG00000005483	KMT2E	294.579	295.676	286.835	265.758	291.573	266.868	204.634	146.311	270.983	240.182	234.586	263.232	231.673	239.433	206.43	197.073	232.816	190.94	281.978	286.727	239.248	319.141	107.198	132.097	374.108	411.909	401.729	582.212	550.392	527.421
ENSG00000005486	RHBDD2	95.4375	66.6938	98.4727	103.905	109.593	93.6554	72.1539	67.4836	66.4276	74.3164	74.7269	84.7695	78.5073	90.852	88.9997	91.6833	91.5568	89.044	94.3103	84.617	102.032	89.6688	107.198	108.079	97.9147	97.9361	94.2088	113.446	96.7019	108.518
ENSG00000005513	SOX8	38.3253	48.9088	51.0432	48.9553	39.2371	47.3312	60.4532	85.1331	75.9173	50.6214	34.9987	52.6463	58.4956	53.9433	67.9859	62.108	69.3216	45.899	40.0104	25.2878	37.529	19.2147	46.8047	36.0264	5.15341	4.80079	7.81006	2.00789	4.02924	1.16686
ENSG00000005700	IBTK	383.253	449.071	321.166	332.696	362.605	381.671	255.464	117.318	409.11	392.046	402.013	357.817	387.917	349.212	416.568	341.101	370.151	342.407	317.226	296.646	221.655	335.191	87.5702	123.363	485.45	476.239	462.745	426.676	459.334	473.745
ENSG00000005801	ZNF195	538.808	609.137	523.533	522.523	514.142	549.848	336.393	233.597	462.884	558.99	663.083	461.324	527.999	450.475	574.79	568.831	763.845	515.905	434.399	354.029	304.923	530.541	170.611	185.59	430.825	369.661	416.373	332.305	290.911	271.878
ENSG00000005810	MYCBP2	426.492	366.965	385.705	398.182	351.384	334.587	409.41	306.064	411.417	443.557	427.858	433.543	439.225	412.689	369.161	250.815	340.887	286.883	369.535	330.461	339.512	412.896	163.736	213.683	388.677	353.628	373.221	416.821	451.231	422.548
ENSG00000005812	FBXL3	103.265	168.741	100.285	133.543	112.514	101.735	112.273	46.7194	138.951	146.363	155.449	128.329	149.929	143.641	167.609	171.513	180.391	125.985	161.163	142.911	133.096	143.671	34.7411	61.1357	183.446	218.943	199.858	186.58	230.809	212.527
ENSG00000005882	PDK2	23.3837	35.5687	32.1258	41.6098	38.2262	45.8951	26.8271	35.5436	30.1539	24.7693	33.5969	29.8513	35.6251	34.0695	31.4671	28.959	33.2557	26.8203	25.9834	27.2488	24.612	41.6319	35.0628	31.6595	53.6246	52.2199	47.4179	77.4442	76.9628	79.3224
ENSG00000005884	ITGA3	117.982	102.264	122.865	89.9178	100.122	109.768	56.553	74.7511	61.1556	50.6213	51.0792	56.2156	45.4111	82.3346	59.3332	53.2355	78.4773	57.8327	40.0104	55.4387	41.0473	42.6994	51.3342	39.3015	41.2273	31.6852	55.6467	124.489	108.789	137.69
ENSG00000005889	ZFX	160.816	206.751	176.619	190.826	173.185	177.24	228.162	140.158	269.928	278.956	297.016	256.985	330.192	317.036	296.666	308.569	345.3	277.23	304.841	246.07	242.765	234.847	93.6095	111.354	535.955	449.354	529.13	328.289	333.622	322.053
ENSG00000005893	LAMP2	294.579	355.7	275.091	360.671	350.428	309.164	308.117	273.049	422.817	292.958	327.285	331.047	318.647	348.266	317.679	324.342	345.3	328.637	324.847	286.919	322.515	335.191	206.847	243.451	557.598	439.753	535.477	810.181	789.732	786.465
ENSG00000005961	ITGA2B	27.0532	15.5619	18.0684	20.9808	13.53	20.1409	7.80042	11.4203	8.43525	3.23115	10.405	8.03079	12.3149	4.73187	7.41664	6.90089	11.7716	10.0978	9.52629	9.72609	5.8639	3.20246	15.0983	8.73367	9.27613	15.3625	8.29818	14.0552	8.05848	9.33489
ENSG00000006007	GDE1	281.052	275.667	274.189	293.732	288.866	316.212	353.944	364.411	366.933	326.347	335.799	323.017	279.394	334.07	307.79	345.045	302.137	342.141	373.431	344.304	354.179	355.473	443.889	459.609	314.358	330.295	317.284	356.4	332.01	357.06
ENSG00000006015	REX1BD	125.497	137.834	130.544	137.874	133.271	117.825	132.607	133.929	110.713	138.939	134.319	124.031	120.07	120.19	102.597	143.933	141.259	122.091	134.321	143.946	145.425	127.031	158.532	144.105	106.16	127.701	113.246	107.422	108.79	113.186
ENSG00000006016	CRLF1	11.3437	6.66938	15.4557	23.9666	23.4782	21.6776	19.2556	21.9959	12.8671	15.4673	14.1731	15.0847	18.1315	22.0759	25.8551	29.184	31.2836	47.6254	53.4	52.5786	48.117	113.06	112.912	108.962	88.8002	137.501	111.007	19.5507	21.5844	21.1463
ENSG00000006025	OSBPL7	15.0295	13.3388	14.003	11.989	12.8535	19.1339	11.7006	5.19105	9.48966	11.8476	8.5132	16.9539	10.0058	10.4101	19.7777	20.7027	13.0795	23.8675	13.3368	18.4796	14.0734	13.8773	12.0786	14.1922	19.583	20.1633	14.1557	28.1104	19.3404	24.5041
ENSG00000006042	TMEM98	261.514	228.982	255.634	225.571	265.865	248.741	228.162	270.972	191.902	229.208	219.452	201.662	207.814	176.972	213.846	241.532	226.276	241.429	215.294	228.563	225.174	199.62	246.102	228.167	199.952	210.275	202.085	194.765	192.593	183.197
ENSG00000006047	YBX2	87.1713	75.5863	88.0834	101.907	96.7397	91.6413	78.0042	77.8657	53.7747	53.8525	62.4301	41.0463	49.2594	60.568	60.5692	55.2072	48.3943	50.4889	32.3894	44.74	45.7384	35.227	34.7261	26.201	46.3807	46.0876	58.0873	84.3312	75.7498	91.0151
ENSG00000006062	MAP3K14	21.0413	24.4544	30.9687	23.7931	22.6858	25.9041	23.2648	20.0579	17.9249	25.6317	21.7559	21.4155	26.1691	17.7969	19.6307	37.327	39.0073	28.4058	19.0526	17.507	18.6342	17.0798	21.1376	26.0611	6.18409	10.5617	9.27444	16.0631	15.3111	7.00117
ENSG00000006071	ABCC8	18.0354	22.2313	18.5201	17.9836	14.883	20.1409	11.7006	10.3821	9.48966	6.4623	7.56729	15.1693	8.46647	9.46375	9.88886	8.87258	7.84773	15.6057	8.57366	8.75348	5.8639	2.13497	3.01966	3.27512	3.09204	0.960159	3.4169	0	1.6117	0
ENSG00000006118	TMEM132A	141.278	166.734	175.715	180.835	184.008	157.099	234.988	216.3	191.773	260.646	213.776	262.339	219.265	255.521	252.166	229.701	243.279	239.492	202.91	222.727	205.237	171.616	234.024	221.617	183.461	182.43	174.262	246.97	278.018	277.713
ENSG00000006125	AP2B1	1358.22	1332.61	1347.36	1356.45	1324.19	1280.68	1501.22	1647.06	1294.33	1412.15	1328.44	1422.8	1428.9	1441.82	1316.89	1248.89	1328.63	1284.76	1322.85	1392.23	1457.77	1518.38	1933.96	1845.55	1543.11	1656.32	1581.26	1668.59	1724.26	1706.55
ENSG00000006128	TAC1	51.8519	53.355	40.6539	18.9827	24.3541	34.2396	8.77547	10.3821	11.5985	14.0016	12.2968	8.03079	12.3149	10.4101	9.88886	13.8018	18.3114	17.4416	7.62103	5.83565	4.69112	2.13497	3.01966	1.09171	3.09204	0.960159	0.976257	0	0	2.33372
ENSG00000006194	ZNF263	175.985	159.051	186.156	168.049	150.073	136.117	143.287	195.373	148.028	162.897	166.541	182.84	138.592	178.76	160.727	173.064	144.469	157.018	147.66	163.266	183.789	181.833	181.192	167.237	160.928	111.437	169.571	145.802	132.167	153.143
ENSG00000006210	CX3CL1	3.00591	13.3388	4.5171	8.99179	13.53	4.02819	5.85031	13.4967	5.27203	7.53935	5.67546	5.35386	11.5452	7.571	2.47221	9.85842	3.92386	9.1798	4.76315	6.80826	8.20946	4.26994	6.03932	7.64196	4.12273	9.60159	9.76257	1.00394	1.6117	1.16686
ENSG00000006282	SPATA20	105.207	80.0325	91.6971	96.9115	98.7692	109.768	61.4283	66.4454	61.1556	74.3165	75.6728	65.1387	68.5014	68.139	79.1108	63.4169	60.1659	73.4384	100.512	78.7813	70.3668	60.8467	83.2623	81.8899	60.8102	68.1743	69.3225	89.3509	83.8084	94.7765
ENSG00000006283	CACNA1G	26.3017	40.0163	39.2988	38.9588	43.2961	32.2255	42.9023	47.7576	32.6866	36.6197	36.8905	26.7693	30.7871	31.2304	34.611	63.0939	69.3216	76.1923	80.0208	95.3157	80.9218	67.2516	117.767	92.7952	116.467	136.342	122.52	11.0434	16.9228	5.83431
ENSG00000006327	TNFRSF12A	184.112	126.718	168.939	122.888	144.095	183.283	101.405	113.165	95.951	88.3181	68.1056	72.2771	88.513	84.2274	100.125	90.6974	71.9375	98.2239	91.4524	77.8087	79.749	87.5338	113.237	109.171	90.7	75.8525	102.507	87.343	74.9439	59.5099
ENSG00000006377	DLX6	0	0	0	0	0	0	0	0	0	0	0	0	5.38775	16.0884	12.3611	12.8159	10.4636	9.1798	14.2894	16.5343	16.4189	37.362	30.1966	39.3015	105.13	126.741	107.388	84.3312	104.76	105.017
ENSG00000006432	MAP3K9	181.857	175.627	194.235	168.846	167.096	148.036	195.01	233.597	194.011	180.944	166.48	186.493	167.79	203.471	156.986	143.933	177.882	165.236	172.426	154.645	172.399	187.878	243.083	218.342	245.302	264.044	247.969	273.072	262.707	250.875
ENSG00000006451	RALA	919.705	960.39	778.233	805.23	752.771	786.161	712.721	554.288	842.383	759.32	824.835	686.111	677.317	656.697	641.54	623.052	687.984	697.664	624.925	596.126	617.985	642.626	329.143	419.216	547.292	537.65	522.298	555.18	576.928	603.169
ENSG00000006453	BAIAP2L1	196.635	215.643	216.141	206.083	184.82	193.581	167.887	162.294	166.093	135.27	149.195	158.502	123.783	147.024	163.547	119.811	102.838	107.105	128.662	150.814	122.441	134.101	166.109	174.408	127.223	135.118	118.457	95.4916	118.558	111.032
ENSG00000006459	KDM7A	302.846	391.27	287.738	301.725	271.953	291.036	151.133	88.2478	190.848	164.789	157.021	166.862	218.589	228.076	181.708	184.353	257.667	169.826	260.068	245.097	218.137	362.945	116.257	169.215	1300.73	1323.11	1346.71	546.145	565.707	567.097
ENSG00000006468	ETV1	901.017	1058.21	773.325	832.239	828.714	879.151	749.814	482.768	863.561	837.945	811.593	772.74	758.903	672.873	752.79	617.137	656.594	590.26	763.056	713.894	725.95	717.35	320.084	405.024	494.727	510.804	527.667	371.459	387.613	358.226
ENSG00000006530	AGK	199.763	206.091	193.264	194.797	208.631	228.21	179.41	117.487	157.41	160.48	145.957	167.722	159.962	181.704	176.498	153.113	152.286	191.858	190.282	182.657	207.704	154.094	159.7	176.268	140.637	136.34	155.318	132.52	158.716	166.831
ENSG00000006576	PHTF2	206.656	262.329	189.718	199.817	211.069	199.395	168.684	80.9803	253.057	218.641	213.776	214.154	237.061	213.881	222.499	224.772	273.363	188.186	211.484	212.029	159.498	243.387	63.4129	81.8781	256.64	286.127	253.828	276.084	255.454	292.882
ENSG00000006607	FARP2	91.0545	111.156	114.823	108.841	96.3468	83.5833	144.197	152.617	133.232	120.628	136.318	132.511	133.153	139.887	119.112	111.27	115.1	103.871	105.19	112.559	111.414	154.183	140.364	141.932	147.892	113.433	140.143	136.586	131.286	114.035
ENSG00000006625	GGCT	501.071	457.964	458.894	468.549	459.989	512.523	469.959	317.683	495.553	459.887	531.57	457.955	523.345	398.37	452.414	487.005	521.873	479.186	427.626	400.676	398.727	425.884	175.065	229.202	406.987	397.709	402.707	339.053	365.01	312.696
ENSG00000006634	DBF4	403.889	478.855	417.488	372.401	396.275	411.324	329.361	215.662	419.885	425.599	558.109	404.515	433.006	370.8	471.07	455.933	519.691	468.38	361.788	330.719	263.765	370.659	125.93	138.111	410.772	410.241	373.014	277.286	261.699	244.614
ENSG00000006652	IFRD1	759.165	886.984	712.924	759.283	813.407	798.643	415.306	368.564	459.299	510.982	454.094	458.648	465.099	428.762	464.445	592.483	565.036	528.906	482.063	424.746	460.324	509.902	280.046	357.406	442.637	415.545	446.651	432.741	424.681	401.006
ENSG00000006695	COX10	107.389	111.156	102.516	105.854	107.564	97.6836	99.4252	106.916	95.0611	87.241	102.264	110.646	107.806	94.0275	85.853	101.542	91.5568	117.501	100.979	102.586	125.532	80.0614	140.414	95.2435	67.1649	82.6524	83.0472	64.2523	64.699	57.1762
ENSG00000006704	GTF2IRD1	217.177	180.073	208.69	167.847	181.979	196.374	107.256	101.744	95.951	93.7033	91.7534	84.7695	90.8221	86.1201	103.833	92.6692	70.6295	99.1418	89.5472	66.1374	68.0212	87.5338	110.218	91.7035	85.5466	97.9362	93.7207	80.3154	79.779	75.8459
ENSG00000006712	PAF1	68.3844	73.3631	86.7284	63.9416	85.2392	58.4088	136.507	121.471	95.9511	114.167	118.239	132.954	123.148	125.868	126.083	109.429	90.2489	110.158	163.852	131.302	148.943	139.841	158.532	177.948	138.111	134.422	143.998	120.473	133.771	123.687
ENSG00000006715	VPS41	243.478	251.213	268.315	251.77	277.365	235.649	323.717	222.177	347.954	361.89	346.203	382.801	383.301	353.945	414.095	341.101	385.846	317.621	318.178	344.303	303.75	292.491	157.022	187.774	354.554	375.422	365.121	490.928	464.169	492.415
ENSG00000006740	ARHGAP44	122.491	126.718	110.217	120.89	123.8	105.74	94.58	110.05	118.094	70.0083	84.1861	78.5233	83.8949	83.281	82.8192	83.7966	56.242	73.4384	91.4523	85.5896	89.1313	91.8038	123.806	80.7864	96.884	81.6135	94.6969	75.2957	74.1381	79.3465
ENSG00000006744	ELAC2	215.674	257.882	268.316	261.761	275.336	202.416	374.42	425.666	332.138	427.589	378.364	344.432	372.525	401.263	391.846	394.337	355.764	366.274	412.488	476.578	435.101	357.608	510.322	465.068	295.806	328.374	302.152	248.978	233.696	232.205
ENSG00000006756	ARSD	53.2256	48.7411	56.4637	37.7492	46.6786	70.839	27.3015	21.8024	12.4683	14.0016	33.1069	28.5539	27.7084	36.8154	18.5413	17.7452	24.8511	25.7034	33.342	16.5307	24.6284	24.5522	19.1695	28.339	51.5341	54.729	36.1215	238.918	197.432	211.066
ENSG00000006757	PNPLA4	46.5916	33.3469	49.6881	55.9489	58.1791	51.3594	35.1019	30.1081	25.3058	39.8508	38.7823	35.6924	36.1749	42.5869	48.2082	43.377	53.6261	50.4889	42.8683	37.9317	71.5396	39.497	30.1966	34.9347	32.9818	45.1275	28.7996	54.2129	64.4679	65.3442
ENSG00000006831	ADIPOR2	232.206	253.436	255.216	321.706	292.249	225.579	370.52	424.628	372.205	385.584	351.879	368.524	354.052	336.909	379.485	374.62	347.916	391.059	409.631	422.112	485.531	358.675	439.361	497.819	499.881	471.438	467.627	390.534	362.632	394.399
ENSG00000007047	MARK4	133.011	117.826	148.613	129.881	127.182	154.078	130.657	138.082	94.8966	94.7804	91.7533	87.4464	103.907	98.423	80.347	73.9381	83.7091	70.6844	81.9261	77.8087	82.0946	104.614	129.845	116.813	106.16	114.259	123.008	173.682	160.364	158.693
ENSG00000007062	PROM1	451.636	526.881	495.526	544.503	523.612	578.045	624.034	530.525	624.209	668.85	646.055	642.463	657.307	579.18	625.471	801.488	920.801	870.246	941.198	891.881	915.94	781.397	628.089	768.562	428.764	489.681	450.543	167.659	186.957	189.031
ENSG00000007080	CCDC124	217.177	180.073	201.011	211.806	196.862	204.43	154.058	188.954	165.542	120.63	150.4	169.539	142.391	167.508	180.472	164.636	159.57	160.647	171.473	203.275	167.707	185.743	206.847	220.525	177.277	183.39	185.001	167.658	166.005	159.86
ENSG00000007168	PAFAH1B1	1100.8	1051.54	995.954	1013.03	1019.36	1037.22	906.798	721.554	980.597	889.488	986.562	886.956	990.58	960.231	955.511	903.029	936.497	875.752	1016.45	1038.75	1034.34	1005.57	573.735	691.051	1153.32	1150.27	1172.31	1119.4	1155.5	1056.93
ENSG00000007171	NOS2	11.2721	15.5619	11.7445	15.9854	10.824	16.1128	6.82536	9.34389	10.5441	7.53935	12.2968	8.03079	9.23614	13.2492	6.18054	3.94337	10.4636	6.42586	5.71577	5.83565	4.69112	2.13497	10.5688	5.45854	4.12273	0.960159	5.85754	40.1577	37.8749	21.0035
ENSG00000007202	KIAA0100	456.415	405.021	538.448	534.716	497.914	469.963	850.26	935.309	661.407	802.759	852.829	828.836	758.314	794.524	766.225	633.545	623.51	703.377	728.119	730.323	724.514	758.199	1066.84	963.844	747.714	752.842	749.123	703.159	653.386	636.307
ENSG00000007237	GAS7	78.905	42.2394	80.4044	102.906	112.976	115.81	57.5281	66.4454	52.7204	56.0066	46.3496	42.8309	33.8659	85.1737	49.4443	47.3204	45.7784	35.8012	65.7314	72.9456	51.6023	43.7669	83.0407	75.3278	293.744	209.314	303.129	468.842	477.87	522.754
ENSG00000007255	TRAPPC6A	43.5856	44.4625	50.1398	50.9535	54.1201	50.3524	27.3015	33.2227	33.741	32.3115	32.161	39.2617	45.411	46.3724	42.0276	31.5469	39.2386	42.2271	30.4841	38.9043	37.529	45.9019	51.3342	44.76	37.1045	28.8048	39.5384	65.2563	62.8562	58.343
ENSG00000007264	MATK	57.1122	82.2556	94.4074	68.937	71.7092	57.4017	91.6549	82.0186	54.8291	57.0837	46.3496	58.0002	56.9562	46.3724	55.6248	39.4337	56.242	50.4889	31.4368	37.9317	37.529	33.0921	46.8047	30.5678	15.4602	15.3625	10.2507	4.01577	1.6117	2.33372
ENSG00000007314	SCN4A	96.9405	111.156	125.124	127.883	120.417	120.846	65.3285	55.0251	34.7954	57.0836	40.6742	58.0002	47.7201	49.2115	46.9721	31.5469	35.3148	31.2113	39.0578	49.603	36.3562	33.0921	28.6868	41.4849	7.21477	9.60159	9.76257	4.01577	2.41755	9.33489
ENSG00000007341	ST7L	53.3884	79.6192	66.9303	69.9951	65.8178	66.9608	49.3003	46.4758	45.6895	46.3633	40.455	57.7538	49.9831	50.5043	66.3144	42.991	43.0079	57.4731	53.7303	51.1457	62.259	52.7488	44.8364	48.5171	44.3276	52.6735	39.1561	49.3017	52.4323	58.2486
ENSG00000007376	RPUSD1	63.1241	77.8094	71.3513	85.9215	73.7386	62.4369	95.5551	161.961	104.386	121.707	100.24	136.523	111.603	103.155	105.069	96.6125	147.799	119.337	94.3102	122.549	113.76	129.166	144.944	158.298	114.406	123.86	125.449	77.3036	80.5849	95.6826
ENSG00000007384	RHBDF1	45.8401	46.6856	53.7535	80.9261	86.5922	69.4863	41.9272	44.643	42.1763	51.6984	46.3496	51.754	53.1078	71.8668	53.1526	55.2071	48.3943	67.0125	55.2525	59.3291	64.5029	55.5093	77.0014	66.5942	110.197	69.1314	112.27	137.54	120.877	155.193
ENSG00000007392	LUC7L	241.976	213.42	265.154	294.731	269.248	251.762	334.443	330.151	282.581	327.423	312.151	348.001	330.962	325.553	348.582	349.974	372.767	331.391	362.952	403.632	362.389	312.773	372.928	405.024	290.652	299.57	297.758	212.836	212.744	228.705
ENSG00000007402	CACNA2D2	111.97	95.5944	119.177	136.875	130.565	143.001	86.6843	79.9421	86.8036	77.5476	70.9433	73.1695	64.653	90.852	72.9303	75.9098	68.0136	82.6182	96.2155	85.5896	80.9218	127.031	119.277	110.263	160.786	172.828	170.821	214.805	199.045	243.738
ENSG00000007516	BAIAP3	17.5992	22.3967	20.182	20.2178	19.221	15.3397	24.8938	18.9137	7.38246	22.747	20.1814	15.5515	14.9444	12.4951	17.6661	23.1365	23.657	15.0055	31.8602	25.566	26.1032	27.1596	50.9575	34.2	8.24591	10.7082	15.4043	8.18796	4.07236	9.47077
ENSG00000007520	TSR3	133.448	148.784	146.499	104.668	129.609	126.654	158.416	128.512	143.398	137.733	148.191	146.849	133.604	144.603	141.792	154.315	122.834	160.329	151.045	180.627	162.714	161.785	247.989	199.425	144.295	147.718	150.559	181.557	180.467	185.395
ENSG00000007541	PIGQ	104.001	106.71	98.4727	94.9133	83.2097	118.803	85.8046	112.127	88.5702	122.503	80.6035	112.621	98.5189	134.248	97.654	96.2888	105.298	101.896	94.3103	116.712	92.9915	116.77	111.727	125.546	98.1471	121.872	117.554	181.952	203.879	199.808
ENSG00000007545	CRAMP1	142.677	126.718	144.483	138.196	131.918	154.078	146.237	166.123	147.239	161.167	136.51	144.94	163.942	169.899	127.319	169.384	209.022	169.735	163.852	185.768	170.053	137.706	187.1	163.756	168.001	185.311	159.926	193.761	206.713	206.55
ENSG00000007866	TEAD3	130.006	106.71	121.058	111.898	101.475	117.825	95.5551	91.3624	75.9172	67.8541	69.9974	82.0925	80.0466	119.243	81.583	92.6691	75.8613	116.583	96.2156	109.905	98.5135	101.411	105.688	140.831	340.126	302.449	340.226	508.997	454.5	490.08
ENSG00000007923	DNAJC11	273.538	277.765	348.503	363.667	364.35	324.27	418.036	474.462	390.103	435.127	389.715	470.636	454.11	444.226	433.801	443.599	462.41	486.397	457.245	469.77	486.704	412.05	579.775	520.521	338.35	374.462	384.515	276.201	224.831	236.873
ENSG00000007944	MYLIP	141.278	128.941	147.258	140.871	164.39	140.986	154.058	158.846	125.474	149.71	144.724	141.877	148.548	144.796	164.402	153.791	155.647	156.057	120.031	126.439	126.66	101.411	125.316	114.629	180.37	153.625	165.964	225.887	264.318	285.88
ENSG00000007968	E2F2	33.065	35.57	32.9748	26.9754	37.2076	30.2114	34.1268	41.5284	30.5778	26.9262	29.3232	32.1232	33.8659	42.5869	39.5554	48.3063	44.4704	34.8832	39.0578	30.1509	35.1834	50.1718	63.4129	52.402	72.1477	70.0916	60.0398	25.0986	24.9813	21.0035
ENSG00000008018	PSMB1	580.143	631.369	639.619	649.407	665.003	634.438	811.246	867.946	700.128	752.859	809.697	793.262	725.035	706.941	772.568	819.232	736.379	792.212	824.025	854.925	944.086	840.106	1017.63	993.459	879.167	820.935	848.852	743.921	755.078	764.296
ENSG00000008056	SYN1	37.5738	31.1237	41.0471	20.9796	24.3531	38.2678	37.7189	43.6048	35.8498	32.3115	20.81	33.9078	27.7084	30.284	27.1944	24.646	20.9273	30.2933	21.9105	27.233	23.4556	20.2822	39.5326	25.1093	18.5523	20.1633	15.6201	14.0552	18.5345	10.5017
ENSG00000008083	JARID2	1790.03	1736.26	1626.6	1634.53	1623.6	1787.54	1945.19	2026.61	1745.01	1822.38	1834.14	1871.15	1854.98	1877.64	1678.65	1282.57	1472.76	1471.53	1268.9	1258.55	1319.38	1121.92	1316.58	1211.81	716.324	716.284	686.308	497.956	477.87	456.242
ENSG00000008086	CDKL5	238.969	246.767	216.369	203.814	205.656	209.466	225.237	140.158	210.881	204.639	234.586	222.185	230.134	220.505	216.318	216.885	211.889	187.268	180.047	135.192	177.09	129.166	49.8244	91.7035	145.326	144.024	143.51	212.836	223.22	236.873
ENSG00000008118	CAMK1G	15.781	11.1156	10.841	15.9854	20.295	13.0916	3.90021	2.07642	6.32644	1.07705	1.89182	1.78462	3.07871	11.3565	2.47221	0	1.30795	1.83596	0.952629	2.91783	0	1.06749	1.50983	0	3.09204	0.960159	0	80.3155	71.7205	65.3442
ENSG00000008128	CDK11A	97.2331	93.374	93.4734	89.307	83.6609	107.514	95.9239	114.574	83.8824	92.6978	76.5367	91.1419	117.29	95.0276	73.2688	95.6825	101.406	122.922	123.713	129.221	93.9429	82.8981	123.218	112.968	100.152	109.416	117.864	80.9217	92.5757	112.957
ENSG00000008130	NADK	232.958	220.089	251.602	235.785	226.628	244.713	221.337	234.635	216.153	204.639	209.046	252.524	204.735	229.023	208.902	208.998	205.349	245.101	230.536	213.974	241.593	233.779	282.339	259.826	208.197	216.036	219.658	187.737	190.986	199.533
ENSG00000008196	TFAP2B	0	0	0	0	0	0	0	0	0	0	0	0	0.769679	15.142	0	0	0	0	0	0	0	0	0	1.09171	4.12273	2.88048	4.88129	189.745	209.521	149.358
ENSG00000008256	CYTH3	77.4021	66.6938	67.3047	66.9388	72.3857	62.4369	89.7047	98.6299	73.8085	88.3181	94.5911	75.8464	72.3498	71.9245	81.5831	92.6692	96.7886	90.88	87.6419	88.5074	68.0212	99.2762	131.355	98.2537	131.927	105.618	107.876	101.398	91.0609	99.1832
ENSG00000008277	ADAM22	193.129	224.536	203.721	187.829	178.596	189.325	201.836	122.509	204.555	182.021	209.992	182.924	196.268	195.9	171.819	157.735	184.422	137.697	178.142	170.206	152.461	132.368	48.3146	79.6947	145.326	137.303	135.211	114.449	102.343	110.852
ENSG00000008282	SYPL1	313.366	404.609	317.553	428.61	397.108	322.255	581.128	411.13	698.018	558.99	646.056	497.911	545.704	596.218	636.597	573.759	680.135	570.061	546.808	512.563	534.789	527.34	258.181	346.071	734.873	720.113	716.573	1061.17	1125.77	1030.34
ENSG00000008283	CYB561	108.964	73.3631	104.796	90.917	83.2097	83.5849	89.7048	100.706	64.3188	91.5492	92.6992	79.4157	85.4343	94.6375	86.5275	82.8107	68.0136	81.7002	83.8314	85.5896	99.6863	112.086	137.395	152.839	219.535	260.203	207.455	169.666	155.529	193.699
ENSG00000008294	SPAG9	396.028	384.601	389.373	370.662	382.224	345.417	420.247	311.463	398.566	353.272	355.663	344.432	350.974	345.427	359.707	322.37	395.003	282.738	320.083	312.207	369.425	364.013	185.709	304.587	375.168	326.454	351.941	401.577	394.06	446.907
ENSG00000008300	CELSR3	163.822	186.742	219.983	242.778	209.715	171.198	224.262	237.75	182.412	232.643	173.102	193.631	219.358	206.31	194.069	166.607	219.736	167.072	160.042	160.481	175.917	153.718	238.553	172.49	111.314	127.701	124.961	150.591	136.188	149.358
ENSG00000008311	AASS	4989.83	5893.53	4549.13	2925.33	3042.92	3325.26	3746.14	2432.53	4732.19	4510.68	4756.96	4345.56	4504.2	4046.7	4254.69	3215.83	4004.97	2567.59	2468.26	2217.54	2089.9	1396.27	652.247	826.423	580.274	517.526	530.597	647.543	667.242	663.944
ENSG00000008323	PLEKHG6	58.6152	60.0244	63.6911	78.9279	66.2971	53.3735	48.7526	67.4836	74.8629	42.0049	33.1069	60.6771	43.102	34.0695	58.097	52.2496	47.0863	62.4226	53.3472	69.0552	60.9846	87.5338	119.277	117.905	77.3011	83.5338	88.3513	63.2484	56.4094	61.8437
ENSG00000008324	SS18L2	139.023	164.511	146.806	130.88	135.977	132.93	221.337	220.1	221.904	242.337	253.504	213.262	214.741	192.114	208.902	186.324	180.498	195.53	155.279	151.727	175.917	162.258	155.513	153.931	153.571	133.462	143.022	98.3865	94.2843	89.8483
ENSG00000008382	MPND	42.6466	39.904	53.6356	48.9553	46.5911	51.3594	53.1837	53.9197	45.2423	31.949	25.5396	39.2617	39.1337	49.9066	34.3199	51.7418	49.6625	34.8417	58.7228	46.6981	40.8926	54.1054	75.4054	75.2094	60.1834	47.2361	63.0021	84.2529	68.6126	74.5346
ENSG00000008394	MGST1	964.892	1058.21	906.58	969.118	1026.26	919.435	1175.91	853.409	1390.77	1348.47	1402.78	1252.8	1259.19	1056.15	1396.8	1272.72	1402.12	1287	1061.23	1099.05	974.58	1068.55	685.464	819.87	834.85	788.288	814.686	325.278	373.913	323.221
ENSG00000008405	CRY1	190.124	244.544	173.005	206.811	224.599	195.367	193.06	172.343	252.003	187.407	201.479	206.124	205.504	179.811	216.319	212.942	231.508	245.101	242.92	248.988	280.295	264.736	170.611	225.984	229.842	192.992	227.468	217.856	203.88	241.54
ENSG00000008513	ST3GAL1	46.5916	37.7931	51.4949	51.9526	39.9136	47.3312	34.1268	49.8341	37.9586	36.6197	34.9987	35.6924	33.8659	53.9434	23.486	30.5611	35.3148	39.4732	21.9105	47.6578	45.7384	56.5767	64.9227	64.4108	41.2273	48.9681	34.6571	404.59	346.515	420.07
ENSG00000008516	MMP25	111.532	115.441	115.413	78.056	87.8381	95.6637	77.2093	90.3242	59.1632	53.707	48.2346	60.4431	52.4687	59.2572	55.5824	30.5293	60.1659	46.6945	36.0754	40.8496	39.8745	20.9246	21.9462	22.2029	10.3068	4.40006	11.2911	12.7514	7.37174	11.1821
ENSG00000008710	PKD1	167.022	187.865	211.044	221.065	188.203	184.85	174.525	196.476	154.824	193.586	161.658	181.231	170.71	180.502	174.877	153.795	231.041	163.662	129.191	150.183	141.198	161.803	186.865	142.496	85.4567	115.542	115.597	111.51	96.6135	144.409
ENSG00000008735	MAPK8IP2	30.0591	37.7931	24.3923	10.99	11.5005	18.1269	32.1767	53.9869	36.9042	36.6197	34.9987	34.8001	42.3324	35.0159	32.1388	31.5469	48.3943	47.735	17.1473	40.8496	35.1834	22.4172	22.6475	18.559	5.15341	5.76095	7.32193	10.0394	6.44679	9.33489
ENSG00000008838	MED24	198.39	195.635	201.463	241.779	234.07	199.395	291.54	303.157	250.949	291.881	280.935	307.847	279.393	282.966	341.166	277.022	278.594	296.508	345.804	310.262	335.415	322.381	446.91	394.107	321.573	320.693	318.748	296.163	284.465	290.548
ENSG00000008853	RHOBTB2	35.9141	28.8931	38.8223	30.6927	31.6997	44.9602	50.5981	49.3531	34.9385	49.7928	54.6991	44.2278	70.2223	80.8942	101.964	137.296	133.874	165.147	137.678	136.087	162.963	142.399	179.506	134.581	118.46	128.781	122.721	178.376	161.805	178.291
ENSG00000008869	HEATR5B	176.597	168.958	168.939	129.881	167.096	157.099	140.408	137.044	154.998	166.943	168.372	156.154	147.778	146.688	156.986	110.414	170.034	120.255	144.8	171.179	159.498	166.528	111.727	150.656	186.553	157.466	177.679	265.041	260.289	248.541
ENSG00000008952	SEC62	731.186	875.912	647.3	621.432	654.176	679.758	403.671	236.712	661.113	742.087	881.588	650.494	725.806	562.147	752.79	689.103	911.645	677.469	568.72	447.4	419.855	625.546	150.983	164.848	703.956	635.625	696.072	665.614	632.591	605.601
ENSG00000008988	RPS20	2315.01	2374.28	2567.13	2559.91	2716.89	2652.32	2989.31	3246.46	2738.24	2989.51	3104.07	3011.74	2876.83	2742.38	2915.52	3091.77	2612.23	3215.06	3078.11	3162.65	3135.21	2935.9	3666.16	3615.87	3213.3	3324.1	3143.79	2647.72	2842.87	2708.48
ENSG00000009307	CSDE1	3655.9	3857.71	3606.02	3768.66	3870.41	3752.09	4577.81	3795.66	4505.42	4515.53	4916.9	4629.78	4528.04	4459.22	4561.54	4375.41	4642.53	4542.12	4518.57	4726.77	4715.83	4257.79	2758.96	3734.71	4362.28	4279.65	4255.6	4281.79	4368.84	4458.76
ENSG00000009335	UBE3C	384.755	431.286	378.984	393.64	421.462	398.792	496.301	491.073	482.918	397.431	443.632	445.261	414.088	419.243	415.332	367.72	370.151	391.978	385.814	412.386	428.064	331.988	397.086	394.107	384.445	367.741	426.137	374.471	332.009	365.228
ENSG00000009413	REV3L	138.028	146.565	117.871	123.493	121.042	144.925	41.4198	40.2274	101.058	132.477	135.156	92.6134	115.403	100.123	143.005	65.0656	120.22	53.4634	77.1336	40.8496	53.9479	137.021	43.5807	34.8231	405.953	351.078	406.617	366.959	337.701	383.545
ENSG00000009694	TENM1	29.3076	17.785	20.3269	15.9854	16.236	18.1269	11.7006	9.34389	16.8705	20.4639	21.7559	17.8462	18.4723	26.4985	23.486	9.85842	22.2352	7.34384	17.1473	6.80826	9.38224	17.0798	12.0786	6.55025	29.8898	24.9641	33.6809	29.1143	29.8164	36.1727
ENSG00000009780	FAM76A	89.4257	104.487	71.3702	62.9425	69.6797	68.4792	59.4782	68.5218	63.2644	37.6967	50.1333	50.8617	52.3382	52.0506	45.736	49.2921	54.9341	59.6687	40.0104	42.7948	50.4295	43.7669	33.2163	30.5678	41.2273	35.5259	31.7283	36.1419	46.7392	47.8413
ENSG00000009830	POMT2	84.9169	100.041	101.183	81.9252	88.6217	93.6554	111.156	103.821	75.9173	103.397	102.158	109.754	100.828	94.6375	117.43	93.655	100.712	109.24	101.931	115.74	112.587	112.086	113.237	138.647	128.835	136.343	129.842	133.524	131.353	119.02
ENSG00000009844	VTA1	475.687	569.12	470.682	559.488	558.114	512.586	547.005	270.972	637.919	594.532	623.354	581.789	564.173	519.56	636.594	611.223	622.587	567.311	495.367	462.962	469.112	487.841	175.14	216.158	734.874	730.682	679.963	563.212	558.453	549.591
ENSG00000009950	MLXIPL	21.0413	22.2312	18.0684	23.9781	18.942	17.1198	11.7006	12.4585	8.43525	7.53935	11.3509	5.35386	11.5452	10.4101	9.88886	13.8018	9.15568	8.26182	8.57366	7.78087	3.51834	4.26994	4.52949	9.82537	10.3068	11.5219	14.6439	7.0276	11.2819	5.83431
ENSG00000009954	BAZ1B	840.905	842.566	827.08	718.346	772.565	811.679	1027.71	992.527	1005.9	1052.28	997.94	1013.66	925.153	956.785	877.636	855.714	980.966	936.339	1048.85	1016.38	1078.96	1065.35	996.488	1038.22	1094.58	1086.9	1133.92	822.231	854.199	880.98
ENSG00000010017	RANBP9	377.144	361.778	344.535	371.026	367.968	432.975	267.7	259.797	273.472	280.627	245.067	259.087	228.323	247.349	297.797	266.655	247.204	233.787	245.69	274.345	280.372	276.626	204.281	283.322	394.542	395.577	354.224	433.937	467.001	462.209
ENSG00000010072	SPRTN	78.9372	120.049	78.4295	103.145	88.4238	72.9075	79.49	54.8737	102.862	83.6957	118.451	103.093	82.5218	82.6211	97.2887	81.6949	107.951	76.6324	88.6759	78.9622	85.1951	107.965	63.88	55.8533	134.476	110.303	136.529	103.691	125.524	120.408
ENSG00000010165	EEF1AKNMT	165.325	164.511	202.817	209.808	186.715	200.403	348.093	401.787	340.574	368.351	350.933	353.354	365.598	299.055	334.986	356.875	306.061	366.274	368.667	376.399	378.809	304.233	416.713	401.749	218.505	241	227.468	182.718	140.218	158.693
ENSG00000010219	DYRK4	27.8046	28.9006	22.5855	14.9863	17.7451	19.1339	12.6757	12.4585	10.5441	17.2328	12.8266	11.6	17.7977	13.5714	8.65275	13.8018	15.7978	25.7034	16.1947	21.0675	10.555	18.1473	10.8389	10.9171	19.5829	18.243	16.1082	18.621	25.7872	25.6709
ENSG00000010244	ZNF207	1155.74	1284.97	1123.37	1330.78	1223.79	1190.33	1804.77	1597.72	1766.13	1874.04	1856.81	1788.13	1806.42	1719.55	1935.74	1666.08	1790.59	1610.13	1733.76	1602.86	1682.94	1611.9	1414.66	1529.49	1539.84	1541.04	1612.76	1452.69	1371.56	1414.24
ENSG00000010256	UQCRC1	496.726	511.319	549.729	632.422	595.322	534.742	632.809	686.256	560.944	568.682	634.706	569.293	561.096	564.987	595.804	646.713	578.116	598.523	607.777	636.085	682.558	597.792	760.955	634.283	496.788	556.892	556.955	599.353	630.979	554.259
ENSG00000010270	STARD3NL	235.964	291.23	214.562	246.775	211.068	235.649	239.863	234.636	255.167	250.953	251.612	210.585	222.437	222.398	236.096	239.56	210.581	242.347	249.589	257.741	224.001	265.804	285.358	286.027	242.21	249.641	230.396	296.164	297.358	297.549
ENSG00000010278	CD9	296.082	397.939	338.331	352.678	401.166	336.354	440.723	465.117	383.804	380.199	392.553	403.324	377.912	377.604	362.179	402.224	375.383	336.899	291.505	291.782	342.452	342.663	469.557	326.421	459.684	451.275	426.136	607.385	580.211	604.435
ENSG00000010292	NCAPD2	619.674	591.703	734.69	821.238	830.486	786.193	856.856	942.192	701.341	768.413	693.3	812.451	722.557	772.633	702.503	683.577	745.905	753.108	903.275	884.613	918.439	838.387	1161.48	1027.42	815.651	851.693	848.366	665.385	680.107	664.061
ENSG00000010295	IFFO1	35.3194	44.4625	52.85	53.9507	46.0021	49.3453	45.8274	56.0633	46.3939	52.7755	44.4578	37.477	37.7143	48.2651	45.736	65.0656	41.8545	60.5867	51.442	49.603	52.7751	35.227	60.3932	62.2274	30.9204	37.4462	42.4672	53.209	36.2632	53.6756
ENSG00000010318	PHF7	29.3076	15.5619	24.3923	26.9754	35.1781	33.2326	15.6008	17.6496	14.7617	16.1558	16.0805	16.0616	12.3149	17.9811	11.125	6.90089	7.84773	11.0158	7.62103	12.6439	15.2461	8.53989	13.5885	24.0176	6.18409	7.68127	6.8338	17.067	9.67018	22.1704
ENSG00000010319	SEMA3G	11.2722	15.5619	18.5201	20.9808	12.177	10.0705	13.6507	15.5731	6.32644	19.3869	16.0805	17.8462	16.9329	13.2492	16.0694	14.7876	5.23182	11.9337	17.1473	8.75348	14.0734	12.8098	19.6278	14.1922	8.24545	11.5219	12.2032	3.01183	4.02924	1.16686
ENSG00000010322	NISCH	323.886	304.568	347.364	350.68	365.987	333.333	374.42	401.788	274.146	326.346	300.799	364.956	337.889	360.569	316.444	380.535	387.154	352.504	373.431	348.194	391.709	367.215	455.968	419.217	337.033	387.904	391.48	506.992	488.345	465.577
ENSG00000010361	FUZ	48.8177	49.0727	42.8416	43.2299	53.4244	58.5036	53.1447	68.5523	35.2421	45.1035	61.4098	53.0885	36.7802	64.5329	34.8882	41.7719	27.8478	41.9849	45.0629	45.3586	45.1841	55.032	68.1026	53.9177	35.6579	41.5861	38.2036	32.848	27.4065	35.9835
ENSG00000010404	IDS	236.944	237.599	192.381	249.028	257.206	258.737	210.444	221.136	239.26	176.509	185.72	196.713	188.653	222.152	195.095	162.879	207.748	173.811	170.514	155.436	188.808	207.577	121.641	159.79	167.636	176.703	186.459	163.35	159.035	205.405
ENSG00000010539	ZNF200	61.6211	75.5863	60.5291	65.8808	80.5037	73.5145	88.7297	100.706	85.4069	81.8558	92.6993	80.3079	80.0466	95.5839	86.5275	92.6692	91.5568	85.3722	87.6419	79.7539	93.8224	96.0737	93.6095	101.529	107.191	101.777	101.043	59.2326	60.4386	77.0128
ENSG00000010610	CD4	27.8046	20.0081	31.168	20.9808	25.0306	22.155	10.7256	23.8788	15.8161	15.0787	14.1887	12.4923	16.1633	15.142	16.0694	10.8443	11.7716	17.4416	10.4789	9.72609	12.9006	3.20246	4.52949	9.82537	5.15341	5.76095	1.46439	7.0276	8.05849	5.83431
ENSG00000010671	BTK	2.25443	6.66938	3.16197	7.9927	2.70601	8.05638	2.92516	1.03821	2.10881	2.1541	0.945911	3.56924	3.07871	8.51737	2.47221	4.92921	2.61591	0.91798	1.90526	0.972609	4.69112	1.06749	0	0	1.03068	5.76095	0.976257	69.272	67.6913	68.8448
ENSG00000010704	HFE	9.01772	8.8925	14.003	7.9927	12.8535	9.06343	7.80042	6.22926	6.32644	6.4623	3.78364	7.13848	5.38775	7.571	8.65275	2.95753	7.84773	6.42586	6.6684	2.91783	4.69112	4.26994	4.52949	7.64196	5.15341	8.64143	6.8338	51.2011	41.0983	37.3395
ENSG00000010803	SCMH1	76.6506	64.4706	67.7345	57.9471	54.7966	77.5426	46.751	38.4137	48.5027	45.2361	51.0792	45.5078	48.4898	48.2651	50.6804	37.462	45.7784	40.3911	36.1999	40.8496	32.8378	21.3497	30.1966	36.0264	34.9203	40.3267	47.8366	70.276	86.2258	78.1797
ENSG00000010810	FYN	357.703	317.907	332.458	283.741	324.721	369.586	264.239	311.463	246.731	249.876	282.827	285.539	244.758	285.805	294.193	243.503	218.428	243.265	255.305	239.262	252.148	216.7	241.573	242.359	248.394	251.562	250.41	185.729	178.898	203.034
ENSG00000010818	HIVEP2	104.455	55.3328	96.6369	115.894	102.152	95.4233	73.8245	58.1397	52.7203	58.0676	41.6201	41.9386	54.6472	63.4071	66.7498	37.462	51.0102	52.3249	58.1104	51.5483	58.639	49.1043	34.7261	41.4849	72.1477	75.8526	74.1261	83.3272	86.2259	99.7308
ENSG00000011007	ELOA	315.886	271.233	327.186	246.352	274.358	276.17	431.575	501.489	408.002	431.186	420.957	387.734	413.704	418.179	410.629	417.01	428.607	447.856	449.643	472.668	450.978	402.437	498.238	475.283	345.278	375.354	374.901	257.565	261.423	241.54
ENSG00000011009	LYPLA2	136.769	155.619	161.359	153.213	172.508	127.895	252.295	271.663	224.589	222.949	226.073	250.827	266.016	230.916	255.027	229.701	240.183	261.624	242.823	249.96	232.772	251.51	276.685	316.327	240.32	223.129	207.199	219.667	226.836	235.429
ENSG00000011021	CLCN6	75.1476	62.2475	76.339	80.9261	79.8271	71.6942	105.545	97.5916	80.1349	120.63	99.3206	129.12	103.368	115.457	98.8886	109.398	108.56	114.748	159.089	155.617	161.844	105.681	140.414	98.7284	120.59	106.578	133.259	126.497	116.042	143.524
ENSG00000011028	MRC2	179.325	131.164	151.631	136.343	132.56	143.898	92.7313	103.482	76.9717	61.3919	69.0036	85.6618	80.7939	100.316	74.866	80.839	122.232	91.7441	118.056	126.364	147.332	226.658	285.675	253.89	340.478	361.734	362.889	304.734	263.858	240.014
ENSG00000011052	NME1-NME2	0.00357869	0.000180556	0.0282545	0.410356	8.95079	6.77344	18.6075	0.451307	0.0323561	7.97179	7.9111	13.596	0.652243	10.3135	0.119273	21.8077	0.0566532	0.10703	0.0235348	1.22035	8.04564	0.389509	9.46557	0.366725	7.0222	10.0085	12.9948	0.114535	0.178687	8.3005
ENSG00000011105	TSPAN9	147.289	146.726	178.877	149.863	174.538	165.156	135.532	147.426	121.257	108.782	113.509	116	121.609	111.672	106.305	137.032	130.795	122.091	154.326	145.891	145.425	117.423	149.473	141.922	105.13	103.697	109.829	107.422	110.401	85.1809
ENSG00000011114	BTBD7	213.419	260.106	189.266	190.826	203.627	206.445	312.991	284.469	346.9	290.803	310.259	289.108	280.163	350.159	285.541	277.021	343.992	346.997	365.81	362.783	349.489	376.822	234.024	287.12	695.71	609.7	655.066	641.52	617.282	583.431
ENSG00000011132	APBA3	60.8696	68.9169	59.6257	57.9471	52.7671	37.2607	51.6778	45.6812	45.3395	44.159	46.3496	49.0771	40.0233	37.855	40.7915	38.4478	52.3182	49.5709	47.6314	56.4113	37.529	49.1043	72.4718	68.7776	62.8522	48.0079	51.2535	68.2681	59.3025	63.0105
ENSG00000011143	MKS1	74.3962	71.14	76.3389	72.9334	69.0032	87.6131	57.5281	55.0251	41.1219	49.5443	50.1333	58.0002	53.8775	70.0317	51.9165	73.9381	74.5534	72.5204	95.2629	92.3978	66.8485	65.1166	70.962	75.3279	51.5341	60.49	56.1348	75.2957	74.9439	67.6779
ENSG00000011198	ABHD5	122.491	126.718	117.749	87.9197	115.005	106.747	118.956	96.5535	145.508	156.172	186.344	145.447	180.105	152.366	166.874	209.985	228.892	223.987	270.547	249.96	252.148	260.466	178.16	188.866	243.241	265.964	241.136	168.662	148.276	159.86
ENSG00000011201	ANOS1	946.86	1347.21	903.87	1261.85	1204.17	997.984	1170.06	663.416	1580.55	1395.86	1431.16	1281.36	1291.52	1061.83	1342.41	952.323	1151	821.592	527.757	489.222	438.62	376.822	166.081	159.389	65.9636	55.6892	65.8974	67.2642	50.7685	82.8471
ENSG00000011243	AKAP8L	327.492	252.349	309.094	366.476	335.577	381.603	211.243	285.812	181.639	227.727	216.404	210.745	223.962	236.969	215.941	222.324	221.557	232.612	244.132	225.508	230.199	193.06	290.482	288.335	224.184	217.432	236.248	249.972	331.613	276.137
ENSG00000011258	MBTD1	795.812	915.928	723.638	755.31	780.009	734.138	689.361	309.386	870.939	739.931	842.803	760.25	715.801	666.248	754.023	626.996	763.844	578.327	557.289	491.167	499.604	724.823	157.022	239.084	586.459	662.51	643.359	590.317	589.076	553.093
ENSG00000011260	UTP18	436.595	437.956	416.464	419.617	425.519	430.971	531.403	485.882	561.999	514.831	518.334	536.279	501.061	451.378	499.387	497.85	494.407	501.217	478.22	489.222	472.63	443.007	306.496	418.09	334.971	346.617	391.967	249.982	255.454	218.203
ENSG00000011275	RNF216	217.751	166.018	226.893	192.256	198.892	205.46	221.755	242.127	200.377	211.59	180.758	214.318	220.044	201.401	216.319	195.008	201.203	214.836	214.242	199.385	213.566	201.097	271.018	270.663	189.053	213.273	188.483	208.291	193.654	197.039
ENSG00000011295	TTC19	560.409	537.997	528	503.541	521.558	495.466	443.649	464.913	429.738	477.133	440.794	479.892	438.293	432.495	438.398	493.908	459.093	483.458	413.441	407.523	482.013	383.228	422.752	407.753	307.538	310.596	297.758	277.114	283.333	346.464
ENSG00000011304	PTBP1	1880.91	2254.25	2026.78	2133	2080.21	2010.03	2946.55	3235.02	2700.3	2980.04	2910.5	2974.01	2861.62	3088.72	2938.21	2829.33	3158.61	3019.17	3212.17	3288.33	3294.22	2869.41	4102.19	3766.37	2978.66	3012	2961.46	2249.83	2185.46	2378.01
ENSG00000011332	DPF1	49.5975	28.9006	39.2987	21.9799	23.0011	33.2326	33.1518	24.917	40.0675	57.0837	45.4037	44.6155	36.9446	42.5869	32.1388	32.5328	35.3148	45.899	35.2473	22.37	30.4923	14.9448	25.6671	40.3932	30.9204	22.0836	25.3827	2.00789	8.05848	4.66744
ENSG00000011347	SYT7	57.1122	64.4706	71.3702	67.9379	76.4447	75.5285	61.4283	69.56	62.21	36.6197	43.5119	41.9386	47.7201	78.5492	35.8471	43.377	44.4705	48.6529	75.2577	75.8634	64.5029	137.706	166.081	144.105	616.347	542.489	601.865	641.519	630.173	619.602
ENSG00000011376	LARS2	185.615	180.073	221.789	256.765	225.275	209.466	317.867	384.137	273.091	281.11	311.205	329.263	310.95	310.411	341.166	277.022	253.743	287.328	334.373	370.564	348.316	337.325	375.948	368.998	225.719	232.358	226.98	176.694	133.771	129.522
ENSG00000011405	PIK3C2A	1080.62	1260.51	1068.74	1153.95	1100.67	1044.31	538.229	387.252	1229.44	1286	1586.29	1060.96	1392.35	921.771	1462.32	1015.42	1506.76	793.135	786.87	547.579	480.84	1243.62	270.26	283.844	1516.13	1388.39	1424.84	1390.46	1274.05	1414.24
ENSG00000011422	PLAUR	21.7928	17.785	23.9406	27.9744	28.4131	19.1339	29.2516	29.0699	27.4146	22.618	34.9987	17.8462	33.8659	19.8739	22.2499	13.8018	23.5432	20.1956	15.2421	7.78087	14.0734	18.1473	15.0983	28.3844	20.6136	13.4422	21.4777	13.0513	4.83509	4.66744
ENSG00000011426	ANLN	505.744	562.451	498.689	616.438	585.851	487.411	451.449	209.718	646.352	645.153	730.243	631.754	638.836	659.625	668.735	526.437	622.585	503.971	578.246	570.92	436.274	659.706	176.65	161.573	1120.35	1033.13	1065.1	983.863	1003.28	973.163
ENSG00000011451	WIZ	204.401	200.081	217.724	203.814	211.745	198.388	249.613	246.056	207.718	230.489	208.1	237.355	230.134	244.165	233.624	211.956	282.518	227.659	300.079	261.632	281.467	244.454	292.907	283.844	243.241	256.362	253.339	306.203	294.94	326.721
ENSG00000011454	RABGAP1	201.395	153.396	187.46	209.808	195.509	205.437	166.734	174.419	165.542	176.636	163.642	164.185	154.705	165.616	143.388	139.99	146.491	157.892	185.763	190.631	185.299	177.203	141.924	156.114	250.455	243.881	222.099	258.013	240.143	227.538
ENSG00000011478	QPCTL	27.8046	53.355	32.0714	41.9617	31.1191	28.1973	39.9771	53.9869	29.5234	31.2344	25.5396	41.0463	34.6355	32.1768	46.9721	31.5469	32.6989	38.5552	30.4841	26.2604	24.6284	28.8221	34.7261	43.6683	23.7057	22.0836	28.3115	19.0749	24.1755	24.5041
ENSG00000011485	PPP5C	299.839	200.081	327.942	316.711	371.399	330.312	370.52	415.284	293.595	357.58	347.149	356.924	380.221	349.35	328.804	350.96	389.77	386.47	420.043	439.619	443.311	376.822	526.932	484.718	375.168	343.737	336.321	240.946	270.007	273.046
ENSG00000011523	CEP68	280.473	316.129	248.262	276.747	279.395	294.059	291.54	265.781	299.452	273.571	300.957	308.739	293.48	303.786	327.569	278.007	279.903	312.396	202.91	227.591	214.619	203.89	158.532	203.058	131.927	148.91	147.458	74.523	72.5264	109.816
ENSG00000011566	MAP4K3	384.758	462.41	321.619	395.64	408.607	398.791	356.87	194.145	517.714	514.83	449.307	456.863	491.826	453.314	536.472	481.092	503.562	420.435	426.777	353.057	283.813	450.479	123.806	159.39	456.594	425.349	469.09	392.542	377.943	378.063
ENSG00000011638	TMEM159	80.408	64.4706	65.0462	78.9279	73.0622	61.4299	79.9543	85.1332	79.0805	58.1607	59.5924	61.5694	73.1195	67.1926	53.1526	64.0797	52.3182	71.6024	56.2051	62.247	60.9846	78.9939	93.6095	101.529	103.068	114.259	97.1376	108.426	101.537	99.1832
ENSG00000011677	GABRA3	35.3194	35.57	36.5885	31.9708	44.6491	38.2678	56.553	65.4072	46.3939	45.2361	45.4037	58.0002	47.7201	56.7825	44.4999	44.3629	39.2386	36.7192	50.4893	55.4387	56.2934	59.7792	73.9817	57.8606	27.8284	41.2868	27.8233	29.1143	13.6994	14.0023
ENSG00000012048	BRCA1	438.862	362.369	363.175	349.68	363.281	470.291	264.239	122.509	364.825	350.041	373.635	337.294	354.052	349.212	352.29	306.597	362.303	320.375	351.521	311.235	259.184	402.442	154.003	140.83	383.413	422.47	389.702	246.97	200.656	219.37
ENSG00000012061	ERCC1	116.68	126.102	126.196	107.813	129.287	110.091	127.677	117.199	112.046	145.499	145.802	137.976	112.183	118.128	115.228	139.121	113.053	134.788	137.202	126.217	150.525	103.802	142.903	149.604	132.562	121.47	118.266	160.457	162.967	159.626
ENSG00000012171	SEMA3B	13.5266	28.9006	18.0684	18.9827	17.589	15.1057	7.80042	6.22926	7.38085	11.8476	8.5132	8.0308	7.69679	19.8739	13.5972	18.731	14.3875	10.0978	7.62103	7.78087	4.69112	7.4724	15.0983	4.36683	18.5523	21.1235	18.5489	18.071	12.0877	14.0023
ENSG00000012174	MBTPS2	200.644	251.213	190.17	178.837	184.758	201.409	88.7405	48.7958	119.148	78.6202	98.3747	90.1234	102.039	96.5302	89.0002	95.6267	96.7886	90.88	84.784	80.7265	82.0946	93.9387	27.1769	57.8605	85.5466	101.777	118.127	200.789	203.88	206.534
ENSG00000012211	PRICKLE3	12.7761	4.44625	15.1026	24.4481	27.1645	15.7126	30.834	33.672	17.2224	16.1557	12.7861	15.2321	15.8787	13.3215	12.3611	11.2805	10.4636	7.34384	11.1455	17.1857	16.9071	23.4847	31.7063	26.5199	47.4113	45.0512	57.2237	43.1246	48.9591	37.4552
ENSG00000012232	EXTL3	319.378	357.923	381.697	420.616	405.901	340.382	569.432	675.871	507.17	471.749	505.115	539.848	475.66	501.578	498.151	451.515	410.697	433.286	463.932	487.277	464.42	476.099	603.933	552.405	261.793	298.609	270.423	225.887	195.015	200.7
ENSG00000012660	ELOVL5	909.283	1136.02	1041.19	1303.81	1248.85	1080.56	1322.17	1257.28	1395	1185.84	1182.38	1204.62	1091.41	1094.96	1241.06	1165.26	1185.01	1243.88	1071.71	1099.05	1196.24	919.102	859.088	975.992	790.537	835.33	799.569	913.595	945.26	994.171
ENSG00000012779	ALOX5	6.01181	8.8925	6.77565	9.99087	6.76502	9.06343	3.90021	3.11463	3.16322	1.07705	0	5.35386	3.84839	1.89275	3.70832	9.85842	1.30795	6.42586	22.8631	17.507	17.5917	48.0368	49.8244	42.5766	45.35	42.247	45.396	11.0434	8.86433	4.66744
ENSG00000012822	CALCOCO1	39.8283	33.3469	38.3953	42.9608	41.2666	39.2748	27.3015	29.0699	16.8705	29.0803	30.2691	25.877	26.9388	40.6941	22.2499	33.5186	17.0034	25.7034	32.3894	38.9043	36.3562	25.6197	58.8834	36.0264	48.442	68.1713	52.2298	157.619	168.422	169.195
ENSG00000012963	UBR7	258.508	286.783	266.057	272.751	281.425	275.931	283.74	290.699	288.907	292.958	321.61	257.878	286.321	272.556	275.652	328.285	302.137	345.161	339.136	311.235	357.698	394.97	375.948	401.749	348.371	388.864	398.802	294.155	271.571	242.707
ENSG00000012983	MAP4K5	253.248	333.469	233.986	255.766	218.51	238.67	175.509	79.9421	263.601	248.799	267.693	203.447	258.612	229.969	281.832	262.234	317.833	222.151	195.289	179.933	166.535	229.51	55.8637	74.2361	279.315	265.003	273.353	339.333	287.688	315.052
ENSG00000013016	EHD3	72.1418	73.3631	86.2766	81.9252	79.8272	66.4651	89.7048	95.5153	84.3525	73.2394	69.9974	82.0926	63.8833	82.3346	87.7636	55.2071	69.3216	55.0788	78.1156	98.2335	66.8485	75.7915	117.767	97.162	50.5034	72.972	77.1243	67.2642	78.9732	77.0128
ENSG00000013275	PSMC4	356.199	384.601	341.493	335.694	332.162	322.256	392.945	428.781	337.41	387.738	384.04	385.478	390.998	399.37	415.332	470.247	430.317	432.369	458.215	551.47	467.94	453.681	569.206	505.461	391.659	399.426	414.909	329.293	343.291	320.887
ENSG00000013288	MAN2B2	26.3017	22.2313	27.1026	33.969	24.3541	19.1339	32.1767	22.8406	18.9793	23.6951	22.7019	31.2309	21.551	30.284	21.0138	21.6885	23.5432	21.1135	16.1947	18.4796	23.4556	24.5522	25.6671	25.1093	47.4113	48.0079	44.9078	105.414	103.149	113.186
ENSG00000013297	CLDN11	38.3253	24.4544	29.7981	41.9616	46.6786	42.296	41.9272	49.834	46.3938	24.7721	23.6478	23.2	22.3207	25.5521	33.3749	18.731	27.467	24.7854	14.2894	19.4522	15.244	4.26991	7.54914	15.2839	9.27613	2.88048	3.90503	4.01577	4.83509	3.50058
ENSG00000013306	SLC25A39	417.069	362.369	481.523	477.564	499.258	478.347	457.299	533.639	437.579	441.591	433.227	445.263	425.632	456.153	472.193	489.963	469.556	525.084	515.372	544.661	539.479	504.921	573.736	611.357	426.703	488.721	440.292	389.53	406.953	406.068
ENSG00000013364	MVP	19.5384	11.1156	14.9064	15.9854	15.5595	10.0705	2.92516	2.07642	0	2.1541	2.83773	3.56924	2.30904	0	3.70832	1.97352	2.61591	0	0	0	1.17278	4.26994	1.50983	1.09171	5.15341	0	3.4169	6.02366	6.45247	5.83431
ENSG00000013374	NUB1	256.018	215.643	232.336	203.183	208.28	231.621	212.417	211.795	200.084	182.988	211.422	179.354	216.04	203.368	182.909	182.193	205.029	231.639	242.823	227.466	256.839	233.599	215.866	247.665	191.413	212.102	211.769	210.988	202.555	228.757
ENSG00000013375	PGM3	310.495	390.769	320.623	354.231	380.695	307.288	336.82	161.841	397.176	365.192	393.636	386.346	386.224	399.865	415.565	358.47	414.318	371.552	389.234	431.943	362.248	450.726	160.898	205.072	503.625	561.883	533.919	723.449	631.225	586.006
ENSG00000013392	RWDD2A	48.0945	40.0163	57.8188	62.9425	60.2086	58.4087	37.052	24.917	47.4483	40.9279	44.4578	35.6924	32.3265	39.7477	35.8471	43.377	44.4704	49.5709	48.5841	37.9317	37.529	60.8467	42.2753	39.3015	52.5648	50.8884	47.3485	73.2878	70.9147	81.6803
ENSG00000013441	CLK1	257.757	253.436	207.786	193.823	197.539	195.367	188.185	131.853	231.969	132.477	171.21	126.708	178.565	191.168	206.43	280.965	282.518	236.839	293.41	283.029	238.074	259.399	83.0407	108.079	330.849	343.737	337.785	570.24	579.404	575.262
ENSG00000013503	POLR3B	142.029	124.495	132.803	121.889	115.682	112.789	155.033	141.197	136.019	164.789	187.291	159.723	169.329	135.332	150.805	139.004	158.262	158.811	199.099	176.003	198.2	155.853	140.414	149.564	147.387	134.422	130.818	90.3549	83.8083	96.8495
ENSG00000013523	ANGEL1	161.422	149.726	150.289	142.844	149.021	169.027	166.723	182.142	155.054	166.918	139.684	161.067	152.965	144.596	152.57	130.32	140.57	129.547	140.139	146.554	147.722	135.826	169.496	154.923	108.676	120.709	96.5576	106.434	101.575	94.3602
ENSG00000013561	RNF14	136.017	124.495	121.058	129.881	160.331	139.979	115.056	126.661	124.42	115.244	118.239	131.17	97.7492	121.136	119.902	179.423	133.411	134.943	153.373	174.097	184.127	144.111	164.571	143.014	182.431	147.864	169.381	216.852	239.301	229.872
ENSG00000013563	DNASE1L1	45.6581	45.729	49.2363	43.3014	48.2933	42.296	46.7456	30.6255	36.0086	33.3836	41.9293	31.301	38.5839	42.4216	33.1777	42.2692	27.665	39.4731	26.0271	34.6889	40.6738	28.6173	54.2334	33.716	27.8284	38.4063	33.4356	68.2434	54.6094	70.6194
ENSG00000013573	DDX11	328.611	328.04	349.266	350.74	311.415	338.55	269.11	291.556	248.728	294.219	294.71	293.21	293.592	301.78	247.867	330.058	289.666	307.66	311.388	336.996	345.489	278.279	355.57	334.771	269.541	264.74	241.748	177.029	152.106	181.267
ENSG00000013583	HEBP1	135.266	140.057	140.482	124.886	133.947	132.93	104.331	130.814	124.42	107.705	97.4288	92.8003	93.9008	104.101	106.305	103.513	74.5534	127.599	88.5944	110.877	129.006	132.368	123.806	129.913	158.725	164.187	147.903	365.436	344.098	359.458
ENSG00000013588	GPRC5A	3.00591	0	1.80684	0.999087	1.353	2.01409	6.82536	1.03821	1.05441	0	0.945911	3.56924	3.07871	4.73187	2.47221	1.97168	3.92386	3.67192	5.71577	0.972609	1.17278	9.60737	6.03932	7.64196	26.7977	26.8844	38.5622	48.1893	61.2445	63.0105
ENSG00000013810	TACC3	522.467	624.698	581.438	564.485	572.723	536.943	720.564	742.319	629.889	660.232	678.218	684.403	684.244	708.834	645.247	736.424	749.458	772.021	778.3	753.773	793.973	780.331	1002.53	962.886	667.881	677.872	719.502	490.23	483.676	515.752
ENSG00000014123	UFL1	324.638	300.122	250.699	246.775	271.277	299.093	82.8794	36.3373	156.052	193.869	169.318	156.154	156.245	170.347	149.569	201.112	219.736	138.615	160.994	143.946	110.241	176.135	34.7261	42.5766	220.566	245.801	237.23	518.034	514.937	472.579
ENSG00000014138	POLA2	122.83	115.659	117.283	102.599	110.482	123.966	110.4	117.9	92.6747	97.4163	98.7807	107.301	122.776	89.2157	108.493	114.423	57.1349	95.5016	107.95	97.4968	124.305	85.8738	156.103	103.157	138.302	133.454	130.195	78.3173	91.6459	100.838
ENSG00000014164	ZC3H3	79.6565	68.9169	80.856	83.9233	86.5922	77.5426	89.7048	115.241	73.8085	100.166	67.1597	92.8003	93.9008	102.208	85.2914	76.8957	100.712	76.1923	66.684	92.3978	76.2307	81.1289	135.885	100.437	72.1477	106.578	98.602	88.347	92.6726	96.8495
ENSG00000014216	CAPN1	284.058	289.006	319.81	354.676	334.078	320.241	405.622	498.341	354.281	408.202	439.849	440.582	387.149	409.781	410.388	450.53	409.39	518.659	416.299	427.947	419.855	364.013	460.498	463.976	342.186	353.338	392.455	562.208	595.522	567.095
ENSG00000014257	ACP3	4.50886	4.44625	4.96881	8.99179	5.41201	6.04228	5.85031	6.22926	5.27203	3.23115	13.2428	0.89231	5.38775	82.3346	4.94443	4.92921	2.61591	5.50788	7.62103	6.80826	11.7278	3.20246	4.52949	9.82537	32.9818	30.7251	27.3352	1001.94	959.765	929.988
ENSG00000014641	MDH1	920.56	1013.74	976.157	893.184	999.877	900.3	1188.59	1118.15	1213.62	1241.84	1347.92	1240.31	1169.9	1111.99	1185.42	1302.3	1171.93	1297.11	1213.6	1193.19	1236.11	1286.13	1075	1150.67	1205.9	1248.2	1252.54	1065.19	1044.38	1008.17
ENSG00000014824	SLC30A9	815.351	975.954	732.672	799.269	842.92	781.47	597.706	343.647	799.239	760.397	813.485	707.602	722.729	690.854	757.734	667.415	710.219	686.65	585.866	582.594	600.463	580.712	184.199	290.394	587.487	621.222	620.412	681.678	696.256	659.278
ENSG00000014914	MTMR11	9.7692	11.1156	9.93761	11.989	11.5005	12.0846	4.87526	3.11463	11.5985	10.7705	6.62137	8.03079	8.46647	8.51737	12.3611	10.8443	3.92386	4.5899	11.4315	8.75348	7.03668	20.2822	7.54915	9.82537	9.27613	10.5617	13.1795	32.1262	37.8749	36.1727
ENSG00000014919	COX15	199.851	218.3	211.57	222.531	237.603	227.17	242.945	260.22	269.119	223.81	242.304	222.483	232.373	229.629	230.724	202.721	219.863	223.841	217.783	230.759	227.846	202.781	252.075	240.975	198.331	182.969	190.514	224.712	227.535	225.212
ENSG00000015133	CCDC88C	297.858	251.213	300.604	268.274	281.961	271.903	245.762	272.011	256.188	229.987	233.355	256.922	256.034	252.476	250.849	345.749	380.614	366.325	268.612	278.411	271.376	284.148	338.523	317.207	269.558	228.628	274.593	193.258	218.315	235.779
ENSG00000015153	YAF2	11.2722	13.3388	8.58249	18.9827	17.589	16.1128	9.75052	5.19105	8.43525	7.53935	9.45911	7.13848	13.0845	16.0884	18.5416	19.7168	40.5466	22.9495	22.8631	17.507	11.7278	37.362	9.05898	20.7425	78.3318	86.4143	85.9106	77.3036	78.1673	73.5122
ENSG00000015171	ZMYND11	331.402	351.254	289.094	300.725	273.983	305.135	295.441	207.642	298.397	318.807	344.311	295.355	319.416	339.749	286.777	391.379	409.39	422.271	408.678	367.646	368.253	365.08	185.709	313.32	473.083	442.632	452.984	465.83	427.906	444.574
ENSG00000015475	BID	141.278	137.834	137.32	125.885	136.653	151.057	209.636	220.1	212.99	220.795	232.694	220.401	223.977	192.114	197.777	212.942	244.588	236.839	190.526	196.467	212.273	182.54	274.789	229.259	185.523	177.629	166.94	63.2484	67.6913	66.5111
ENSG00000015479	MATR3	2981.86	3522.56	2549.48	3072.02	3001.55	2837.92	2297.02	1098.09	3467.05	3505.85	3977.31	3120.04	3111.55	2942.32	3498.91	3306	3853.75	3240.09	2752.11	2434.78	2371.82	3276.44	730.873	1014.29	3149.77	3186.38	3270.81	3050.32	3078.03	2904.88
ENSG00000015532	XYLT2	120.988	142.28	150.871	118.891	115.682	126.888	98.4802	128.738	99.1142	104.474	100.267	89.2311	85.4343	94.6375	82.8192	84.7824	66.7057	92.716	82.8787	89.48	105.55	74.724	134.375	96.0703	66.9943	66.2509	64.433	65.2563	83.8082	77.0128
ENSG00000015568	RGPD5	243.231	336.323	244.02	111.504	272.434	172.335	135.643	29.1562	187.769	166.435	207.846	112.837	273.88	234.414	302.211	951.925	982.459	912.754	907.892	774.208	784.177	1054.31	269.614	422.265	918.456	1275.21	1076.38	471.188	377.129	313.39
ENSG00000015676	NUDCD3	210.414	231.205	239.406	238.782	257.747	232.628	201.836	242.941	192.956	207.871	208.1	251.632	233.212	227.13	228.68	238.573	209.273	223.069	206.72	270.386	265.048	234.847	317.064	308.953	216.443	279.406	256.755	324.274	293.328	270.712
ENSG00000016082	ISL1	3.00591	0	1.80684	0.999087	0.676502	1.00705	0	3.11463	3.16322	2.1541	0	0.89231	3.07871	106.94	2.47221	1.97168	0	3.67192	3.81052	5.83565	9.38224	17.0798	21.1376	14.1922	810.116	685.553	783.933	1545.07	1500.49	1483.08
ENSG00000016391	CHDH	42.5152	82.2556	62.7489	70.8888	62.7784	41.2889	88.9928	93.7468	91.9983	82.1328	72.6417	78.9956	82.8984	85.1737	66.0468	62.8983	100.712	77.6699	53.4599	51.5482	78.4361	65.1166	99.6211	66.379	78.0555	65.2908	66.291	28.9675	32.8734	27.9169
ENSG00000016402	IL20RA	19.5384	20.0081	18.0684	14.9863	15.5595	16.1128	13.6507	13.4967	14.7617	9.69345	14.1887	14.277	8.46647	12.3029	16.0694	8.87258	3.92386	13.7697	6.6684	2.91783	7.03668	2.13497	3.01966	2.18342	1.03068	0.960159	0.976257	0	0	0
ENSG00000016864	GLT8D1	187.869	217.866	188.829	192.824	194.156	219.536	160.908	150.54	170.844	147.556	179.723	157.967	137.003	145.783	158.222	159.706	170.034	149.631	170.521	145.891	166.535	176.135	143.467	169.271	160.786	165.147	155.225	203.8	226.475	215.869
ENSG00000017260	ATP2C1	536.75	635.338	509.355	563.336	581.648	527.314	584.534	481.448	688.212	649.461	705.928	662.483	619.384	649.699	671.091	570.99	640.477	597.29	598.711	620.97	625.659	739.502	417.886	534.419	872.072	903.27	883.076	813.92	812.407	765.461
ENSG00000017427	IGF1	1.63907e-09	0	0	0	0	0	0.257379	0	0.711868	0	0	0	0	7.68169	0	0	0	0	0	0	0	0	0	0	11.8884	6.18139	13.8417	119.5	109.581	120.386
ENSG00000017483	SLC38A5	98.4434	75.5863	91.2453	85.9216	82.5332	106.747	122.857	141.197	104.386	114.167	113.509	126.708	110.834	110.726	137.208	117.315	105.944	111.076	106.694	123.521	103.205	97.1412	138.904	103.712	89.6693	94.0955	85.9107	13.0513	14.5053	29.1715
ENSG00000017797	RALBP1	488.424	562.451	497.324	457.583	506.702	472.261	551.817	612.464	614.721	536.356	546.72	561.253	552.51	554.566	484.554	436.713	517.92	526.003	682.036	652.516	720.061	744.02	849.901	851.501	824.497	952.405	937.183	1018.98	1042.69	1033.47
ENSG00000018189	RUFY3	202.821	266.775	203.721	238.772	213.098	197.774	187.185	150.54	211.936	197.1	196.978	188.278	178.565	202.524	208.831	204.001	204.041	191.858	199.998	192.518	187.645	210.295	113.237	135.372	216.443	227.558	261.519	316.242	282.853	303.313
ENSG00000018236	CNTN1	242.727	208.974	193.332	112.897	129.212	116.817	121.881	77.8657	169.76	137.862	145.67	155.262	152.396	120.19	159.458	147.876	162.186	116.583	101.931	121.576	104.377	118.491	33.2163	36.0264	57.7182	59.5298	53.6941	46.1814	52.3801	35.0058
ENSG00000018408	WWTR1	169.085	180.073	154.422	141.873	147.329	162.978	136.228	96.9054	139.438	127.032	111.032	120.466	125.883	141.853	116.194	127.174	160.76	134.652	109.552	106.014	92.6496	108.883	50.988	68.3507	257.781	276.551	246.087	545.139	588.441	626.481
ENSG00000018510	AGPS	670.353	764.755	589.49	618.509	637.941	617.32	668.886	427.75	857.232	750.703	739.702	708.494	681.166	631.232	708.289	639.811	740.302	613.211	630.64	608.853	602.808	633.03	215.907	263.102	573.06	592.417	524.74	519.039	488.344	488.915
ENSG00000018610	STEEP1	84.9169	68.1886	91.7636	64.9406	108.654	96.6764	120.661	175.044	144.029	151.039	121.076	120.06	132.434	144.502	119.515	152.974	126.562	155.707	130.8	130.991	143.925	139.96	176.582	187.344	104.51	116.844	118.798	98.6792	100.731	85.1809
ENSG00000018625	ATP1A2	304.348	335.692	355.947	414.622	428.224	397.771	290.565	258.514	210.881	200.331	217.56	210.585	156.245	162.777	179.236	127.174	130.796	123.927	110.505	121.576	109.069	112.086	138.904	120.088	23.7057	38.4063	29.7758	2.00789	1.6117	7.00117
ENSG00000018699	TTC27	166.076	164.511	171.198	170.844	179.95	166.163	160.884	174.419	169.76	219.718	187.29	170.431	204.735	165.616	166.874	157.735	133.411	190.022	189.573	203.275	187.645	164.393	163.062	196.507	131.927	122.9	125.449	89.3509	66.0796	73.5122
ENSG00000018869	ZNF582	25.3903	36.761	33.3484	37.1791	37.9704	39.4959	36.59	15.6056	22.6198	38.6253	34.5554	36.6029	41.049	48.1198	38.3967	61.9137	76.004	55.9105	48.0883	38.5016	34.0106	34.183	12.7793	15.6105	23.3969	26.5823	25.3436	19.8461	13.8775	13.4134
ENSG00000019144	PHLDB1	270.811	275.668	274.188	244.777	228.657	236.656	252.539	291.737	233.024	273.571	214.722	265.571	249.376	284.859	222.499	227.729	209.273	235.921	224.42	245.097	216.964	196.417	268.75	271.835	204.075	181.47	206.966	159.627	151.496	159.86
ENSG00000019485	PRDM11	57.1122	53.355	54.6569	59.9452	60.8852	74.5215	60.4532	62.2926	61.1556	65.7001	60.5383	64.2464	90.822	66.2462	58.097	70.9806	68.0136	65.1766	90.4998	81.6991	86.7857	93.9387	104.178	73.1445	89.6693	83.5338	97.1375	55.2169	64.4679	66.5111
ENSG00000019505	SYT13	139.775	135.611	142.723	145.867	152.889	121.853	146.258	191.031	143.399	133.554	122.022	118.677	115.452	119.243	119.902	131.117	116.408	106.486	97.1682	106.987	98.5135	132.368	135.885	162.665	63.9023	91.2151	77.6124	23.0907	21.7579	15.1692
ENSG00000019549	SNAI2	4.50886	2.22313	5.42052	4.99544	7.44152	6.04228	5.85031	3.11463	5.27203	8.6164	2.83773	3.56924	5.38775	35.0159	4.94443	3.94337	3.92386	6.42586	4.76315	0.972609	5.8639	4.26994	0	0	11.3375	5.76095	9.76257	309.214	326.369	351.225
ENSG00000019582	CD74	90.2546	48.9087	82.7246	99.9088	108.917	102.812	104.568	85.1331	92.7878	70.1026	51.1396	65.1387	67.0666	71.0362	67.9859	76.0705	41.8545	72.5685	75.2577	62.3268	76.2307	74.724	95.1193	89.5201	92.9143	81.721	89.8828	37.1982	38.6807	45.5076
ENSG00000019991	HGF	4.50886	4.44625	2.71026	3.99635	4.05901	2.01409	1.9501	0	3.16322	2.1541	0.945911	0.89231	0	5.67825	4.94443	0	1.30795	0.91798	0	0	1.17278	1.06749	1.50983	0	28.8591	17.2829	24.8946	29.1143	34.6515	39.6733
ENSG00000019995	ZRANB1	117.746	93.7187	127.63	131.339	113.214	107.825	126.198	94.7139	113.433	118.385	91.0473	118.969	110.111	111.268	107.247	103.592	90.6686	98.2553	118.222	117.942	128.679	114.933	101.85	96.8438	138.294	156.914	160.847	172.572	162.653	178.944
ENSG00000020129	NCDN	111.97	95.5944	126.027	138.345	129.212	121.853	224.262	242.941	205.609	253.107	247.828	257.878	294.567	235.648	264.527	265.191	257.667	321.294	314.368	303.454	321.342	236.982	309.515	323.146	168.001	170.908	169.869	68.2681	73.0264	73.5123
ENSG00000020181	ADGRA2	20.0527	10.3987	22.8776	8.75742	12.3103	10.7685	11.9473	14.9835	9.21107	13.6785	9.58398	12.2288	18.5902	8.10442	7.56588	18.0698	13.1412	19.4894	21.1415	5.82888	15.4456	5.44468	18.1589	5.73597	5.0911	4.91418	7.24258	37.087	29.2977	36.0065
ENSG00000020256	ZFP64	105.207	115.602	124.672	121.889	122.447	123.867	114.081	105.897	89.6246	109.859	99.3207	116	110.064	114.511	85.2914	71.9664	78.4772	89.0441	88.5945	89.48	99.6863	74.724	107.198	106.987	176.247	128.661	141.557	104.41	116.042	79.3465
ENSG00000020426	MNAT1	199.893	144.503	158.55	108.901	135.977	172.205	151.133	101.745	173.977	151.864	149.454	129.385	133.924	124.922	103.833	132.103	125.564	143.205	125.747	137.138	125.487	137.706	55.8637	79.6947	122.651	121.94	130.819	126.497	131.353	149.358
ENSG00000020577	SAMD4A	70.6388	71.14	62.7876	42.9607	48.0316	69.4863	20.4761	21.8024	17.9249	21.541	24.5937	16.0616	17.7026	18.9275	14.8333	34.5045	60.1659	43.1451	25.721	29.1783	17.5917	42.6994	52.8441	46.9435	27.8284	29.7649	24.8946	37.1459	37.069	40.8401
ENSG00000020633	RUNX3	3.75738	8.8925	0.903419	1.99817	2.70601	1.00705	2.92516	5.19105	0	3.23115	1.89182	4.46155	11.5452	11.3565	11.125	14.7876	22.2352	13.7697	14.2894	12.6439	12.9006	24.5522	30.1966	22.9259	50.5034	40.3267	50.7654	5.01971	4.83509	2.33372
ENSG00000020922	MRE11	236.715	271.221	253.409	270.728	259.08	300.1	189.16	122.509	261.493	258.492	295.124	256.985	238.6	236.594	255.874	270.121	287.75	233.167	233.394	222.727	193.509	275.411	69.4522	92.7952	386.484	422.47	377.324	290.14	315.893	301.05
ENSG00000021300	PLEKHB1	39.0768	35.57	39.7505	28.9735	20.295	32.2255	17.5509	20.7642	24.2513	14.0017	28.3773	25.877	20.0116	28.3912	14.8333	26.6177	23.5432	25.7034	26.6736	15.5617	25.8012	17.0798	24.1573	20.7425	17.5216	8.64143	11.227	11.0434	4.02924	9.33489
ENSG00000021355	SERPINB1	105.207	95.5944	106.604	104.904	84.5627	93.6554	51.6778	46.7194	48.5027	47.3902	34.0528	44.6155	45.411	63.4071	54.3887	67.0372	32.6989	59.6687	54.2999	59.3291	66.8485	67.2516	63.4129	65.5025	153.572	120.02	107.876	175.69	163.587	161.027
ENSG00000021574	SPAST	305.851	355.7	266.509	301.724	269.247	265.86	279.84	175.457	342.682	355.426	338.636	311.417	309.41	317.982	337.457	335.186	409.39	286.41	294.362	260.659	274.431	339.46	104.178	115.721	307.143	343.737	347.548	259.017	267.542	234.539
ENSG00000021645	NRXN3	12.0236	13.3388	12.6479	17.9836	11.5005	17.1198	18.526	21.8024	16.8705	21.541	22.7019	22.3078	36.9446	37.855	14.8333	18.731	20.9273	15.6057	18.1	18.4796	23.4556	26.6871	21.1376	32.7513	30.9204	27.8446	26.8471	134.528	142.635	103.851
ENSG00000021762	OSBPL5	24.7987	28.9006	26.6509	37.9653	33.1486	38.2678	30.2266	29.0699	25.3058	19.3869	16.0805	16.9539	18.4723	23.6594	24.7221	25.6319	20.9273	11.9337	29.5315	25.2878	12.9006	28.8221	57.3736	44.76	54.6261	43.2071	51.2535	137.54	128.13	144.691
ENSG00000021776	AQR	695.868	746.97	693.374	772.294	757.006	678.75	775.167	501.455	898.353	862.717	853.213	856.618	853.572	829.972	812.122	748.255	753.382	738.974	833.551	817.964	797.49	827.302	303.476	530.569	691.587	748.926	720.967	637.503	669.66	626.605
ENSG00000021826	CPS1	88.6742	71.14	86.7283	88.9188	99.4458	101.712	127.732	121.47	110.713	114.167	110.672	105.293	116.221	128.707	102.597	77.8815	74.5534	95.4699	93.3576	75.8635	100.859	91.8038	87.5702	120.088	87.6079	130.582	94.697	151.595	128.936	128.355
ENSG00000022267	FHL1	231.455	257.882	251.15	259.763	204.303	258.811	273.99	294.852	286.798	258.492	251.612	260.554	258.612	239.433	223.735	255.333	223.66	224.905	209.578	226.618	234.556	223.105	223.455	217.25	79.3625	94.0956	100.065	15.0591	12.8936	8.16803
ENSG00000022277	RTF2	162.319	142.28	180.232	192.824	197.539	185.297	203.786	208.68	170.814	187.407	194.858	189.17	170.099	184.543	192.833	224.772	173.958	205.627	202.91	214.947	258.011	175.068	320.084	264.193	232.934	230.438	226.004	257.009	250.619	261.377
ENSG00000022556	NLRP2	375.551	497.246	464.951	485.405	505.688	413.866	757.379	774.246	641.932	706.18	709.154	686.989	708.047	706.809	734.163	760.845	676.972	686.305	709.484	765.202	805.513	693.53	946.152	802.744	528.49	578.531	604.548	408.407	389.153	425.847
ENSG00000022567	SLC45A4	72.8932	100.041	93.9556	104.904	120.417	77.5426	156.983	184.801	164.487	161.558	156.075	165.97	176.256	146.688	156.986	126.188	141.259	147.795	145.752	134.22	144.252	112.086	172.121	160.481	140.173	123.86	135.212	127.501	110.401	116.686
ENSG00000022840	RNF10	495.974	497.98	520.821	575.475	576.38	567.975	563.579	647.843	543.02	497.597	456.874	577.325	578.799	554.575	529.053	517.567	575.5	542.526	522.994	548.551	546.515	602.062	718.68	660.483	522.555	575.135	586.731	483.901	481.897	568.261
ENSG00000022976	ZNF839	91.7439	82.5004	78.476	74.7388	79.543	60.4353	40.1333	44.0043	44.3026	32.1168	47.3001	48.9108	30.6346	40.5924	27.9406	33.1979	37.3791	44.2082	42.1128	52.2082	61.742	53.3076	37.7548	47.4204	48.8375	60.488	50.3628	72.5799	59.3386	73.2733
ENSG00000023041	ZDHHC6	214.922	297.899	189.768	219.799	203.012	195.37	300.404	257.476	263.602	298.343	331.069	321.232	294.189	296.601	267.56	304.848	308.677	278.262	343.946	331.805	324.86	298.896	255.161	269.75	317.475	286.127	321.828	284.116	270.911	297.55
ENSG00000023171	GRAMD1B	73.6447	64.4706	76.7907	68.937	75.7682	65.4581	108.231	113.165	68.5364	85.0869	65.2678	80.3079	73.8892	69.0854	75.4025	65.0656	56.242	89.0441	80.9735	68.0826	111.414	96.0737	138.904	112.446	68.025	52.8087	67.3617	41.1617	46.7392	57.1762
ENSG00000023191	RNH1	91.6802	104.487	91.2453	97.9106	87.2687	75.5285	136.507	130.814	110.713	110.936	123.914	108.862	108.525	102.208	127.319	129.145	146.491	133.107	160.042	124.494	117.278	121.693	138.904	161.573	140.173	135.382	139.605	142.56	145.859	129.522
ENSG00000023228	NDUFS1	583.925	537.015	543.408	520.862	522.945	486.404	567.511	556.4	583.087	552.53	578.952	533.649	521.863	558.396	552.163	535.161	480.019	530.618	561.147	556.36	572.753	577.528	545.027	535.004	527.709	540.569	560.442	503.026	543.735	546.091
ENSG00000023287	RB1CC1	915.299	1124.9	795.46	729.336	752.943	927.49	333.468	250.209	728.596	848.716	1014.96	713.849	839.717	680.444	833.136	609.248	915.569	537.017	513.467	371.537	309.614	836.909	238.553	232.534	1027.59	934.235	979.671	928.648	1069.36	1003.5
ENSG00000023318	ERP44	187.118	148.949	180.232	211.807	219.863	187.311	180.385	156.77	189.793	192.792	211.884	182.924	180.874	176.972	195.305	159.706	183.114	167.99	154.326	174.097	175.917	195.35	129.845	137.555	246.333	274.605	256.756	353.388	354.573	362.894
ENSG00000023330	ALAS1	205.153	164.511	227.211	187.829	221.892	234.642	181.36	180.648	133.91	146.479	153.238	140.985	137.772	136.278	140.916	144.919	132.103	156.975	172.426	198.412	188.818	183.607	211.376	211.791	136.05	164.187	143.998	128.505	129.742	140.023
ENSG00000023516	AKAP11	583.897	693.615	520.821	538.508	545.26	466.263	334.443	222.177	534.584	535.294	558.087	504.155	547.242	479.812	536.471	455.459	558.497	378.208	385.815	297.618	309.614	435.534	110.218	136.464	333.941	372.542	374.395	439.727	391.642	432.905
ENSG00000023572	GLRX2	131.233	137.216	125.993	135.994	117.998	134.034	85.9237	61.9249	148.116	141.945	108.641	101.093	105.03	91.3607	115.762	122.668	122.664	88.0962	85.1244	79.9808	72.2978	107.572	49.6255	46.1358	87.6056	119.805	99.2145	83.0321	87.4713	90.0266
ENSG00000023608	SNAPC1	232.804	257.883	184.165	151.379	114.199	153.968	45.8274	32.5554	66.3119	56.4594	73.684	51.1785	59.3051	64.1371	62.5175	39.2129	71.8863	55.9968	44.1253	46.5596	44.5656	67.2617	18.0818	35.9528	66.2215	65.9197	82.5741	111.669	111.657	96.0915
ENSG00000023697	DERA	123.994	93.3713	105.248	156.857	140.036	153.071	111.156	101.745	97.0055	112.013	111.617	114.216	100.828	106.94	106.305	106.471	99.4045	104.65	102.884	100.179	79.749	111.019	89.08	111.354	170.063	197.793	161.571	417.64	419.042	395.566
ENSG00000023734	STRAP	1443.75	1579.36	1358.8	1541.37	1537.98	1420.9	1630.39	1597.81	1749.3	1581.1	1644.16	1571.53	1537.05	1508.84	1567.23	1667.43	1646.5	1655.91	1492.85	1478.08	1513.32	1475.22	1290.19	1446.75	1348.31	1401.57	1401.29	1270.3	1353.45	1260.55
ENSG00000023892	DEF6	42.8342	33.3469	37.9436	38.9644	48.0316	46.3242	15.6008	26.9934	24.2513	16.1557	14.1887	16.9539	20.7813	17.0347	16.0694	16.7593	11.7716	15.6057	14.2894	29.1783	10.555	26.6871	22.6475	19.6507	37.1045	42.247	27.8233	44.1735	41.0983	28.0047
ENSG00000023902	PLEKHO1	68.3844	68.9169	85.8249	83.9233	85.9157	88.6202	112.131	106.936	93.8422	101.243	120.131	121.354	125.458	129.653	124.847	170.551	143.875	179.006	121.937	120.603	109.069	119.558	163.062	148.472	130.897	107.538	113.734	124.489	127.324	151.692
ENSG00000023909	GCLM	168.331	191.189	162.164	174.84	176.567	132.93	174.534	120.432	250.948	269.262	216.613	217.724	257.842	229.022	278.124	247.446	332.22	223.987	223.868	188.686	160.671	149.448	69.4522	86.245	205.106	166.107	218.194	584.296	572.96	596.266
ENSG00000024048	UBR2	261.513	282.337	218.177	212.806	210.392	219.536	245.713	183.763	244.623	278.955	254.451	267.694	252.454	256.467	273.18	217.871	218.428	220.315	256.258	251.905	275.602	257.263	108.708	179.04	338.063	292.848	344.619	325.278	317.504	351.225
ENSG00000024422	EHD2	51.1004	48.9088	45.6227	64.9407	48.7081	60.4229	32.1767	52.9487	32.6866	32.3115	14.1887	29.4462	26.9388	29.3376	25.9583	17.7452	23.5432	22.0315	20.0052	14.5891	16.4189	30.9571	22.6475	30.5678	34.0125	28.8048	28.7996	29.1143	37.8749	24.5041
ENSG00000024526	DEPDC1	732.678	861.338	636.899	650.043	677.052	668.268	216.186	150.128	381.954	409.447	482.502	333.342	427.49	301.741	448.384	326.738	403.711	275.178	280.176	187.68	187.307	481.081	134.375	131.766	756.468	730.716	751.684	768.22	836.63	755.402
ENSG00000024862	CCDC28A	38.3253	44.4625	47.8812	48.9553	46.0021	42.296	35.1019	35.2991	32.6866	28.0033	39.7282	21.4155	30.0175	34.0695	30.9027	28.5894	27.467	34.8832	27.6262	38.9043	37.529	49.1043	39.2556	57.8605	56.6875	49.9282	41.4909	55.2169	53.186	36.1727
ENSG00000025039	RRAGD	96.9405	77.8094	98.0211	88.9188	73.0622	69.4863	101.405	109.012	103.332	75.3935	88.9156	86.5541	103.907	91.7984	112.486	167.593	209.273	184.514	103.837	106.987	132.524	77.9265	80.021	60.044	36.0739	32.6454	29.2877	17.067	8.86433	8.16803
ENSG00000025156	HSF2	142.029	140.057	146.339	155.858	125.829	141.994	122.857	87.2096	146.562	117.398	125.806	104.4	98.5189	105.048	111.25	68.0231	60.1659	70.6845	53.3472	45.7126	52.7751	54.4418	28.6868	50.2186	102.037	83.5338	99.0901	170.67	123.295	159.86
ENSG00000025293	PHF20	408.052	453.518	395.247	433.604	413.343	372.607	519.703	436.048	461.83	418.972	414.309	421.17	397.154	440.065	406.679	310.54	272.055	318.539	344.852	322.906	364.734	431.264	309.515	346.072	364.861	427.27	383.181	402.581	401.313	418.903
ENSG00000025423	HSD17B6	15.0297	8.8925	14.5387	11.989	14.8892	12.0847	15.6009	14.535	15.8161	17.291	18.9182	16.0616	13.8661	16.1684	16.0694	22.6744	22.2352	16.5385	5.72306	12.644	19.9373	10.6749	18.1229	17.4944	9.31265	5.77066	10.7619	4.01577	3.22339	1.16686
ENSG00000025434	NR1H3	38.3253	26.6874	41.1056	31.9708	33.1486	49.3453	25.3514	23.8788	21.0881	21.541	24.5937	25.877	28.4781	28.3912	25.9583	32.5328	34.0068	25.7034	28.5789	37.9317	28.1467	34.2129	45.2949	39.3015	21.6443	41.5727	31.2402	38.1498	36.2632	40.8401
ENSG00000025770	NCAPH2	117.746	109.401	144.184	114.991	120.396	128.249	132.597	152.536	121.538	146.432	159.727	140.966	154.196	150.11	133.236	173.321	148.163	188.459	171.567	199.151	176.288	165.022	215.426	177.593	163.406	158.904	165.886	152.907	133.491	153.189
ENSG00000025772	TOMM34	143.532	168.958	173.005	191.825	177.92	167.17	192.085	230.483	157.107	168.02	157.967	171.324	194.729	151.42	135.972	180.409	156.955	184.514	170.521	173.124	184.126	141.976	202.317	149.564	127.805	135.382	121.056	206.812	199.045	232.205
ENSG00000025796	SEC63	977.524	920.764	864.747	809.559	846.159	899.517	663.212	433.402	759.755	779.881	737.027	723.23	738.602	600.185	694.06	635.384	672.005	640.393	566.887	506.998	513.169	652.417	291.564	318.178	549.891	603.391	591.501	704.678	707.945	648.894
ENSG00000025800	KPNA6	419.325	411.278	407.894	475.566	410.635	387.712	597.707	701.83	587.303	504.059	604.439	606.77	571.103	542.272	536.471	459.403	468.248	515.905	496.781	520.344	524.233	539.078	665.834	619.899	514.521	529.045	507.656	498.961	464.168	513.418
ENSG00000026025	VIM	248.41	257.524	279.043	200.802	200.561	169.606	273.904	325.197	311.069	249.772	284.621	216.684	239.166	327.356	269.713	269.562	262.741	249.469	200.906	185.613	205.515	170.448	220.303	206.159	251.792	204.385	231.883	880.13	874.613	864.443
ENSG00000026036	RTEL1-TNFRSF6B	20.9279	12.5448	17.1773	13.5399	24.7749	20.5213	15.4097	27.2366	18.1338	20.43	28.1993	20.5397	24.2937	28.9847	38.6754	35.765	22.4661	23.375	31.8931	37.9247	36.7036	26.1807	39.6382	34.899	24.8095	6.13417	31.8378	14.172	27.1899	21.6769
ENSG00000026103	FAS	45.1646	51.1319	43.2385	12.9881	25.5434	24.1691	12.6757	11.9518	23.1969	24.9833	21.7559	21.4155	17.6916	12.2853	25.8218	23.6602	14.064	17.4416	18.1	16.7765	16.4189	14.9448	9.75079	9.82537	7.21477	5.76095	3.90503	2.00789	1.6117	1.114e-21
ENSG00000026297	RNASET2	67.6329	64.4706	73.6287	69.9361	64.9442	75.5285	43.8773	61.5925	54.8291	38.7738	32.161	32.1232	40.793	39.5539	42.0276	29.5729	34.0068	30.2933	30.4841	26.2604	24.6284	20.1354	33.2163	43.6677	29.8898	24.004	23.4302	40.1577	29.0106	23.3372
ENSG00000026508	CD44	33.065	24.4544	29.8128	23.9781	27.0601	39.2748	33.1518	45.6812	42.1763	62.4689	34.0528	41.9386	33.0962	47.3187	38.3193	50.2779	43.1625	51.4069	31.4368	35.0139	29.3195	29.8896	37.7458	25.1093	37.1045	32.6454	32.7046	11.0434	15.3111	11.6686
ENSG00000026559	KCNG1	214.922	148.949	173.457	196.82	217.157	214.501	113.106	103.821	101.223	76.4705	71.8892	75.8464	70.0407	77.6028	76.6386	78.8674	65.3977	79.8643	102.884	117.686	93.8224	171.239	202.317	189.957	148.418	159.386	169.869	93.3667	76.5556	94.5157
ENSG00000026652	AGPAT4	185.615	226.759	213.658	209.808	211.069	215.508	243.763	205.565	191.902	190.638	207.154	194.524	197.038	190.221	173.055	152.805	150.415	148.713	186.715	212.029	208.755	169.73	208.357	182.315	218.505	212.195	216.73	221.871	226.444	219.37
ENSG00000026950	BTN3A1	15.4987	11.1156	23.5357	19.5977	19.2872	15.7179	15.0631	18.6878	27.4146	8.6164	13.2427	10.7077	19.242	16.5859	18.5416	8.87258	9.15568	5.50788	13.8529	9.3346	9.38224	12.8098	13.5885	4.77817	3.09204	4.80079	3.4169	4.01577	3.22339	0
ENSG00000027001	MIPEP	96.1891	97.8175	90.7937	109.9	112.299	99.6977	94.5801	115.241	80.1349	104.474	102.158	74.9541	81.586	72.8709	85.2914	82.8107	70.6295	116.583	81.9261	82.6717	96.168	84.3314	108.708	122.271	84.5159	89.2948	68.338	93.3667	87.0317	80.5134
ENSG00000027075	PRKCH	84.9169	77.8094	70.4667	49.9544	52.4353	48.3383	23.4013	35.2991	30.5778	19.1203	17.9723	17.8462	25.3994	40.6941	27.1944	20.7027	17.0034	23.8675	21.9105	15.5617	10.555	7.4724	12.0786	6.55025	39.1659	39.3665	41.4909	365.435	354.162	319.72
ENSG00000027697	IFNGR1	169.834	208.974	181.587	193.823	189.42	197.381	144.308	93.4388	147.617	142.171	172.156	163.293	164.711	193.061	211.374	254.347	238.047	216.644	189.573	171.179	170.053	167.595	80.021	108.079	117.498	110.418	127.401	119.469	101.537	105.018
ENSG00000027847	B4GALT7	33.065	42.2394	45.6227	48.9553	44.6491	51.3594	56.553	59.1779	34.7954	59.2377	49.1874	41.9386	53.8775	57.7289	42.0276	73.9381	48.3943	55.0788	52.3946	52.5209	68.0212	58.7117	75.4915	87.3367	43.2886	50.8884	47.8366	67.2642	61.2445	56.0093
ENSG00000027869	SH2D2A	13.5266	11.1156	14.4547	9.99087	8.79452	16.1128	7.80042	9.34389	6.32644	8.6164	3.78364	6.24617	7.69679	5.67825	3.70832	9.85842	5.23182	6.42586	7.62103	9.72609	7.03668	4.26994	4.52949	7.64196	0	3.84063	2.92877	1.00394	0	0
ENSG00000028116	VRK2	126.659	174.478	143.617	140.691	140.839	120.656	87.0505	68.2003	138.594	134.861	169.054	128.284	156.384	113.048	159.535	127.843	137.395	139.606	104.925	121.846	87.3533	123.999	49.4551	37.1521	116.277	118.619	122.018	162.067	146.159	157.42
ENSG00000028203	VEZT	476.437	486.864	438.158	422.614	441.755	475.326	302.266	153.655	365.879	365.12	424.714	352.463	358.67	357.73	373.304	355.888	410.698	341.488	370.573	361.81	326.033	359.742	120.786	146.289	431.856	484.88	461.769	433.703	421.459	396.733
ENSG00000028277	POU2F2	45.0886	33.3469	46.5261	30.9717	30.4426	46.3242	31.2017	21.8024	28.469	31.2344	17.0264	30.3386	29.2478	32.1768	16.0694	17.7452	27.467	23.8675	16.1947	21.3974	25.8012	20.2822	21.1376	21.8342	16.4909	18.243	25.8708	11.0434	6.44679	12.8355
ENSG00000028310	BRD9	164.547	155.619	172.989	141.858	141.38	164.071	173.25	193.789	144.454	163.712	155.129	180.375	199.589	190.54	207.238	201.093	185.73	185.397	174.611	182.212	155.954	155.427	167.43	162.665	110.283	120.299	124.804	111.438	126.507	125.995
ENSG00000028528	SNX1	239.721	246.767	253.409	330.698	285.484	272.91	303.241	293.813	269.928	278.956	321.61	296.248	261.691	281.073	260.819	257.305	260.283	298.343	259.115	264.55	279.122	264.736	271.769	314.412	262.824	261.163	266.03	377.482	390.031	365.227
ENSG00000028839	TBPL1	205.774	247.898	203.826	222.876	219.258	230.822	269.93	183.18	307.276	274.677	260.263	263.997	236.02	231.741	281.246	239.887	246.631	276.664	223.409	211.498	196.556	198.854	149.662	161.977	164.71	186.058	183.77	137.624	149.784	161.313
ENSG00000029153	ARNTL2	150.295	142.28	129.189	106.902	114.329	109.768	145.283	107.974	157.106	172.328	152.292	146.339	137.003	124.921	121.139	193.225	204.041	166.154	150.515	147.836	145.425	130.233	67.9424	96.0704	59.7795	72.0119	65.4092	11.0434	15.3111	17.5029
ENSG00000029363	BCLAF1	1819.95	2272.43	1760.9	1850.33	1764.22	1634.29	1233.74	690.068	2433.45	2902.85	3144.8	2535.68	2888.29	2423.18	2870.15	2583.37	3189.59	2231.22	1985.64	1599.79	1373.55	2488.46	546.563	578.99	2860.8	2643.58	2753.76	2244.55	2078.93	2128.42
ENSG00000029364	SLC39A9	255.502	262.329	252.958	265.757	252.335	239.677	284.715	276.164	263.601	281.11	258.234	293.57	276.315	310.411	296.665	218.857	282.518	230.413	239.11	263.577	218.137	233.779	308.005	281.661	322.603	290.928	323.141	391.538	377.944	399.066
ENSG00000029534	ANK1	33.8165	46.6856	45.6227	19.9817	21.6481	33.616	24.3763	34.2609	13.7073	19.3869	17.9723	20.5231	20.7907	20.8202	18.5416	12.8159	14.3875	22.9495	26.6736	19.4522	19.9373	17.0798	36.2359	24.0176	48.442	34.5657	44.4197	1.00394	3.22339	4.66744
ENSG00000029639	TFB1M	196.671	172.055	153.851	148.201	136.047	157.519	93.9071	85.3673	114.779	93.8801	94.3721	95.3008	88.1104	82.5871	76.5996	84.9979	78.2984	86.4388	85.7161	86.6278	89.263	77.8157	82.0217	66.5283	58.6784	67.7581	53.006	63.1245	59.0341	67.1164
ENSG00000029725	RABEP1	436.424	489.901	388.707	420.213	413.696	383.283	321.85	238.541	427.784	408.605	471.872	411.357	415.891	420.986	402.246	361.611	414.718	341.152	383.466	371.565	343.792	357.9	118.029	157.63	478.759	428.901	413.764	655.052	632.709	687.245
ENSG00000029993	HMGB3	678.248	721.914	771.09	946.443	897.923	750.759	1385.45	1416.06	1338.85	1426.52	1387.71	1432.59	1492.89	1438.24	1420.48	1546.86	1474.54	1550.14	1647.12	1684.45	1672.29	1516.26	1619.79	1637.5	1816.89	1741.95	1753.78	1173.96	1192.48	1074.45
ENSG00000030066	NUP160	763.503	918.151	751.646	898.184	883.51	734.138	1032.58	1069.36	1190.43	1152.45	1222.12	1137.7	1108.34	1134.7	1100.14	997.669	1054.21	1134.63	1089.8	986.232	1026.18	1061.08	821.346	1031.66	1036.87	1104.18	1086.08	831.267	800.209	800.468
ENSG00000030110	BAK1	147.449	148.642	162.457	124.059	137.981	145.973	140.833	161.787	132.318	154.899	137.674	152.437	140.687	135.736	120.216	153.942	156.349	157.683	162.36	171.859	154.507	144.499	191.174	186.196	151.131	112.587	141.688	106.187	101.402	104.172
ENSG00000030419	IKZF2	53.3548	55.5781	39.7504	27.9744	46.6786	34.2396	16.5759	7.26747	28.469	28.0033	29.3232	16.9539	21.551	32.1768	25.9583	25.6319	27.467	14.6877	38.1052	26.2604	22.2828	68.3191	25.6671	17.4673	171.093	160.347	159.618	379.491	346.515	319.72
ENSG00000030582	GRN	215.674	211.197	297.226	262.76	268.571	269.889	283.74	328.074	264.656	275.724	295.124	310.525	307.872	340.695	316.443	313.497	329.604	390.141	360.093	376.399	344.797	343.73	489.185	441.051	337.033	378.302	382.694	543.132	537.5	581.098
ENSG00000031003	FAM13B	153.301	140.057	122.865	119.341	134.814	125.175	155.982	84.095	179.249	206.794	219.166	227.539	250.915	219.559	254.638	191.985	211.889	210.839	195.819	206.805	185.118	218.794	87.1055	107.988	243.241	213.503	267.408	156.454	183.483	180.864
ENSG00000031081	ARHGAP31	23.2958	22.2313	28.006	25.9763	23.0011	42.296	26.3264	26.9934	26.3602	23.6951	11.3509	17.8462	13.8542	21.7666	18.5416	14.7876	13.0795	9.1798	8.57366	5.83565	7.03668	11.7423	16.6081	21.8342	10.3068	6.72111	9.27444	124.489	101.537	130.688
ENSG00000031691	CENPQ	101.449	133.388	72.2736	96.9115	96.7397	101.712	69.2287	47.7576	95.951	99.0886	131.482	85.6618	101.598	55.8361	116.194	83.7966	105.944	84.4542	56.2051	55.4387	50.4295	105.681	22.6475	33.843	146.357	125.781	112.27	77.3036	75.7498	70.0117
ENSG00000031698	SARS1	954.38	682.499	865.929	653.402	695.445	911.38	374.42	423.59	337.41	328.5	391.607	372.986	347.895	330.285	333.749	367.719	321.757	348.832	367.715	381.263	365.907	348	496.734	388.648	280.346	306.291	289.461	278.092	282.853	289.382
ENSG00000031823	RANBP3	187.118	177.85	206.883	217.801	195.509	193.353	234.988	311.463	211.936	254.184	222.289	258.77	241.679	250.789	233.624	234.63	245.895	251.526	245.778	284.002	242.765	272.209	306.496	294.761	250.456	233.318	232.837	197.777	229.667	189.031
ENSG00000032219	ARID4A	168.331	160.065	160.357	136.875	123.123	140.987	57.5281	35.2991	114.93	114.167	121.077	97.2618	122.379	92.7448	100.125	89.7116	134.719	62.4227	100.026	61.2743	39.8745	147.313	34.7261	48.0352	158.725	170.908	190.858	188.741	228.861	191.365
ENSG00000032389	EIPR1	106.71	108.933	96.2142	98.9096	100.122	119.839	97.5053	102.783	88.5702	112.013	78.5106	107.077	93.1312	82.3346	95.1803	82.8107	109.868	89.9621	100.026	94.343	106.723	85.3989	116.257	121.18	85.5466	78.733	94.2089	85.3351	103.954	114.352
ENSG00000032444	PNPLA6	95.925	95.5944	130.144	139.14	122.682	109.768	135.214	138.082	126.012	138.696	91.7533	122.853	113.143	129.61	119.902	122.244	105.471	120.782	118.126	119.631	114.642	116.356	167.965	144.108	139.142	132.502	159.13	113.446	144.069	155.193
ENSG00000032742	IFT88	41.3312	66.6938	54.6569	44.9589	47.3551	38.2678	26.3264	26.9934	44.2851	33.3885	54.8628	38.3693	40.0233	41.6405	46.9721	40.4195	40.5466	43.1451	37.1525	24.3152	19.9373	41.6319	10.5688	16.3756	56.6875	52.8087	42.9553	88.3469	81.3907	72.3454
ENSG00000033011	ALG1	86.38	94.8632	116.398	125.617	106.74	114.239	160.926	153.505	136.893	134.539	158.531	121.204	148.062	153.999	143.453	173.53	141.779	191.898	175.133	188.098	152.944	153.808	232.208	173.389	120.449	127.589	136.547	62.6748	67.7677	57.1955
ENSG00000033030	ZCCHC8	370.478	333.469	342.396	313.713	360.575	375.629	164.784	144.311	182.412	183.099	168.372	196.308	157.014	159.937	171.819	181.395	187.038	165.236	221.01	174.097	195.854	182.54	111.727	129.913	181.4	195.872	173.774	124.489	130.547	138.856
ENSG00000033050	ABCF2	143.493	146.985	173.364	179.148	161.644	178.524	260.014	280.315	222.467	249.049	284.922	268.767	272.97	268.348	252.152	283.393	266.629	301.056	275.856	306.327	337.937	267.874	373.758	322.138	200.377	232.154	256.042	142.534	129.313	134.753
ENSG00000033100	CHPF2	21.7928	26.6775	33.4265	40.9626	30.4426	23.1621	85.8046	101.745	68.5364	91.5492	91.7534	102.616	90.0524	103.155	76.6387	99.57	83.7091	100.06	96.2155	85.5895	103.205	103.546	128.336	118.996	142.234	127.701	131.307	147.58	141.023	170.362
ENSG00000033170	FUT8	113.798	121.44	134.439	131.264	114.507	141.068	122.392	114.421	134.573	102.32	122.808	124.841	112.73	241.887	142.882	118.301	98.9977	105.931	145.576	122.019	144.327	154.489	123.806	152.392	574.57	487.677	479.942	1945.93	1989.37	2031.71
ENSG00000033178	UBA6	487.708	598.021	407.894	454.585	501.964	448.136	305.191	138.082	476.591	448.053	449.308	406.001	424.862	331.231	454.887	307.583	336.144	275.394	344.852	257.741	246.284	406.712	101.159	143.014	474.113	471.438	486.665	480.889	500.432	479.579
ENSG00000033327	GAB2	130.757	86.7019	96.2143	67.938	78.4741	102.719	47.7775	55.0251	27.4146	32.3115	47.2955	33.9078	33.0962	70.0318	33.3749	17.7452	20.9273	23.8675	19.0526	26.2604	18.7645	21.3497	43.7851	25.1093	64.933	59.5298	62.4805	600.355	597.941	593.932
ENSG00000033627	ATP6V0A1	166.828	151.173	154.485	152.86	165.743	154.078	163.809	192.069	180.304	154.018	120.131	150.8	164.711	165.616	171.819	153.791	155.647	160.647	141.942	176.042	192.336	146.246	176.65	179.04	187.584	223.717	191.834	241.95	227.249	239.207
ENSG00000033800	PIAS1	256.265	258.701	232.367	243.33	269.968	224.845	232.731	135.231	273.29	250.986	272.992	249.419	254.832	252.845	250.501	220.664	237.689	204.345	268.842	224.609	222.828	266.53	106.285	123.319	399.351	358.879	387.353	540.431	527.662	524.861
ENSG00000033867	SLC4A7	860.439	1091.56	795.912	953.134	951.16	862.031	564.555	304.195	983.766	703.314	758.619	616.587	661.926	620.822	723.123	556.014	604.274	389.224	410.584	358.893	303.75	486.774	128.336	147.381	565.845	507.924	560.372	445.75	426.294	451.576
ENSG00000034053	APBA2	103.704	120.049	105.248	88.9188	101.475	111.782	96.5302	117.318	101.223	88.3181	84.186	107.077	93.1311	97.4766	79.1109	93.655	95.4806	106.486	93.3576	103.096	103.205	49.1043	90.5899	87.3367	32.9818	30.7251	38.074	39.1538	29.0105	46.6744
ENSG00000034152	MAP2K3	54.8578	62.2475	64.1428	68.937	73.0621	73.5144	96.5301	116.279	97.0053	81.8558	68.1056	109.754	100.828	82.3346	103.833	129.145	85.017	125.763	109.552	112.823	119.623	98.2087	131.355	127.73	70.0864	90.2549	87.8632	64.2523	79.779	58.343
ENSG00000034510	TMSB10	369.727	391.27	507.72	759.306	724.533	537.763	945.793	1051.68	864.596	842.253	855.103	886.064	817.376	950.154	924.608	873.456	783.465	926.242	864.98	956.067	921.805	896.688	1103.69	1038.2	925.548	957.278	933.783	1286.05	1327.23	1367.56
ENSG00000034533	ASTE1	19.3432	20.4844	22.7598	12.1379	27.8803	25.5547	28.7735	33.5039	27.73	16.1558	28.0992	22.8108	27.1463	16.548	28.5463	37.2746	34.4273	38.8707	35.7402	29.7047	34.6161	39.7632	29.0236	28.9019	28.7433	38.6452	30.2106	16.3411	18.4223	24.5041
ENSG00000034677	RNF19A	120.988	122.271	112.305	117.892	143.162	125.881	77.0291	64.369	78.0261	63.5459	72.8351	85.6618	73.1195	72.8708	71.6942	75.9098	66.7057	56.9147	84.784	100.179	60.8172	81.1289	34.7261	64.4108	232.88	213.155	258.132	313.23	320.532	322.054
ENSG00000034693	PEX3	66.8814	64.4706	70.8332	77.9288	85.2392	81.5708	41.9272	38.4137	62.21	85.0017	77.2287	64.2464	85.4343	60.568	66.6783	69.0089	66.7057	74.3564	69.5089	69.0552	57.4662	85.3989	21.1376	49.1269	77.3011	71.0517	83.8572	65.2563	60.3703	54.8425
ENSG00000034713	GABARAPL2	136.017	131.164	138.223	140.871	150.86	120.846	208.661	215.948	198.228	177.713	173.102	157.047	159.323	157.098	163.166	192.239	151.723	190.022	163.852	154.645	172.399	162.258	158.532	200.874	193.768	149.785	183.048	196.773	214.355	217.036
ENSG00000035115	SH3YL1	202.147	226.759	168.036	172.842	146.124	185.297	130.657	97.0755	137.073	155.095	126.752	141.877	118.064	122.778	118.666	97.1099	115.1	89.0441	102.884	71.973	83.2674	111.019	49.8244	73.1445	121.62	101.777	114.568	240.946	301.089	235.706
ENSG00000035141	FAM136A	740.202	764.756	701.501	645.411	679.206	670.695	1015.04	1062.84	919.45	1038.27	1026.31	1065.21	1002.89	995.593	1089.86	1153.44	1093.46	1113.52	1170.79	1063.06	1123.52	1018.38	1086.81	1160.44	865.768	918.867	897.633	419.646	388.419	409.568
ENSG00000035403	VCL	1931.7	2068.74	2267.26	1830.49	1785.18	1685.46	2536.34	2690.96	2255.92	2178.44	2128.96	2241.3	2217.94	2132.86	2091.42	2335.57	2446.54	2418.76	2384.83	2390.79	2584.14	1588.21	1931.67	1808.34	1139.95	1062.78	1069.19	1038.35	977.75	1097.29
ENSG00000035499	DEPDC1B	323.135	417.948	331.104	423.613	392.37	339.375	490.451	273.049	504.006	536.371	507.008	491.663	489.516	453.314	484.554	509.68	499.639	473.678	435.351	419.194	398.746	408.847	116.257	191.049	389.598	412.637	419.791	221.871	213.55	212.369
ENSG00000035664	DAPK2	16.5325	11.1156	17.6167	14.9863	10.1475	14.0987	3.90021	7.26747	7.38084	6.4623	6.62137	5.35386	3.07871	6.62462	3.70832	3.94337	10.4636	2.75394	3.81052	5.83565	2.34556	4.26994	1.50983	4.36683	6.18409	3.84063	5.36941	19.0749	16.117	15.1692
ENSG00000035681	NSMAF	146.538	133.388	139.127	117.892	133.947	156.092	101.405	148.464	119.148	135.708	131.482	112.431	128.536	123.029	134.736	135.06	162.186	152.385	143.847	155.617	154.807	172.933	152.493	174.673	133.989	164.187	151.32	127.501	118.46	109.685
ENSG00000035687	ADSS2	570.116	768.973	530.007	552.496	587.879	513.449	685.462	481.79	737.031	702.781	734.878	649.501	643.886	579.729	679.961	610.236	702.228	608.491	586.881	535.774	547.351	573.226	246.102	317.75	490.507	466.536	492.477	398.565	401.312	368.728
ENSG00000035862	TIMP2	116.479	151.173	128.737	158.842	165.066	149.043	227.187	259.552	209.827	204.639	152.292	220.401	227.055	231.862	213.846	228.715	237.977	215.726	225.773	232.454	232.21	279.681	342.732	314.412	520.496	539.609	555.977	387.522	377.136	401.399
ENSG00000035928	RFC1	673.322	764.756	643.235	601.451	584.497	651.56	643.535	317.692	669.549	640.845	706.595	679.048	649.608	599.055	574.79	553.057	604.276	596.689	610.635	532.989	559.417	606.331	155.513	233.626	617.378	623.143	584.29	454.787	485.926	413.069
ENSG00000036054	TBC1D23	192.378	206.751	180.232	211.807	213.775	187.311	130.657	70.5982	198.228	215.41	215.668	209.693	217.049	185.489	210.138	187.31	239.355	199.202	191.478	177.987	140.734	217.767	42.2753	41.4849	246.333	234.279	259.196	294.155	287.688	291.715
ENSG00000036257	CUL3	813.106	807.721	800.319	683.555	708.3	732.498	706.732	515.047	766.941	758.938	813.038	786.23	803.063	771.205	834.676	808.197	799.471	752.083	783.316	788.936	787.974	772.725	355.158	491.944	811.74	808.792	794.608	711.331	694.658	709.772
ENSG00000036549	ZZZ3	597.423	562.451	491.008	528.516	498.582	566.968	256.439	120.432	430.198	458.823	483.361	395.294	453.341	376.657	432.638	421.941	459.092	430.532	389.625	348.194	322.515	424.859	114.747	138.647	488.543	480.08	454.936	469.844	465.781	501.75
ENSG00000036672	USP2	27.8046	13.3387	23.4889	25.9763	20.294	27.1903	19.4359	25.9552	14.7617	18.3098	10.405	15.1497	16.9329	18.9275	17.3055	8.87258	20.8652	11.0151	5.27826	12.6439	8.85321	12.8079	16.6081	16.3756	10.039	6.14027	7.81006	1.00394	2.78292	4.66744
ENSG00000037042	TUBG2	41.5942	32.7455	50.2503	33.3134	25.4634	39.2908	19.3044	22.9999	24.6925	25.9837	23.9437	21.2461	28.096	28.6491	19.1054	39.6244	25.6378	30.4856	24.5407	39.103	27.8816	23.3923	29.6	31.8399	32.0835	20.8621	23.4098	35.7554	36.286	37.247
ENSG00000037241	RPL26L1	61.8453	71.4946	62.6872	68.7457	63.2546	79.7388	105.406	103.286	117.744	82.4671	82.1582	89.3888	108.106	91.8845	86.3321	107.901	96.2627	103.395	138.325	111.137	125.03	116.765	101.385	119.464	91.3888	80.7556	92.6972	89.4127	100.308	92.5115
ENSG00000037280	FLT4	43.5857	28.9006	61.8843	39.9635	55.4731	53.3735	47.7775	42.5666	41.1218	35.5426	44.4578	43.7232	30.7871	51.1043	43.2638	48.3063	48.3943	37.6372	35.2473	42.7948	32.8378	21.3497	39.2556	32.7513	14.4295	15.3625	17.0845	4.01577	4.83509	8.16803
ENSG00000037474	NSUN2	568.118	578.012	568.703	586.464	598.704	546.827	759.566	859.639	742.302	765.781	716.055	730.803	712.72	734.388	713.235	736.425	779.541	754.579	732.571	717.786	730.641	705.609	756.426	791.489	631.796	641.385	651.162	398.565	420.653	442.24
ENSG00000037637	FBXO42	129.254	106.71	127.834	98.9097	128.535	117.825	123.832	149.502	104.386	123.861	132.427	130.277	114.682	109.78	98.8886	120.273	113.792	134.025	112.41	142.973	137.215	105.681	172.121	136.464	127.805	135.382	136.676	110.434	108.79	98.0163
ENSG00000037749	MFAP3	266.774	313.461	241.665	250.771	267.218	260.825	252.538	178.572	267.819	230.489	270.53	252.524	221.667	247.951	266.999	245.475	245.896	227.659	274.357	262.604	263.875	293.559	108.708	186.682	300.959	306.291	294.343	426.676	392.449	408.401
ENSG00000037757	MRI1	49.5544	55.5781	69.1019	48.9553	46.0021	51.2981	57.5155	51.9105	63.2639	59.2375	44.4578	41.0427	45.4103	52.0506	46.8181	45.3152	32.6989	67.0125	50.4893	45.7064	54.9924	58.7117	69.4518	76.0866	52.0469	40.3267	35.1453	50.1971	41.981	44.2922
ENSG00000037897	METTL1	39.8283	37.7931	52.3926	54.9498	46.6786	26.1832	64.3029	63.3308	50.578	65.7001	69.9974	60.6771	72.3368	55.8361	70.4258	75.9098	75.8613	94.5519	67.6367	83.6443	66.8484	69.3865	69.4024	74.2362	32.9818	44.1673	39.0503	15.0591	20.1462	24.5041
ENSG00000038002	AGA	78.1536	48.9088	56.4637	50.9534	61.5617	68.4792	27.3015	35.2991	21.0881	31.2345	34.0528	24.0924	23.0904	41.6405	28.4305	34.5045	26.1591	33.9653	31.4368	42.7948	25.8012	36.2945	28.6868	28.3844	28.8591	39.3665	31.7284	58.2287	57.2153	63.0105
ENSG00000038210	PI4K2B	252.496	309.014	239.858	263.759	253.688	232.628	236.938	118.356	284.69	270.34	287.557	232.893	253.225	253.629	242.277	287.866	325.681	254.28	272.452	239.262	245.111	273.276	80.021	104.804	574.09	519.447	541.335	420.652	373.914	360.56
ENSG00000038219	BOD1L1	716.157	680.276	661.754	555.493	557.437	709.967	315.917	228.406	545.128	635.46	682.001	578.217	703.486	527.131	551.304	416.025	690.6	373.618	372.478	281.084	259.184	565.767	237.043	236.901	916.276	811.334	886.928	856.364	853.394	882.147
ENSG00000038274	MAT2B	325.389	380.154	345.559	412.624	370.046	376.635	517.752	435.009	518.769	530.985	556.197	470.247	447.953	438.172	446.234	491.936	449.936	425.025	456.309	443.509	479.666	481.437	215.906	315.504	363.831	404.227	390.992	317.246	345.709	325.554
ENSG00000038358	EDC4	255.934	248.908	277.956	255.937	248.197	269.261	308.698	338.246	243.274	301.101	252.887	287.099	276.015	279.759	299.352	263.472	281.867	293.598	314.567	309.785	279.71	283.727	367.267	330.662	289.155	307.062	319.199	301.894	279.622	267.042
ENSG00000038382	TRIO	339.647	309.014	324.779	320.707	330.81	264.853	369.545	394.519	336.356	339.271	349.987	360.463	394.075	450.434	368.36	327.3	360.995	323.129	337.231	371.536	364.734	426.994	468.048	459.61	375.168	366.78	401.242	575.248	533.464	599.767
ENSG00000038427	VCAN	2896.95	2934.53	2752.74	3450.88	3446.11	3098.69	3803.71	2294.45	4590.94	5792.34	5499.59	5643.91	5925.64	5360.3	5260.87	4208.6	5315.56	4149.22	4691.73	4310.64	3979.24	6138.04	2347.78	2826.45	4376.31	5152.25	4539.04	5107.08	5130.84	4941.69
ENSG00000038532	CLEC16A	72.8932	64.4706	71.3702	44.9589	67.6501	54.3805	78.9792	60.2162	68.5364	58.1607	77.5647	60.6771	64.653	64.3535	75.4026	48.3063	51.0102	55.0788	50.4893	60.3017	70.3668	78.9939	102.668	84.0616	71.1171	72.972	65.8974	88.3469	73.3322	102.684
ENSG00000039068	CDH1	885.238	889.251	914.253	971.117	1018.81	992.951	994.553	1108.81	939.479	907.956	849.432	918.192	960.216	1241.65	993.836	900.07	827.935	776.609	920.243	927.872	934.705	1120.86	1434.34	1286.04	3420.86	3171.31	3251.95	5113.14	5088.09	4880.9
ENSG00000039123	MTREX	1009.73	1006.37	921.892	1001.95	1023.75	1010.25	679.948	417.542	932.681	991.837	1092.4	932.65	1008.44	841.149	1008.9	907.188	927.137	945.112	753.922	780.838	629.761	950.744	260.815	327.358	754.282	816.658	790.969	616.779	645.631	636.655
ENSG00000039319	ZFYVE16	318.136	413.501	311.252	347.33	366.902	321.247	132.894	89.8378	270.713	239.278	300.314	215.878	300.848	247.04	308.901	257.059	300.416	190.036	242.073	195.407	135.143	424.134	87.5918	79.9586	525.061	491.996	530.529	726.689	701.231	703.516
ENSG00000039523	RIPOR1	18.7869	24.4544	21.6821	25.9763	25.0306	25.1762	8.77547	19.726	11.5985	6.4623	4.72955	15.1693	13.8542	17.9811	14.8333	28.5894	34.0068	23.8675	23.8157	33.0687	18.7645	25.6197	60.3931	45.8517	50.5034	70.0916	57.5992	62.2445	52.3801	68.8448
ENSG00000039560	RAI14	1551.81	1536.18	1485.25	1255.85	1344.23	1374.62	1346.54	717.404	1549.98	1572.49	1619.39	1556.19	1579.38	1395.9	1435.12	1311.19	1500.22	1242.02	1384.18	1401.53	1297.04	1587.34	537.5	722.71	983.271	939.997	940.138	685.695	694.641	645.275
ENSG00000039650	PNKP	80.408	97.8175	97.8327	99.56	79.3564	84.592	75.1346	91.5335	81.766	100.567	92.1362	88.0462	91.5968	101.656	93.3946	100.304	108.932	90.5512	95.6287	113.658	106.099	95.4439	114.889	110.043	80.3961	75.8944	86.0511	103.875	92.9804	81.8421
ENSG00000039987	BEST2	9.01772	24.4544	12.1962	9.99087	11.5005	12.0846	7.80042	11.4203	7.38085	9.69345	1.89182	10.7077	4.61807	6.62462	1.23611	1.97168	3.92386	3.67192	2.85789	0.972609	4.69112	1.06749	1.50983	3.27512	1.03068	1.92032	2.44064	2.00789	0.805849	0
ENSG00000040199	PHLPP2	151.049	124.495	134.61	114.895	101.495	114.347	135.532	117.153	128.637	110.94	128.644	143.662	166.251	163.723	190.361	175.874	142.567	162.483	164.696	144.325	171.226	164.468	116.57	137.556	221.597	203.554	232.349	98.3865	91.8667	91.0152
ENSG00000040275	SPDL1	601.934	638.037	539.794	568.481	570.969	620.34	337.368	153.655	488.191	455.592	521.196	454.187	444.875	425.869	451.179	412.082	435.549	391.978	449.641	444.482	338.933	452.614	101.159	131.005	519.464	557.852	525.714	406.597	402.119	471.412
ENSG00000040341	STAU2	451.637	529.104	458.03	463.576	495.199	459.208	361.744	225.218	495.5	483.595	519.304	437.232	454.88	399.37	431.401	443.629	469.556	414.896	340.089	325.44	277.765	453.682	190.239	248.686	491.635	503.145	500.76	438.269	436.769	418.817
ENSG00000040487	SLC66A1	33.065	20.0081	35.6851	30.9717	34.5016	24.1691	35.1019	40.4902	27.4146	35.5426	34.9987	35.6924	50.7988	36.9086	39.5554	33.5186	37.9307	43.1451	44.7736	40.8496	42.2201	42.6994	55.8637	58.9522	66.9943	60.49	53.206	55.2169	43.5158	42.007
ENSG00000040531	CTNS	20.3488	20.0081	30.7163	34.0698	28.5832	28.44	48.1242	49.9558	40.3828	58.2593	47.2955	62.6203	50.2345	48.3281	49.5902	56.193	36.6573	52.5778	55.2525	52.5888	55.1206	54.687	66.4325	53.4937	55.75	57.7353	55.1585	64.4924	41.9833	65.3442
ENSG00000040608	RTN4R	46.5916	35.57	58.7222	49.9544	54.1201	51.3594	86.7796	101.745	105.441	75.3935	66.2137	81.2003	85.4344	84.2274	116.194	114.358	99.4046	101.896	93.3577	93.3703	90.3041	88.6012	99.6488	100.437	59.7795	54.729	55.1585	32.1262	29.0105	31.5052
ENSG00000040633	PHF23	187.118	175.627	177.974	145.867	169.125	163.142	252.538	289.661	204.555	259.569	243.099	231.109	230.134	214.827	223.735	326.314	282.518	302.933	309.604	365.701	323.687	306.369	350.281	338.429	283.437	261.163	261.637	253.997	259.483	243.874
ENSG00000040731	CDH10	0	0	2.25855	0.999087	4.05901	1.00705	1.9501	3.11463	0	0	3.78364	2.67693	0.769679	35.9622	1.23611	0.985842	0	0.91798	0.952629	1.94522	3.51834	7.4724	3.01966	1.09171	26.7977	21.1235	20.5014	537.109	515.742	450.409
ENSG00000040933	INPP4A	222.438	242.321	223.597	238.782	240.835	207.452	274.965	239.827	262.547	236.951	243.099	246.278	225.516	262.146	250.93	342.088	387.155	349.75	422.967	372.509	387.017	405.645	397.086	413.758	300.959	273.645	301.175	165.651	199.851	215.869
ENSG00000041357	PSMA4	684.596	820.334	765.195	727.336	773.918	739.172	1062.81	948.926	1092.37	1096.44	1122.79	1050.25	1009.05	1010.73	915.955	1022.32	1012.36	1120.85	1075.52	1079.6	1137.59	1092.04	813.798	1005.46	1081.18	967.84	1029.47	778.056	739.769	730.455
ENSG00000041802	LSG1	323.887	313.461	305.808	293.732	303.073	298.086	362.719	446.43	350.063	395.277	394.445	402.432	384.839	356.783	394.318	385.464	395.002	417.681	407.725	420.167	432.756	389.632	465.028	477.077	380.322	337.976	338.761	181.714	171.646	180.863
ENSG00000041982	TNC	26.3017	15.5619	35.2334	71.9343	73.0622	57.4017	26.3264	35.2991	18.9793	33.3886	13.2428	24.0924	14.6239	124.921	16.0694	18.731	24.8511	16.5236	29.5315	22.37	25.8012	4.26994	7.54915	15.2839	159.756	129.621	166.452	1906.49	1847.01	1962.67
ENSG00000041988	THAP3	45.8402	66.8192	45.3879	46.9571	45.6098	52.3668	29.5124	30.1081	20.0607	34.4665	22.7019	33.5191	24.6297	31.8009	29.7393	29.6054	45.0765	41.4418	44.7909	51.5483	32.8379	28.8222	25.6671	49.3484	44.0327	18.243	37.7168	33.0134	41.0983	40.8402
ENSG00000042062	RIPOR3	15.0295	11.1156	10.3893	2.99726	10.824	15.1057	11.7006	8.30568	6.32644	7.53935	15.1346	6.24617	6.15743	12.3029	7.41664	3.94337	3.92386	5.50788	5.71577	2.91783	3.51834	2.13497	4.52949	1.09171	1.03068	3.84063	3.90503	15.0591	13.6994	10.5017
ENSG00000042088	TDP1	234.461	186.742	254.313	283.741	288.19	239.677	230.112	284.469	243.568	262.8	246.883	265.909	276.315	258.36	270.707	260.262	273.362	261.624	241.968	234.399	254.493	249.792	366.889	281.661	200.983	221.797	222.587	179.706	191.792	184.364
ENSG00000042286	AIFM2	31.5256	44.4638	32.1723	24.9772	24.3541	32.2255	30.2266	42.5666	26.5597	31.2477	34.0528	35.6226	36.1749	34.0695	34.611	42.3912	34.0068	39.2021	25.721	38.9043	41.6035	32.0246	36.2326	33.843	37.1045	36.2139	29.5166	27.4539	28.4867	17.591
ENSG00000042317	SPATA7	50.3489	53.355	55.1086	61.9434	62.2382	49.3453	18.526	20.7642	42.1763	31.2345	34.0528	33.0155	26.1691	29.3376	34.7174	26.6177	30.083	31.2113	27.6262	28.2056	28.1467	36.2945	13.5885	21.9391	26.7977	31.6852	32.7046	62.2925	58.8269	64.9861
ENSG00000042429	MED17	108.805	155.537	113.112	113.89	117.6	94.9063	217.486	177.843	203.854	203.544	194.059	194.069	216.923	193.555	211.075	198.769	196.186	216.355	193.876	224.515	210.968	186.826	164.124	139.269	231.947	215.918	203.847	209.804	222.563	219.658
ENSG00000042445	RETSAT	64.627	44.4625	61.4325	47.9562	63.5912	67.4722	50.7027	52.9487	63.2644	49.5443	55.6652	44.6155	35.4052	37.855	38.3193	30.5611	31.3909	39.4731	58.1104	44.74	46.9112	51.2393	72.4719	64.4108	42.2579	50.8884	55.6467	62.2444	70.8506	73.5122
ENSG00000042493	CAPG	67.6329	44.4625	65.0462	82.9242	64.9441	74.5215	63.3784	66.4454	31.6322	50.6214	46.3496	45.5078	50.0291	40.6941	42.0276	46.3346	39.2386	34.8832	39.0578	35.9865	44.5656	57.6442	51.3342	50.2186	50.5034	72.0119	60.528	141.556	135.383	123.687
ENSG00000042753	AP2S1	298.336	297.899	328.393	332.696	336.222	334.34	313.967	397.635	309.995	305.882	315.934	317.663	312.489	318.929	307.791	329.271	292.982	321.293	342.946	364.728	337.761	360.81	460.498	411.574	290.652	294.769	304.104	238.938	242.561	260.21
ENSG00000042980	ADAM28	9.01772	4.44625	8.13077	7.9927	8.79452	7.04933	0.975052	3.11463	7.38085	2.1541	6.62137	5.35386	5.38775	5.67825	3.70832	5.91505	6.53977	4.5899	8.57366	5.83565	9.38224	12.8098	4.52949	2.18342	1.03068	3.84063	3.4169	64.2523	58.8269	53.6756
ENSG00000043039	BARX2	0	0	0	0	0	0	0	0	0	0	0	0	0	4.73187	1.23611	0	0	0	0	0	0	0	0	0	2.06136	3.84063	1.46439	59.2326	77.3615	70.0117
ENSG00000043093	DCUN1D1	287.815	351.015	241.213	272.751	299.691	259.818	183.31	111.088	312.105	354.35	459.712	307.847	390.996	274.35	431.401	316.455	389.684	278.935	242.921	201.33	143.079	316.923	84.5505	88.4283	338.063	351.418	388.062	355.31	397.283	368.728
ENSG00000043143	JADE2	117.23	131.164	121.51	115.894	119.064	110.775	171.609	195.184	122.311	198.177	195.804	209.693	239.37	216.72	226.208	279.979	268.13	276.312	286.741	289.837	326.032	303.165	454.459	407.207	375.168	345.658	367.072	75.2957	77.3615	72.3454
ENSG00000043355	ZIC2	1396.24	1331.65	1311.31	1019.07	1106.08	1331.32	996.503	970.726	946.857	803.479	718.892	878.926	952.862	935.018	1021.02	455.459	468.248	453.482	603.014	522.291	625.092	377.89	469.557	408.299	43.2886	48.9681	41.9791	6.02366	8.86433	21.0035
ENSG00000043514	TRIT1	182.609	151.173	163.067	167.847	158.302	145.015	140.407	117.318	124.42	132.477	112.563	123.139	123.149	105.994	124.847	153.791	120.332	136.779	100.979	125.466	94.9952	122.761	144.944	127.73	105.129	104.657	81.0293	81.3194	69.303	89.8483
ENSG00000044090	CUL7	87.4272	89.1876	99.8943	127.385	107.958	108.54	87.3903	95.6221	89.6245	90.3763	85.676	84.432	100.52	119.243	85.2887	86.0542	92.5952	83.5472	112.309	104.884	103.203	107.664	138.673	110.006	84.5145	97.4332	99.3654	339.366	355.698	380.628
ENSG00000044115	CTNNA1	1725.37	1739.02	1834.67	1786.36	1832.07	1808.67	1999.54	2195.79	1849.38	1769.28	1685.6	1925.74	1819.5	2011.05	1822.79	1846.62	1784.05	1874.17	1755.32	1938.38	2055.87	1822.84	2249.64	2099.73	2054.14	2089.31	2053.54	3207.24	3314.92	3227.06
ENSG00000044446	PHKA2	132.26	95.5944	147.709	146.817	140.238	150.05	143.919	161.961	119.148	125.944	154.569	148.124	140.082	147.57	122.351	137.19	132.83	126.681	119.238	138.385	133.631	109.951	150.983	141.922	60.8102	85.3665	74.082	81.2918	116.876	102.236
ENSG00000044459	CNTLN	276.543	309.014	262.895	205.812	219.863	265.86	108.231	77.8657	175.031	188.484	194.858	148.124	193.189	154.259	226.208	165.621	162.186	144.123	115.268	93.3704	84.4402	156.92	31.7064	63.3191	183.461	196.832	165.476	153.603	150.694	115.519
ENSG00000044574	HSPA5	1235.22	1971.79	1917.15	2494.54	2403.95	1794.47	4972.87	5204.58	4669.36	4734.35	4880.65	4982.19	4687.42	4879.12	4861.16	4856.5	4721.45	4716.06	5389.45	5492.67	5507.35	4651.32	5647.88	5515.43	5424.21	5871.72	5422.03	4823.09	4668.03	4881.64
ENSG00000046604	DSG2	2174.02	2158.58	1931	2195.99	2300.11	2296.07	2098.26	1380.76	2294.39	2088.34	2022.31	2012.16	2033.45	2091.44	2021.03	1734.05	1998.5	1735.86	1644.2	1570.77	1545.72	1723.92	629.599	856.991	2050.94	2024.97	2061.79	2375.27	2204.72	2397.83
ENSG00000046647	GEMIN8	54.1063	60.0244	60.5291	63.9416	58.1791	65.4581	44.8524	51.9105	52.7203	35.5426	32.161	32.1232	33.0962	41.6405	38.3193	31.5469	39.2386	29.3754	44.7736	42.7948	57.4662	49.1043	52.8441	70.961	37.1045	48.0079	37.5859	65.2563	89.4492	79.3465
ENSG00000046651	OFD1	248.195	277.891	220.093	177.757	169.604	212.769	145.283	88.2478	185.841	205.088	226.065	162.601	203.663	200.631	174.194	175.964	218.428	161.564	182.81	176.612	173.488	184.818	72.4719	98.2538	186.091	176.316	207.796	314.036	319.863	318.464
ENSG00000046653	GPM6B	979.921	1138.24	810.492	930.149	885.54	951.284	1236.36	985.26	1348.59	1263.89	1276.68	1145.73	1109.85	1064.67	1178.01	1214.55	1242.55	1142.89	954.535	957.997	892.489	861.947	471.067	697.602	398.874	433.307	381.299	526.066	483.508	493.582
ENSG00000046889	PREX2	507.998	589.129	500.493	669.389	667.031	588.116	469	277.202	608.393	578.377	582.681	555.018	588.804	483.598	532.763	402.223	482.635	331.391	387.72	313.18	308.441	470.761	149.473	191.049	204.075	205.474	215.753	328.289	340.874	354.726
ENSG00000047056	WDR37	72.1418	75.5862	65.4979	73.9325	81.8566	71.5003	80.9293	97.5918	83.2981	80.7787	73.781	87.4464	63.1137	84.2274	71.6942	69.9947	83.7091	75.2744	75.2577	80.7265	84.4402	68.3191	90.5898	96.0703	93.792	88.3346	86.3987	95.3746	105.566	109.685
ENSG00000047188	YTHDC2	447.13	473.525	369.499	391.642	378.164	407.855	298.366	164.037	369.043	387.738	406.742	302.493	373.295	326.499	369.596	353.917	412.006	340.571	328.658	313.18	308.441	331.989	72.4718	113.538	352.494	340.856	326.069	346.361	356.991	351.225
ENSG00000047230	CTPS2	668.06	613.584	580.898	586.463	596.001	637.461	567.478	603.2	538.8	551.45	573.221	583.569	581.103	550.79	550.068	556.014	562.42	563.641	581.105	609.825	609.845	543.35	563.166	557.864	467.929	481.039	445.174	517.03	556.84	511.083
ENSG00000047249	ATP6V1H	131.508	124.495	125.124	141.87	151.536	140.987	147.233	171.304	149.726	162.635	137.157	174.893	143.93	167.508	158.222	200.126	156.955	185.432	190.526	203.275	206.409	175.068	250.632	205.241	327.757	330.294	336.32	446.754	434.353	422.404
ENSG00000047315	POLR2B	773.171	915.528	809.966	933.938	928.213	801.376	1075.88	966.956	1078.74	1113.17	1112.87	1055.65	1070.68	985.379	1143.18	983.502	1053.67	1061.51	943.499	972.13	987.112	1030.16	520.599	779.926	1105.56	1113.23	1137.24	1109.85	1117	1109.95
ENSG00000047346	FAM214A	91.6801	97.8175	71.8218	63.9416	65.6207	82.174	24.3763	17.6496	22.1425	23.6951	28.3773	28.5539	29.2478	35.0159	39.5554	28.5894	27.8413	24.7855	19.0526	23.3426	29.3195	43.7669	19.6278	20.7425	116.467	96.976	117.491	126.497	95.896	105.878
ENSG00000047365	ARAP2	24.0473	22.2313	27.5543	20.9808	18.942	23.1621	11.7006	7.26747	9.48966	15.0787	14.1887	10.7077	17.7026	9.46375	23.486	40.4195	54.9341	40.3911	32.3894	25.2878	24.6284	25.6197	4.52949	8.73367	23.7057	28.8048	29.2877	22.0867	24.9813	28.0047
ENSG00000047410	TPR	1136.96	1144.91	1122.04	1225.87	1210.94	1198.36	456.325	356.106	841.388	1084.59	1399	894.082	1293.05	820.507	1208.87	700.927	1331.47	664.617	591.582	432.81	398.745	1156.09	359.326	341.705	1569.73	1489.19	1464.85	1447.69	1415.88	1606.74
ENSG00000047457	CP	11.3271	9.1153	14.4658	7.29414	6.99805	11.8837	6.94559	5.9653e-36	4.26333	7.79818	9.22841	7.46746	10.3519	7.11678	5.16327	11.9345	6.78667	5.98191	2.8939	5.08751	2.36354	3.31082	6.95783e-25	5.52961	5.41313	2.96913	4.53521	4.1496	0.887133	1.28463
ENSG00000047578	KATNIP	54.8578	51.1319	63.5991	76.9297	62.1415	47.3312	44.8524	53.9869	45.3395	42.0049	41.6201	34.8001	47.7201	55.8361	40.7915	43.9945	30.083	31.2113	41.9157	35.9865	32.8378	59.7792	72.4719	65.5025	86.5773	54.729	60.5279	98.3864	99.1193	117.853
ENSG00000047579	DTNBP1	60.1181	57.8013	52.3983	39.9635	56.1496	53.3735	34.1268	31.1463	25.3058	31.2345	23.6478	24.0924	20.7813	30.284	17.3055	27.6036	22.2352	22.0315	27.6262	26.2604	31.6651	19.2147	30.1966	30.5678	25.767	21.1235	29.2877	44.1735	49.1568	57.1762
ENSG00000047597	XK	57.1122	53.355	41.5573	30.9717	46.0021	58.4087	42.9023	20.7642	22.1425	52.7754	39.7282	39.2617	53.8775	38.8014	51.9165	70.9806	58.8579	81.7002	63.8261	69.0552	68.0212	61.9142	13.5885	37.1181	39.1659	31.6852	32.7046	7.0276	8.86433	3.50058
ENSG00000047617	ANO2	19.5384	8.8925	14.9064	18.9827	9.47102	11.0775	21.4511	13.4967	13.7073	14.0017	9.45911	16.9539	17.7026	19.8739	7.41664	16.7593	10.4636	22.9495	35.2473	23.3426	34.0106	33.0921	42.2753	42.5766	28.8591	36.486	29.2877	14.0552	12.8936	14.0023
ENSG00000047621	C12orf4	130.006	122.272	106.152	110.899	104.858	93.6554	65.3285	37.3755	82.2437	88.3181	84.1861	74.9541	83.1253	69.0854	92.708	109.428	99.4046	90.88	94.3103	95.3156	100.859	96.0737	22.6475	46.9435	116.467	101.777	109.829	112.442	128.936	123.687
ENSG00000047634	SCML1	31.6707	15.5619	20.7786	27.9745	27.0601	33.2326	23.4013	19.726	35.8498	15.0787	21.7559	24.0924	15.3936	30.284	24.7221	22.6744	28.775	20.1956	28.5789	23.3426	21.11	27.7546	9.05898	22.9259	136.05	131.542	137.164	59.2326	57.2152	63.0105
ENSG00000047644	WWC3	318.626	266.775	307.163	219.799	228.658	240.684	230.112	259.552	201.392	207.871	182.561	231.108	202.425	236.594	185.416	195.197	187.037	183.596	242.92	229.536	254.493	276.479	368.399	370.089	382.383	387.904	396.849	695.732	706.729	795.799
ENSG00000047648	ARHGAP6	5.26034	4.44625	4.96881	7.9927	8.11802	5.03524	4.87526	10.3821	9.48966	6.4623	3.78364	5.35386	6.15743	13.2492	8.65275	3.94337	7.84773	2.75394	6.6684	8.75348	1.17278	5.33743	3.01966	5.45854	4.12273	6.72111	5.85754	104.41	93.4784	130.688
ENSG00000047849	MAP4	733.442	746.97	802.688	782.285	706.943	737.16	978.952	1057.94	862.504	853.023	783.213	944.063	903.602	999.368	854.149	749.238	809.625	828.933	897.378	898.689	1015.63	981.018	1290.91	1176.86	937.92	990.884	917.195	903.547	921.891	865.812
ENSG00000047932	GOPC	422.33	424.617	367.681	363.603	397.108	419.94	292.515	153.655	355.335	309.113	327.286	279.294	296.326	317.935	351.054	409.125	468.247	337.815	412.488	386.126	368.253	463.261	154.003	177.948	810.066	792.036	841.512	652.564	618.862	652.278
ENSG00000048028	USP28	625.23	606.913	578.188	678.38	660.942	744.209	575.282	537.792	582.032	565.452	550.52	535.386	529.54	538.487	531.525	456.445	491.79	496.626	589.678	626.361	633.302	706.676	566.187	711.794	606.041	630.824	618.458	674.651	700.283	659.276
ENSG00000048052	HDAC9	148.041	197.858	163.971	142.87	146.801	154.078	124.807	90.3242	142.345	129.246	118.239	130.277	110.064	107.887	108.777	75.9098	70.6295	75.2744	65.7314	57.3839	56.2935	62.9817	15.0983	32.7512	21.6443	31.6852	27.8233	80.3154	74.9439	88.6814
ENSG00000048140	TSPAN17	279.549	257.883	275.543	286.738	269.925	264.853	276.915	352.991	311.05	286.495	282.827	256.985	310.18	269.717	273.18	293.781	329.604	301.098	282.931	317.07	307.268	306.368	380.477	346.072	172.124	204.514	213.8	129.509	129.742	154.026
ENSG00000048162	NOP16	80.408	100.041	125.671	129.881	100.182	108.031	228.048	245.017	199.339	229.496	226.377	223.135	218.423	202.524	212.61	239.623	196.193	223.069	196.975	203.275	197.054	165.46	246.303	224.74	115.436	91.2662	120.573	64.2656	54.2293	79.262
ENSG00000048342	CC2D2A	49.5975	42.2394	62.3359	52.9516	72.3857	50.3524	81.9044	63.3308	64.3188	103.397	90.8074	85.6618	83.8949	94.6375	92.708	68.0231	74.5534	74.3564	86.6892	97.2609	85.6129	82.1964	84.5505	73.1444	69.0557	82.5736	75.6599	61.2405	74.9439	63.0105
ENSG00000048392	RRM2B	694.363	822.557	600.318	619.436	595.323	484.388	482.65	194.145	733.865	707.623	741.594	623.725	592.653	543.22	662.554	410.109	532.338	437.877	311.51	319.016	262.703	319.178	78.5112	89.5201	419.488	309.17	391.966	268.053	315.893	297.549
ENSG00000048405	ZNF800	35.3194	33.3469	28.006	34.9681	36.5311	41.2889	29.2516	11.4203	42.1763	28.0033	36.8905	29.4462	30.7871	34.0695	32.1388	34.5045	32.6989	28.4574	16.1947	24.3152	25.8012	23.4847	10.5688	9.82537	64.9329	44.1673	44.4197	82.3233	92.6726	84.014
ENSG00000048471	SNX29	51.8519	42.2394	51.9466	41.9617	50.0611	60.4228	39.9771	52.9487	37.9586	36.6197	34.0528	47.2925	39.2536	42.5869	29.6666	31.5469	26.1591	25.7034	36.1999	38.9043	38.7017	40.5645	58.8834	49.1269	56.6875	58.5697	54.6704	109.355	96.7018	108.518
ENSG00000048540	LMO3	78.9051	104.487	62.7877	60.9443	62.9147	65.4581	106.281	65.4072	146.563	101.243	119.185	94.5849	88.5131	79.4955	105.069	24.646	37.9307	23.8675	34.2946	32.0961	22.2828	21.3497	6.03932	13.1005	3.09204	1.92032	0.488129	1.00394	0	0
ENSG00000048544	MRPS10	370.242	324.576	292.708	320.44	319.803	340.382	240.574	223.823	307.72	242.336	274.928	238.139	271.379	247.587	237.333	265.04	260.866	260.429	242.92	254.266	245.111	244.071	191.554	216.158	189.645	185.915	205.54	175.69	161.081	159.86
ENSG00000048545	GUCA1A	57.111	40.0155	53.3005	36.1656	41.2658	66.4638	37.0512	44.6421	26.3597	22.6176	33.1062	27.6611	33.8651	28.3908	32.1381	25.5055	19.6188	19.2772	11.4314	17.5066	15.2459	10.6748	19.6274	18.5589	6.18394	6.72094	8.78613	32.1255	31.4274	30.3376
ENSG00000048649	RSF1	889.749	918.15	835.15	679.926	683.101	783.432	399.771	208.68	666.384	780.841	863.616	685.19	745.759	630.286	695.928	600.782	704.93	483.776	579.753	439.619	360.043	679.989	187.219	207.425	755.366	722.373	726.403	838.218	813.907	770.594
ENSG00000048707	VPS13D	278.046	300.122	279.609	280.743	273.983	262.839	317.867	329.113	315.268	283.264	268.639	316.77	311.72	304.733	280.596	185.338	252.435	232.249	254.352	264.55	270.912	273.276	300.456	277.294	329.818	293.809	331.439	469.845	439.993	474.913
ENSG00000048740	CELF2	268.278	282.337	232.631	197.819	190.774	195.367	367.595	241.903	361.661	440.514	367.959	356.031	397.154	340.695	386.902	345.044	355.764	304.77	278.168	272.33	259.184	216.7	81.5309	120.088	110.283	90.2549	92.2562	44.1735	41.9041	44.3407
ENSG00000048828	FAM120A	331.084	368.646	306.163	337.893	331.403	346.433	515.417	503.622	506.668	504.291	486.4	487.837	513.731	475.028	487.538	572.146	570.567	579.67	560.417	507.699	539.934	475.966	410.2	478.907	420.925	478.051	458.623	357.446	335.649	332.102
ENSG00000048991	R3HDM1	359.957	395.716	332.459	360.67	349.752	371.601	374.42	311.463	428.09	371.583	342.42	368.524	377.913	412.619	394.319	302.654	332.22	284.574	279.12	301.509	317.823	408.847	264.22	314.412	330.849	345.657	314.845	212.836	233.696	219.37
ENSG00000049089	COL9A2	7.51477	6.66938	7.67906	13.9872	16.9125	19.1339	13.6507	12.4585	11.5985	12.9246	11.3509	16.0616	20.0116	30.284	22.2499	60.1363	68.0136	70.6845	92.405	107.959	124.315	133.436	172.12	120.088	232.934	270.765	262.124	96.3785	98.3134	98.0163
ENSG00000049130	KITLG	65.3784	57.8013	59.174	107.901	121.77	78.5497	39.0021	31.1463	87.5157	77.5476	112.563	81.2002	84.6647	61.5144	85.2914	63.0939	75.8613	61.5047	60.0156	56.4113	46.9112	88.6013	18.118	24.0176	158.725	144.984	167.916	43.1695	49.1568	46.6744
ENSG00000049167	ERCC8	226.194	235.651	201.449	214.803	221.216	181.031	156.008	120.432	202.446	201.405	199.584	166.82	164.711	163.985	160.561	152.805	172.643	157.892	134.257	147.836	139.561	140.908	71.4923	101.581	117.498	124.815	122.032	141.556	153.917	148.596
ENSG00000049192	ADAMTS6	14.2781	15.5619	9.93761	17.9836	20.9716	18.1269	11.7006	4.15284	4.21763	6.4623	11.3509	6.24617	10.0058	17.0347	7.41664	5.91505	5.23182	6.42586	16.1947	12.6439	10.555	22.4172	10.5688	14.1922	72.1477	52.8087	78.1006	127.501	109.595	123.687
ENSG00000049239	H6PD	98.4435	115.603	116.541	103.905	104.181	110.775	64.3534	59.1779	55.8835	35.5427	55.8087	53.5386	50.0291	64.3535	58.097	36.4761	30.083	44.981	47.6315	44.74	65.6757	50.1718	52.8441	61.1357	73.1784	67.2111	61.9923	235.926	268.348	252.042
ENSG00000049245	VAMP3	167.579	184.519	154.936	192.824	219.187	165.156	294.466	288.622	294.179	264.954	260.125	270.37	256.303	270.663	289.249	278.993	268.131	253.362	271.499	259.686	268.567	283.951	329.143	292.578	312.296	324.533	301.663	410.612	404.536	414.236
ENSG00000049246	PER3	79.6565	44.4625	69.5633	52.9516	64.2676	75.341	58.5031	41.5284	64.3188	47.3902	46.3496	55.3232	41.3576	57.7289	70.4581	62.7248	44.4704	41.3091	51.442	28.2056	56.2934	41.6319	22.6475	36.0263	33.7615	36.2959	36.6097	14.0552	20.9521	16.3361
ENSG00000049283	EPN3	6.76329	6.66937	4.06539	9.99087	11.5005	14.0987	4.87526	12.4585	12.6529	18.3098	12.2968	12.4923	11.5452	11.3565	11.125	7.56369	9.15568	5.50788	10.9458	15.5617	10.555	35.227	40.5438	32.7395	156.634	113.296	130.81	60.2366	56.4093	52.248
ENSG00000049323	LTBP1	232.943	280.114	253.383	256.741	267.895	244.712	210.611	263.656	220.371	224.026	205.237	221.281	221.667	246.034	228.68	206.041	228.892	188.172	202.883	203.26	236.902	249.764	311.025	295.853	431.84	434.913	389.514	929.613	912.969	877.458
ENSG00000049449	RCN1	935.399	995.959	891.921	1135.15	1122.57	1044.93	1113.29	1018.87	1176.65	1073.57	1069.59	1079.49	1011.41	1001.91	1060.61	1152.95	1098.89	1071.93	967.073	972.437	1016.12	818.552	688.266	861.347	1096.9	1037.44	1027.13	1134.06	1106.23	1158.56
ENSG00000049540	ELN	20.2899	26.6775	19.8752	16.9845	13.53	18.1269	14.6258	18.6878	6.32644	10.7705	11.3509	13.3847	7.69679	7.571	11.125	18.731	7.84773	7.34384	10.4789	4.86304	14.0734	3.20246	10.5688	4.36683	11.3375	10.5617	6.34567	8.03154	4.83509	10.5018
ENSG00000049541	RFC2	219.431	202.304	189.718	215.803	224.598	235.649	207.686	212.833	182.412	166.943	178.777	200.77	180.874	178.865	206.43	186.324	163.494	225.823	199.1	215.919	206.409	215.632	283.848	269.652	143.265	169.948	161.57	109.43	97.5077	102.684
ENSG00000049618	ARID1B	345.226	392.044	330.877	318.336	332.263	331.926	498.851	541.945	495.571	512.068	511.078	518.983	503.405	530.296	513.378	447.592	513.075	580.326	670.048	654.003	732.987	556.832	585.814	579.134	492.494	517.334	544.869	553.987	561.888	519.253
ENSG00000049656	CLPTM1L	212.668	224.535	229.016	241.779	238.805	224.572	347.119	404.902	355.335	350.041	351.879	364.955	342.508	390.853	342.402	368.705	345.3	403.911	383.909	384.18	401.091	336.258	519.381	442.142	317.45	296.689	320.212	256.006	257.066	241.54
ENSG00000049759	NEDD4L	339.667	386.824	348.265	339.688	337.574	339.375	339.318	329.112	338.464	315.576	314.042	320.339	317.108	274.449	310.263	344.059	349.224	308.441	248.636	257.741	284.986	254.062	265.73	242.359	231.903	257.319	247.969	175.69	210.326	196.033
ENSG00000049769	PPP1R3F	47.2425	44.4625	39.6117	47.8312	29.9776	34.9155	21.4992	21.7257	21.0881	34.4656	25.5398	16.0072	23.7401	24.6046	19.6663	24.646	18.0239	25.6335	31.4368	30.1509	30.4923	21.3497	40.7654	31.1715	34.0125	38.4063	33.5381	53.1572	42.6182	45.5082
ENSG00000049860	HEXB	238.596	229.38	211.51	211.807	234.014	235.817	216.739	229.556	223.795	222.075	210.083	211.823	206.443	188.647	205.567	184.447	192.656	226.836	199.099	203.787	201.842	182.717	199.382	204.15	227.367	222.831	203.504	233.94	216.968	220.295
ENSG00000049883	PTCD2	232.958	200.081	205.076	189.852	190.773	215.508	94.5801	97.5917	108.604	99.0886	122.022	106.185	100.613	67.1926	103.833	111.4	104.636	98.2239	115.268	100.179	114.932	109.951	46.8047	55.6771	88.6386	103.697	88.8394	76.2997	87.8375	82.8471
ENSG00000050030	NEXMIF	34.5679	37.7931	20.7786	11.989	13.53	19.1339	9.75052	4.15284	11.5985	17.2328	10.405	16.0616	10.7755	5.67825	8.65275	4.92921	11.7716	3.67192	9.52629	7.78087	3.51834	9.60737	1.50983	6.55025	0	1.92032	3.4169	5.01971	3.22339	3.50058
ENSG00000050130	JKAMP	176.597	191.137	168.488	212.79	214.451	206.438	207.686	127.7	230.915	221.872	252.558	242.708	228.59	239.433	273.18	254.316	238.048	234.085	194.336	225.621	185.299	199.62	46.8047	99.3454	232.934	256.363	249.922	307.197	296.552	333.722
ENSG00000050165	DKK3	158.072	135.611	163.453	140.385	132.502	134.432	112.896	141.197	117.512	107.814	124.591	114.852	110.156	93.0133	134.759	141.709	135.496	122.535	132.499	126.596	135.458	170.586	166.424	177.433	214.191	182.027	209.031	95.3746	110.86	106.184
ENSG00000050327	ARHGEF5	91.531	105.809	98.9131	131.199	109.434	98.1307	187.139	123.198	106.076	149.017	132.536	166.636	128.669	124.355	140.717	93.6025	85.0129	85.8463	134.605	141.367	131.285	120.277	163.597	153.832	140.305	128.713	142.976	164.257	165.032	179.236
ENSG00000050344	NFE2L3	1313.41	1629.19	1351.74	1475.39	1518.69	1486.27	1321.89	1214.55	1596.05	1348.22	1350.57	1388.34	1345.35	1307.78	1403.97	1199.6	1314.35	1166.65	905.699	879.221	857.107	747.091	460.01	628.738	423.306	465.507	433.86	239.837	226.149	238.02
ENSG00000050393	MCUR1	141.278	160.065	163.067	161.852	164.39	165.156	222.312	198.298	224.589	228.291	235.532	221.293	213.201	229.969	210.138	184.3	231.508	223.987	242.785	197.44	229.865	233.779	196.19	252.185	260.762	278.446	244.494	175.552	186.151	186.698
ENSG00000050405	LIMA1	399.034	460.187	429.575	385.647	420.785	422.96	395.872	348.839	459.72	424.358	455.93	416.709	424.861	440.065	411.624	395.323	388.462	414.927	378.193	344.304	343.625	356.54	217.416	276.202	476.174	421.509	494.961	1056.14	1026.65	1071.18
ENSG00000050426	LETMD1	148.041	113.379	149.516	128.882	142.065	150.05	85.8046	113.165	86.4613	85.087	69.9974	98.1541	86.9737	87.0665	90.2358	101.542	90.2489	101.896	74.3051	69.0552	89.1313	75.7915	78.5112	81.8781	68.025	72.0119	64.9211	120.473	167.617	145.858
ENSG00000050438	SLC4A8	74.0545	66.6938	80.4043	56.948	72.3857	54.3806	98.4803	105.897	79.0805	89.3951	98.3747	98.1542	100.058	108.833	82.8192	78.8673	95.4807	96.3879	116.221	95.3156	136.042	139.841	163.062	169.413	154.602	137.303	143.022	404.222	411.788	418.903
ENSG00000050555	LAMC3	93.1831	62.2475	74.9838	85.9215	92.6807	79.5568	76.0541	85.1332	73.8085	56.0066	74.7269	59.7848	76.9679	86.1201	80.347	59.1505	64.0898	67.0125	72.3998	71.0004	100.859	62.9817	102.668	63.3191	74.2091	61.4502	68.338	23.0907	29.0105	28.0047
ENSG00000050628	PTGER3	16.5325	13.3388	11.2927	4.99544	2.70601	10.0705	4.87526	2.07642	15.8161	7.53935	8.5132	13.3847	13.0845	18.9275	22.2499	36.4761	40.5466	31.2113	19.0526	6.80826	9.38224	12.8098	4.52949	4.36683	19.5829	16.3227	16.1082	14.0552	16.9228	19.8366
ENSG00000050748	MAPK9	387.762	431.286	364.077	375.656	384.253	373.615	343.218	310.425	313.159	324.192	336.744	339.97	320.187	356.783	378.249	341.101	381.922	336.899	361.046	376.4	351.834	404.577	270.26	316.595	450.408	429.192	475.926	692.721	654.348	661.61
ENSG00000050767	COL23A1	45.8401	40.0163	48.7846	22.979	23.0011	29.2044	22.4262	19.726	24.2513	14.0017	21.7559	22.3078	14.6239	16.0884	29.6666	26.6177	20.9273	16.5236	17.1473	18.4796	7.03668	10.6749	1.50983	8.73367	16.4909	12.4821	18.0608	41.1617	43.5158	57.1762
ENSG00000050820	BCAR1	364.848	399.798	410.154	305.721	354.964	366.565	375.394	382.062	359.553	316.138	282.996	332.845	396.583	386.121	410.388	337.158	361.444	338.325	359.141	379.614	382.594	369.35	442.532	483.627	292.256	290.928	312.402	347.889	311.72	360.56
ENSG00000051009	FAM160A2	63.124	60.0244	63.2393	53.9507	58.8556	55.3876	46.8025	66.4454	53.7747	75.3935	64.3219	68.7079	76.9678	80.4419	72.9303	81.8249	62.7818	69.7665	74.3051	76.8361	84.4402	38.4295	78.5112	66.5942	46.3807	50.8884	47.8366	92.3628	92.6726	99.1832
ENSG00000051108	HERPUD1	124.745	106.71	129.641	124.886	152.213	122.86	89.7048	89.286	98.0598	92.6263	75.6729	73.1695	89.2827	100.316	90.2358	121.259	119.024	124.845	103.837	116.713	114.932	100.344	89.08	94.9786	105.13	98.8963	102.019	210.828	197.433	193.699
ENSG00000051128	HOMER3	78.4431	53.355	77.432	61.9434	62.9146	66.9074	65.1001	82.0186	55.8836	78.6246	53.3832	54.4309	58.4956	56.7825	54.5641	49.2921	48.3943	61.7205	37.1525	49.603	44.5656	21.3497	18.118	25.6447	24.7364	24.9641	26.3589	48.1893	58.8269	40.8401
ENSG00000051180	RAD51	147.289	135.611	154.033	140.871	143.418	145.015	133.582	158.846	111.767	115.244	116.347	116	106.985	109.78	105.069	120.273	115.1	118.419	132.415	148.809	146.597	146.246	190.239	187.774	117.498	178.59	149.367	143.564	145.053	141.19
ENSG00000051341	POLQ	329.898	313.461	296.322	255.766	274.66	281.973	247.663	106.936	295.234	312.344	314.042	295.355	302.484	278.234	300.374	270.121	296.906	223.069	258.163	261.632	247.457	259.399	98.139	87.3367	333.941	308.211	314.843	182.718	172.452	193.699
ENSG00000051382	PIK3CB	269.78	260.106	275.543	301.724	286.837	277.945	241.813	192.069	247.786	204.64	227.019	234.678	232.443	217.666	227.444	236.602	239.356	220.315	191.479	213.974	215.792	239.117	194.768	193.232	287.56	308.211	291.901	189.745	199.85	232.205
ENSG00000051523	CYBA	167.579	168.958	198.752	146.866	174.537	176.233	144.308	156.77	134.964	138.939	108.78	118.677	116.991	126.814	117.43	102.528	138.643	149.631	118.126	122.549	131.351	107.816	138.904	133.188	114.406	130.582	121.544	134.528	145.053	143.524
ENSG00000051596	THOC3	346.82	430.25	370.605	396.943	409.105	349.078	413.065	461.012	421.764	399.413	406.429	409.754	388.842	386.72	359.531	454.916	446.649	417.713	453.233	496.046	444.371	370.725	523.6	502.279	387.864	324.673	366.248	290.707	276.277	303.421
ENSG00000051620	HEBP2	199.893	184.519	216.369	203.814	209.462	239.677	181.36	204.527	164.487	140.016	186.344	176.678	169.329	204.417	164.402	212.429	218.429	202.874	283.883	273	256.839	278.614	332.163	372.272	317.45	301.49	304.104	335.963	342.103	320.887
ENSG00000051825	MPHOSPH9	275.045	304.568	252.611	297.728	290.896	320.243	135.532	76.8275	182.412	185.253	224.181	160.618	220.132	150.474	202.722	159.706	184.422	143.205	148.61	122.356	96.168	178.27	58.8834	56.7688	180.976	216.996	193.787	209.824	225.852	241.54
ENSG00000052126	PLEKHA5	600.431	573.566	509.982	472.569	480.992	554.883	305.191	168.19	419.654	430.82	429.445	442.587	404.85	388.014	477.137	383.493	419.853	411.254	465.836	418.221	377.635	469.694	143.434	186.682	516.372	420.548	444.684	385.514	406.957	425.904
ENSG00000052344	PRSS8	272.035	217.866	325.23	308.718	352.457	325.277	239.862	239.826	204.555	214.333	192.02	207.016	173.947	204.417	169.347	182.381	159.57	191.858	149.563	143.946	144.252	183.608	298.947	252.185	447.315	433.992	449.079	609.394	633.396	696.616
ENSG00000052723	SIKE1	529.792	633.592	500.496	559.491	533.086	504.53	451.448	207.642	617.886	544.985	532.547	472.925	513.376	511.041	490.733	432.786	578.115	389.225	442.973	355.976	369.425	453.682	172.121	170.306	538.014	523.284	529.618	475.867	506.074	435.239
ENSG00000052749	RRP12	231.455	240.098	247.989	202.815	218.51	249.748	255.464	317.692	227.752	277.879	223.235	266.801	285.551	274.449	258.346	246.461	230.2	283.593	265.784	296.646	282.32	235.634	351.79	280.569	142.234	180.51	145.462	64.2524	62.0503	59.6586
ENSG00000052795	FNIP2	104.455	106.71	117.896	89.9179	100.122	92.6483	119.931	77.8657	110.713	109.859	105.942	108.862	103.137	111.672	103.833	131.117	154.339	159.729	121.937	110.877	118.451	105.681	49.8244	79.6947	78.3318	106.578	94.2088	381.499	346.515	385.064
ENSG00000052802	MSMO1	176.597	268.998	181.136	362.668	311.868	183.283	856.1	734.015	959.517	791.635	856.047	743.295	870.505	735.337	850.443	1284.55	1328.89	1320.05	1211.74	1190.46	1230.24	924.437	551.088	758.735	1247.12	1204.03	1271.07	1026.04	1005.71	1022.18
ENSG00000052841	TTC17	541.064	502.426	463.906	445.593	480.317	525.679	327.617	286.546	342.682	323.115	317.826	291.786	294.787	311.358	307.791	233.645	238.048	241.429	285.789	265.522	283.813	278.614	253.651	268.56	304.051	292.848	296.294	425.672	402.118	452.742
ENSG00000053108	FSTL4	28.5561	24.4544	26.6509	23.9781	23.0011	21.148	21.4511	14.5349	9.48966	12.9246	17.0264	17.8462	14.6239	16.0884	3.70832	10.8443	11.7716	15.6057	17.1473	20.4248	17.5917	20.2822	34.7261	25.1093	21.6443	13.4422	21.4777	9.03549	15.3111	15.1692
ENSG00000053254	FOXN3	939.766	858.563	890.31	882.991	886.95	855.649	928.381	976.445	954.301	887.963	888.162	877.074	896.328	897.59	904.774	718.658	788.087	711.58	791.875	769.972	778.217	1086.64	841.575	1004.16	1009.94	987.003	1047.88	677.815	701.854	663.923
ENSG00000053328	METTL24	9.01772	6.66938	5.42052	5.99452	1.353	2.01409	0	0	0	1.07705	0.945911	0.89231	0	3.7855	2.47221	4.92921	1.30795	0	1.90526	0.972609	2.34556	4.26994	0	4.36683	4.12273	1.92032	2.44064	34.1341	33.0398	36.1727
ENSG00000053371	AKR7A2	70.6388	84.4788	93.9557	83.9233	85.2392	94.6625	96.5301	98.6299	99.1142	88.3181	70.9433	82.9849	83.895	72.8709	61.8054	87.7399	98.0966	93.6339	100.026	94.3431	102.032	95.0062	129.845	117.905	79.3625	82.5736	88.8394	139.548	145.053	124.854
ENSG00000053372	MRTO4	157.059	151.173	150.382	149.863	123.8	138.973	259.364	281.355	211.936	260.646	249.66	243.601	240.909	229.023	218.791	232.659	283.826	300.147	296.268	283.029	273.243	227.374	348.771	312.185	166.97	181.47	182.072	95.3432	81.3907	72.3454
ENSG00000053501	USE1	12.0236	22.2313	25.2957	15.9854	20.295	14.0987	19.501	12.4585	10.5441	15.0787	17.9723	22.3078	17.7026	17.0347	27.1944	14.7876	17.0034	17.4416	28.5789	14.5891	21.11	14.9448	13.5885	13.1005	13.3989	17.2829	10.2507	15.0591	16.9228	18.6698
ENSG00000053524	MCF2L2	30.5616	43.8158	25.0409	29.0347	30.1238	25.9186	11.8864	13.0945	4.27007	15.9321	6.62182	13.0297	13.0365	9.12267	15.7835	14.1401	7.11082	16.2855	12.5367	13.8394	9.01274	3.85133	7.87915	3.27513	4.12273	4.93978	5.01905	3.63983	6.78618	3.50058
ENSG00000053770	AP5M1	445.626	493.534	401.118	436.601	474.227	398.791	312.992	184.801	518.768	477.133	524.034	414.032	434.868	373.818	490.734	406.167	448.628	384.634	379.146	355.002	323.687	423.792	132.865	169.215	477.206	506.963	481.782	488.921	464.974	421.237
ENSG00000053900	ANAPC4	204.402	202.304	169.391	164.849	167.096	174.219	182.335	127.7	214.045	257.415	252.558	215.939	243.988	261.199	224.972	223.786	251.127	206.546	191.478	191.604	213.446	197.485	77.0014	123.363	183.461	190.111	182.56	158.623	152.305	176.196
ENSG00000053918	KCNQ1	12.0236	13.3388	10.841	8.99179	10.1475	15.1057	3.90021	5.19105	5.27203	1.07705	5.67546	3.56924	3.07871	2.83912	4.94443	6.90089	3.92386	3.67192	1.90526	4.86304	1.17278	2.13497	0	2.18342	5.15341	3.84063	1.46439	10.0394	8.86433	3.50058
ENSG00000054116	TRAPPC3	130.757	104.487	138.223	146.866	149.507	128.902	157.958	195.184	136.019	177.713	156.075	159.724	140.081	149.527	170.583	168.579	126.872	155.139	148.61	158.535	197.027	182.54	229.494	220.525	184.492	192.032	192.811	184.725	167.617	180.863
ENSG00000054118	THRAP3	876.947	871.463	936.381	928.148	876.735	893.251	1170.05	1312.3	1043.86	1197.66	1317.66	1284.89	1251.5	1213.26	1111.25	1138.65	1119.6	1225.45	1095.53	1108.77	1165.74	1090.95	1363.36	1240.18	1346.05	1264.52	1259.88	1043.07	1094.32	1061.81
ENSG00000054148	PHPT1	110.467	104.487	105.248	89.9179	89.9747	113.796	114.081	125.623	104.386	136.785	103.104	119.57	140.851	115.458	127.319	134.074	134.719	135.861	137.179	153.666	152.461	133.436	178.16	170.306	99.9761	109.458	108.365	77.3036	91.8667	81.6802
ENSG00000054219	LY75	54.9981	62.2475	55.6152	56.2921	45.4088	49.0133	38.0219	27.5444	34.5277	32.8958	36.8694	34.798	20.1452	12.0377	36.2033	19.3832	36.6227	26.618	23.8155	20.4928	19.6608	11.216	4.52958	16.9941	28.852	17.7021	29.0351	1.00394	7.85751	5.83431
ENSG00000054267	ARID4B	378.362	371.383	305.941	310.153	305.302	291.494	223.484	108.737	336.931	353.826	343.762	307.691	324.85	308.145	265.535	300.179	341.246	227.015	246.806	211.451	164.357	318.363	72.5672	91.6567	386.244	370.858	368.818	493.684	479.894	448.891
ENSG00000054277	OPN3	66.8986	88.0904	64.867	103.879	96.0443	58.336	107.68	89.8841	86.0635	70.7609	69.2923	51.2077	64.1878	79.768	49.2455	66.3162	54.4166	42.1512	32.9296	38.8172	32.6618	77.2071	53.0047	53.995	95.8504	108.617	83.9731	145.798	151.558	146.094
ENSG00000054282	SDCCAG8	62.2246	65.8535	50.2439	48.0399	41.5349	47.2308	24.8547	22.0768	21.4652	28.4194	25.2248	23.9144	25.9841	21.2113	18.5416	18.7251	19.2733	17.1893	20.8545	32.8719	21.0223	39.8905	8.05373	9.31765	28.4513	31.7814	31.7376	74.7301	68.1499	67.3247
ENSG00000054356	PTPRN	20.2899	22.2313	19.8752	15.9854	8.11802	20.1409	10.7256	12.4585	10.5441	9.69345	13.2427	12.4923	14.6239	14.1956	8.65275	4.92921	10.4636	11.0158	10.4789	14.5891	22.2828	9.60737	7.54915	14.1922	5.15341	5.76095	3.4169	0	1.6117	0
ENSG00000054392	HHAT	3.00591	4.44625	1.35513	7.9927	4.05901	2.01409	1.9501	2.07642	3.16322	1.07705	2.83773	2.67693	1.53936	3.7855	3.70832	2.95753	1.30795	0	4.76315	3.89043	1.17278	4.26994	6.03932	6.55025	14.4295	8.64143	9.27444	28.1104	21.7579	16.3361
ENSG00000054523	KIF1B	946.861	771.425	848.763	855.219	823.979	875.126	891.199	911.547	886.756	832.558	774.701	873.571	805.085	846.059	808.414	666.429	727.223	730.711	777.344	724.595	764.653	703.474	602.422	655.025	733.845	740.282	793.206	827.249	874.345	914.82
ENSG00000054611	TBC1D22A	48.0945	75.5863	45.171	49.9544	48.7081	50.3524	58.5031	70.5982	51.6659	62.4689	59.5924	47.2925	52.3381	63.4071	61.8054	67.0373	61.4739	53.2428	58.1104	61.2743	53.9479	59.7792	87.5702	65.5025	65.9636	61.4501	62.4805	81.3194	78.1673	95.6826
ENSG00000054654	SYNE2	837.145	749.193	771.52	964.119	912.602	860.019	462.175	435.01	699.071	863.794	1001.72	807.541	981.338	723.03	885.053	567.845	842.323	554.46	648.74	503.811	550.034	837.977	588.834	555.68	965.747	975.521	950.87	1087.27	1170.9	1063.01
ENSG00000054690	PLEKHH1	202.807	160.457	177.017	209.863	192.041	198.258	183.021	190.15	147.19	172.874	128.527	155.998	167.046	190.411	157.205	150.207	164.618	169.059	167.433	140.647	156.81	130.023	152.286	140.218	124.655	144.571	131.694	230.427	225.201	224.399
ENSG00000054793	ATP9A	69.8874	86.7019	91.2455	62.9425	60.8852	62.4369	77.0291	68.5219	63.2644	51.6984	76.6188	56.2156	57.7259	55.8361	74.1665	126.188	138.643	107.404	153.373	157.562	173.571	134.503	187.219	158.298	131.927	158.426	139.605	83.3273	84.6141	91.0152
ENSG00000054965	FAM168A	193.13	182.296	188.363	172.842	162.36	159.113	239.863	295.889	206.664	303.728	234.586	264.124	284.012	287.698	244.749	192.239	206.657	221.233	253.399	217.865	297.887	222.037	291.397	288.211	277.253	260.203	287.994	229.903	251.425	245.041
ENSG00000054967	RELT	15.6962	8.8925	14.003	23.9781	16.236	19.1339	30.2266	21.9908	18.9793	23.6951	18.7731	19.6308	22.3207	17.9811	22.2496	24.646	23.5432	19.5603	22.3023	22.3699	28.1467	28.8221	25.6671	30.5678	16.4909	21.1013	19.037	13.0513	12.3976	14.9742
ENSG00000054983	GALC	85.6684	88.925	72.7253	73.9325	85.9158	85.599	78.0042	61.2544	84.3525	79.7017	77.5647	78.5233	70.0408	77.6027	84.0553	86.7541	69.3216	91.798	87.6419	77.8087	99.6863	82.1964	37.7458	73.1445	96.884	95.0557	98.602	174.686	164.393	159.86
ENSG00000055044	NOP58	1090	993.547	915.497	644.023	689.371	864.889	576.699	349.552	807.487	956.915	1063.19	837.504	944.268	716.744	777.343	794.095	1007.64	967.348	691.234	695.842	616.098	848.247	253.652	304.587	808.055	785.23	750.033	373.869	384.243	386.231
ENSG00000055070	SZRD1	221.686	228.982	233.985	349.681	303.749	303.121	504.103	544.022	408.056	424.358	453.091	447.046	444.103	466.564	470.957	476.162	436.857	483.776	486.792	489.222	493.741	487.841	600.913	554.588	513.279	485.84	478.366	421.656	352.155	407.235
ENSG00000055118	KCNH2	90.9287	86.7019	80.8561	63.9416	64.9442	62.4369	39.9771	39.452	52.7203	26.9262	29.3232	40.154	35.4052	27.4449	28.4305	19.7168	20.9273	22.9495	14.2894	8.75348	12.9006	11.7423	13.5885	16.3756	25.767	24.9641	32.7046	14.0552	16.117	15.1692
ENSG00000055130	CUL1	473.662	435.94	502.413	502.715	474.265	510.628	625.403	592.817	544.307	646.794	685.185	628.066	616.14	635.164	611.663	577.197	649.399	619.837	639.3	678.828	616.882	648.27	505.772	592.451	737.544	713.61	743.082	787.422	751.896	819.687
ENSG00000055147	FAM114A2	65.3785	75.5863	72.2735	63.9416	71.7091	72.5074	52.6528	37.3755	54.8291	64.623	63.376	59.7848	53.1078	48.2651	56.8609	49.2921	40.5466	65.1766	62.8735	63.2196	65.6757	66.1841	21.1376	44.76	72.1477	60.49	66.3855	106.418	99.1194	100.35
ENSG00000055163	CYFIP2	353.194	329.023	373.112	398.636	377.488	392.749	363.632	408.016	331.084	353.272	346.203	399.755	336.349	346.373	313.971	306.597	289.058	303.851	288.647	328.742	338.933	341.595	458.809	376.639	255.609	235.239	259.197	156.615	148.276	159.86
ENSG00000055208	TAB2	810.843	878.133	743.967	636.418	731.298	823.763	521.653	390.367	550.399	546.065	600.654	559.477	605.738	593.375	627.942	619.108	643.513	596.688	644.931	631.223	626.263	739.768	314.044	374.456	865.772	783.488	826.885	714.809	713.984	711.785
ENSG00000055211	GINM1	87.9229	82.2556	90.3419	97.9105	110.27	102.719	100.43	61.2544	118.093	86.164	98.3508	74.0618	99.2886	84.2274	84.0553	89.7116	113.792	128.517	79.0682	92.3978	106.723	112.086	66.4325	99.3454	119.559	105.617	114.222	136.536	107.984	108.518
ENSG00000055332	EIF2AK2	671.819	664.715	531.195	496.547	546.13	591.522	514.424	447.209	566.216	524.377	453.092	485.634	531.847	541.326	521.637	349.974	395.984	373.646	327.704	295.48	351.834	305.906	187.219	170.307	326.726	346.618	334.856	399.569	406.088	379.23
ENSG00000055483	USP36	219.431	215.643	230.824	203.814	216.48	218.529	245.713	250.208	228.806	238.028	238.369	248.062	256.303	264.985	223.735	268.149	268.131	255.199	228.631	242.18	224.001	206.025	256.671	268.56	154.602	146.904	170.357	129.509	116.042	114.352
ENSG00000055609	KMT2C	377.829	317.907	304.885	300.725	303.997	291.037	330.543	274.087	341.628	357.581	309.313	333.724	360.955	402.209	300.374	284.908	376.691	295.589	357.84	321.869	375.29	354.405	212.886	265.285	568.936	510.804	565.232	711.796	653.543	744.457
ENSG00000055732	MCOLN3	33.8164	22.2313	21.6821	24.9772	23.0011	30.2114	22.4262	9.34389	16.8705	25.8492	27.4314	26.7693	43.102	62.4607	51.9165	83.7966	103.328	75.2744	50.4893	53.4935	50.4295	30.9571	31.7064	26.201	388.567	429.191	432.97	185.729	173.257	152.859
ENSG00000055917	PUM2	786.794	889.249	740.348	929.151	867.947	759.318	1070.6	628.118	1150.36	994.121	1071.71	990.469	982.101	954.892	970.338	895.144	995.352	835.362	938.337	909.386	861.993	1009.84	315.554	458.518	1099.74	1059.06	1111.48	1073.21	1114.49	1005.84
ENSG00000055950	MRPL43	101.449	103.182	121.456	120.231	115.291	97.6836	144.58	197.26	103.332	124.347	122.022	133.847	138.542	125.048	134.736	139.99	126.872	169.223	140.037	151.27	138.388	147.313	160.042	174.673	155.96	140.247	132.913	139.354	141.023	120.187
ENSG00000056050	HPF1	141.278	135.611	122.865	131.88	148.144	150.05	84.8295	69.5601	117.039	98.0116	113.509	115.108	113.143	98.423	95.1802	107.457	90.2488	116.584	76.2103	100.179	99.6863	111.019	55.8637	60.044	156.664	180.499	158.642	138.544	152.305	133.022
ENSG00000056097	ZFR	1185.83	1196.04	1043	874.201	965.37	1017.12	995.529	834.72	1080.77	981.193	1042.4	994.923	961.331	1012.62	1053.16	931.621	1034.59	967.55	1025.03	974.558	1047.29	1076.03	566.186	768.562	1216.2	1133.95	1154.43	938.688	921.083	969.662
ENSG00000056277	ZNF280C	114.224	133.388	101.635	97.9106	92.0042	87.6131	74.104	46.7194	99.1142	86.164	72.8351	73.1695	85.4343	74.7636	74.1664	69.0089	71.9375	49.5709	53.3472	49.603	48.084	72.589	10.5688	27.2927	62.8716	60.49	55.6467	45.1774	35.4573	43.1739
ENSG00000056291	NPFFR2	18.0354	28.9006	31.6197	26.9754	27.7366	42.296	32.1767	20.7642	22.1425	23.6951	34.9987	16.0616	26.1691	16.0884	23.486	52.2496	56.242	49.5709	79.0682	74.8909	86.7857	68.3191	72.4719	73.1444	51.5341	39.3665	51.2535	41.1617	51.5743	42.007
ENSG00000056487	PHF21B	110.467	82.2556	105.248	86.9206	75.7682	91.6413	84.8295	74.7511	54.8291	57.0836	58.6465	58.8925	73.1195	65.2999	61.8054	63.0939	65.3977	56.9148	52.3946	38.9043	41.0473	43.7669	52.8441	45.8517	37.1045	41.2868	38.074	21.0828	25.7872	24.5041
ENSG00000056558	TRAF1	28.5561	22.2313	29.3611	17.9836	16.9125	19.1339	7.80042	2.07642	8.43525	9.69345	2.83773	4.46155	3.84839	8.51738	6.18054	1.97168	10.4636	4.5899	10.4789	6.80826	11.7278	5.33743	3.01966	7.64196	8.24545	4.80079	7.32193	14.0552	11.2819	12.8355
ENSG00000056586	RC3H2	400.537	460.187	388.47	371.66	347.722	342.396	314.941	159.884	385.913	350.041	397.282	347.109	360.21	364.355	355.998	322.37	370.151	291	328.656	319.015	249.802	360.811	138.904	135.372	474.113	422.469	460.795	674.651	611.639	618.437
ENSG00000056736	IL17RB	51.1004	48.9088	30.2646	44.9589	31.7956	32.2255	34.1268	26.9934	36.9042	33.3885	37.8364	24.9847	36.1749	39.7477	29.6666	33.5186	40.5466	45.899	31.4368	42.7948	42.2201	33.0921	33.2163	36.0264	34.0125	32.6454	39.0503	12.0473	13.6994	5.83431
ENSG00000056972	TRAF3IP2	105.958	82.2556	80.856	110.899	117.711	112.789	78.0042	80.9803	56.9379	78.6246	75.6729	70.4925	69.2711	89.9056	58.097	85.7682	82.4011	65.1766	105.742	106.014	94.9952	115.288	189.962	172.49	240.149	181.47	193.299	235.926	258.678	227.538
ENSG00000056998	GYG2	477.186	400.162	488.3	429.606	451.901	462.235	481.675	541.945	409.109	439.437	438.904	469.355	458.729	498.74	432.638	473.204	393.694	470.005	385.815	399.742	385.844	373.619	498.244	446.508	375.168	387.903	334.856	385.513	423.069	411.903
ENSG00000057019	DCBLD2	419.322	562.451	437.706	457.581	441.08	355.488	692.288	533.64	759.947	762.552	766.186	690.65	759.675	687.066	776.277	641.781	660.515	571.902	633.498	557.305	620.399	628.751	247.612	389.74	633.864	615.462	680.932	603.37	597.941	555.425
ENSG00000057252	SOAT1	26.3017	28.9006	22.1338	43.9599	44.6491	25.1762	46.8025	31.1463	40.0674	48.4673	48.2414	32.1232	49.2594	48.2651	42.0277	55.2072	47.0864	48.6529	44.7736	42.7948	38.7017	52.3068	18.118	27.2927	102.037	106.578	103.971	110.434	105.566	135.356
ENSG00000057294	PKP2	163.765	184.081	164.313	101.907	117.642	133.937	114.052	100.706	129.692	106.628	129.59	101.723	105.387	210.021	135.972	72.9523	82.4011	88.0923	126.674	123.521	107.829	213.435	134.375	152.743	546.773	478.996	547.604	1091.73	1061.12	1124.58
ENSG00000057608	GDI2	2639.69	2607.22	2625.83	2731.28	2815.65	2676.7	3193.65	3194.49	3208.39	3130.24	3344.92	3089.6	3067.05	2853.42	2973.36	3027.55	2877.34	3161.01	2981.92	3130.14	3274.5	3116.31	3104.1	3224.15	2867.25	2785.12	2725.27	2949.82	2914.45	2906.06
ENSG00000057657	PRDM1	3.00591	2.22313	3.61368	0	2.0295	1.00705	1.9501	0	3.16322	3.23115	4.72955	2.67693	2.30904	8.51738	2.47221	0.985842	0	0.91798	1.90526	3.89043	5.8639	5.33743	6.03932	5.45854	20.6136	20.1633	25.3827	78.3075	53.186	67.6779
ENSG00000057663	ATG5	369.727	373.485	320.262	378.654	405.225	361.53	249.613	136.005	295.234	317.73	345.257	298.031	284.011	271.61	336.221	295.752	299.522	279.066	255.304	253.851	290.85	294.626	93.6095	136.464	288.591	289.008	297.758	228.899	252.231	242.707
ENSG00000057704	TMCC3	50.3489	55.5781	44.7193	28.9735	34.5016	46.3242	33.1518	34.2609	29.5234	19.3869	20.81	19.6308	22.3207	71.9245	21.0138	17.7452	22.2352	17.4416	21.9105	19.4522	19.9373	29.8896	22.6475	28.3844	71.117	62.4103	59.0636	533.092	514.935	556.595
ENSG00000057757	PITHD1	354.698	331.246	313.035	314.712	315.926	306.142	279.841	275.126	267.82	283.265	264.855	286.431	287.09	295.269	299.138	312.512	283.827	293.754	313.415	302.482	296.714	308.503	412.184	379.915	299.928	280.366	258.709	226.891	207.909	205.368
ENSG00000057935	MTA3	672.571	738.077	698.798	744.321	700.855	762.334	728.364	782.81	689.583	738.856	673.489	753.109	718.88	712.621	730.539	823.18	831.86	823.429	879.278	984.28	1034.39	936.184	973.842	896.292	740.028	763.326	726.823	602.366	689.806	604.435
ENSG00000058056	USP13	304.438	291.229	267.85	306.713	281.533	263.833	325.667	298.996	322.648	281.11	244.99	307.829	314.028	260.252	307.59	259.271	243.28	270.8	252.444	214.946	274.43	233.779	194.767	200.051	203.039	236.145	217.21	133.52	125.708	126.019
ENSG00000058063	ATP11B	305.678	339.119	260.566	249.772	259.777	266.867	195.01	96.5535	256.001	210.025	228.91	212.284	209.167	229.581	233.624	157.735	197.501	155.936	176.236	136.857	133.697	252.994	61.9031	57.8605	287.56	279.406	303.128	567.228	597.359	646.442
ENSG00000058085	LAMC2	77.4021	75.5863	74.9838	51.9526	48.7081	79.5568	48.7526	40.4902	31.6322	46.3131	43.5119	40.154	40.0233	55.8361	45.736	39.4337	41.8545	32.1293	53.3472	52.5209	50.4295	42.6994	46.8047	41.4849	37.1045	38.4063	35.1453	278.092	321.534	316.219
ENSG00000058091	CDK14	226.946	282.337	218.176	258.763	263.159	272.909	260.339	157.808	300.506	280.033	255.396	244.493	252.454	238.487	276.887	192.239	188.346	181.76	202.91	196.467	175.917	181.472	72.4718	110.263	92.7613	92.1752	105.924	226.891	244.173	192.532
ENSG00000058262	SEC61A1	602.213	757.866	706.948	740.92	701.976	655.038	1163.99	1244.6	969.147	1129.37	1101.54	1129.93	1123.8	1146.54	1134.18	1127.24	1035.58	1211.11	1203.8	1212.15	1309.7	1080.71	1495.9	1434.5	1316.04	1363.45	1387.38	1534.25	1527.74	1507.28
ENSG00000058272	PPP1R12A	1028.84	1040.42	869.354	758.05	824.314	897.787	556.567	290.203	845.8	785.306	799.628	752.264	750.82	748.78	762.678	627.994	701.063	616.705	736.039	601.026	615.102	672.908	199.298	224.892	919.662	844.677	841.634	827.222	805.316	747.328
ENSG00000058335	RASGRF1	10.5207	4.44625	3.16197	2.99726	2.70601	5.03524	0.975052	2.07642	6.32644	2.1541	1.89182	3.56924	3.84839	3.7855	1.23611	1.97168	0	0.91798	2.85789	4.86304	2.34556	1.06749	3.01966	3.27512	21.6443	32.6454	33.1927	26.1025	23.3696	25.6709
ENSG00000058453	CROCC	221.103	218.402	249.343	282.003	230.489	218.4	231.679	268.696	263.483	234.52	203.803	225.641	242.798	249.756	244.87	232.659	274.012	229.409	217.199	248.015	227.519	233.244	269.938	236.901	141.331	149.785	156.616	92.6872	80.2391	132.781
ENSG00000058600	POLR3E	308.943	357.559	322.308	309.309	327.581	341.904	301.053	344.94	260.91	303.856	273.31	314.595	288.586	270.628	294.579	257.244	258.066	301.398	289.484	286.918	254.699	242.178	317.547	319.237	220.342	225.977	230.233	143.696	124.74	161.278
ENSG00000058668	ATP2B4	191.626	206.751	179.328	215.803	241.511	227.593	148.208	165.075	139.182	142.171	109.726	134.739	117.761	226.184	123.611	126.188	159.571	130.353	159.089	160.48	170.053	167.595	185.709	195.416	1079.12	983.204	1017.26	1891.43	1855.07	1842.5
ENSG00000058673	ZC3H11A	728.187	780.419	715.264	733.821	804.81	762.543	730.235	590.398	677.644	746.928	697.122	723.678	717.361	808.172	794.946	729.567	661.773	591.216	683.987	576.818	612.365	708.294	383.335	566.159	1025.02	930.175	968.995	1475.37	1461.8	1416.56
ENSG00000058729	RIOK2	379.496	395.716	335.62	319.708	315.927	311.178	202.811	99.6681	302.615	283.264	336.744	276.616	321.725	238.487	318.916	333.214	371.459	299.261	309.605	253.851	246.284	281.816	84.5505	103.712	291.684	284.207	279.209	238.938	222.915	182.03
ENSG00000058799	YIPF1	91.6801	73.3631	104.797	83.9233	100.799	98.6906	102.38	123.547	95.951	96.9345	101.212	102.616	100.828	118.297	107.541	110.414	96.7886	110.158	95.2629	114.768	126.66	109.951	132.865	121.18	108.222	105.617	95.185	115.453	134.577	120.187
ENSG00000058804	NDC1	880.731	1042.65	836.115	924.155	920.042	843.905	1140.81	823.3	1327.5	1180.45	1240.09	1102.9	1057.54	1051.42	1157	1048.94	1116.99	1028.14	1020.27	994.979	1008.59	983.155	457.479	684.501	887.417	850.701	854.713	547.149	544.754	528.588
ENSG00000059122	FLYWCH1	63.1241	64.4706	72.7252	69.9361	66.9736	69.4863	56.553	55.0251	45.3395	37.6968	52.0251	43.7232	43.102	39.7477	34.611	33.5186	35.3148	39.4731	33.342	30.1509	32.8378	36.2945	42.2753	42.5766	25.767	38.4063	30.7521	56.2208	32.2339	52.5087
ENSG00000059145	UNKL	58.5553	124.441	90.4773	77.0265	78.0394	67.4886	112.32	132.985	98.168	115.03	95.2468	71.636	99.7234	113.031	102.214	89.5588	137.173	111.846	131.899	118.72	136.138	92.1252	98.4229	111.74	97.3175	88.7525	97.1325	73.3314	74.2733	75.9713
ENSG00000059378	PARP12	36.8224	37.7931	42.009	28.9735	16.9125	25.1762	17.5509	22.8406	22.1425	19.3869	30.2691	24.9847	12.3149	19.8739	18.5416	32.5328	18.3114	23.8675	19.0526	14.5891	10.555	16.0123	18.118	13.1005	9.27613	21.1235	13.6676	6.02366	4.83509	1.16686
ENSG00000059573	ALDH18A1	583.147	549.113	598.513	590.461	589.233	595.163	683.512	767.233	606.284	593.454	623.352	681.728	649.607	574.451	683.567	612.204	616.046	609.537	618.256	701.252	691.94	558.292	792.661	671.401	450.407	447.433	427.113	454.787	456.11	448.074
ENSG00000059588	TARBP1	199.893	220.089	162.164	184.831	173.861	200.402	186.235	143.273	164.487	191.715	187.29	170.431	198.577	174.133	165.638	158.721	177.882	145.959	157.184	151.727	160.671	104.614	102.668	134.28	121.62	140.183	120.568	93.3667	101.537	86.3477
ENSG00000059691	GATB	83.4139	68.9169	84.8546	97.1836	76.1541	90.2095	79.3847	96.5535	63.2644	93.7033	82.6956	88.3387	76.1982	80.4419	79.1108	83.7966	75.8614	78.0283	76.2103	75.6149	83.2674	81.1289	92.0997	78.1438	70.9143	76.8127	83.1406	84.3312	91.8667	95.6826
ENSG00000059728	MXD1	12.0236	15.5619	11.2929	16.9845	12.177	8.05638	10.7256	12.4585	12.6529	15.0787	13.2668	10.7077	23.86	21.7666	24.7221	26.6177	24.8511	36.7192	28.5789	21.4095	31.6651	18.1473	7.54915	7.64196	52.5648	36.486	55.65	28.1104	33.0408	29.1716
ENSG00000059758	CDK17	284.058	271.221	224.048	237.783	261.806	250.755	134.557	67.4836	191.902	142.171	171.21	148.124	165.481	139.117	165.638	239.56	265.515	257.034	230.536	205.22	218.137	241.252	61.9031	87.3367	222.627	203.554	216.729	214.844	198.239	227.538
ENSG00000059769	DNAJC25	54.4732	58.5976	58.8317	63.3001	65.9741	54.72	74.008	65.0477	85.8077	80.5137	84.6574	87.722	78.1518	74.2384	76.6208	120.323	139.598	101.649	68.9223	82.8996	78.5756	73.5297	46.8047	44.7581	58.4244	60.2198	62.3703	50.8622	57.7274	67.0914
ENSG00000059804	SLC2A3	3509.92	3424.6	3252.07	3699.44	3872.16	3683.36	2993.91	3321.28	2891.3	2442.39	2531.88	2555.02	2309.94	3490.51	2460.02	1987.52	2025.24	2014.96	1818.43	1878.21	2017.27	2625.89	3256.33	3029.29	11288.5	8710.98	10552.7	16519.3	16818.7	16394.4
ENSG00000059915	PSD	21.0413	17.785	15.839	19.2137	17.589	21.2267	15.6326	15.5731	10.5765	11.9108	12.5333	12.573	13.8542	10.5578	12.5124	7.00113	6.53977	13.9028	5.78484	6.98604	8.39893	1.06749	1.50983	3.31591	5.22521	8.79655	3.02188	5.11617	4.02924	11.8715
ENSG00000060069	CTDP1	147.29	173.404	166.229	163.85	148.83	155.085	214.511	252.285	192.956	230.489	195.804	209.693	192.42	191.168	187.888	163.65	177.882	195.53	204.815	179.932	180.608	200.687	240.063	235.809	189.645	213.155	209.407	174.686	166.005	198.366
ENSG00000060138	YBX3	922.054	940.382	827.08	946.117	936.389	971.505	1111.87	1092.65	1132.25	1065.22	981.693	999.151	955.455	995.048	1025.97	1110.94	1124.55	1119.28	1086.25	1082.13	1078.9	977	1035.08	1091.52	817.289	793.054	854.665	612.989	583.434	550.133
ENSG00000060140	STYK1	18.0354	11.1156	11.7445	14.9863	13.53	13.0916	6.82536	7.26747	9.48966	5.38525	13.2427	15.1693	8.46647	12.3029	6.18054	5.91505	6.53977	6.42586	4.76315	20.4248	12.9006	12.8098	18.118	15.2839	36.0739	31.6852	40.0265	41.1617	41.9041	33.839
ENSG00000060237	WNK1	1307.56	1156.02	1248.97	1223.88	1175.76	1224.57	1312.42	1271.81	1277.94	1325.85	1061.31	1235.85	1375.41	1362.78	1258.36	1018.37	1215.09	1072.2	1386.07	1349.01	1504.68	1251.09	1182.2	1203.06	1334.74	1327.9	1316.98	1158.55	1142.69	1171.53
ENSG00000060339	CCAR1	674.825	738.077	644.591	490.552	535.79	705.939	756.641	468.232	987.977	1096.44	1153.06	1032.41	1040.6	960.571	969.107	929.648	1141.84	1040.99	1073.61	995.95	894.831	1046.14	348.771	475.984	1243	1194.44	1162.24	887.485	878.374	865.81
ENSG00000060491	OGFR	75.1476	97.8175	95.7624	86.9206	81.1802	83.5849	104.331	104.859	80.1348	82.9329	84.186	91.9079	102.367	84.2274	97.6525	98.5842	124.256	95.4699	80.0208	80.7265	89.1313	86.4664	108.708	117.904	99.9762	89.2947	99.5782	75.2957	90.2551	127.188
ENSG00000060642	PIGV	70.6388	68.9169	81.3078	78.9279	79.8272	94.6625	37.052	37.3755	39.013	32.3115	27.4314	30.3386	30.7871	28.3912	24.7221	33.5186	26.1591	24.7855	21.9105	39.877	34.0106	39.497	45.2949	37.1181	42.2579	36.486	26.3589	77.3036	76.5556	87.5145
ENSG00000060656	PTPRU	225.443	188.966	231.727	199.817	212.422	206.445	162.834	161.961	126.529	118.475	104.05	136.524	151.627	133.439	133.5	298.71	321.756	309.36	403.915	415.304	422.2	471.829	614.501	544.762	467.929	534.808	500.82	182.718	199.045	215.869
ENSG00000060688	SNRNP40	331.401	324.576	342.366	382.598	347.045	324.125	459.664	493.149	422.369	390.969	372.689	434.495	377.143	400.316	430.614	465.172	389.634	425.943	462.979	462.961	456.008	457.876	567.697	514.097	426.703	412.868	431.976	295.159	292.499	292.853
ENSG00000060718	COL11A1	84.1654	77.8094	76.3389	56.948	56.1496	69.4863	52.6528	44.643	50.6115	45.2361	63.376	66.031	51.5685	47.3188	71.6942	54.2213	58.8579	43.1451	77.1629	80.7265	80.9218	112.086	81.5308	89.5201	70.0863	57.6095	68.8261	69.272	50.7685	51.3419
ENSG00000060749	QSER1	1596.91	1954.14	1586.86	1505.62	1429.43	1496.46	1451.86	781.77	2168.89	2143.32	1877.61	2020.19	2334.39	2050.79	2301.65	2236.9	3048.81	1954.42	2260.61	1730.26	1550.41	2383.68	794.17	871.185	1381.11	1480.57	1437.51	1122.41	1087.89	1122.52
ENSG00000060762	MPC1	37.5738	42.2394	34.7817	28.9735	35.8546	38.2678	44.8524	40.4902	60.1012	36.6197	48.2415	68.7079	60.0349	42.5869	50.6804	60.1363	52.3182	57.8328	40.9631	43.7674	38.7017	39.497	27.1769	31.6595	27.8284	31.6852	26.359	24.0946	37.069	36.1727
ENSG00000060971	ACAA1	59.364	55.5781	69.1054	65.9394	60.2086	54.1332	97.3702	84.5848	76.9717	94.3184	76.4633	100.693	92.4916	105.944	123.503	91.5612	100.573	115.664	120.636	104.327	104.377	106.205	137.395	117.809	77.3871	79.6932	88.3375	164.647	140.459	155.192
ENSG00000060982	BCAT1	5728.48	6433.76	4942.65	4278.08	4502.72	4873.18	3700.36	1789.88	5423.81	4901.62	5039.87	4565.89	4732.73	4084.51	4456.24	4122.84	4851.28	3662.77	3646.67	3166.8	3057.44	3287.87	1147.47	1295.85	2504.39	2343.76	2502.62	1196.7	1185.4	1130.69
ENSG00000061273	HDAC7	154.281	176.169	191.592	193.113	170.047	189.325	213.536	214.042	173.754	234.797	229.297	248.812	241.662	246.834	215.648	241.757	247.203	239.896	268.641	287.3	262.649	236.975	278.473	285.358	160.883	171.951	177.905	191.375	181.534	160.451
ENSG00000061337	LZTS1	48.0945	60.0244	69.1116	76.9297	54.7966	46.3242	72.1538	85.1332	50.6115	52.7754	50.1333	61.5694	76.9678	69.0854	65.5137	58.1647	57.55	65.1766	30.4841	38.9043	48.084	16.0123	18.118	13.1005	6.18409	5.76095	5.36941	22.0867	21.7579	29.1715
ENSG00000061492	WNT8A	0	0	0	16.9845	12.177	5.03524	0	0	1.05441	0	0	0.89231	0	0	0	0.985842	2.61591	0.91798	1.90526	1.94522	0	6.40491	1.50983	8.73367	6.18409	12.4821	9.76257	27.1065	24.1755	40.8401
ENSG00000061676	NCKAP1	1880.91	2109.73	1772.46	2127.09	2083.65	1973.8	1327.06	711.172	1935.87	1854.7	1936.25	1798.92	1821.09	1685.46	1822.01	1711.4	1852.05	1670.72	1588.02	1449.2	1340.48	2005.84	561.654	673.583	2305.62	2107.5	2236.04	1858.33	1995.25	1936.98
ENSG00000061794	MRPS35	328.397	395.716	321.617	335.693	314.572	341.389	400.745	335.342	400.674	440.512	407.687	367.633	364.827	367.194	370.831	465.317	439.473	415.846	404.866	371.537	379.981	345.865	193.258	274.018	283.438	276.525	276.768	246.969	222.414	212.369
ENSG00000061918	GUCY1B1	21.0413	22.2313	18.0684	25.9763	34.5016	13.0916	13.6507	17.6496	27.4146	18.3098	10.405	16.9539	10.0058	19.8739	13.5972	9.85842	14.3875	6.42586	17.1473	15.5617	19.9373	22.4172	21.1376	19.6508	18.5523	21.1235	14.6439	59.2326	55.6035	79.3465
ENSG00000061936	SFSWAP	236.715	235.651	256.119	254.767	246.246	219.536	236.938	227.368	235.133	231.566	207.155	240.924	247.837	231.862	191.597	197.168	226.276	202.874	220.057	210.083	221.656	198.552	249.122	235.809	204.075	197.793	199.645	219.864	224.026	231.038
ENSG00000061938	TNK2	90.1165	100.041	108.862	97.9106	110.946	101.667	106.281	100.537	76.9717	80.7788	86.0779	80.308	91.5918	103.155	109.824	105.445	105.944	98.2239	89.5145	95.3156	79.749	98.2087	132.865	98.2537	193.671	139.177	166.387	147.58	143.306	179.697
ENSG00000061987	MON2	243.479	224.536	232.179	246.774	224.599	241.691	172.584	150.54	217.208	191.715	197.695	199.877	196.268	218.613	207.666	205.055	198.809	152.385	219.105	175.069	209.928	167.595	90.5898	129.913	242.21	260.203	268.471	361.419	374.719	359.393
ENSG00000062038	CDH3	569.301	517.988	582.846	526.328	520.144	616.035	424.922	458.769	330.942	373.717	343.212	418.338	370.969	436.215	368.119	338.116	295.355	345.882	274.104	310.995	296.388	300.859	384.445	332.65	439.817	466.283	465.891	1430.18	1409.35	1396.36
ENSG00000062194	GPBP1	749.975	855.903	754.354	739.326	793.535	758.306	415.372	238.788	627.372	630.075	660.246	585.356	569.563	577.289	630.414	551.085	619.971	527.838	521.087	444.482	413.992	519.865	152.493	187.774	583.366	636.585	667.274	745.928	750.244	743.291
ENSG00000062282	DGAT2	18.0354	13.3388	20.3269	3.99635	12.8535	21.148	15.6008	14.5349	8.43525	16.1557	17.0264	10.7077	13.8542	15.1089	18.5416	26.6177	24.8511	19.2776	29.5315	23.3426	30.4923	18.1473	21.1376	22.9235	18.5523	16.3227	23.4302	1.00394	4.02924	2.33372
ENSG00000062370	ZNF112	60.8696	82.2556	74.0804	66.9389	70.3562	71.5003	32.1767	15.5731	45.3395	49.5443	48.2414	52.6463	49.2594	45.426	46.9721	41.4053	58.8579	47.7349	38.1052	39.877	57.4662	50.1718	16.6081	18.559	44.3193	69.1314	54.6704	92.3627	82.1965	82.8471
ENSG00000062485	CS	501.498	512.312	540.037	584.279	538.374	524.449	656.834	741.523	532.986	601.062	529.681	603.303	610.333	636.646	589.087	625.41	543.647	621.378	669.833	691.959	692.833	604.235	770.716	724.986	646.461	692.534	640.172	582.458	533.785	512.221
ENSG00000062524	LTK	0.751477	0	1.80684	0	0	1.00705	0	0	0	0	0	0	0.769679	1.89275	0	3.94337	3.92386	0.91798	9.52629	4.86304	7.03668	1.06749	4.52949	6.55025	4.12273	7.68127	11.7151	3.01183	6.44679	2.33372
ENSG00000062582	MRPS24	105.811	97.8175	119.251	115.894	133.271	119.839	164.784	170.266	119.148	149.71	172.153	173.108	171.638	149.527	163.166	186.324	142.567	180.842	180.047	185.768	200.545	141.976	238.553	182.315	163.875	120.02	140.581	88.3469	83.0024	87.5145
ENSG00000062598	ELMO2	134.43	100.041	111.572	115.894	147.477	138.961	117.968	126.662	84.3525	115.244	116.347	127.523	113.098	131.51	116.194	97.5983	111.176	121.173	122.889	142.948	127.791	131.256	129.805	134.28	152.525	143.064	126.323	139.548	118.428	154.007
ENSG00000062650	WAPL	689.854	749.193	646.395	671.386	679.208	593.151	745.914	507.685	827.707	777.631	796.456	815.572	725.81	772.243	671.206	705.863	723.298	680.222	762.104	632.195	650.892	693.864	314.045	394.107	823.516	819.976	861.546	810.181	743.797	775.962
ENSG00000062716	VMP1	332.904	364.593	321.617	346.684	343.664	332.326	362.72	379.984	343.737	397.431	374.581	364.063	393.305	332.177	367.124	400.251	372.767	369.946	365.81	360.838	368.253	356.54	413.693	391.923	371.045	368.701	377.323	392.542	387.614	410.735
ENSG00000062725	APPBP2	159.313	164.511	137.32	155.858	135.977	159.113	109.206	91.3624	168.705	104.474	113.509	116.893	108.525	110.726	116.194	98.5842	95.4807	114.747	118.126	113.795	118.451	139.841	48.3146	101.529	162.848	179.55	177.679	240.946	212.744	222.87
ENSG00000062822	POLD1	213.315	244.544	297.677	273.75	298.337	264.852	286.577	328.063	258.33	281.11	273.368	272.154	271.667	281.073	310.263	299.696	273.363	333.227	301.031	320.961	272.085	244.396	389.536	386.465	211.704	248.681	256.756	182.718	192.598	187.865
ENSG00000063015	SEZ6	12.0236	2.22313	12.1962	2.99726	2.70601	7.04933	4.87526	1.03821	1.05441	2.1541	3.78364	3.56924	3.07871	4.73188	1.23611	0.985842	2.61591	7.34384	3.81052	2.91783	2.34556	2.13497	3.01966	3.27512	1.03068	0	0	0	0.805849	0
ENSG00000063046	EIF4B	1819.49	2098.35	2048.54	2566.43	2442.31	2042.32	2789.72	3047.93	2518.6	2653.9	2746.01	2644.49	2621.73	2658.22	2651.61	2606.33	2290.63	2512.38	2337.9	2436.22	2500.72	2375.93	2553.12	2693.52	2474.74	2592.3	2488.54	2994.21	3053.76	2888.37
ENSG00000063169	BICRA	70.6388	55.5781	64.1428	68.9371	59.5322	63.444	64.3534	66.4454	56.9379	56.0066	48.2414	62.4617	61.5743	78.5491	63.0415	67.0372	73.2455	56.9147	58.1104	64.1922	52.7751	52.3068	81.5308	66.5942	72.1477	66.2509	66.3855	68.2681	86.2258	85.1809
ENSG00000063176	SPHK2	116.224	151.12	128.142	128.176	124.721	109.333	164.582	182.676	150.156	159.575	191.762	142.909	189.136	189.818	195.565	113.514	144.223	130.749	112.953	112.856	117.837	112.528	177.929	147.042	145.264	136.084	156.833	301.517	319.841	326.864
ENSG00000063177	RPL18	1277.77	1227.17	1479.32	1448.62	1432.81	1384.67	1533.73	1822.01	1284.24	1482.01	1444.4	1457.12	1459.2	1425.18	1379.04	1558.56	1398.2	1626.63	1610.89	1629.1	1619.6	1446.29	2015.57	1878.77	1366.46	1356.17	1346.24	1428.61	1515.77	1453.91
ENSG00000063180	CA11	156.307	93.3713	145.451	93.9142	110.946	139.98	150.158	150.54	141.29	134.631	150.4	140.093	151.627	137.224	119.902	148.862	134.719	146.877	133.368	148.809	189.99	120.626	126.826	136.464	113.375	121.94	96.1613	63.2484	64.4679	58.3431
ENSG00000063241	ISOC2	136.017	122.272	141.837	124.886	133.271	161.128	169.659	157.808	166.596	137.862	139.995	148.124	153.936	132.492	150.805	158.72	128.18	144.123	123.842	171.179	163.016	119.558	173.631	158.298	83.4852	95.0557	84.4462	63.2484	63.6621	57.1762
ENSG00000063244	U2AF2	474.933	578.013	557.41	614.439	564.203	585.094	849.271	944.771	769.716	811.02	841.861	828.957	865.12	814.828	847.97	915.848	750.766	934.506	1030.74	1043.61	1046.12	981.023	1171.63	1155.02	894.631	887.187	903.526	662.601	644.68	696.616
ENSG00000063245	EPN1	338.916	377.932	361.819	306.72	362.604	349.445	387.095	385.175	362.716	353.272	285.665	361.386	363.289	371.925	395.554	346.03	387.154	369.946	368.667	369.591	418.683	390.699	462.008	450.877	385.475	361.02	364.143	348.368	370.69	371.062
ENSG00000063322	MED29	212.668	191.189	200.56	180.835	206.333	214.501	274.965	250.208	216.153	286.496	234.586	276.616	238.6	267.824	258.346	276.036	311.293	272.64	281.026	302.481	307.269	277.546	392.556	364.63	225.719	240.999	256.267	232.915	213.55	203.034
ENSG00000063587	ZNF275	134.514	144.503	135.965	138.873	129.888	131.923	130.657	151.579	99.1142	129.246	95.537	125.816	103.907	123.975	107.541	92.6691	95.4806	94.5519	116.221	114.768	109.069	118.491	117.767	113.538	105.13	102.737	112.758	110.434	82.1965	105.017
ENSG00000063601	MTMR1	154.053	144.503	135.061	127.883	136.653	128.902	189.16	188.954	199.283	175.559	163.643	177.57	166.251	188.329	158.222	159.706	194.885	156.057	200.052	203.275	200.545	164.393	202.317	174.673	190.676	182.43	178.167	173.682	188.569	213.536
ENSG00000063660	GPC1	123.242	184.519	169.843	170.844	179.273	137.965	204.761	243.979	227.752	189.561	185.398	185.601	191.65	234.701	210.138	203.083	231.508	211.135	163.852	183.823	215.792	168.663	229.494	242.359	259.732	302.45	285.555	281.104	249.813	295.216
ENSG00000063761	ADCK1	28.5561	31.1238	32.9748	24.9772	31.7956	40.2819	35.1019	35.2991	26.3602	36.6197	28.3773	30.3386	33.8659	39.7477	34.611	23.6602	30.0829	24.7855	27.6262	33.0687	30.4923	40.5645	40.7654	34.9347	17.5216	25.9243	20.9895	31.1222	29.0106	15.1692
ENSG00000063854	HAGH	48.0945	48.9088	44.2676	38.9644	30.4426	42.296	30.2266	38.4137	24.2513	32.3115	29.3818	27.8424	25.4586	24.6057	24.8662	41.4054	26.1591	30.3497	34.2946	35.0139	32.8378	27.7546	48.3146	34.9862	51.6849	46.2211	37.6154	49.2435	55.6599	59.5099
ENSG00000063978	RNF4	247.236	273.444	327.039	323.705	280.072	277.945	408.546	436.047	374.315	418.972	400.119	352.395	385.547	349.213	353.527	338.081	374.075	372.7	356.169	365.7	364.734	353.338	412.183	370.088	338.063	357.179	346.528	274.076	281.241	309.218
ENSG00000064012	CASP8	25.5502	17.785	30.2646	12.9881	30.4426	35.2467	14.6258	20.7642	18.9793	18.3098	24.5937	19.6308	21.551	21.7666	25.9582	22.6744	24.8511	16.5236	26.6736	16.5343	28.1467	24.5522	16.6081	16.3756	26.7977	30.7251	23.4302	12.0473	17.7287	17.5029
ENSG00000064042	LIMCH1	15.781	13.3388	10.841	4.99544	8.79452	10.0705	11.7006	6.22926	8.43525	14.0016	19.8641	20.5231	13.0845	28.3912	14.8333	22.6744	18.3114	22.9495	10.4789	10.6987	16.4189	8.53989	9.05898	4.36683	29.8898	23.0438	25.3827	126.497	129.742	123.687
ENSG00000064102	INTS13	399.786	415.725	373.563	342.687	345.692	412.888	222.312	113.165	288.907	289.727	349.041	290.893	299.405	240.379	299.138	261.248	300.83	273.558	215.294	245.098	204.064	272.209	66.4325	102.621	189.645	178.589	171.333	117.461	148.276	131.855
ENSG00000064115	TM7SF3	359.031	364.198	329.826	360.671	384.191	354.674	357.678	403.692	379.957	313.549	361.875	300.102	302.7	348.358	339.481	297.085	290.676	290.523	339.793	337.374	345.837	308.405	324.637	390.676	224.265	227.58	227.214	193.326	168.921	136.119
ENSG00000064195	DLX3	1.50295	0	1.80684	0.999087	3.38251	0	0.975052	1.03821	1.05441	0	0.945911	0.89231	4.61807	9.46375	9.88886	1.97168	5.23182	4.5899	0.952629	2.91783	0	0	3.01966	1.09171	72.1477	69.1314	76.1481	27.1065	30.6222	29.1715
ENSG00000064199	SPA17	33.7477	20.0081	35.9037	40.9626	39.8082	37.3718	32.7429	36.3373	44.0921	38.7738	42.3506	27.1947	22.0936	26.7271	28.1607	19.7229	22.2352	32.7682	34.106	35.8881	32.8378	39.3121	20.8449	31.6595	50.2428	42.0018	42.7293	63.3939	65.9081	54.3936
ENSG00000064225	ST3GAL6	30.8105	31.1238	29.3611	57.9471	50.7376	46.3242	23.4012	31.1463	35.0742	31.2344	41.6201	32.1232	29.2478	47.3188	43.2638	42.3912	39.2386	41.3091	52.3946	43.7674	43.3929	67.2516	43.7851	54.5854	138.117	143.064	134.235	175.69	194.21	172.695
ENSG00000064270	ATP2C2	21.7928	8.8925	11.3992	7.9927	9.47102	21.082	7.61596	14.5349	8.43525	6.01203	13.2427	2.67693	8.46647	8.51737	8.65275	6.99874	6.53977	5.50788	9.55743	7.78087	3.51834	9.60737	16.6081	14.1922	12.8718	12.4821	11.1895	12.4424	13.0805	13.1865
ENSG00000064300	NGFR	71.3903	60.0244	53.3017	50.9348	45.3256	76.5356	25.3514	32.1845	20.0337	12.9246	19.8641	14.277	17.6707	17.9811	19.7041	16.7593	10.4636	14.6877	10.4789	13.6165	9.38224	11.7423	16.6081	15.2839	13.3989	24.004	16.1082	10.0394	12.8936	10.5017
ENSG00000064309	CDON	106.71	150.466	136.416	123.887	117.035	95.6695	135.532	156.77	141.29	113.09	97.4288	111.539	114.682	192.114	123.611	89.7116	104.636	88.1261	101.931	89.48	90.3041	89.6688	135.885	96.0703	72.1477	77.7728	89.3275	730.871	712.371	842.472
ENSG00000064313	TAF2	332.904	375.708	311.228	268.755	302.396	300.1	289.591	122.509	294.179	288.649	283.773	306.062	286.321	301.894	301.61	254.347	321.757	263.46	297.22	290.81	295.541	291.424	69.4522	112.446	356.616	318.773	310.938	273.072	295.746	304.551
ENSG00000064393	HIPK2	265.271	253.436	249.795	251.77	257.071	236.656	335.418	340.533	305.778	322.038	268.639	330.155	339.428	348.266	300.374	230.687	261.591	268.968	262.926	282.057	297.886	286.086	220.435	256.551	275.192	316.852	330.951	528.074	472.227	462.077
ENSG00000064419	TNPO3	961.139	822.557	878.585	863.214	886.213	978.843	966.279	1033.02	916.278	901.494	966.721	964.58	937.475	947.318	861.566	911.906	869.791	912.472	974.546	900.632	967.544	890.283	1022.16	1007.64	826.61	873.743	848.371	639.51	549.586	637.104
ENSG00000064490	RFXANK	45.6942	62.7023	60.6102	46.5882	53.181	57.4073	61.6164	65.4473	63.2609	72.6633	78.2285	72.3036	56.053	69.8481	77.1419	66.2574	74.2448	74.643	74.642	68.0162	76.3466	73.1199	103.844	86.6292	65.0294	89.2561	75.4134	99.5497	95.6027	100.579
ENSG00000064545	TMEM161A	96.9405	104.487	100.731	77.9288	92.6807	100.705	65.3285	69.56	68.5364	64.623	53.9169	58.0002	54.6472	73.8172	48.2082	61.1222	44.4704	64.2586	64.7788	62.2469	49.2568	44.8344	46.8047	72.0527	44.3193	49.9282	56.1348	54.2129	59.6328	50.175
ENSG00000064547	LPAR2	53.3549	44.4625	55.5603	65.9398	59.5321	48.3383	98.4802	91.3624	85.4069	102.32	89.8615	100.831	110.834	90.8521	91.4719	91.6833	83.7091	96.3879	117.173	103.096	120.796	86.4663	99.6488	124.455	75.2397	86.4143	92.7443	73.2879	87.0316	85.1809
ENSG00000064601	CTSA	62.1745	79.7519	88.361	64.6819	68.4693	75.0003	122.222	120.414	94.7972	126.762	113.128	108.813	148.857	118.078	138.556	127.454	113.295	154.196	137.707	152.021	149.808	121.02	167.114	158.208	124.989	128.444	135.501	141.839	132.08	137.028
ENSG00000064607	SUGP2	538.343	540.22	584.874	560.032	563.925	570.257	547.02	567.498	505.582	545.162	549.781	550.318	479.982	526.727	519.466	525.63	539.849	534.378	569.991	573.902	568.866	521.087	602.645	545.276	534.203	465.907	514.997	602.366	555.23	616.961
ENSG00000064651	SLC12A2	181.106	242.321	178.425	175.839	177.92	141.994	164.784	96.5535	239.351	225.103	229.856	219.508	217.819	257.414	223.735	197.168	251.127	167.072	181	163.398	189.99	210.295	95.1193	89.5201	210.259	215.076	209.407	1124.41	1125.77	1207.71
ENSG00000064652	SNX24	128.502	75.5863	110.217	80.9261	97.4162	108.761	61.4283	57.1015	66.4276	68.9312	69.9974	86.5541	59.2653	71.9245	72.9303	82.8107	78.4773	76.1924	64.7788	64.1921	83.2674	40.5645	48.3146	54.5854	71.117	65.2908	64.433	164.647	173.257	140.023
ENSG00000064655	EYA2	6.76329	6.66938	7.22735	4.99544	5.41201	5.03524	9.75052	3.11463	2.10881	7.53935	2.83773	1.78462	3.84839	5.67825	1.23611	3.94337	3.92386	1.83596	0	0.972609	0	6.40491	6.03932	3.27512	16.4909	18.243	20.9895	74.2918	66.8854	74.6791
ENSG00000064666	CNN2	746.968	758.085	862.312	799.268	761.062	732.111	992.558	1191.86	843.525	984.421	837.134	971.722	1069.09	1023.98	1044.51	1060.76	1034.42	1164.92	1036.46	1136.97	1095.38	825.164	1173.14	1107	636.962	747.965	651.163	829.068	724.232	747.727
ENSG00000064687	ABCA7	57.8637	55.5781	57.3671	53.9507	60.2087	62.4369	38.027	44.643	25.3058	34.4656	34.0528	31.2309	25.3994	36.9086	32.1388	18.731	27.467	32.1293	25.721	35.9865	26.9739	32.0246	30.1966	37.1181	37.1045	28.8048	39.0503	95.3746	93.4784	92.182
ENSG00000064692	SNCAIP	54.8578	82.2556	60.5291	52.9516	47.3551	62.4369	30.2266	34.2609	46.3939	28.0033	31.2151	35.6924	37.7143	29.3376	28.4305	18.731	31.3909	15.6057	20.9578	21.3974	12.9006	11.7423	15.0983	13.1005	11.3375	8.64143	12.6913	10.0394	8.05849	5.83431
ENSG00000064703	DDX20	319.377	366.816	317.808	306.72	313.897	321.248	375.25	300.043	324.757	388.815	399.396	367.784	402.331	332.351	423.985	402.24	446.012	395.649	354.132	376.399	403.872	358.675	264.22	322.054	381.352	390.913	373.934	204.819	237.872	270.739
ENSG00000064726	BTBD1	443.371	480.195	407.894	443.595	451.227	442.094	469.975	254.361	593.631	538.525	570.384	507.725	484.898	476.027	533.985	555.029	646.129	506.725	483.919	444.482	412.818	452.603	134.375	211.791	432.886	442.633	448.102	430.691	437.576	439.907
ENSG00000064763	FAR2	200.169	213.42	173.45	175.795	198.853	181.244	171.669	106.931	187.661	175.489	203.591	159.571	161.624	161.738	152.646	169.55	138.643	173.461	134.275	109.752	137.172	114.195	54.3539	84.0067	98.9087	104.657	91.712	105.291	115.119	119.193
ENSG00000064932	SBNO2	96.9405	146.726	130.996	111.898	110.946	100.705	117.981	115.241	114.93	116.321	63.376	105.293	89.2828	119.243	114.958	113.372	112.484	94.552	108.6	112.823	107.896	97.1412	155.513	144.105	124.712	149.785	121.544	162.639	140.218	155.192
ENSG00000064933	PMS1	476.437	620.253	425.51	436.601	464.081	496.475	225.237	151.579	317.376	372.659	499.441	295.355	364.058	242.272	417.804	243.503	380.673	248.773	229.584	187.713	159.498	329.853	73.9817	106.987	267.977	308.211	286.531	255.001	233.696	227.538
ENSG00000064961	HMG20B	169.082	213.42	209.593	242.778	249.629	236.656	209.636	242.941	243.568	182.021	208.1	183.816	180.86	203.471	186.652	195.197	213.197	185.432	190.526	177.015	227.519	194.282	237.043	252.185	181.4	196.832	207.455	233.919	239.327	242.707
ENSG00000064989	CALCRL	22.5443	22.2312	20.3269	23.9781	29.0896	39.2748	0.975052	3.11463	6.32644	9.69345	8.5132	6.24617	9.23614	6.62463	7.41664	3.94337	5.23182	1.83596	2.85789	1.94522	1.17278	7.4724	0	2.18342	3.09204	3.84063	3.4169	9.03548	5.64094	5.83431
ENSG00000064995	TAF11	179.603	202.304	177.07	188.828	193.479	214.501	299.341	319.769	300.506	247.722	274.314	274.832	267.08	239.432	258.346	296.739	253.743	283.656	252.447	275.248	241.593	279.681	277.809	289.302	265.916	238.119	227.955	227.895	232.89	243.874
ENSG00000064999	ANKS1A	211.917	206.751	241.213	265.757	244.894	224.571	336.393	352.992	256.221	275.725	247.829	286.432	276.314	463.723	279.36	219.843	231.508	209.3	220.057	243.152	215.791	241.252	339.712	308.954	253.548	248.681	261.148	2475.72	2491.66	2498.27
ENSG00000065000	AP3D1	698.873	706.954	776.485	677.383	675.825	688.817	781.992	963.459	752.846	762.552	626.193	767.386	755.055	778.867	704.581	687.132	733.764	678.386	743.053	647.757	789.28	707.741	1008.56	962.887	701.895	701.875	662.882	705.773	733.323	731.623
ENSG00000065029	ZNF76	65.3785	60.0244	60.9808	48.9553	52.0906	63.444	42.9023	58.1397	32.6866	45.2361	58.6464	51.754	54.6472	63.4071	54.3887	51.2638	54.9341	57.8327	60.0156	71.973	79.749	53.3743	83.0407	68.7776	69.0557	79.6932	77.6124	77.3036	83.8082	85.1808
ENSG00000065054	SLC9A3R2	23.2958	22.2313	28.4577	31.9708	37.8841	25.1762	33.1518	33.2227	37.9586	22.618	18.9182	22.3078	18.4723	23.6594	24.7221	24.6461	26.1591	24.7855	16.1947	16.5343	24.6284	17.0798	24.1573	30.5678	11.3375	11.5219	9.27444	7.0276	8.05849	8.16803
ENSG00000065057	NTHL1	93.9346	97.8175	116.089	123.887	93.3573	90.6343	137.482	142.235	123.366	89.3951	107.834	119.57	100.828	105.048	105.069	136.046	109.868	117.501	103.837	108.932	104.377	83.2639	122.296	121.18	59.7795	56.6494	57.5992	25.0986	29.8164	24.5041
ENSG00000065060	UHRF1BP1	752.979	675.83	650.913	701.36	655.529	743.201	314.942	320.807	299.451	254.184	269.585	303.386	270.927	314.197	301.61	309.554	347.916	322.211	310.557	328.742	357.698	301.031	345.751	383.19	287.56	311.091	309.962	289.136	275.6	274.212
ENSG00000065135	GNAI3	836.394	842.564	715.056	819.252	823.302	765.356	791.742	419.437	948.966	909.03	1020.64	886.957	927.463	836.595	929.553	910.918	1031.98	957.453	823.072	793.649	799.836	915.903	253.652	395.198	967.81	959.198	976.257	929.651	908.191	861.143
ENSG00000065150	IPO5	3525.94	4312.76	3759.11	3705.6	3660.54	3363.52	4174.21	3641.01	4197.61	4079.87	4149.71	4064.45	3758.34	3754.29	3893.72	3811.26	3927.79	3977.63	3661.89	3681.26	4012.06	3579.3	2849.04	3232.56	3217.79	3230.93	3116.7	2113.29	2081.51	2009.34
ENSG00000065154	OAT	317.875	371.262	330.202	404.63	450.548	365.559	570.408	507.683	594.684	553.606	508.901	522.892	554.17	533.755	603.222	655.585	676.216	709.6	800.197	816.974	819.775	1203.05	708.069	1001.07	1696.5	1652.44	1707.1	611.402	562.483	530.908
ENSG00000065183	WDR3	382.497	351.254	377.629	353.677	362.605	338.349	495.327	466.156	489.244	459.9	498.494	475.602	448.722	396.531	499.387	396.309	391.078	398.403	442.966	428.921	478.494	372.553	301.966	421.4	272.1	249.641	243.576	184.705	139.412	162.194
ENSG00000065243	PKN2	326.141	386.824	295.418	355.675	315.25	312.185	253.514	148.464	362.716	333.886	369.851	335.509	354.052	302.84	364.652	307.583	340.068	259.789	315.32	267.468	265.048	435.534	93.6094	111.354	465.868	403.267	456.399	519.039	476.257	501.75
ENSG00000065268	WDR18	187.869	191.189	213.207	189.827	202.274	219.536	242.788	237.75	255.166	201.408	252.558	237.355	215.51	230.916	226.207	273.078	274.671	269.886	249.589	276.221	280.294	246.589	359.34	330.787	214.382	236.199	220.146	177.698	174.063	165.694
ENSG00000065308	TRAM2	140.526	146.726	152.203	143.869	137.33	122.86	204.761	238.788	171.841	185.253	174.048	192.439	166.22	225.237	171.819	163.586	146.491	199.202	186.715	160.48	159.498	165.46	227.934	184.381	271.039	266.924	266.509	385.459	375.525	404.901
ENSG00000065320	NTN1	12.0236	11.1156	15.8098	14.9863	10.1475	13.0916	7.80042	11.4203	9.48966	9.69345	3.78364	4.46155	5.38775	10.4101	7.41664	5.91505	6.53977	11.9337	9.52629	0.972609	3.51834	1.06749	1.50983	2.18342	5.15341	0.960159	2.92877	3.01183	2.41755	2.33372
ENSG00000065328	MCM10	213.419	273.444	254.763	271.752	227.981	232.628	330.542	329.112	342.682	326.346	391.607	344.432	373.295	339.748	321.387	348.003	362.303	372.7	337.231	349.167	409.301	405.644	308.006	355.897	348.37	330.295	341.202	193.761	206.297	215.869
ENSG00000065357	DGKA	51.1004	42.2394	43.8158	51.9525	40.5901	49.3453	48.7526	38.4138	18.9793	26.9262	16.0805	34.8001	16.1633	29.3376	21.0138	19.7168	22.2352	20.1956	19.0526	20.4248	16.4189	12.8098	22.6475	13.1005	20.6136	24.9641	18.0608	27.1065	39.4866	26.8378
ENSG00000065361	ERBB3	200.644	197.858	218.628	262.76	252.335	226.586	314.942	327.036	257.275	310.19	309.313	307.847	300.944	341.641	295.43	336.172	332.22	332.309	407.725	389.043	360.043	549.755	696.031	649.566	715.293	769.086	695.585	530.082	514.937	505.251
ENSG00000065413	ANKRD44	9.7692	11.1156	9.03419	16.9845	8.11802	7.04933	4.87526	6.22926	11.5985	10.7705	5.67546	4.46155	3.07871	10.4101	4.94443	12.8159	15.6955	0.91798	9.52629	10.6987	21.11	6.40491	7.54915	3.27512	32.9818	28.8048	29.7758	78.3075	63.6621	65.3442
ENSG00000065427	KARS1	922.199	773.648	923.677	914.169	924.11	866.061	1016	1238.58	925.768	1036.12	1005.55	1042.22	999.817	998.425	1072.94	998.661	933.88	1096.07	1082.19	1125.3	1078.96	1002.32	1399.62	1170.32	741.073	775.806	748.303	642.523	675.299	674.473
ENSG00000065457	ADAT1	117.23	140.057	141.837	124.886	126.506	145.015	147.233	138.069	108.604	123.859	108.78	113.323	125.458	113.565	128.555	118.301	119.024	142.287	125.747	121.576	138.388	122.761	173.631	161.573	108.221	122.9	116.175	131.517	149.082	136.523
ENSG00000065485	PDIA5	75.1477	62.3947	75.4355	75.301	76.4601	87.6133	77.0291	72.6746	84.3525	68.9312	81.3484	71.3849	69.2786	75.726	71.6942	86.7541	70.6304	87.2081	55.7379	74.9004	83.2674	64.0826	84.5505	82.9699	69.9656	72.0119	62.9686	121.898	98.5015	121.764
ENSG00000065491	TBC1D22B	143.484	140.057	153.495	125.849	152.73	170.029	103.356	135.774	90.679	98.0115	104.965	104.365	89.2134	91.7984	86.5275	81.8249	62.7818	88.1261	88.538	93.2259	102.032	99.0423	143.279	146.114	67.9003	97.9362	78.5464	80.2457	77.8741	84.014
ENSG00000065518	NDUFB4	294.11	279.776	322.46	355.576	334.488	339.745	472.804	441.447	384.182	443.582	396.646	433.107	394.744	427.365	413.759	409.628	390.79	423.509	495.917	482.027	491.157	513.463	622.968	629.922	560.818	644.334	593.841	524.662	508.196	492.478
ENSG00000065526	SPEN	547.075	437.956	452.161	440.598	451.227	456.193	526.528	559.595	504.006	556.835	363.23	539.848	496.443	564.039	433.874	355.889	468.248	421.353	457.262	476.578	525.405	496.381	409.164	429.041	513.279	537.689	547.192	473.861	481.897	492.415
ENSG00000065534	MYLK	108.213	122.272	107.83	130.421	120.33	102.719	137.348	142.234	131.204	105.812	107.834	124.031	113.143	118.169	114.958	101.542	107.252	88.1252	89.2822	116.713	97.3407	85.6027	123.806	96.2441	65.9636	74.8924	61.0161	115.453	98.3135	99.1832
ENSG00000065548	ZC3H15	673.322	778.095	665.824	585.466	606.147	663.643	352.969	246.056	496.625	655.924	954.421	535.386	742.742	425.869	755.263	593.477	830.55	688.485	449.641	422.112	363.562	756.848	203.827	230.35	672.004	632.744	644.326	396.558	411.789	431.739
ENSG00000065559	MAP2K4	210.689	253.26	232.006	257.421	256.232	204.298	343.887	256.19	359.769	372.511	382.064	399.516	386.35	381.024	366.177	461.272	486.4	474.572	519.783	485.024	481.568	501.547	231.703	337.114	529.426	491.29	522.808	398.18	433.868	397.435
ENSG00000065600	PACC1	92.4316	77.8094	88.535	73.9324	79.8272	79.5567	56.553	69.56	65.3732	71.0853	57.7006	71.3848	62.344	71.9245	49.4443	53.2355	41.8546	60.5867	68.5893	49.603	44.5656	65.1166	49.8244	52.402	71.117	60.49	63.4567	56.2208	42.71	67.6779
ENSG00000065609	SNAP91	29.3076	26.6775	14.9064	10.99	8.79452	11.0775	6.82536	2.07642	7.38085	4.3082	4.72955	5.35386	6.92711	4.73187	2.47221	11.8301	3.92386	9.1798	23.8157	14.5891	12.9006	18.1473	12.0786	13.1005	19.5829	17.2829	25.3827	3.01183	1.6117	2.33372
ENSG00000065613	SLK	648.522	680.276	582.711	472.57	461.372	536.757	229.138	144.311	398.566	389.892	471.063	372.985	385.61	398.425	409.152	321.385	377.999	243.264	223.868	177.987	140.734	337.326	83.0407	91.7035	572.028	509.844	530.113	1510.94	1353.01	1381.57
ENSG00000065615	CYB5R4	65.3785	86.7019	63.6911	85.9215	65.6207	59.4158	71.1788	39.452	95.951	86.164	86.0779	80.3079	95.4402	76.6564	96.4164	79.8532	88.9409	66.0946	71.4472	58.3565	58.639	76.859	24.1573	30.5678	86.5773	70.0916	84.4462	87.343	76.5556	81.6803
ENSG00000065618	COL17A1	7.51477	8.8925	4.96881	3.99635	4.73551	10.0705	12.6757	5.19105	10.5441	10.7705	7.56729	11.6	12.3149	7.571	6.18054	6.90089	15.6955	7.34384	15.2421	17.507	10.555	9.60737	21.1376	20.7425	14.4295	16.3227	27.3352	10.0394	15.3111	5.83431
ENSG00000065621	GSTO2	64.627	57.8012	79.5009	55.9489	51.4141	69.4862	28.2765	28.0317	30.5778	18.3098	28.3773	20.5231	22.3207	19.8739	22.2499	35.4903	19.6193	25.7034	23.8157	35.0139	30.4923	37.362	45.2949	37.1181	22.675	31.6852	22.4539	18.071	23.3696	19.8366
ENSG00000065665	SEC61A2	94.5918	73.3631	98.3223	90.7499	101.131	82.6794	66.3035	101.122	91.0592	70.7144	70.8997	73.435	80.3849	82.3346	95.1803	90.9034	73.8884	81.5367	90.2093	82.218	88.7405	97.929	94.968	106.65	90.1017	75.7447	88.5626	67.4806	53.186	78.1797
ENSG00000065675	PRKCQ	77.4021	64.4706	79.0492	65.9398	75.7682	83.585	88.7297	111.088	71.6996	74.3164	86.0778	97.2618	90.8221	91.7983	69.222	64.0797	64.0897	69.7665	40.0104	50.5757	48.084	45.9019	60.3932	42.5766	25.767	32.6454	35.6334	22.0867	21.7579	22.1704
ENSG00000065717	TLE2	22.5443	33.3469	27.1026	15.9854	15.5595	28.1973	16.5759	14.5349	9.48966	9.69345	13.2427	10.7077	16.1633	12.3029	13.5972	20.7027	27.467	20.1956	19.0526	17.507	29.3195	16.0123	30.1966	26.201	22.675	27.8446	30.264	2.00789	1.6117	5.83431
ENSG00000065802	ASB1	144.284	135.611	168.036	166.848	147.477	135.951	220.362	247.094	192.956	187.407	163.643	177.57	190.88	161.83	181.708	164.636	160.878	193.694	187.668	214.947	186.472	194.282	243.083	213.975	160.786	145.944	144.486	154.607	178.092	183.197
ENSG00000065809	FAM107B	329.146	406.832	336.525	356.674	345.692	338.368	291.541	224.253	325.811	304.805	290.395	285.539	291.709	265.931	327.568	338.143	351.839	286.409	286.742	246.07	306.096	327.718	122.296	222.708	562.751	504.083	527.182	411.617	420.653	446.908
ENSG00000065833	ME1	57.1122	88.925	43.8158	52.9516	56.1496	51.3594	54.6029	50.8723	64.3188	73.2394	63.376	62.4617	62.344	63.4071	64.2776	70.9806	69.3216	61.5047	65.7314	84.6169	75.0579	62.9817	54.3539	64.4108	124.712	99.8565	127.402	77.3036	74.1381	79.3465
ENSG00000065882	TBC1D1	497.478	580.236	522.629	513.531	549.319	553.876	460.225	513.914	432.307	381.276	378.364	435.448	383.3	505.365	381.957	362.79	384.539	394.732	382.957	385.153	387.017	398.173	505.793	500.002	582.335	585.697	634.568	1747.86	1695.5	1795.8
ENSG00000065883	CDK13	403.543	460.187	404.732	409.626	422.137	399.798	449.499	406.978	463.939	478.21	455.929	500.586	452.571	476.973	444.998	419.969	461.708	430.533	565.862	536.88	578.181	501.718	468.047	441.05	461.745	454.155	472.021	570.239	571.346	572.929
ENSG00000065911	MTHFD2	2819.7	3023.67	2516.19	2500.56	2684.87	2766.82	1387.54	1349.32	1454.17	1174.82	1255.64	1135.91	1115.2	1062.42	1168.71	1190.35	1244.21	1184.23	1038.37	970.664	993.643	838.525	850.035	894.108	632.839	619.192	605.612	320.184	324.757	329.055
ENSG00000065923	SLC9A7	117.23	117.826	111.121	92.9151	116.358	91.6413	113.106	133.929	101.223	124.938	100.267	113.323	99.2886	124.922	101.361	72.9523	79.7852	71.6024	70.4946	71.973	82.0946	111.019	93.6095	102.621	116.467	145.944	143.51	123.485	124.101	149.358
ENSG00000065970	FOXJ2	134.514	100.041	115.638	125.885	139.359	137.965	107.256	94.4771	83.2981	71.0853	62.4301	69.6002	67.7317	78.5491	67.9859	64.0797	60.1659	84.4542	80.0208	88.5074	79.749	124.896	158.532	115.721	123.682	130.582	136.676	245.966	241.755	231.039
ENSG00000065978	YBX1	2948.95	2910.95	3052.43	3061.86	3051.46	3184.66	3742.68	4000.38	3496.04	3507.6	3559.8	3583.87	3479.77	3300.33	3461.12	3738.02	3356.73	3756.92	3837.64	3854.96	3751.74	3613.62	4285.25	4164.82	2940.59	2958.13	3026.09	2229.96	2265.9	2160.54
ENSG00000065989	PDE4A	24.7987	17.785	22.1338	14.9863	24.3541	29.2044	25.3514	21.8024	22.1425	24.7721	6.62137	14.277	19.242	15.142	29.6666	77.8815	88.9409	67.0125	56.2051	51.5483	53.9479	45.9019	51.3342	36.0264	10.3068	41.2868	27.3352	5.01971	2.41755	2.33372
ENSG00000066027	PPP2R5A	356.199	415.724	344.203	310.716	313.897	339.374	283.74	214.909	324.757	261.723	294.178	250.739	289.4	264.985	271.944	228.716	274.67	250.608	236.252	218.837	224.001	228.442	144.944	181.224	215.412	200.673	231.862	239.942	252.231	227.538
ENSG00000066032	CTNNA2	72.8932	68.9169	63.691	61.9434	43.9726	45.3171	56.553	68.5218	53.7747	36.6197	44.4578	66.0309	38.4839	51.1042	49.4443	49.2921	45.7784	44.063	48.5841	40.8496	49.2567	42.6994	43.7851	43.6683	27.8284	32.6454	24.4064	23.0907	20.9521	10.5017
ENSG00000066044	ELAVL1	544.07	533.55	532.114	602.451	610.882	557.905	827.82	878.326	771.825	744.242	608.221	706.711	669.62	679.496	712	652.627	728.531	702.256	646.836	609.824	662.622	629.816	827.386	756.554	655.515	627.945	660.437	603.369	570.542	592.767
ENSG00000066056	TIE1	12.7751	6.66938	9.4859	12.9881	8.11802	5.03524	3.90021	5.19105	9.48966	6.4623	2.83773	5.35386	6.92711	5.67825	8.65275	8.87258	3.92386	10.0978	7.62103	7.78087	11.7278	16.0123	16.6081	16.3756	3.09204	11.5219	4.88129	2.00789	1.6117	0
ENSG00000066084	DIP2B	246.484	273.444	246.182	270.753	234.07	252.769	399.771	414.246	391.185	431.897	358.5	374.77	397.154	397.478	377.013	331.243	383.231	284.574	404.868	356.947	417.51	383.227	332.163	364.63	329.818	326.453	330.951	661.598	620.504	626.604
ENSG00000066117	SMARCD1	695.868	640.26	753.898	652.404	688.004	650.551	672.785	767.238	583.086	640.845	629.031	698.678	689.634	673.818	676.149	744.312	665.75	727.042	711.614	798.512	779.897	604.195	824.368	765.291	603.98	665.389	590.639	544.136	556.841	554.26
ENSG00000066135	KDM4A	500.946	495.757	572.743	559.294	599.179	646.48	527.403	571.854	451.275	487.904	544.845	556.72	524.871	505.356	583.401	451.463	394.418	463.58	487.022	520.345	533.605	371.445	502.6	485.485	260.751	264.036	258.625	222.875	244.171	233.372
ENSG00000066136	NFYC	192.028	200.081	238.435	198.884	188.068	198.423	107.678	152.595	110.713	146.886	134.319	125.625	130.319	163.254	128.223	137.796	153.031	169.37	165.763	202.158	199.021	172.352	242.134	217.854	165.958	207.337	173.864	150.195	176.955	187.456
ENSG00000066230	SLC9A3	11.4345	7.75815	19.1601	20.654	20.6794	23.8147	14.6599	19.5127	13.1144	14.1694	17.094	11.7398	14.4074	14.2293	25.5464	18.4484	23.6329	10.3524	17.9024	10.2759	22.0436	29.9572	32.2448	20.5168	14.8027	10.8299	12.4101	17.8371	18.1686	12.7942
ENSG00000066279	ASPM	840.156	960.392	874.511	932.152	888.242	896.274	385.146	331.188	752.846	1004.89	1481.31	729.016	1220.71	594.325	1247.23	621.078	1334.11	555.379	460.12	379.318	388.19	1114.46	285.358	306.77	1683.11	1539.12	1604.47	1199.71	1084.67	1137.69
ENSG00000066322	ELOVL1	39.8283	48.9088	39.2988	42.9608	50.0611	50.3524	63.3784	77.8657	56.9379	50.6214	53.9169	62.4617	67.7317	63.4071	64.2776	57.1788	57.55	76.1923	95.2629	113.795	111.414	113.153	149.473	135.372	146.357	125.781	151.808	146.576	120.877	141.19
ENSG00000066379	POLR1H	70.7218	69.65	72.9034	58.269	63.6744	70.2102	66.3941	58.9408	51.1399	54.8757	56.5633	60.6771	61.5743	45.3708	81.5831	65.6592	58.6756	56.6469	64.606	81.636	72.487	69.3866	88.5318	80.5126	34.626	38.6436	48.5337	54.6072	46.2451	36.6035
ENSG00000066382	MPPED2	18.7869	31.1238	16.2615	18.9827	18.942	23.1621	28.2765	24.917	30.5778	34.4656	22.7019	38.3694	22.3207	17.0347	38.3193	30.5611	27.467	30.2933	17.1473	5.83565	10.555	7.4724	3.01966	9.82537	1.03068	2.88048	1.46439	28.1104	29.8164	29.1715
ENSG00000066422	ZBTB11	210.36	253.737	198.144	211.43	206.869	182.01	158.072	89.1779	256.007	187.647	204.724	180.646	187.784	161.932	154.59	196.058	255.738	186.557	197.955	195.469	196.185	241.092	57.9184	83.3804	235.637	247.028	252.31	178.852	188.129	200.754
ENSG00000066427	ATXN3	106.71	126.718	111.572	129.881	130.565	103.726	107.256	84.095	132.855	140.016	125.806	126.708	132.385	112.619	124.847	105.485	137.335	122.091	101.931	82.6717	83.2674	134.503	58.8834	74.2362	150.48	132.502	118.615	140.552	126.518	119.02
ENSG00000066455	GOLGA5	278.046	260.106	257.926	247.774	257.747	280.966	178.434	112.127	197.174	217.564	224.181	203.447	184.723	202.524	165.638	166.607	187.037	142.287	167.663	195.494	178.263	216.7	78.5112	96.0703	273.13	285.167	271.4	373.467	384.389	371.062
ENSG00000066468	FGFR2	505.744	551.335	502.753	439.599	428.225	476.333	440.724	485.882	419.654	474.979	460.658	488.986	493.364	522.399	526.582	396.309	380.614	376.372	377.241	376.399	349.489	287.154	315.554	337.338	198.922	161.307	179.631	472.857	479.48	439.907
ENSG00000066557	LRRC40	407.3	457.964	328.845	441.597	424.843	424.974	164.784	106.936	274.146	308.036	453.091	251.632	324.804	234.701	430.165	265.191	412.006	235.921	181.952	154.645	161.844	343.73	77.0013	79.6947	372.076	378.302	369.025	332.305	350.544	354.726
ENSG00000066583	ISOC1	266.774	277.891	259.281	299.726	305.102	273.917	347.118	388.29	375.369	315.576	346.203	281.078	287.86	281.073	307.791	324.342	249.819	267.132	276.262	297.618	256.839	281.816	288.378	312.229	264.885	296.689	257.244	166.655	157.946	164.527
ENSG00000066629	EML1	90.9286	100.041	103.442	99.9087	118.388	111.782	145.283	142.235	145.508	127.092	101.213	132.954	120.07	127.761	105.069	186.324	164.802	175.334	221.01	186.741	197.027	214.565	241.573	245.634	103.068	116.179	113.246	92.3628	97.5077	80.5134
ENSG00000066651	TRMT11	148.792	162.288	140.933	148.864	147.477	148.036	81.9043	64.369	120.202	127.092	136.211	104.4	123.149	96.5303	137.208	124.216	147.799	109.24	97.1682	81.6991	80.9218	88.6013	24.1573	34.9347	97.9147	79.6932	99.0901	79.3115	85.4199	78.1797
ENSG00000066654	THUMPD1	461.407	569.119	464.357	549.499	500.612	487.412	472.9	210.757	682.199	682.849	712.268	596.064	606.507	581.075	635.357	573.758	659.201	615.048	558.238	523.263	490.224	677.852	166.081	188.865	672.003	670.189	701.442	530.084	604.385	525.086
ENSG00000066697	MSANTD3	136.017	168.958	151.323	164.849	136.653	128.902	192.085	202.451	192.956	208.948	165.534	152.585	190.111	175.08	214.272	247.446	235.432	250.608	262.926	269.413	282.64	224.172	259.188	244.543	182.431	166.107	170.845	146.576	109.595	128.355
ENSG00000066735	KIF26A	484.703	524.658	427.77	356.674	350.428	394.763	381.246	447.469	412.273	424.358	357.554	417.601	401.772	418.298	440.054	379.549	550.648	443.384	261.973	257.741	269.739	166.528	255.161	248.909	148.418	209.315	201.597	166.655	151.499	175.029
ENSG00000066739	ATG2B	243.478	293.453	229.92	217.801	225.952	211.48	207.686	97.5917	190.848	206.794	192.02	201.662	182.414	189.275	164.402	149.848	173.958	123.009	181	184.796	172.399	150.515	69.4522	91.7035	192.737	211.235	200.133	198.781	178.093	175.029
ENSG00000066777	ARFGEF1	1321.85	1131.57	1097.67	1171.93	1309.94	1362.49	917.521	456.812	1206.24	1183.7	1172.96	1135.02	1162.22	1162.14	1176.79	960.212	1059.45	944.6	1020.26	958.027	852.614	1044	314.045	346.384	866.834	904.528	881.574	917.704	928.331	979.111
ENSG00000066827	ZFAT	37.5738	44.8505	42.8751	38.8447	46.6786	38.9853	41.7477	51.9105	33.741	45.1119	45.4037	55.0937	50.0291	46.2762	38.3193	48.3062	39.2386	40.3911	48.5841	64.0655	65.6757	51.2393	77.0013	72.0527	51.5341	51.8486	49.301	56.2208	68.1121	66.5111
ENSG00000066855	MTFR1	203.697	233.428	188.388	249.772	246.247	193.353	190.135	166.258	205.609	191.715	191.074	178.462	184.031	176.972	200.249	172.522	193.577	151.467	173.378	167.379	161.844	182.54	95.1193	139.739	264.06	242.986	276.281	253.998	227.28	221.704
ENSG00000066923	STAG3	16.0255	6.66937	17.2627	23.1894	18.133	21.3091	23.2965	13.2536	17.5857	23.8227	14.8664	22.668	17.8131	28.9942	11.1475	26.9573	17.3722	25.1254	22.1028	40.7611	26.3925	28.2494	41.1306	38.5939	18.5077	25.8008	27.2145	37.5835	36.6774	44.3842
ENSG00000066926	FECH	170.585	220.089	197.397	187.828	167.772	192.346	166.734	170.266	179.249	149.71	143.778	162.401	132.385	150.474	145.861	141.961	134.719	147.795	122.889	127.412	146.598	114.221	146.454	128.822	126.774	127.701	136.188	123.485	107.178	117.853
ENSG00000066933	MYO9A	272.035	286.783	248.892	212.806	213.774	227.593	141.383	83.0568	184.521	203.562	186.344	165.077	197.036	182.65	170.583	142.947	137.335	137.697	142.894	152.085	125.487	144.111	48.3145	63.3191	200.983	197.792	169.834	278.092	300.581	315.052
ENSG00000067057	PFKP	290.07	282.337	335.62	263.759	284.807	258.811	293.491	347.8	241.459	291.88	277.152	313.202	270.157	313.25	280.597	264.206	269.439	288.245	232.442	242.18	208.755	177.203	256.671	266.377	127.805	167.067	131.795	253.997	230.473	264.878
ENSG00000067064	IDI1	176.723	294.905	209.695	388.173	353.422	223.374	797.791	490.472	958.776	949.06	946.869	832.957	854.661	821.822	982.173	1291.2	1368.44	1259.48	1288.32	1259.81	1300.49	979.093	338.859	426.644	1181.71	1100.82	1176.27	804.522	828.005	886.342
ENSG00000067082	KLF6	130.006	146.726	113.831	74.9316	89.2982	95.6695	107.256	122.509	98.0598	102.32	84.186	97.2619	83.1253	109.78	84.0553	111.4	94.1727	91.798	122.889	100.179	137.215	95.0062	81.5308	105.896	274.161	198.753	211.848	510.002	490.759	507.585
ENSG00000067113	PLPP1	88.1852	85.1827	95.8096	72.0718	97.8933	82.3916	99.1169	107.792	85.8734	122.907	100.389	102.435	103.756	104.279	92.4694	101.328	95.6842	98.6326	85.3404	93.5342	95.0183	93.2589	130.231	103.866	404.207	273.123	396.165	308.856	298.017	354.01
ENSG00000067141	NEO1	432.099	431.286	409.249	385.648	366.664	375.628	360.769	393.481	316.322	306.959	319.718	354.248	324.804	348.266	334.985	334.2	371.459	395.65	545.858	536.879	622.745	563.633	762.464	662.668	443.193	480.079	431.994	235.927	262.706	228.705
ENSG00000067167	TRAM1	640.253	818.109	575.932	633.423	706.263	675.727	644.509	330.15	933.146	841.17	967.674	806.642	804.323	775.082	970.35	917.813	979.661	776.609	697.292	669.153	517.198	868.931	229.494	316.596	1042.03	1047.54	1041.19	1326.22	1319.98	1288.22
ENSG00000067177	PHKA1	80.3075	84.4788	73.5159	66.1979	76.2134	82.583	58.5962	70.5982	49.7689	51.6984	54.4519	57.5272	47.3713	53.7038	52.2276	39.7798	60.7352	67.8424	98.2516	102.583	85.3243	121.112	144.445	152.421	134.816	123.156	116.508	63.093	48.2057	67.6779
ENSG00000067182	TNFRSF1A	166.828	157.842	202.366	225.794	211.068	198.388	156.008	179.61	153.943	129.246	120.131	128.493	132.385	157.098	155.749	208.998	205.349	201.038	211.484	256.769	225.174	240.184	297.436	325.329	197.891	216.035	218.193	151.595	135.383	144.691
ENSG00000067191	CACNB1	35.3194	28.9006	43.8158	21.9799	37.2076	31.2185	31.2017	26.9934	17.9249	24.7722	25.5396	31.2309	33.0962	15.142	32.1388	38.5872	37.9307	27.5172	29.5315	23.3426	32.8378	29.8896	43.7851	31.6595	24.7364	24.004	25.8708	9.03548	15.3111	9.33489
ENSG00000067208	EVI5	51.1004	62.2475	57.3671	49.9544	54.7966	58.4088	46.8025	37.3755	72.7541	44.1591	49.1874	49.9694	46.9504	35.9622	48.2082	44.3629	47.0863	30.2933	58.1104	30.1509	28.1467	60.8467	24.1573	12.0088	52.5648	48.0079	62.4805	89.3509	82.1966	82.8471
ENSG00000067221	STOML1	10.5207	17.785	10.3893	12.9881	14.2065	9.06343	4.87526	2.07642	4.21763	4.3082	4.72955	7.13848	3.07871	3.7855	3.70832	5.91505	3.92386	5.50788	9.52629	4.86304	10.555	6.40491	3.01966	7.64196	2.06136	4.80079	3.90503	8.03154	9.67018	9.33489
ENSG00000067225	PKM	1973.21	1778.5	2115.36	2841.39	2671.38	2532.72	2620.93	2979.32	2326.01	2333.97	2337.1	2498.48	2441.14	2585.49	2458.62	2615.17	2121.49	2556.57	2553	2812.47	2756.05	2915.3	3702.01	3515.06	3581.06	3610.03	3508.71	3686.48	3746.42	4080.45
ENSG00000067248	DHX29	411.808	475.749	380.341	358.672	358.546	386.706	282.765	147.426	435.471	468.518	552.41	472.034	447.953	388.96	417.804	429.826	477.403	419.517	406.773	396.817	321.342	483.571	111.728	125.546	542.138	547.291	517.903	423.665	430.322	385.064
ENSG00000067334	DNTTIP2	492.217	553.558	509.075	457.582	477.609	513.594	297.391	208.68	375.369	533.14	861.724	522.003	684.245	398.424	713.235	580.66	770.386	668.289	403.914	304.427	303.75	717.352	173.63	167.031	714.262	633.705	715.11	505.987	489.955	470.245
ENSG00000067365	METTL22	87.9228	57.8013	92.1488	84.9224	75.7682	102.719	64.3534	72.6747	54.8291	53.8525	63.376	59.7848	66.962	56.7825	61.8054	65.0656	60.1659	70.6845	67.6367	69.0552	78.5763	60.8467	80.021	70.961	42.2579	40.3267	54.6704	60.2366	64.4679	52.5088
ENSG00000067369	TP53BP1	434.593	452.246	456.89	513.809	479.647	362.974	823.972	818.033	848.543	836.475	866.23	834.863	906.437	833.145	820.111	700.434	794.394	809.992	616.41	641.868	700.623	553.749	503.536	610.469	539.41	489.26	508.999	534.828	494.613	543.642
ENSG00000067445	TRO	158.562	193.412	200.107	227.792	200.244	155.085	247.663	317.692	236.187	296.189	273.368	284.648	310.95	309.214	294.194	262.234	285.134	284.574	310.557	289.837	309.614	341.595	462.008	395.199	408.151	389.824	395.872	390.534	381.972	414.236
ENSG00000067533	RRP15	418.573	413.501	370.402	327.701	351.781	357.502	351.994	179.61	491.354	470.671	482.415	414.924	437.947	351.105	458.596	378.563	405.466	361.684	347.71	278.166	214.619	291.424	87.5702	127.73	205.106	235.239	245.041	141.556	155.529	126.021
ENSG00000067560	RHOA	1562.33	1760.71	1655.08	1844.32	1868.48	1780.45	2140.24	2408.68	2036.06	2016.23	1734.59	1970.2	1893.38	2009.13	2093.98	2064.37	1912.21	1995.71	1966.21	1938.4	2072.29	1965.23	2521.42	2401.74	2040.75	2022.08	2019.53	2327.12	2396.57	2366.4
ENSG00000067596	DHX8	177.348	155.619	180.684	191.825	192.803	165.156	273.014	337.418	225.643	274.648	243.099	228.431	275.545	268.771	296.666	271.106	275.978	285.491	264.831	276.221	282.64	248.724	359.34	343.888	279.314	319.733	269.447	259.017	228.055	273.045
ENSG00000067606	PRKCZ	122.313	92.659	126.388	114.876	113.535	83.3378	79.4476	81.7571	64.2939	97.3776	96.5212	91.6313	75.1099	90.2535	104.245	71.5269	72.5586	81.3428	93.8242	94.7557	86.9604	97.5072	87.7048	115.789	64.1273	70.5627	64.9968	66.1271	79.9003	87.3073
ENSG00000067704	IARS2	541.815	609.136	496.429	582.468	553.378	503.524	547.979	522.22	556.727	522.369	559.979	550.556	482.589	517.667	551.304	478.133	500.946	494.791	471.552	524.236	483.185	526.27	320.084	451.967	562.752	500.243	527.178	690.713	701.088	684.948
ENSG00000067715	SYT1	275.04	320.13	249.795	270.753	253.688	243.705	254.488	142.235	335.301	260.646	275.26	251.631	290.168	253.629	280.596	167.593	213.197	189.104	100.979	96.2883	113.76	214.565	67.9424	102.621	343.217	296.689	347.548	133.525	141.829	129.522
ENSG00000067798	NAV3	8.26624	17.785	15.8098	6.99361	9.47102	17.1198	18.526	14.5349	14.7617	15.0787	18.9182	16.9539	18.4723	13.2492	9.88886	10.8443	11.7716	10.0978	14.2894	17.507	16.4189	30.9571	12.0786	13.1005	3.09204	1.92032	1.46439	0	1.6117	0
ENSG00000067829	IDH3G	57.0371	48.9088	61.8842	56.948	73.7149	45.2805	50.7027	69.56	65.2065	55.9463	54.8029	69.567	74.5453	74.5151	53.1526	68.4623	78.3654	71.5171	67.4183	73.4968	74.9583	66.9806	80.021	78.4069	66.8215	69.1314	69.6328	95.1464	101.511	77.0128
ENSG00000067836	ROGDI	87.9228	93.3713	79.5009	65.9397	60.8851	74.5215	55.578	75.7893	65.3194	61.3817	46.3495	62.8354	56.9562	55.8308	59.2276	45.8959	61.4739	70.6844	46.6788	71.955	70.1501	58.7117	69.4522	56.7688	47.4114	49.9277	44.4197	34.1339	41.9036	40.8401
ENSG00000067840	PDZD4	529.791	606.914	624.26	836.237	886.894	802.614	877.546	952.038	875.161	876.716	858.885	898.556	954.402	897.159	915.957	873.457	935.186	879.424	651.599	665.263	601.635	456.885	625.068	541.487	101.007	86.4142	102.507	15.0591	18.5345	21.0035
ENSG00000067900	ROCK1	970.334	810.535	798.474	702.424	709.416	809.402	343.862	236.649	697.564	730.833	826.263	642.484	764.349	593.533	737.162	562.727	812.348	455.116	428.393	365.701	303.287	663.972	147.735	188.866	827.227	751.854	842.429	911.825	940.822	845.18
ENSG00000067955	CBFB	173.591	217.866	152.226	217.801	203.627	203.423	278.865	189.992	304.723	215.41	260.125	209.693	256.303	234.701	242.277	358.847	423.777	340.571	285.789	286.92	277.949	361.877	237.043	279.477	376.199	364.86	394.408	396.558	381.166	359.393
ENSG00000067992	PDK3	435.856	524.658	494.621	486.556	487.758	406.848	519.703	395.558	607.339	515.908	554.304	539.848	498.752	488.329	525.345	422.926	444.705	409.419	346.757	299.564	428.065	408.847	246.102	290.394	367.954	413.828	355.846	283.112	334.427	315.053
ENSG00000068001	HYAL2	157.81	166.734	198.753	199.817	217.833	191.339	240.838	277.202	210.881	254.184	242.153	262.339	253.224	258.36	290.485	296.738	275.978	283.656	259.115	272.331	263.875	254.062	336.692	270.743	207.167	217.956	226.491	175.69	199.045	219.37
ENSG00000068024	HDAC4	88.5911	95.5944	99.8218	100.908	87.8855	100.705	135.532	124.585	104.386	135.708	93.5786	107.077	94.6705	93.6911	96.4164	111.27	112.376	95.4699	113.363	123.495	153.634	104.614	161.552	160.401	99.9761	110.418	92.7181	90.3549	89.4491	84.014
ENSG00000068028	RASSF1	89.4257	95.5944	92.6006	48.9553	52.7671	67.4722	37.052	46.7194	42.1763	38.7738	43.5119	33.9078	23.86	46.3724	21.0138	30.5611	44.4704	25.7034	34.2947	36.9591	30.0706	28.8221	36.2359	44.76	34.0125	28.8048	27.3352	77.3036	56.2701	65.3442
ENSG00000068078	FGFR3	53.3548	64.4706	63.6911	74.9315	69.0031	72.5074	43.8773	58.1397	52.7203	67.8541	57.7005	57.1079	241.679	241.326	262.055	671.358	725.915	615.047	487.747	497.976	518.37	372.553	427.282	427.95	274.162	259.243	287.02	168.662	176.481	152.859
ENSG00000068097	HEATR6	133.763	142.28	159.453	139.872	163.713	140.987	169.659	158.846	158.161	162.635	174.048	157.047	179.335	180.758	186.652	155.763	202.733	169.826	191.478	160.48	214.619	159.055	200.807	174.673	122.651	122.9	138.629	108.426	109.595	109.685
ENSG00000068120	COASY	108.964	88.925	93.5039	96.9115	108.24	91.6413	89.7048	109.012	84.3525	91.5492	82.3084	91.908	94.6705	99.3694	81.5831	69.0089	83.7091	92.716	81.9261	93.3704	83.2674	84.3314	125.316	118.996	93.7921	102.737	93.2326	124.489	130.547	135.356
ENSG00000068137	PLEKHH3	58.6152	51.1319	60.9808	53.9507	66.9737	62.4369	36.0769	43.6048	35.8498	30.1574	28.3773	33.0155	65.4227	84.2274	75.4025	101.542	108.56	115.665	85.7366	71.0004	82.0946	71.5215	93.6095	75.3279	71.117	59.5298	70.7787	32.1262	39.4866	52.5087
ENSG00000068305	MEF2A	203.105	190.43	174.069	167.993	186.836	172.105	165.291	133.264	158.595	186.052	164.845	150.275	169.733	162.681	173.69	178.792	189.964	163.183	199.166	184.484	209.061	241.293	113.237	138.227	233.067	287.739	256.894	213.727	213.366	230.263
ENSG00000068308	OTUD5	138.272	164.511	147.709	145.867	162.36	153.071	182.335	184.801	160.27	166.943	180.669	189.17	187.032	179.811	161.93	179.423	180.498	180.842	168.615	162.426	158.325	194.282	229.494	217.25	182.431	190.111	177.679	197.777	212.744	200.7
ENSG00000068323	TFE3	467.418	309.014	405.184	293.731	274.661	398.79	266.19	313.54	220.371	285.419	239.315	283.754	262.461	254.575	242.277	226.743	185.73	198.284	226.726	202.303	213.446	157.988	206.847	176.856	165.94	134.422	163.035	180.71	153.111	186.697
ENSG00000068354	TBC1D25	15.781	20.0081	20.7786	9.99087	19.6185	28.0499	17.5509	19.726	18.9793	22.618	23.6478	25.59	26.1691	24.6058	18.5416	16.7593	17.0034	18.3596	30.373	15.5927	24.6284	25.6197	40.7654	27.2927	32.9818	31.2438	34.169	45.1774	41.9041	45.5076
ENSG00000068366	ACSL4	536.554	700.284	518.112	655.402	681.913	514.602	491.427	208.68	777.098	713.006	773.755	639.787	710.412	582.02	739.193	601.363	694.525	566.394	444.877	451.291	409.301	500.651	143.434	143.014	421.548	377.342	420.766	340.336	284.465	337.223
ENSG00000068383	INPP5A	123.242	122.227	127.382	114.895	92.0042	93.6554	117.981	154.693	125.474	120.63	126.687	125.75	113.651	111.394	109.969	104.075	109.737	121.076	113.142	94.2109	104.158	106.577	134.224	101.571	131.74	114.186	133.885	103.406	94.2843	119.02
ENSG00000068394	GPKOW	41.3312	37.7931	45.171	51.9525	50.7376	49.3453	37.052	49.8341	39.013	45.2361	43.5119	39.2617	36.1749	45.426	45.736	41.4054	34.0068	44.063	44.7736	33.0687	39.8745	41.6319	63.4129	50.2186	31.9511	49.9282	52.7179	46.1814	70.1088	65.3442
ENSG00000068400	GRIPAP1	255.502	177.85	254.313	230.789	236.776	244.713	163.809	206.604	146.563	165.866	171.21	189.17	203.195	209.149	201.485	175.48	172.65	183.596	194.336	230.508	219.31	179.338	218.925	184.499	193.768	176.669	178.167	180.71	181.316	198.366
ENSG00000068438	FTSJ1	139.775	124.495	143.192	155.858	133.947	129.909	152.108	159.884	136.018	156.172	146.616	158.831	143.16	132.492	180.472	154.777	124.256	173.498	142.894	148.809	130.179	124.896	132.865	181.224	98.9454	120.02	111.781	123.485	110.401	92.182
ENSG00000068489	PRR11	356.952	397.939	341.04	376.656	332.162	337.361	454.375	459.926	412.273	508.368	457.821	464.002	442.565	460.885	464.776	363.775	429.009	434.205	509.657	458.098	521.887	491.044	452.949	504.369	575.12	585.697	588.193	663.607	598.746	607.935
ENSG00000068615	REEP1	10.5207	8.8925	9.93761	10.99	7.44152	7.04933	9.75052	15.5731	13.7073	16.1557	16.0805	13.3847	10.0058	7.571	21.0138	13.8018	18.3114	22.9495	30.4841	28.2057	28.1467	16.0123	27.1769	24.0176	22.675	16.3227	24.8946	6.02366	2.41755	4.66744
ENSG00000068650	ATP11A	671.819	595.797	628.781	390.643	435.668	494.46	427.073	413.207	428.089	383.429	365.121	401.54	429.48	480.758	375.777	316.455	363.611	305.687	297.22	276.221	308.441	238.049	265.73	195.416	222.627	264.044	265.541	602.367	592.298	591.599
ENSG00000068654	POLR1A	371.23	360.147	363.626	352.678	316.602	362.537	552.854	617.736	396.457	543.91	473.901	613.018	581.107	582.02	479.61	483.062	579.424	506.725	549.667	625.389	628.61	495.313	816.817	620.09	421.549	420.55	442.731	288.132	258.677	250.875
ENSG00000068697	LAPTM4A	711.648	638.037	707.829	875.2	817.212	787.511	916.549	1030.94	931.041	920.878	954.424	863.757	846.646	855.524	826.955	918.805	876.329	871.163	846.887	808.238	871.376	908.43	1028.19	970.529	885.355	916.953	891.324	1425.6	1433.6	1337.22
ENSG00000068724	TTC7A	95.4375	60.0244	95.5153	86.9206	87.0522	90.6343	77.0291	76.8275	61.1019	74.3165	66.2137	74.3714	69.1962	70.9781	69.222	74.924	61.4739	92.1705	68.9652	104.069	85.1635	93.5593	126.826	122.797	134.759	151.705	149.855	167.197	176.206	193.145
ENSG00000068745	IP6K2	258.508	291.229	309.873	313.713	334.868	290.03	306.166	322.883	288.907	319.884	321.61	328.37	282.472	300.001	297.902	314.483	332.22	309.359	361.999	423.085	390.536	290.356	375.948	364.63	325.695	317.813	315.819	430.691	410.983	399.067
ENSG00000068781	STON1-GTF2A1L	1.88716	4.14703	2.2338	1.71259	1.0107	2.84044	1.98007e-10	6.35669e-11	4.74655	1.27446e-11	2.4156	1.45149e-09	5.67675e-17	2.52684	5.68642e-16	1.02236e-15	0.004618	2.53279e-06	5.22783e-10	5.4271e-07	3.03742	2.4332	8.68112e-17	6.74838e-10	5.78342	4.21392e-05	7.47956	16.6913	17.8887	29.6542
ENSG00000068784	SRBD1	276.543	253.436	264.702	221.798	237.452	249.748	141.383	75.7893	196.12	197.1	240.261	210.585	216.279	186.436	210.138	221.814	221.044	204.709	238.157	227.59	198.2	211.362	58.8834	69.8693	208.198	201.633	207.455	232.915	226.444	207.701
ENSG00000068796	KIF2A	969.992	1024.41	870.381	969.935	997.084	973.614	684.825	440.955	931.282	959.315	995.515	896.151	934.832	811.972	900.224	730.579	900.635	722.382	703.495	632.583	607.055	788.607	318.67	387.688	826.999	889.055	867.262	561.668	581.594	639.31
ENSG00000068831	RASGRP2	69.1359	75.5863	73.177	56.948	44.6491	64.451	38.027	40.4902	34.7954	31.2345	43.5119	41.0463	31.5568	29.3376	37.0832	33.5186	35.3148	33.9653	25.721	9.72609	11.7278	8.53989	10.5688	5.45854	3.09204	0.960159	0.976257	1.00394	0	2.33372
ENSG00000068878	PSME4	700.265	907.035	774.147	838.719	830.681	805.446	1163.52	989.027	1136.13	1011.96	1098.63	1127.57	1014.72	1005.33	1038.1	901.532	1011.89	1058.27	951.557	986.869	960.241	1075.13	633.703	904.335	981.112	990.455	985.076	837.791	801.42	851.216
ENSG00000068885	IFT80	270.942	289.006	227.518	258.916	238.54	280.952	118.913	73.9799	191.955	177.411	211.104	159.698	206.08	154.306	212.305	139.028	163.207	96.5151	123.335	114.387	98.8923	182.919	28.6868	75.3281	198.044	229.659	208.563	330.713	331.959	304.26
ENSG00000068903	SIRT2	18.0354	13.3388	23.4889	20.9808	21.6481	22.155	12.6757	24.917	13.7073	15.0787	18.9182	16.9539	20.0116	14.1956	12.3611	18.731	19.6193	16.5236	14.2894	29.1783	24.6284	23.4847	28.6868	27.2927	34.0125	44.1673	31.2402	43.1695	66.0796	81.6803
ENSG00000068912	ERLEC1	104.455	135.611	125.124	139.872	129.888	116.817	137.482	101.745	176.086	133.554	139.049	158.831	154.705	169.401	159.458	151.82	154.338	146.877	181	152.7	132.524	169.73	78.5112	115.721	199.952	216.036	199.645	273.072	266.736	249.708
ENSG00000068971	PPP2R5B	19.5384	20.0081	15.3581	15.9854	12.8535	19.1339	19.501	11.4203	11.5985	15.0787	14.1887	11.6	8.46646	8.51737	16.0694	9.85842	7.84773	7.34384	7.62103	6.80826	10.555	9.60737	12.0786	8.73367	19.5829	23.0438	11.227	27.1065	20.9521	24.5041
ENSG00000068976	PYGM	38.3253	44.4625	32.5231	24.9772	28.4131	28.1973	16.5759	24.917	9.48966	11.8476	14.1887	16.9539	14.6239	21.7666	17.3055	21.6885	17.0034	13.7697	10.4789	15.5617	15.2461	13.8773	7.54915	14.1922	0	4.80079	4.39316	0	0.805848	2.33372
ENSG00000069020	MAST4	30.0591	33.3469	30.7163	42.9608	48.0316	41.2889	28.2765	28.0317	24.2513	29.0803	19.8641	22.3078	26.1691	31.2304	18.5416	23.6602	19.6193	26.6214	30.4841	25.2878	26.9739	28.8221	18.118	25.1093	45.35	41.2868	43.9316	40.1577	48.3509	47.8413
ENSG00000069188	SDK2	66.1299	55.5781	49.2363	58.9462	64.2677	54.3805	31.2017	35.2991	20.0337	28.0033	27.4314	33.0155	22.3207	29.3376	19.7777	23.6602	27.467	21.1135	92.405	109.905	105.55	113.153	179.67	156.114	136.05	156.506	166.452	71.2799	70.1088	88.6814
ENSG00000069248	NUP133	527.536	640.26	495.977	554.493	535.113	527.693	598.682	611.505	625.264	622.535	594.978	590.71	571.102	568.772	548.832	564.887	525.798	559.968	608.73	583.565	599.292	591.387	377.458	498.911	603.979	554.012	580.873	641.519	589.074	584.598
ENSG00000069275	NUCKS1	5609.75	5864.6	5091.22	4909.5	5141.39	5170.17	5802.51	4286.75	6125.05	5628.66	6073.68	5542.14	5655.6	5550.47	5367.18	5005.08	5571.89	5344.48	5289	4979.74	5374.85	4828.21	2115.27	3193.21	5645.04	5575.62	5790.18	4968.51	4976.89	4611.4
ENSG00000069329	VPS35	436.607	466.856	452.16	498.546	487.075	479.354	603.55	510.799	606.284	608.531	622.407	635.323	595.731	620.82	569.846	615.163	673.598	623.311	625.867	598.154	682.556	622.343	489.185	643.017	866.801	805.574	816.151	1159.55	1119.3	1187.87
ENSG00000069345	DNAJA2	758.989	840.342	702.414	688.372	675.828	706.949	912.647	946.845	920.495	784.093	810.643	830.738	711.955	713.564	804.704	782.761	718.069	787.628	791.635	751.83	782.245	705.609	724.719	776.205	683.339	657.71	675.085	636.501	638.231	592.765
ENSG00000069424	KCNAB2	28.5561	31.1238	29.3611	39.9635	27.0601	21.1501	31.2017	30.1081	20.0337	15.0787	18.9182	17.8462	21.551	17.9811	28.4305	16.7593	20.9273	15.6057	8.57366	15.5621	15.2461	17.0798	25.6671	16.3756	13.3989	11.5219	10.7538	6.02366	5.64116	15.1692
ENSG00000069482	GAL	84.1654	75.5863	81.7595	122.888	142.742	102.719	93.605	83.0568	94.8966	79.7017	85.132	66.9233	82.3556	75.71	90.2358	67.0372	91.5568	90.88	80.0208	82.6717	92.6496	65.1166	83.0407	85.1532	80.3932	79.6932	114.222	13.0513	8.86433	25.6709
ENSG00000069493	CLEC2D	63.9942	171.185	58.7968	64.1084	58.3377	57.35	87.7231	45.42	79.3556	94.7475	88.3208	67.467	81.3479	60.0598	66.9639	77.3052	102.297	84.2085	61.3114	65.4805	56.9844	78.3495	27.0147	36.0834	66.7597	66.9466	76.0092	72.9627	84.8265	83.2963
ENSG00000069509	FUNDC1	72.1418	71.14	70.9185	87.9197	73.7386	82.5778	70.2037	91.3624	87.5157	94.7805	89.8615	87.4464	92.3615	84.2273	88.9997	106.471	83.7091	94.552	75.2577	74.8908	75.058	74.724	58.8834	68.7777	93.792	82.5737	78.1006	136.536	134.577	131.855
ENSG00000069535	MAOB	11.2722	4.44625	11.7445	19.9817	12.8535	15.1057	4.87526	12.4585	6.32644	3.23115	8.5132	6.24617	4.61807	4.73187	8.65275	5.91505	6.53977	4.5899	4.76315	6.80826	4.69112	4.26994	7.54915	5.45854	2.06136	1.92032	2.92877	1.00394	0.805849	0
ENSG00000069667	RORA	85.1002	102.264	81.7584	48.1493	47.6684	47.3312	39.9771	31.4585	87.5157	71.0853	61.4842	66.9233	72.3498	71.9245	86.5275	29.5753	45.7784	35.8012	35.2473	35.0139	18.7645	52.4259	31.7064	25.1093	74.2091	74.8924	78.5887	146.576	138.606	124.854
ENSG00000069702	TGFBR3	22.5443	31.1238	28.006	33.969	30.4426	24.1691	44.8524	43.6048	63.2644	45.2361	47.2955	50.8617	54.6472	45.426	60.5692	35.4903	43.1625	44.063	33.342	35.9865	35.1834	29.8896	3.01966	13.1005	113.375	97.9361	93.7206	37.1459	36.2632	42.007
ENSG00000069849	ATP1B3	666.997	593.805	682.227	696.3	753.232	699.227	865.213	897.387	832.073	754.174	729.149	760.731	734.986	772.377	730.273	776.23	735.283	792.794	797.858	751.325	813.715	726.62	747.074	742.645	844.021	749.569	791.015	1179.43	1147.52	1142.96
ENSG00000069869	NEDD4	197.638	224.536	169.391	142.87	171.155	187.311	80.9293	31.1463	101.223	92.6263	107.834	105.293	88.513	88.9592	101.361	69.9947	117.716	77.1103	123.842	78.7813	63.3301	130.233	21.1376	31.6595	202.014	198.753	199.156	162.639	191.792	172.695
ENSG00000069943	PIGB	42.3809	40.1632	36.0358	32.0269	32.1638	33.4559	30.756	27.2495	24.6182	25.5191	21.3999	26.7081	32.811	38.9787	26.7561	30.3815	21.2322	25.7034	20.9312	36.6792	36.1811	18.4427	19.1687	35.3962	32.7834	43.7467	28.153	50.0377	39.7056	45.1756
ENSG00000069956	MAPK6	1417.24	1647.26	1293.65	1260.85	1269.76	1205.37	952.527	527.412	1445.49	1587.39	1660.96	1394.62	1538.59	1300.27	1631.65	1400.87	1485.71	1417.33	1183.02	1282.76	1078.96	1491.14	371.358	444.295	1503.62	1351.9	1456.05	1211.74	1122.5	1153.93
ENSG00000069966	GNB5	136.769	164.881	145.902	149.863	165.743	144.008	167.709	179.826	162.379	169.097	136.211	133.847	141.427	130.6	155.75	128.159	124.256	148.713	86.6893	88.5074	94.9952	114.221	101.159	121.18	84.5159	72.972	93.7206	76.2997	70.9147	73.5122
ENSG00000069974	RAB27A	43.685	42.2394	36.5885	45.958	48.7081	38.2678	30.2266	20.7642	35.8498	23.6951	28.596	39.2617	23.86	32.1768	25.9583	29.5753	24.8511	30.2933	35.2473	32.0961	31.6651	49.2756	12.0788	32.7513	50.5034	56.6493	63.4568	45.1774	54.7977	44.3407
ENSG00000069998	HDHD5	163.07	144.503	188.815	184.831	179.949	184.29	188.185	206.604	192.956	173.405	171.21	173.108	183.183	191.168	192.833	180.409	183.114	202.874	228.631	232.453	207.582	166.528	243.083	211.792	123.682	125.781	121.544	102.402	75.7498	92.182
ENSG00000070010	UFD1	122.36	117.826	125.554	145.327	130.445	157.099	191.977	186.754	154.906	163.712	180.669	186.493	186.218	159.937	148.282	174.431	147.799	184.514	209.518	198.412	208.755	203.89	249.122	258.683	236.928	200.621	235.239	204.804	186.107	163.361
ENSG00000070018	LRP6	652.281	758.088	625.164	600.45	578.409	589.122	725.441	453.698	795.024	697.931	704.708	634.434	609.581	639.752	660.08	608.267	694.522	586.592	692.565	609.825	601.638	564.703	246.102	311.137	535.956	555.933	583.308	580.28	555.228	565.929
ENSG00000070019	GUCY2C	3.00591	6.66938	7.48978	9.57178	5.66752	5.73319	6.82536	5.19105	4.21763	8.6164	11.3509	7.13848	9.23614	3.7855	9.88886	2.95753	2.61591	3.28965	8.57366	9.72609	8.20946	6.23587	1.50983	4.36683	6.18409	4.80079	11.227	0	0.805849	1.16686
ENSG00000070031	SCT	0	0	0.45171	0	0	0	0	2.07642	1.05441	1.07705	1.89182	2.67693	2.30904	0.946375	0	2.95753	5.23182	11.0158	7.62103	8.75348	4.69112	5.33743	25.6671	10.9171	24.7364	20.1633	18.0608	4.01577	8.05849	5.83431
ENSG00000070047	PHRF1	176.597	208.974	196.042	192.824	195.509	173.212	284.715	327.037	242.513	241.259	226.072	265.908	243.988	258.361	273.18	263.22	300.829	296.508	279.12	316.097	284.985	244.454	354.811	356.99	265.916	280.366	276.769	243.958	240.949	278.88
ENSG00000070061	ELP1	371.981	333.469	366.788	368.663	361.252	364.551	391.971	409.055	393.294	431.897	431.335	438.125	445.644	388.96	452.415	425.884	412.006	418.599	418.204	414.331	458.557	397.105	381.987	461.792	375.168	367.741	343.643	327.285	317.504	310.385
ENSG00000070081	NUCB2	82.6624	68.9169	86.7282	80.9261	87.9452	66.4651	62.4033	25.9552	71.6996	81.8558	122.968	68.7079	83.1253	61.5144	82.8192	77.8815	86.325	100.06	52.3946	76.8361	46.9112	90.7363	19.6278	21.8342	114.406	114.259	92.2563	121.477	142.635	151.692
ENSG00000070087	PFN2	1321.85	1187.15	1204.71	1160.93	1133.15	1230.62	1195.41	1233.4	1154.58	1130.91	1095.36	1086.84	1072.93	1116.73	1069.23	1078.51	1028.05	1098.82	973.591	915.228	964.028	945.791	966.294	975.986	834.851	886.222	746.349	1898.46	1784.15	1833.15
ENSG00000070159	PTPN3	25.5502	26.6775	30.7163	36.9662	44.6491	40.2819	35.1019	21.8024	25.3058	19.3869	20.81	17.8462	33.8659	20.8202	23.486	14.7876	13.0795	34.8832	20.0052	27.233	29.3195	21.3497	39.2556	33.843	17.5216	19.2032	28.3115	37.1459	28.2047	28.0047
ENSG00000070182	SPTB	12.4218	15.6788	19.4992	7.20763	11.8404	14.1953	9.13221	17.7205	7.38133	2.15445	3.34063	9.7623	4.34375	3.78552	6.04047	4.52246	1.49511	2.14685	6.39356	7.05738	3.08154	2.88589	3.09061	4.10653	7.24309	9.66894	14.2191	13.2642	9.86512	3.58207
ENSG00000070193	FGF10	0	0	0.903419	0	0	3.02114	0.975052	0	0	2.1541	2.83773	1.78462	1.53936	9.46375	0	0	2.61591	0	2.85789	2.91783	3.51834	4.26994	1.50983	1.09171	12.3682	9.60159	10.2507	25.0986	33.8456	25.6709
ENSG00000070214	SLC44A1	683.091	862.574	676.204	758.305	756.334	639.476	1178.84	1007.06	1233.65	1159.99	1116.17	1111.82	1118.34	1175.41	1112.5	1148.5	1222.93	1185.11	1364.16	1251.75	1328.76	1776.3	1161.06	1495.64	2385.05	2573.25	2485.59	1471.8	1497.28	1434.07
ENSG00000070269	TMEM260	172.088	191.189	151.323	161.852	174.537	181.269	150.158	120.432	176.086	158.326	175.939	122.247	173.947	137.224	187.888	135.06	176.574	142.287	154.326	142.001	120.796	134.503	83.0406	124.455	151.51	151.705	148.391	241.95	207.909	225.204
ENSG00000070366	SMG6	204.729	132.914	193.492	166.848	181.822	178.118	194.885	206.79	153.481	178.79	166.359	211.866	186.298	200.723	153.277	146.334	141.772	179.966	194.678	214.946	202.764	160.788	248.312	243.464	214.109	223.503	222.44	253.869	207.358	183.06
ENSG00000070367	EXOC5	954.992	1117.81	782.423	877.956	935.796	841.4	471.213	242.533	875.257	902.892	1100.85	738.68	919.815	697.227	908.202	746.003	925.191	601.466	548.538	434.315	334.926	786.693	203.354	240.789	967.435	922.096	1027.13	1116.54	1037.03	1003.76
ENSG00000070371	CLTCL1	39.8283	22.2312	41.945	39.8524	39.9136	32.2255	29.2516	39.5246	36.901	33.3886	39.7282	31.1115	26.1691	34.0695	19.1169	39.8432	40.5466	33.0473	43.8209	39.6446	39.8745	40.5645	22.6475	26.201	27.8284	24.9641	27.3352	15.0591	15.9065	14.0023
ENSG00000070404	FSTL3	14.2781	15.5619	24.3923	13.9872	18.2655	25.1762	28.2765	11.4203	22.1425	15.0787	18.9182	16.0616	16.1633	18.9275	17.3055	24.646	14.3875	28.4574	25.721	18.4796	18.7645	18.1473	18.118	19.6507	15.4602	19.2032	14.6439	14.0552	11.2819	15.1692
ENSG00000070413	DGCR2	243.479	266.775	313.487	305.721	302.397	249.748	386.121	414.245	358.499	346.81	323.501	357.817	367.136	370.979	389.374	311.526	336.145	313.949	379.147	390.017	371.771	349.067	593.365	492.36	480.297	417.669	460.795	408.604	386.001	374.562
ENSG00000070423	RNF126	122.491	144.503	177.522	137.874	150.172	140.987	128.707	147.426	121.257	105.551	123.914	127.6	119.3	115.458	117.43	120.273	119.024	133.107	96.2155	121.576	107.896	124.896	158.532	153.931	137.081	117.139	125.449	109.43	121.399	102.684
ENSG00000070444	MNT	46.0556	39.6518	54.1648	40.9033	43.7841	65.2819	64.351	64.3689	52.7099	60.2945	51.7131	74.1554	82.1073	91.7984	74.1664	57.1516	44.9207	63.1276	44.6154	61.0258	63.3085	43.7669	73.7275	54.2752	30.7829	38.1856	48.3247	55.2169	60.559	66.2599
ENSG00000070476	ZXDC	146.538	126.718	132.803	118.891	125.829	116.817	107.256	103.821	92.7878	108.782	98.3747	116.893	130.076	122.082	131.027	100.556	126.872	134.943	136.226	143.946	131.351	106.749	146.454	152.839	98.9454	119.06	94.2088	103.406	95.0901	89.8483
ENSG00000070495	JMJD6	22.5443	15.5619	32.5231	40.9626	27.0601	30.2114	55.5779	56.0633	65.3732	54.9295	44.4578	49.9694	43.8717	54.8897	59.3332	54.2213	53.6261	60.5867	67.6367	75.8635	80.9218	68.3191	86.0603	76.4196	76.2704	49.9282	61.5042	59.2327	66.8854	63.0105
ENSG00000070501	POLB	111.219	133.387	131.448	100.908	120.417	173.212	117.981	112.127	114.93	90.4722	105.942	108.862	93.9008	100.316	112.486	111.4	98.0966	111.994	110.505	113.795	100.859	121.693	117.767	149.564	91.7307	75.8525	90.7919	74.2918	78.1673	66.5111
ENSG00000070540	WIPI1	73.9295	63.5678	85.1941	73.7506	88.9514	75.3823	47.1474	37.9068	35.1405	32.1137	42.5027	35.3337	30.4686	28.7421	22.1676	41.0767	37.5712	35.7982	56.6508	55.9859	55.1375	50.885	79.4019	48.8217	53.5058	50.3485	46.9004	145.814	138.221	145.182
ENSG00000070610	GBA2	268.277	271.221	347.153	314.712	331.486	309.674	286.579	348.838	264.481	289.727	297.962	273.047	290.169	327.347	309.027	280.87	302.138	311.819	329.61	330.311	347.143	319.178	401.32	350.162	323.414	294.769	314.555	292.148	302.194	298.716
ENSG00000070614	NDST1	364.466	411.278	403.377	466.574	441.756	427.995	640.609	710.135	555.672	658.077	562.817	625.51	637.294	665.301	590.859	613.194	618.662	639.832	621.114	654.565	632.128	751.51	987.429	906.118	1031.71	1084.02	1071.93	1105.34	1065.33	1172.7
ENSG00000070669	ASNS	1702.27	1463.25	1420.13	1348.58	1398.24	1747.35	693.185	667.679	585.95	560.223	676.092	637.819	674.249	589.564	598.382	959.95	915.736	945.944	1221.3	1241.77	1292.43	1812.53	2141.75	2213.03	2840.01	2917.92	2893.61	345.099	379.465	330.393
ENSG00000070718	AP3M2	142.029	144.503	148.612	164.85	149.507	138.973	109.206	107.974	106.495	110.936	115.401	124.923	119.3	114.511	98.8886	126.188	133.411	118.419	92.405	114.768	110.241	118.491	110.218	126.638	88.6387	131.542	98.1138	64.2523	77.3615	64.1774
ENSG00000070756	PABPC1	6528.36	7316.78	6350.13	5715.67	5908.14	6530.08	8383.35	8668.09	8218.61	7797.54	6500.59	7473.08	7775.22	7825.98	6945.09	6716.91	7773.05	7598.18	7522.07	7145.85	7717.06	7361.27	8166.85	8104.85	6045.4	6372	6439.26	8299.32	8414.36	7861.64
ENSG00000070759	TESK2	33.065	24.4449	38.3953	27.9721	34.5016	36.2537	33.7586	25.955	29.5202	26.9262	21.7559	17.8435	32.3265	31.1531	18.5415	15.9876	23.7483	21.1135	26.6736	19.4521	22.2828	30.9571	49.8238	34.9347	60.8102	62.6743	61.4877	63.2412	62.6079	63.0105
ENSG00000070761	CFAP20	195.384	188.966	167.133	167.847	164.39	167.17	175.509	150.54	138.127	133.554	147.562	150.8	153.936	125.868	147.097	156.749	126.872	178.088	134.321	143.946	159.498	151.583	182.689	218.341	175.216	155.546	163.035	137.54	140.218	156.359
ENSG00000070770	CSNK2A2	638.554	619.824	606.381	633.75	624.323	593.127	692.572	758.025	694.043	679.894	571.29	637.1	626.485	711.385	683.132	623.203	692.722	623.416	601.165	568.334	586.963	588.236	731.831	649.214	620.183	649.794	663.24	658.852	704.046	667.289
ENSG00000070778	PTPN21	90.1772	106.71	86.2766	76.9297	89.9747	91.6413	93.605	97.5917	86.4614	73.2394	74.727	81.2003	95.4402	101.262	114.852	132.103	128.18	131.271	109.552	95.3157	120.796	84.3314	81.5309	101.424	78.3318	94.0956	92.2564	173.634	142.635	154.384
ENSG00000070785	EIF2B3	128.502	113.379	125.124	136.875	131.918	103.726	137.482	136.006	95.951	92.6263	102.158	125.816	89.2827	112.619	100.125	109.428	116.408	114.747	95.2629	101.151	113.76	116.356	137.395	128.822	78.3318	84.4939	82.4937	65.2563	69.303	47.8413
ENSG00000070814	TCOF1	776.2	815.887	782.3	794.274	722.502	770.298	1025.52	1108.81	921.552	903.55	926.933	980.645	908.888	928.336	836.845	859.494	941.727	992.287	1016.45	1039.64	1085.99	929.778	1295.44	1170.31	695.557	742.094	750.672	447.706	400.507	428.238
ENSG00000070831	CDC42	648.652	667.306	645.917	730.075	714.387	641.498	898.805	945.671	927.645	898.884	895.128	894.5	882.339	908.395	873.586	887.956	774.044	835.462	884.899	837.027	829.545	886.336	763.656	907.503	1137.08	1124.85	1147.4	1998.45	2011.8	1897.23
ENSG00000070882	OSBPL3	169.834	180.073	142.289	135.876	149.507	173.212	135.532	97.5917	138.127	127.092	128.644	139.201	129.306	122.082	134.736	119.287	125.564	121.173	124.794	100.179	87.9585	146.246	54.3539	87.3367	142.234	141.143	130.33	162.639	156.335	145.858
ENSG00000070886	EPHA8	17.284	17.785	19.4235	19.9817	23.0011	17.1198	11.7006	10.3821	24.2514	16.1557	11.3509	11.6	12.3149	8.51737	18.5416	8.87258	13.0795	15.6057	11.4315	14.5891	14.0734	5.33743	12.0786	9.82537	7.21477	7.68127	5.36941	0	0	0
ENSG00000070950	RAD18	201.396	211.197	205.528	202.815	196.185	203.424	217.437	111.088	217.208	241.259	283.773	260.555	247.837	230.916	254.638	221.814	295.597	247.855	227.678	222.727	195.854	180.405	55.8637	89.5201	161.817	179.55	185.489	129.509	132.965	138.857
ENSG00000070961	ATP2B1	457.571	522.435	431.835	484.557	470.845	418.932	283.74	179.61	466.048	472.825	530.657	439.909	477.2	836.596	509.276	389.408	508.795	370.864	295.315	240.235	191.163	394.97	108.708	120.088	851.343	673.073	798.578	6905.99	6756.31	6585.67
ENSG00000071051	NCK2	270.446	264.552	289.537	323.171	284.019	280.335	267.621	310.224	300.103	252.904	263.814	286.794	245.528	292.648	264.392	305.777	313.607	287.977	313.13	285.306	330.052	332.749	379.66	361.14	343.631	313.809	329.357	349.97	330.728	364.785
ENSG00000071054	MAP4K4	1088.13	998.184	1051.58	898.179	1005.28	994.962	1357.28	1315.41	1156.68	1372.16	1312.92	1423.24	1353.86	1327.76	1333.76	1216.53	1258.25	1244.78	1320.34	1312.05	1352.21	1093.1	1177.67	1209.61	1220.32	1110.9	1178.83	1123.41	1140.28	1123.69
ENSG00000071073	MGAT4A	42.0827	53.355	40.6539	54.9498	48.7081	46.3242	32.1767	14.5349	49.5571	32.3115	42.566	39.2617	40.0233	39.7477	48.2082	28.5894	45.7784	38.5552	24.7684	23.3426	21.11	36.2945	7.54915	9.82537	47.4113	37.4462	47.8366	77.3036	71.7205	74.6791
ENSG00000071082	RPL31	1722.07	1552.15	1822.05	1885.97	1820.55	1737.66	1899.69	1878.53	1754.94	1924.12	2084.74	2000.98	1945.86	1775.69	1800.2	2125.35	1636.87	2063.45	1949.97	2110.73	1963.23	2025.52	1823.04	1804.47	1932.02	2017.94	1938.85	1941.71	1957.39	1914.57
ENSG00000071127	WDR1	1031.03	1138.24	1151.41	1051.04	1050.61	954.679	1366.04	1559.39	1215.73	1363.55	1357.38	1405.38	1374.64	1417.67	1461.08	1470.87	1425.68	1528.44	1530.87	1544.51	1589.12	1269.24	1687.99	1629.92	1317.21	1342.3	1395.07	1782	1698.72	1768.96
ENSG00000071189	SNX13	290.821	326.799	280.511	262.76	302.396	267.875	128.707	66.4454	243.568	231.566	253.504	227.539	233.982	204.417	252.166	240.545	273.362	212.971	207.673	179.933	167.708	219.902	46.8047	61.1357	273.131	236.199	264.078	339.333	331.203	353.559
ENSG00000071205	ARHGAP10	42.0827	42.2394	48.7846	42.9608	37.2076	39.2748	21.4511	24.917	17.9249	20.4639	27.4314	24.0924	30.0175	37.855	25.9582	30.5611	32.6989	32.1293	46.6788	40.8496	43.3929	40.5645	49.8244	54.5854	60.8102	53.7689	49.7891	160.631	179.704	192.532
ENSG00000071242	RPS6KA2	172.84	182.296	191.525	147.865	167.772	193.353	137.482	152.617	103.332	122.784	110.672	115.108	115.452	104.101	114.958	129.145	167.418	128.517	113.363	152.699	157.153	131.301	167.591	127.73	43.2886	40.3267	50.2773	27.1065	25.7872	45.5076
ENSG00000071243	ING3	95.4376	117.826	93.5039	107.901	88.6217	77.5426	79.9543	44.643	87.5157	133.554	106.888	120.462	132.385	111.672	132.263	137.032	159.57	155.139	117.173	127.412	85.6129	97.1412	30.1966	50.2186	161.817	114.259	121.056	100.394	87.8375	102.684
ENSG00000071246	VASH1	65.1279	92.0003	78.2212	80.8346	79.3158	71.3244	51.7173	78.0765	50.3044	56.1804	56.3508	60.8599	56.3129	59.9895	45.9392	54.8849	47.1175	40.9323	48.1686	30.5677	33.909	32.6764	66.9647	49.4752	52.4839	39.7549	59.2429	61.981	61.7157	54.1232
ENSG00000071282	LMCD1	41.3312	37.7931	65.4979	44.9589	37.8841	55.3876	29.2516	43.6048	29.5234	40.9279	36.8905	40.154	36.1749	42.5869	49.4443	15.7735	18.3114	16.5236	22.8631	30.452	26.9739	25.6197	19.6278	16.3756	31.9511	26.8844	34.6571	22.0867	32.2339	35.0058
ENSG00000071462	BUD23	130.008	142.28	138.407	138.567	143.426	133.748	171.609	158.128	133.247	159.694	137.157	134.739	142.1	132.492	145.869	159.526	127.531	167.631	153.373	183.823	149.371	145.954	224.058	184.634	100.006	104.657	120.532	77.3036	76.5556	67.6779
ENSG00000071537	SEL1L	224.692	242.321	238.051	261.761	260.453	216.515	307.141	176.496	358.498	366.197	365.122	331.94	306.332	338.802	315.207	240.545	298.214	249.691	311.51	290.81	279.122	309.571	123.806	207.425	425.672	414.788	443.709	497.956	540.724	491.248
ENSG00000071539	TRIP13	139.775	160.065	139.126	170.844	165.066	126.888	273.015	267.858	256.221	263.877	244.991	242.708	252.454	238.486	233.624	270.121	256.359	279.984	251.494	249.96	259.184	265.804	264.22	283.844	176.247	165.147	176.214	83.3273	112.819	110.852
ENSG00000071553	ATP6AP1	117.23	102.264	117.896	118.891	135.3	156.092	137.482	146.388	137.073	146.479	133.373	159.724	153.936	156.152	149.569	149.848	138.643	132.189	169.568	162.425	158.325	138.773	215.906	183.407	218.505	188.191	216.729	398.566	375.525	386.231
ENSG00000071564	TCF3	700.377	651.376	732.22	728.332	717.09	709.968	835.621	831.604	774.989	730.24	700.92	717.417	758.903	792.116	776.276	720.65	795.236	792.215	702.088	686.662	700.149	725.891	919.485	918.127	741.06	719.159	774.66	598.35	580.211	589.265
ENSG00000071575	TRIB2	420.827	515.765	426.866	526.519	483.699	472.305	449.499	468.232	461.83	420.049	419.984	414.924	362.519	335.017	380.721	272.092	283.826	268.05	245.778	235.371	239.247	199.62	270.26	234.717	267.977	196.832	236.254	382.503	342.486	375.729
ENSG00000071626	DAZAP1	708.639	818.11	726.804	774.29	761.065	756.294	872.675	911.55	770.773	763.631	750.109	801.295	735.044	732.496	840.551	837.968	771.693	801.396	779.251	778.088	825.637	772.861	931.565	881.008	672.003	726.839	691.679	523.054	532.666	527.421
ENSG00000071655	MBD3	225.546	268.998	243.896	249.498	258.716	220.243	375.392	405.492	353.226	358.428	353.887	341.585	379.224	384.786	432.638	425.694	474.787	471.198	487.745	455.18	443.295	357.607	535.984	476.97	460.4	426.059	461.291	342.639	319.01	345.391
ENSG00000071794	HLTF	929.539	993.917	841.971	855.569	899.142	863.518	353.786	136.506	580.725	502.643	523.446	421.188	458.954	421.323	455.416	373.848	384.741	304.235	326.437	234.151	218.677	329.008	59.5239	93.8869	272.1	310.053	283.608	189.358	255.629	257.904
ENSG00000071859	FAM50A	74.3962	62.2475	94.859	79.927	83.2097	68.4792	78.0042	91.3624	94.8966	93.7033	96.4829	91.908	93.1312	105.048	69.222	80.839	74.5534	94.5519	85.7366	95.3156	76.2307	77.9265	75.4915	97.162	77.3011	79.6932	82.9818	112.442	134.577	114.352
ENSG00000071889	FAM3A	27.0532	24.4544	37.9436	19.9817	29.7661	24.1691	34.1268	37.3755	28.469	37.6968	27.4314	24.0924	33.8659	40.6941	37.0832	46.3346	26.1591	34.8832	47.6315	37.9317	44.5656	37.362	49.8244	44.76	39.1659	48.0079	42.9553	66.2602	62.8562	60.6768
ENSG00000071894	CPSF1	334.407	293.453	330.651	334.694	355.617	326.283	371.494	372.717	262.547	364.043	286.611	337.293	353.283	339.749	351.054	369.691	350.532	358.012	344.852	384.181	367.08	292.491	466.537	375.548	286.53	279.406	294.83	382.502	356.991	357.059
ENSG00000071967	CYBRD1	52.6034	60.0244	47.8812	46.9571	51.4141	43.303	57.5281	55.0251	60.1012	38.7738	39.7282	41.0463	66.1923	49.2115	50.6804	49.2921	58.8579	45.899	27.6262	44.74	46.9112	46.9694	36.2359	32.7512	52.5648	59.5298	43.4434	11.0434	8.05849	10.5017
ENSG00000071994	PDCD2	447.082	537.996	436.803	451.588	462.04	480.361	542.114	564.786	547.153	543.91	559.019	527.356	537.174	526.185	541.378	539.23	516.642	571.879	488.699	540.77	545.336	641.559	724.621	736.902	802.901	831.488	798.513	598.35	633.362	550.738
ENSG00000072041	SLC6A15	274.289	304.568	254.313	286.738	302.396	281.973	256.439	156.77	296.288	255.261	260.125	230.216	243.988	218.613	262.055	225.758	257.667	201.956	115.268	112.823	121.969	83.2639	30.1966	51.3103	34.0125	40.3267	26.3589	28.1104	24.9813	52.5087
ENSG00000072042	RDH11	542.429	675.829	593.062	646.3	696.793	627.374	799.539	794.186	850.905	771.117	819.107	795.051	756.598	730.582	723.122	740.366	826.627	787.626	831.556	816.901	809.22	817.693	628.09	806.774	869.781	847.817	814.691	789.099	712.32	760.793
ENSG00000072062	PRKACA	100.698	88.925	108.862	122.888	112.299	94.6624	116.031	129.776	102.277	102.32	101.212	94.5849	107.755	105.994	112.486	95.6267	116.408	101.896	140.989	122.549	124.315	144.111	240.063	210.7	164.909	157.466	165.476	143.564	132.965	131.855
ENSG00000072071	ADGRL1	662.954	546.889	609.089	563.828	566.145	586.949	550.772	519.25	454.353	457.693	381.368	536.947	516.238	535.649	506.67	613.563	703.841	707.926	689.633	752.319	752.006	668.412	940.572	755.483	515.131	532.694	556.445	191.023	208.608	175.687
ENSG00000072110	ACTN1	752.702	782.54	818.102	826.392	807.689	804.404	1110.58	1268.54	1028.93	1084.59	955.371	1048.47	1086.87	1096.85	1064.29	1149.49	1141.84	1184.19	1166.02	1177.77	1194.38	1070.33	1404.14	1277.3	943.764	962.08	961.614	1664.55	1543.21	1708.29
ENSG00000072121	ZFYVE26	152.55	160.065	175.263	196.82	150.86	159.114	221.337	222.177	187.684	208.948	185.398	210.585	198.036	226.184	192.833	176.573	199.168	199.202	216.247	228.563	224.001	212.43	262.711	259.827	238.087	200.673	200.133	229.903	206.297	225.204
ENSG00000072133	RPS6KA6	205.154	215.643	166.229	195.821	191.45	187.311	129.682	58.1397	205.609	170.174	221.343	176.678	183.953	163.723	203.958	177.452	249.819	146.877	228.631	168.262	148.943	263.669	70.962	100.437	260.763	276.526	281.161	281.105	271.571	255.542
ENSG00000072134	EPN2	210.53	213.881	218.248	223.166	219.245	239.605	195.985	215.947	172.174	197.089	196.714	189.17	202.425	184.852	202.721	161.51	183.113	165.236	180.999	158.282	193.901	210.485	197.788	245.635	186.553	230.438	179.635	154.607	165.198	161.027
ENSG00000072135	PTPN18	42.0827	37.7931	44.7193	53.9507	46.0021	47.3312	39.9771	39.452	27.4146	25.8492	35.9446	39.2617	43.102	31.2304	48.2082	28.5894	35.3148	31.2113	27.6262	30.1509	36.3562	21.3497	51.3342	39.3015	36.0739	24.9641	23.4302	27.1065	34.6515	32.6721
ENSG00000072163	LIMS2	9.01772	8.8925	6.32394	3.99635	2.70601	5.03524	7.80042	7.26747	5.27203	8.6164	5.67546	3.56924	5.38775	8.51737	7.41664	11.8301	7.84773	19.2776	11.4315	7.78087	14.0734	5.33743	12.0786	9.82537	8.24545	8.64143	9.76257	3.01183	5.64094	5.8343
ENSG00000072195	SPEG	163.822	157.842	170.746	145.838	139.282	162.135	113.106	128.738	103.332	98.0116	108.78	128.493	98.5189	134.385	116.194	128.159	121.64	120.255	108.6	114.332	107.791	85.3988	119.277	124.455	66.9943	70.0916	64.433	38.1498	42.71	47.2315
ENSG00000072201	LNX1	52.6451	34.6906	37.1233	31.3471	37.6349	47.7201	39.613	31.0311	53.1389	56.2972	67.913	32.8102	58.6843	54.1534	85.6162	46.3958	46.1553	29.4067	58.4236	62.1505	65.2945	61.4419	24.5043	30.2007	74.0825	66.1184	76.0642	312	272.215	286.76
ENSG00000072210	ALDH3A2	489.212	426.84	435.448	551.496	564.878	530.714	483.626	537.793	544.074	501.906	519.305	499.693	493.365	452.367	504.332	531.368	548.033	520.495	436.304	428.92	505.468	463.289	498.244	471.617	625.624	644.266	641.889	135.532	161.205	148.191
ENSG00000072274	TFRC	371.23	437.956	445.837	1172.92	1376.03	1077.54	1659.54	1491.9	1670.19	1310.78	1368.73	1323.29	1212.24	1145.11	1280.6	523.482	544.109	524.165	774.487	810.18	878.409	1039.74	875.698	1040.4	491.634	423.429	513.997	412.62	378.748	448.075
ENSG00000072310	SREBF1	191.784	233.428	279.157	237.783	262.483	231.621	219.387	238.788	207.718	237.158	187.29	212.37	254.764	237.54	250.93	245.475	300.829	303.851	255.305	225.881	234.556	194.282	273.279	240.176	287.56	271.725	276.281	229.903	218.385	311.552
ENSG00000072315	TRPC5	35.3194	26.6775	32.5231	36.9662	31.7956	32.2255	16.5759	5.19105	17.9249	7.53935	14.1887	14.277	10.0058	20.8202	12.3611	7.88673	7.84773	4.5899	3.81052	0	7.03668	11.7423	6.03932	4.36683	18.5523	16.3227	23.4302	63.2484	62.8562	72.3454
ENSG00000072364	AFF4	1161.03	1273.85	1006.41	1003.08	973.488	1010.07	913.624	458.889	1070.22	953.188	925.102	941.389	895.136	1033.44	909.775	762.056	948.267	755.498	900.234	807.266	817.428	861.459	327.633	362.447	1329.58	1237.64	1317.46	1682.6	1735.8	1701.28
ENSG00000072401	UBE2D1	371.229	500.203	294.967	411.625	414.018	350.453	316.892	194.145	482.918	438.36	482.414	339.97	387.917	332.178	446.234	429.828	521.873	384.634	349.615	281.084	239.247	394.969	120.786	167.031	449.377	427.271	436.387	349.372	353.767	331.388
ENSG00000072415	MPP5	337.294	431.286	316.586	353.606	330.132	335.347	244.728	154.693	305.461	286.495	285.62	279.115	284.011	315.143	292.957	284.809	275.977	229.358	244.826	226.677	269.641	277.515	80.021	133.122	417.426	390.614	382.884	934.673	820.154	845.496
ENSG00000072422	RHOBTB1	87.9228	106.71	93.5038	83.9233	96.7398	96.6766	82.8794	85.1332	75.9173	82.9329	86.0779	97.2619	83.1254	83.281	67.9859	93.6549	99.4045	102.814	85.7366	86.5622	110.241	73.6565	72.4718	87.3367	59.7795	54.729	47.3484	101.398	86.2257	105.017
ENSG00000072501	SMC1A	961.886	920.374	1006.86	1017.07	1026.93	991.942	1068.65	1067.28	1056.51	970.421	1014.96	992.245	987.497	993.691	939.44	877.4	941.723	933.584	973.589	1074.73	1028.53	963.944	954.21	1037.13	1110.04	1228.05	1122.22	949.731	904.972	890.313
ENSG00000072506	HSD17B10	151.798	142.28	170.746	179.836	177.92	176.233	193.06	219.062	156.052	197.1	208.1	206.124	186.262	212.934	199.013	242.517	173.958	228.577	234.347	222.727	219.31	206.025	324.614	259.827	196.86	239.08	203.55	220.867	173.257	199.533
ENSG00000072518	MARK2	189.372	184.519	162.164	187.828	165.066	186.304	187.21	193.107	142.345	182.022	154.183	173.108	163.172	174.133	191.597	181.395	170.034	171.662	198.147	200.357	199.373	178.27	267.24	247.818	239.118	230.438	310.45	208.82	222.414	231.039
ENSG00000072571	HMMR	768.761	898.141	690.647	629.426	697.475	778.447	289.591	140.158	566.201	586.991	645.114	518.433	559.556	486.436	514.22	540.242	631.743	497.547	552.527	484.359	408.127	635.145	95.1193	140.83	562.736	665.392	590.637	561.202	585.852	543.757
ENSG00000072609	CHFR	199.141	180.073	184.297	213.805	137.33	186.304	182.335	189.992	178.195	187.407	170.264	152.588	173.178	187.382	211.374	215.899	224.968	212.053	214.342	189.659	197.027	182.54	231.004	252.185	214.382	203.554	213.8	318.25	290.911	266.209
ENSG00000072657	TRHDE	20.2245	28.4544	20.446	16.7635	18.2887	17.7553	29.2438	15.5731	34.8963	29.156	40.6485	27.4271	21.7327	18.9286	25.4394	24.1287	24.257	14.9151	15.1616	12.3873	16.4189	9.60725	4.52949	5.45854	5.15341	7.68127	3.4169	1.00394	2.41755	3.79367
ENSG00000072682	P4HA2	29.9861	24.4544	31.6197	29.9726	33.1486	32.2255	21.4511	28.0317	16.8705	21.541	15.1346	20.5231	16.1633	22.713	21.0138	19.7168	20.9273	16.4451	15.2421	23.3426	22.2828	23.4847	39.2556	29.4761	29.8898	38.4063	36.1215	54.2129	78.1673	72.3454
ENSG00000072736	NFATC3	267.723	211.773	276.651	261.681	263.59	245.397	326.627	304.14	294.476	297.707	279.396	267.508	232.973	276.06	265.278	240.011	250.6	224.989	238.099	239.542	253.568	241.65	261.277	242.787	295.077	277.19	294.767	227.469	217.224	262.994
ENSG00000072756	TRNT1	221.411	295.894	230.006	263.254	231.14	231.82	177.459	143.465	264.818	242.931	269.941	207.407	238.735	204.861	228.158	278.98	267.983	232.249	183.679	159.575	142.671	233.136	95.6949	96.0703	249.18	203.013	250.251	195.342	207.882	215.192
ENSG00000072778	ACADVL	220.183	166.734	247.537	249.772	248.276	268.882	221.337	251.247	176.086	242.336	251.612	215.939	207.044	230.915	217.555	231.673	244.587	242.347	252.447	269.413	273.258	267.939	324.614	246.726	224.689	208.354	219.658	374.471	375.525	442.24
ENSG00000072786	STK10	87.9228	77.8094	84.9214	81.9252	84.5627	85.599	72.1539	73.7129	76.9717	71.0853	60.5383	72.2771	66.1924	69.0854	61.8054	69.9948	58.8579	55.9968	49.5367	55.4387	69.1941	76.859	108.708	82.9698	78.3318	94.0955	73.2193	88.347	90.255	82.8471
ENSG00000072803	FBXW11	577.134	533.55	542.495	518.525	525.635	539.778	604.521	647.842	619.992	543.91	583.627	625.511	556.476	496.848	540.18	408.139	461.709	422.271	460.093	424.056	443.31	394.97	412.184	457.425	351.463	349.497	359.263	439.726	453.693	438.739
ENSG00000072818	ACAP1	73.6447	66.6938	74.9838	59.9452	53.4436	61.4299	59.4782	68.5218	48.5027	57.0837	69.9974	66.031	58.4956	51.1042	59.3331	52.2496	48.3943	64.2586	45.7262	61.2743	50.4295	57.6442	69.4522	56.7688	31.9511	27.8446	27.3352	20.0789	21.7579	22.1704
ENSG00000072832	CRMP1	507.246	437.956	544.763	453.585	501.288	524.672	573.33	623.965	452.341	496.52	507.008	506.832	504.14	454.261	486.077	534.328	453.86	488.365	434.398	509.647	470.284	327.718	474.086	445.417	272.215	312.051	267.57	209.824	188.568	210.035
ENSG00000072840	EVC	50.3489	71.14	52.3983	54.9498	56.1496	50.3524	43.8773	42.5666	45.3395	50.6213	38.7823	45.5078	50.7988	52.997	41.7404	32.5328	49.7023	44.063	43.8209	62.2469	57.4662	64.0492	89.08	75.3279	64.8179	61.4501	72.1678	62.2445	61.2445	63.0105
ENSG00000072849	DERL2	119.488	164.511	129.404	142.87	154.242	122.86	193.364	212.833	194.011	215.737	210.938	234.863	235.595	225.237	248.458	226.744	247.203	239.73	216.675	229.126	216.019	210.295	184.199	212.883	231.903	219.876	239.675	234.923	221.608	241.54
ENSG00000072864	NDE1	62.9867	68.7078	70.3537	66.8222	70.3065	81.3797	65.2235	75.6116	66.1933	50.6213	57.5969	65.1053	72.3498	70.9781	58.097	50.2486	47.0864	56.5944	61.9209	63.2124	63.3301	79.822	104.129	98.2284	84.9891	89.2947	80.3758	91.3481	71.6667	72.3454
ENSG00000072952	IRAG1	48.846	53.355	35.6851	41.9617	47.3551	61.4299	31.2017	23.8788	12.6529	11.8476	21.7559	20.5231	17.7026	12.3029	13.5972	14.7876	1.30795	8.26182	14.2894	17.507	28.1467	30.9571	39.2556	27.2927	36.0739	26.8844	27.3352	52.205	43.5158	56.0093
ENSG00000072954	TMEM38A	27.8046	13.3388	18.0684	24.9772	25.0306	13.0916	24.3763	23.8788	23.1969	14.0016	17.9723	24.9847	20.7813	13.2492	16.0694	15.7735	17.0034	18.3596	13.3368	16.5343	10.555	9.60737	22.6475	18.559	13.3989	8.64143	10.7388	3.01183	5.64094	9.33489
ENSG00000072958	AP1M1	60.1181	73.3631	70.4667	67.9379	77.1212	67.4722	82.8794	106.936	81.1893	74.3165	75.6729	90.1234	80.0466	87.0665	67.9859	79.8532	66.7057	88.1261	85.7366	104.069	87.9585	90.7363	132.865	106.987	72.1477	83.5338	74.1955	119.469	86.2258	106.184
ENSG00000073008	PVR	90.1772	71.14	109.314	86.9206	106.887	89.6271	95.5551	123.547	88.5702	108.782	82.2942	93.6913	106.216	105.048	127.319	108.443	124.251	111.075	105.742	101.151	126.66	100.974	147.942	123.354	103.054	105.609	116.174	146.576	135.382	148.191
ENSG00000073050	XRCC1	99.9465	84.4788	86.1089	85.9215	73.0622	92.6483	89.1054	100.706	55.8835	80.7787	74.7269	83.8772	87.7434	75.71	84.0553	85.7683	91.5568	86.2901	79.023	77.8087	77.4035	77.9264	141.924	113.538	85.5057	109.458	84.9344	109.43	120.071	110.852
ENSG00000073060	SCARB1	140.47	122.272	148.274	175.94	171.962	167.319	156.919	188.945	161.324	143.248	148.508	144.554	152.396	138.609	153.278	192.239	206.657	180.414	201.973	231.456	207.33	195.325	238.553	242.359	144.295	172.505	166.939	59.8839	57.4426	74.7262
ENSG00000073111	MCM2	502.497	585.022	623.143	693.465	638.205	620.422	872.697	998.712	773.71	849.665	896.482	857.771	909.565	906.782	918.644	887.255	932.126	979.405	966.125	1037.94	987.718	857.033	1270.61	1120.65	803.44	839.777	772.941	279.099	289.236	291.831
ENSG00000073150	PANX2	27.8046	40.0162	33.4265	26.9754	28.4131	35.2467	29.2516	26.9934	25.3058	35.5426	21.7559	24.9847	27.7084	30.284	18.5416	27.6036	43.1625	25.7034	23.8157	19.4522	25.8012	21.3497	39.2556	29.4761	22.675	26.8844	29.7759	16.0631	14.5053	19.8366
ENSG00000073169	SELENOO	39.8283	55.5781	41.377	57.9471	42.6196	57.3466	53.6279	54.8661	49.5571	42.0049	40.5186	43.4225	45.3453	49.2115	36.0623	46.3346	57.55	53.6591	49.7715	52.5492	57.4662	41.8704	54.3539	53.0123	53.5019	33.6055	48.2664	39.9918	56.3644	60.018
ENSG00000073282	TP63	0	0	0.45171	0	0	0	0	1.03821	0	0	0	0	0	19.8739	1.23611	0	0	0	0	0	1.17278	0	0	0	13.3989	14.4024	13.1795	270.061	283.659	278.88
ENSG00000073350	LLGL2	142.781	140.057	146.354	176.838	155.595	148.036	128.707	148.464	113.876	95.8574	113.509	121.354	115.452	143.849	116.194	123.23	136.027	139.533	126.7	124.494	125.487	106.749	155.512	134.28	136.05	136.343	143.51	236.93	214.356	220.537
ENSG00000073417	PDE8A	53.3548	55.5781	51.9466	52.9516	46.6786	51.3594	39.9771	15.5731	25.3058	22.6181	27.4314	24.9847	22.3207	32.1768	18.5416	76.8956	87.6329	92.716	84.784	80.7265	92.6497	93.9387	61.903	81.8781	95.8534	96.0158	102.019	80.3154	84.6141	73.5122
ENSG00000073464	CLCN4	69.1359	75.5862	74.5321	68.937	61.5616	55.3876	67.2786	70.5982	53.7747	51.6984	42.566	54.4309	53.1078	68.139	51.9165	86.7541	99.4046	100.978	101.931	113.795	92.6496	84.3314	98.139	93.8869	12.3682	23.0438	23.9183	10.0394	14.5053	22.1704
ENSG00000073536	NLE1	97.692	135.611	126.027	162.807	133.271	130.916	175.509	193.107	147.484	180.889	187.29	172.18	170.869	158.045	165.638	175.48	150.415	149.631	156.1	161.453	206.409	166.528	232.514	211.721	85.5466	104.657	97.1375	72.2839	61.2445	67.6779
ENSG00000073578	SDHA	203.06	187.073	206.852	251.249	244.755	170.853	236.609	275.817	183.224	179.244	191.879	213.23	189.334	204.861	216.147	237.107	219.255	225.064	188.748	218.328	256.22	208.157	273.29	245.273	208.343	184.411	190.883	215.874	228.047	207.502
ENSG00000073584	SMARCE1	920.96	893.633	914.65	882.69	870.265	908.389	821.375	636.399	871.074	954.41	966.582	972.898	879.902	900.74	959.148	1006.12	963.922	924.253	970.694	966.277	973.252	905.073	515.253	625.435	1003.04	1039.57	1008.39	1130.22	1142.5	1022.01
ENSG00000073605	GSDMB	25.5502	17.785	20.7786	30.9717	23.0011	21.148	26.3264	26.9934	22.1425	11.8476	11.3509	22.3078	24.6297	21.7666	16.0694	8.87258	18.3114	12.8517	17.1473	30.1509	16.4189	21.3497	13.5885	19.6507	44.3193	39.3665	37.5859	61.2405	73.3322	73.5122
ENSG00000073614	KDM5A	288.567	322.353	294.515	229.79	242.188	223.565	393.921	365.45	350.063	369.428	393.499	343.539	387.149	388.014	342.402	354.903	409.39	354.34	357.236	362.783	376.462	359.743	298.946	339.521	397.843	384.063	427.601	543.133	531.054	525.087
ENSG00000073670	ADAM11	21.7928	24.4544	27.5543	18.9827	18.942	20.1409	26.3264	19.726	13.7073	20.4639	13.2427	15.1693	16.9329	17.0347	17.3055	22.6744	23.5432	29.3754	40.9631	29.1783	26.9739	35.227	45.2949	20.7425	41.2273	27.8446	41.9791	6.02366	17.7287	7.00117
ENSG00000073711	PPP2R3A	144.284	182.296	136.868	170.844	185.361	164.149	207.686	86.1714	237.241	213.256	196.749	198.985	207.044	197.792	215.083	112.386	201.425	126.681	148.61	109.905	125.487	166.528	46.8047	92.7952	229.842	241	257.244	342.344	314.281	308.051
ENSG00000073712	FERMT2	1197.1	1133.79	1073.26	1008.08	1020.84	1047.33	818.07	579.321	850.906	962.884	912.802	870.897	958.248	898.11	982.705	1149.49	1140.53	1091.47	1099.33	1063.06	1040.26	1160.36	418.223	699.786	1078.09	999.525	1039.71	715.811	726.875	732.789
ENSG00000073756	PTGS2	6.01181	8.8925	4.96881	10.99	6.08851	3.37888	2.92516	1.03821	1.05441	4.3082	2.83773	8.9231	3.84839	9.46375	1.23611	3.94337	11.7716	5.50788	2.85789	4.86304	7.03668	7.4724	4.52949	4.36683	56.6875	48.0079	53.6942	26.1025	35.4573	35.0058
ENSG00000073792	IGF2BP2	665.51	657.491	596.182	688.917	659.825	726.521	637.371	625.628	602.754	567.185	535.885	530.359	565.199	596.011	540.879	523.989	564.714	547.019	528.361	563.519	596.274	587.89	673.089	646.811	676.566	662.993	640.574	869.955	885.098	833.468
ENSG00000073803	MAP3K13	104.371	108.933	88.1877	106.827	113.371	119.441	92.6299	80.9803	107.138	125.827	93.1188	104.4	115.452	98.4012	107.541	90.6975	96.7886	98.3735	90.6419	97.5994	84.5337	91.8038	61.903	96.0704	110.09	100.19	101.173	131.814	136.994	141.905
ENSG00000073849	ST6GAL1	427.591	489.088	510.435	632.421	587.2	559.918	667.909	704.947	593.633	590.224	593.085	618.371	608.048	604.735	559.957	535.312	576.808	583.835	439.162	470.742	473.803	360.81	481.636	436.684	330.848	350.457	319.235	128.505	112.819	129.522
ENSG00000073905	VDAC1P1	81.8644	65.9723	82.3649	99.6764	100.538	103.266	104.049	137.67	99.7392	93.4894	117.93	118.93	112.711	97.9614	107.829	115.977	99.0369	128.9	105.055	92.7658	115.267	99.4594	101.714	115.891	99.4104	90.5779	93.8665	87.837	85.1987	99.2195
ENSG00000073910	FRY	58.6152	66.6938	65.9497	35.9671	49.3846	49.3453	40.9522	42.5666	28.469	28.0033	32.161	26.7693	35.4052	61.5144	29.6666	26.6177	17.0034	25.7034	34.2946	21.3974	31.6651	25.6197	25.6671	25.1093	69.0556	88.3346	86.3988	241.95	274.795	233.372
ENSG00000073921	PICALM	512.506	560.227	437.255	509.535	527.672	518.63	462.175	368.565	577.816	518.061	528.764	536.278	506.449	491.169	529.054	490.949	485.25	458.072	557.289	510.619	508.987	570.038	227.985	292.578	637.993	539.609	582.339	846.328	829.219	834.303
ENSG00000073969	NSF	227.697	237.874	220.886	209.808	194.156	240.684	252.539	274.087	262.547	272.494	281.881	276.616	277.915	277.288	322.624	282.937	260.283	313.031	353.426	343.331	368.254	292.491	295.926	337.338	290.653	305.33	306.721	243.958	236.92	246.208
ENSG00000074047	GLI2	178.1	184.519	184.749	165.849	159.655	173.212	236.938	246.055	254.112	232.643	189.182	259.662	231.673	236.594	248.457	217.871	219.736	198.283	156.231	136.165	152.461	130.233	175.14	185.59	118.528	132.502	124.473	67.2642	83.0024	71.1785
ENSG00000074054	CLASP1	477.577	466.856	452.255	424.612	461.269	436.391	448.524	471.348	434.414	430.82	468.207	457.755	463.306	469.402	468.485	380.173	425.085	390.141	439.162	449.345	428.405	505.988	428.792	480.351	656.546	564.572	585.268	519.038	547.976	507.585
ENSG00000074071	MRPS34	404.286	436.312	404.318	418.116	405.169	399.787	440.527	517.66	416.898	419.544	459.603	430.605	396.489	403.234	434.734	438.182	499.913	469.728	425.06	470.168	479.008	398.992	578.411	532.106	359.295	331.745	380.478	207.515	202.928	250.175
ENSG00000074181	NOTCH3	325.389	442.402	411.508	384.649	389.665	289.022	557.731	574.129	461.83	535.295	456.875	562.154	557.247	594.322	568.61	583.619	685.368	551.707	520.135	498.947	616.882	562.564	773.033	709.611	706.016	750.844	761.971	714.808	750.247	703.617
ENSG00000074201	CLNS1A	662.05	631.367	666.723	690.37	694.766	682.779	826.843	909.472	818.22	840.101	811.591	801.294	744.279	754.261	794.817	901.061	843.63	850.051	784.015	762.525	806.873	781.399	747.366	822.057	569.967	592.417	535.964	465.83	464.975	477.246
ENSG00000074211	PPP2R2C	39.0768	24.4544	37.4919	45.958	47.3551	41.2889	37.052	47.7576	28.469	34.4656	36.8905	18.7385	29.2478	24.6057	29.6666	34.5045	37.9307	40.3911	49.5367	48.6304	42.2201	28.8221	31.7064	32.7512	24.7364	25.9243	36.6096	4.01577	10.476	8.16803
ENSG00000074219	TEAD2	278.046	226.759	282.057	300.725	295.631	274.924	387.095	469.271	382.749	416.818	403.903	422.057	407.156	408.831	402.971	447.572	333.528	445.219	444.876	447.4	424.545	408.846	573.735	542.578	367.953	393.665	364.144	328.289	325.562	345.39
ENSG00000074266	EED	114.976	100.041	137.771	123.887	121.094	114.803	130.657	141.196	161.324	174.482	165.534	159.724	177.796	144.795	138.444	170.551	154.339	179.924	167.663	170.206	160.671	155.853	116.257	158.298	153.572	163.227	171.821	121.477	149.082	109.685
ENSG00000074317	SNCB	17.284	11.1156	17.165	8.99179	16.9125	9.06342	16.5759	14.5349	13.7073	6.4623	6.62138	11.6	5.38775	11.3565	16.0694	4.92921	13.0795	11.9337	12.3842	8.75348	9.38224	7.4724	6.03932	8.73367	3.09204	1.92032	2.44064	0	0.805849	1.16686
ENSG00000074319	TSG101	304.348	311.237	289.998	259.763	285.484	268.882	269.115	268.896	265.71	254.184	266.747	250.74	243.218	286.752	223.735	251.39	253.743	242.347	270.547	271.358	329.551	256.196	317.861	267.468	315.389	289.803	298.246	370.455	383.584	358.227
ENSG00000074356	NCBP3	347.182	351.254	332.91	376.656	343.663	394.763	416.347	408.016	462.885	446.976	390.661	447.048	421.784	447.635	400.498	419.969	457.784	447.975	515.372	484.359	485.531	375.755	394.066	375.547	396.813	413.828	417.838	403.585	392.448	388.565
ENSG00000074370	ATP2A3	84.1654	91.1481	90.342	110.899	94.7103	99.6977	71.1788	86.1714	56.9379	51.6984	69.0515	60.6771	63.8833	57.7289	56.8609	81.8248	60.1659	68.8485	58.1104	67.11	50.4295	59.7792	101.159	78.603	41.2273	72.9721	72.243	14.0552	10.476	17.5029
ENSG00000074410	CA12	30.0591	31.1238	24.844	16.9845	23.6776	22.155	30.2266	29.0699	28.469	15.0787	30.2691	26.7693	26.1691	57.7289	33.3749	28.5894	27.467	22.0315	35.2473	37.9317	30.4923	57.6442	52.8441	41.4849	784.346	873.747	789.795	460.809	423.876	453.908
ENSG00000074527	NTN4	6.01181	8.8925	9.93761	0	5.41201	10.0705	9.75052	6.22926	6.32644	4.3082	7.56728	1.78462	4.61807	2.83912	3.70832	12.8159	24.8511	13.7697	12.3842	8.75348	11.7278	10.6749	4.52949	8.73367	4.12273	9.60159	7.32193	0	1.6117	4.66744
ENSG00000074582	BCS1L	61.6211	57.8013	59.174	49.9544	64.9442	86.6061	68.2536	74.9352	53.7747	51.6984	52.0251	61.6571	64.5239	53.9434	58.097	74.924	62.1514	60.7666	80.9735	81.6991	83.2674	58.7117	80.1739	69.8693	31.9511	50.1783	45.396	46.1814	36.2632	45.5076
ENSG00000074590	NUAK1	196.887	175.627	183.394	120.89	147.477	156.092	133.582	132.891	109.658	109.859	87.0238	102.616	198.577	218.613	168.111	200.126	211.889	217.561	240.063	248.015	259.184	336.258	410.674	374.456	323.634	323.573	330.463	682.681	585.852	746.791
ENSG00000074603	DPP8	284.058	277.89	248.891	266.756	292.249	218.529	261.314	153.655	284.69	248.799	256.342	237.354	246.297	265.932	259.583	203.084	240.664	191.858	228.631	179.933	184.126	209.227	70.962	98.2537	273.131	267.884	272.863	274.076	244.172	301.05
ENSG00000074621	SLC24A1	110.467	91.1481	92.6005	89.9178	83.8862	97.6836	52.6481	45.6812	42.1763	48.4672	51.8976	51.7541	46.1807	62.4607	40.7915	50.2779	43.1625	46.8172	76.2103	78.7811	69.194	56.5767	57.3735	55.6771	56.6869	66.2509	50.2773	104.41	97.7646	115.519
ENSG00000074657	ZNF532	1553.71	1608.65	1495.37	1469.95	1471.25	1501.28	1351.02	1363.42	1322.19	1349.55	1306.67	1366.87	1355.8	1339.93	1387.09	1459.56	1613.39	1485.92	1508.86	1483.07	1609.97	1202.21	1222.19	1230.4	1079.21	1061.39	1047.08	1131.84	1095.83	1058.88
ENSG00000074660	SCARF1	7.51477	8.8925	9.03419	6.99361	14.883	15.1057	5.85031	7.26747	4.21763	3.23115	4.72955	4.46155	3.07871	5.67825	6.18054	0	1.30795	4.5899	0.952629	0.972609	5.8639	5.33743	3.01966	2.18342	1.03068	0	0	0	1.6117	0
ENSG00000074695	LMAN1	967.902	1200.49	941.362	1012.07	1057.37	947.63	663.036	334.303	1050.19	982.27	1062.26	939.602	859.731	832.811	982.706	740.368	902.489	667.371	619.209	572.866	448.002	834.774	250.632	255.46	1042.02	1029.29	1036.79	1291.07	1295	1290.55
ENSG00000074696	HACD3	938.596	1129.35	933.68	1161.94	1133.14	1080.57	1397.25	1318.53	1416.06	1288.15	1255.22	1261.73	1301.53	1246.37	1268.25	1327.93	1358.96	1387.07	1327.97	1334.42	1353.39	1338.63	1437.36	1433.41	1219.3	1304.86	1236.44	1067.19	1046	1096.85
ENSG00000074755	ZZEF1	105.958	106.71	113.379	108.901	120.417	98.6906	130.657	160.922	123.366	116.321	124.86	141.877	143.93	168.455	139.68	128.159	156.955	137.697	160.994	179.933	158.325	147.313	218.925	196.507	224.689	185.311	204.038	250.986	211.132	266.044
ENSG00000074800	ENO1	3598.28	3240.53	4016.67	3814.35	3750.99	3462.77	4695.7	5521.52	3808.68	4446.81	4771.45	4825.45	4666.7	4345.23	4520.11	4945.69	3998.98	4888.95	4859.61	4979.89	4987.42	4463.5	5962.43	5523.96	4061.5	4066.21	3998.28	2999.4	3126.77	3236.84
ENSG00000074842	MYDGF	66.13	82.2556	79.0492	80.926	88.6217	66.4651	75.079	110.05	88.5701	100.166	79.4565	90.1234	82.3556	103.155	98.8886	87.7399	112.484	115.665	107.647	116.713	107.896	100.344	150.983	122.271	73.1784	93.1354	93.7207	103.406	107.178	114.352
ENSG00000074855	ANO8	81.1595	106.71	90.7936	80.9261	73.7387	80.5638	72.1539	79.9421	67.482	76.4705	81.3483	91.0157	83.895	84.2274	87.7636	72.9523	94.1727	64.2586	79.0682	87.5348	77.4035	66.1841	77.0013	78.603	45.35	48.9681	65.8973	74.2918	74.1381	80.5135
ENSG00000074935	TUBE1	207.408	217.866	182.491	217.801	219.187	250.755	104.331	50.8723	101.223	96.9345	77.5647	80.308	83.895	66.2462	85.2914	127.174	139.951	103.732	142.894	120.603	102.032	149.448	55.8637	92.7952	54.6261	82.5736	63.4567	48.1893	48.3509	35.0058
ENSG00000074964	ARHGEF10L	123.242	115.603	119.251	138.873	120.417	147.029	97.5052	126.662	82.2437	95.8574	94.5911	102.616	86.204	103.155	98.8886	116.329	111.176	123.009	103.837	100.179	117.278	87.5338	120.786	105.896	99.9761	90.2548	89.8156	71.2799	102.343	87.5146
ENSG00000075035	WSCD2	12.7751	11.1156	9.93761	9.99087	12.177	9.06343	3.90021	12.4585	5.27203	3.23115	3.78364	6.24617	7.69679	8.51737	3.70832	9.85842	10.4636	15.6057	12.3842	6.80826	5.8639	17.0798	25.6671	17.4673	31.9511	22.0836	28.3115	40.1577	53.186	46.6744
ENSG00000075043	KCNQ2	133.011	131.164	157.647	158.855	156.948	137.965	136.507	122.509	146.562	127.092	115.401	111.539	110.064	120.19	114.958	108.443	130.795	117.501	120.031	106.987	116.105	97.1412	138.904	121.18	70.0863	75.8525	89.8157	27.1065	27.3988	35.0058
ENSG00000075089	ACTR6	161.568	231.205	168.036	176.838	221.892	175.226	139.432	59.1779	206.663	174.482	176.885	171.324	154.705	156.152	159.458	173.508	200.117	166.154	127.652	119.631	116.105	172.933	48.3146	55.6771	162.848	187.61	191.347	197.777	184.539	165.694
ENSG00000075131	TIPIN	142.677	133.388	145.451	125.885	154.919	139.84	107.256	84.0951	117.93	124.938	127.698	99.9388	119.963	121.136	110.014	98.5842	107.252	100.978	91.4525	101.151	75.058	105.463	45.295	60.044	102.652	100.817	104.948	63.2484	61.2445	52.5088
ENSG00000075142	SRI	307.349	309.014	289.094	307.719	280.734	297.831	368.554	377.685	384.199	344.656	333.907	358.632	318.465	347.305	367.124	365.748	343.992	323.088	335.326	339.234	325.882	282.884	285.154	304.587	202.891	214.031	206.478	276.947	267.542	245.917
ENSG00000075151	EIF4G3	548.578	517.988	558.313	538.508	534.436	519.636	690.336	551.289	676.928	725.931	634.707	674.587	668.85	627.446	631.651	546.156	583.347	559.967	611.588	666.238	659.103	672.516	460.499	524.021	755.489	769.087	781.007	658.586	647.901	631.272
ENSG00000075188	NUP37	148.792	191.189	161.712	186.829	165.066	177.24	235.963	226.33	203.5	205.717	206.208	232.893	192.42	194.953	210.138	190.267	217.12	194.612	225.773	228.563	195.854	258.331	264.22	248.909	214.382	224.677	213.312	201.793	199.85	222.87
ENSG00000075213	SEMA3A	398.282	391.27	375.824	407.628	409.959	477.34	249.613	133.929	367.988	386.661	396.336	328.37	379.452	279.181	391.846	268.149	266.823	240.511	252.447	229.536	189.99	305.301	81.5309	102.621	316.419	278.446	299.223	152.599	148.276	164.527
ENSG00000075218	GTSE1	112.722	124.495	118.8	114.895	115.682	102.719	179.41	202.451	161.324	186.33	173.102	192.739	180.874	192.114	179.236	172.522	201.425	207.464	241.968	290.81	272.085	230.577	324.614	283.844	250.456	257.323	240.648	217.856	214.356	229.872
ENSG00000075223	SEMA3C	3.75738	11.1156	6.77565	4.99544	2.70601	4.02819	0.975052	3.11463	1.05441	1.07705	3.78364	1.78462	3.07871	47.3188	0	1.97168	2.61591	1.83596	4.76315	0.972609	1.17278	34.1595	7.54915	4.36683	579.243	476.239	581.361	541.125	558.453	603.267
ENSG00000075234	TTC38	61.6211	80.0325	66.4013	67.9379	76.4447	59.4158	93.605	86.1714	70.6452	94.7804	81.3483	101.723	80.0466	74.7636	88.9997	68.0231	51.0102	87.2081	87.6419	88.5074	80.9218	61.9142	105.688	93.8869	71.117	73.9322	65.4092	83.3272	89.4492	75.846
ENSG00000075239	ACAT1	193.129	186.742	198.692	220.798	191.978	172.205	169.659	168.152	200.337	172.328	161.751	164.185	160.765	121.136	159.458	158.721	188.345	156.975	138.131	164.125	141.696	135.571	141.924	154.962	124.712	114.259	110.805	84.3312	87.8375	74.6791
ENSG00000075240	GRAMD4	70.6388	48.9088	53.7535	80.926	71.0327	71.5004	82.8794	84.0949	87.5157	62.4689	69.0514	89.231	64.653	94.6374	80.3469	72.9523	69.3216	75.2743	66.684	64.1922	63.3301	51.2393	72.4719	68.7776	83.4852	95.0557	80.053	117.461	127.324	142.357
ENSG00000075275	CELSR1	163.07	166.734	155.388	127.883	136.653	150.05	138.457	119.394	126.529	132.477	120.131	137.416	153.166	146.688	129.791	158.721	188.345	156.975	159.089	185.768	179.435	106.749	144.944	157.206	145.326	172.829	163.035	153.603	116.848	133.022
ENSG00000075292	ZNF638	1126.46	1058.21	1094.04	1030.06	1058.05	1240.68	530.428	332.227	907.843	1208.45	1399.94	1034.19	1216.09	940.696	1174.3	958.24	1192.85	761.004	859.273	592.319	569.971	1140.07	335.182	334.062	1477.99	1461.37	1430.22	1341.26	1362.69	1332.55
ENSG00000075303	SLC25A40	124.745	155.619	119.703	135.876	117.4	133.937	107.256	75.0663	112.821	102.32	114.455	97.2618	130.076	88.9593	93.9441	114.615	104.636	109.24	103.837	82.6717	98.5135	119.558	27.1769	58.9523	129.866	144.984	148.391	158.623	171.646	155.193
ENSG00000075336	TIMM21	168.331	184.519	172.553	159.854	161.684	163.142	170.634	151.579	197.174	157.249	181.615	173.108	162.402	158.991	165.638	200.126	185.73	174.416	161.947	183.823	187.645	152.651	111.727	109.171	166.97	138.263	139.605	115.453	97.5077	112.019
ENSG00000075340	ADD2	1058.83	1058.21	1131.08	1264.85	1303.63	1288.01	1343.63	1472.18	1271.61	1326.93	1347.92	1408.96	1412.36	1355.21	1457.37	1258.92	1289.64	1373.3	1353.68	1397.64	1378.02	1122.99	1570.23	1435.59	364.862	492.562	409.539	198.781	190.986	224.037
ENSG00000075388	FGF4	5.26034	4.44625	8.58248	10.99	8.11802	10.0705	13.6507	5.19105	9.48966	16.1557	17.9723	13.3847	103.137	98.423	92.708	109.428	119.024	111.076	92.405	88.5074	96.168	52.3068	81.5308	73.1445	19.5829	12.4821	11.7151	5.01971	3.22339	5.83431
ENSG00000075391	RASAL2	365.217	386.824	340.137	328.699	334.869	365.559	273.99	205.565	325.812	278.82	304.584	276.616	312.49	303.786	302.846	280.964	304.753	266.214	388.672	391.962	336.588	312.39	214.396	225.984	194.799	185.311	203.55	220.867	226.444	194.866
ENSG00000075399	VPS9D1	9.7692	4.44625	6.77564	7.9927	6.76502	12.0846	4.99432	7.5438	2.18823	5.38525	5.77928	9.08102	5.38775	6.72861	6.3602	9.03667	6.53977	5.56667	6.6684	14.5891	5.8639	6.40491	13.8833	4.36683	10.7408	14.01	10.7388	23.0907	22.5638	15.1692
ENSG00000075407	ZNF37A	87.9228	80.0325	88.0263	58.7377	59.5322	83.524	46.8025	23.7965	70.0211	81.8557	74.73	82.0925	86.9442	60.418	73.3961	53.6365	73.2454	51.4069	72.3998	51.5513	44.5656	76.859	25.6671	31.4636	71.117	69.1314	83.5898	57.2247	62.8284	61.8436
ENSG00000075413	MARK3	525.282	566.897	493.719	460.579	490.464	486.404	433.898	421.513	399.62	408.202	372.689	395.294	337.889	379.496	389.374	318.427	325.681	363.52	444.878	370.564	379.981	358.675	368.399	393.015	364.861	366.781	340.226	372.463	427.1	350.058
ENSG00000075415	SLC25A3	1280.51	1338.32	1415.2	1629.51	1605.34	1463.24	1908.18	2120.02	1731.34	1842.83	1735.74	1777.48	1690.12	1677.92	1794.83	1790.3	1674.18	1857.99	1686.15	1757.51	1807.26	1642.86	2186.23	2019.66	1739.79	1725.4	1723.09	1928.57	1965.47	1859.97
ENSG00000075420	FNDC3B	261.514	268.998	245.278	239.781	276.689	274.924	242.788	199.336	255.167	277.879	247.828	231.108	243.219	274.448	283.068	268.149	296.906	195.53	310.557	261.631	256.839	305.301	163.062	215.067	400.936	440.712	430.041	498.96	493.18	515.752
ENSG00000075426	FOSL2	26.3017	24.4544	27.1026	15.9854	18.942	17.1198	20.4761	25.9552	23.1969	16.1557	6.62137	14.277	56.1866	55.8361	56.8609	66.0514	49.7023	44.0631	52.3946	52.5209	48.084	33.0921	37.7458	53.4937	26.7977	19.2032	22.942	56.2208	44.3217	50.175
ENSG00000075429	CACNG5	45.8401	35.57	39.7505	48.9553	46.6786	34.2396	26.3264	20.7642	26.3602	29.0803	17.9723	30.3386	30.0175	28.3912	25.9583	36.4761	28.775	33.0473	58.1104	41.8222	55.1207	36.2945	39.2556	46.9435	36.0739	53.7689	29.2877	5.01971	5.64094	2.33372
ENSG00000075461	CACNG4	16.5325	17.785	20.7786	17.9836	16.9125	9.06343	32.1767	31.1463	30.5778	20.4639	17.0263	24.0924	23.86	28.3912	24.7221	48.3063	44.4704	62.4226	46.6788	67.11	76.2307	80.0614	134.375	106.987	97.9147	102.737	104.46	49.1932	47.5451	58.3431
ENSG00000075539	FRYL	272.035	344.584	273.736	291.733	286.837	266.868	216.461	125.623	280.472	274.648	299.854	267.693	288.63	295.269	288.013	200.126	257.667	214.807	265.784	249.96	212.273	285.019	95.1193	121.18	477.205	416.709	464.698	576.263	535.889	522.753
ENSG00000075568	TMEM131	329.147	284.56	279.156	283.741	271.954	291.037	264.239	237.75	261.493	276.802	208.1	262.339	270.157	281.073	257.11	182.381	247.203	202.873	299.126	275.248	295.541	295.694	221.945	218.342	467.929	431.111	488.129	487.916	452.887	474.913
ENSG00000075618	FSCN1	1046.22	1331.27	1195.74	1519.35	1541.01	1373.4	1522.69	1809.08	1532.98	1229.78	1276.51	1299.71	1341.32	1570.54	1365.9	1353.72	1787.73	1473.13	1566.66	1534.47	1568.08	2166.34	3091.66	2876.07	3689.75	4180.69	4050.46	2953.19	2921.53	3193.12
ENSG00000075624	ACTB	7515.87	8634.5	9249.98	9860.71	9575.84	8759.42	14800.4	16825.3	12955.1	13565.3	12316.1	13770.8	14271.4	14722.1	14610.4	15264.4	13922.5	15686.1	15008.9	15574.7	15920.7	13490.4	18438.4	17021.7	13265.2	13671.1	13471.4	13277.4	13053.5	13250.6
ENSG00000075643	MOCOS	230.703	211.197	199.656	176.838	205.656	188.318	124.807	112.127	80.1349	100.166	82.2942	94.5849	85.4343	87.0665	101.361	57.1788	68.0136	73.4384	54.2999	53.4935	68.0212	88.6013	70.962	81.8781	57.7182	64.3306	58.0873	39.1538	24.9813	21.0035
ENSG00000075651	PLD1	5.26034	11.1156	9.4859	12.9881	16.9125	16.1128	5.85031	1.03821	15.8161	4.3082	9.45911	12.4923	5.38775	11.3565	4.94443	7.88673	7.84773	7.34384	4.76315	2.91783	4.69112	2.13497	3.01966	5.45854	26.7977	26.8844	17.5726	15.0591	17.7287	12.8355
ENSG00000075673	ATP12A	15.0295	4.44625	21.6821	16.9845	16.9125	20.1409	2.92516	7.26747	4.21763	3.23115	3.78364	5.35386	6.15743	28.3913	4.94443	5.91505	1.30795	6.42586	4.76315	5.83565	7.03668	7.4724	4.52949	10.9171	358.677	415.748	376.836	383.506	452.886	416.569
ENSG00000075702	WDR62	134.514	142.28	147.709	128.882	128.535	109.768	182.335	195.183	159.215	171.251	144.724	161.508	173.178	176.026	170.583	135.06	166.11	175.334	151.468	171.179	168.88	162.258	202.317	200.874	112.344	147.864	136.188	63.2484	70.9147	70.0117
ENSG00000075711	DLG1	560.601	549.112	501.595	467.573	509.905	493.453	442.674	239.826	546.183	517.932	534.44	503.762	512.606	541.326	509.276	456.445	465.632	390.141	428.683	365.701	403.437	448.312	140.414	171.398	545.231	542.49	542.31	696.627	659.184	638.273
ENSG00000075785	RAB7A	414.064	382.378	447.192	524.521	495.199	474.319	636.709	737.13	625.263	602.071	644.164	609.447	585.726	573.503	566.138	626.008	566.345	616.884	610.635	660.401	645.029	649.03	801.719	701.97	642.115	688.434	628.222	600.357	574.569	595.099
ENSG00000075790	BCAP29	126.777	148.851	98.1032	112.941	123.681	137.583	67.8333	38.1886	98.0867	110.939	88.0439	84.29	98.5777	86.0612	87.4882	96.3968	106.397	78.2747	65.4077	72.6632	54.868	93.3559	30.4351	38.3159	148.688	153.185	128.145	179.875	149.314	138.052
ENSG00000075826	SEC31B	12.7396	6.66938	13.0996	15.6551	12.1295	16.1128	12.6757	9.34389	11.5114	9.00923	12.1487	5.54803	10.0052	7.48819	11.0803	4.18322	5.36683	3.67178	1.90526	7.0222	3.95907	6.94274	11.5727	6.5417	9.82219	8.54333	9.72539	24.5591	30.5716	24.9862
ENSG00000075856	SART3	350.789	359.673	412.331	466.737	489.033	411.678	530.061	670.222	557.998	535.039	589.479	535.81	525.146	534.314	503.897	542.66	500.01	521.919	593.162	591.302	601.101	535.364	693.838	617.443	512.993	517.965	528.204	386.142	346.538	417.454
ENSG00000075914	EXOSC7	156.307	135.611	187.906	177.838	167.096	137.965	163.259	196.222	126.529	154.018	166.48	161.508	137.772	177.919	139.68	175.48	146.491	161.564	156.231	149.782	166.535	140.908	190.239	173.582	107.191	99.8565	103.971	83.3272	81.3907	79.3466
ENSG00000075945	KIFAP3	31.562	46.6856	19.4235	26.9754	19.6185	26.1832	10.7256	28.0317	20.0337	16.1557	26.4855	18.7385	29.2478	32.1767	23.486	17.7452	24.8511	17.4416	36.1999	28.2057	34.0106	36.2945	27.1769	34.9347	39.1659	47.0478	39.5384	211.832	195.821	220.537
ENSG00000075975	MKRN2	156.119	139.551	158.445	170.981	150.491	181.458	186.872	173.515	164.504	182.848	151.276	155.632	149.38	179.142	162.045	152.134	176.847	177.162	205.697	163.002	175.089	178.291	197.131	169.803	179.572	196.062	164.922	171.69	169.08	185.086
ENSG00000076003	MCM6	992.701	989.291	1017.25	1001.09	1085.79	1035.24	1294.87	1398.47	1310.63	1198.76	1183.33	1140.37	1177.61	1129.97	1134.75	1195.83	1190.24	1211.73	1267.95	1381.1	1281.85	1290.59	1456.99	1519.66	1126.53	1244.37	1107.56	513.015	518.966	557.76
ENSG00000076043	REXO2	281.973	257.845	258.83	252.768	296.976	288.997	322.742	315.616	323.703	343.578	326.339	348.001	330.076	327.446	312.278	350.036	333.528	351.4	378.876	419.384	378.776	417.016	446.784	444.325	388.584	348.032	392.444	538.904	549.134	545.84
ENSG00000076053	RBM7	323.348	468.248	318.086	399.745	429.197	382.376	377.525	202.868	423.733	429.347	443.004	411.573	426.273	411.077	453.242	489.259	494.534	450.534	478.369	426.874	381.598	617.471	172.36	217.834	677.722	644.722	651.468	563.576	643.85	617.731
ENSG00000076067	RBMS2	46.7737	30.184	41.1721	56.0207	46.0536	43.6664	47.5951	51.2103	28.8933	27.5984	23.4406	28.3259	23.8275	33.8313	32.5488	12.8634	13.1801	21.3083	28.8053	20.4373	24.2893	40.3526	44.4046	34.3105	39.2155	47.8802	40.2854	55.9459	60.6831	68.8119
ENSG00000076108	BAZ2A	583.374	517.988	644.769	579.097	613.526	595.809	690.005	800.12	622.717	644.909	547.313	650.205	618.609	665.035	585.504	552.023	544.008	526.805	620.987	641.726	655.321	657.245	895.247	727.782	975.807	926.356	980.32	1013.52	1027.6	1128.06
ENSG00000076201	PTPN23	128.502	113.379	149.967	151.861	128.535	156.092	186.235	205.566	166.596	163.712	114.455	184.708	159.323	190.221	154.513	148.862	160.878	148.713	131.463	151.727	134.87	141.976	244.592	197.599	130.896	169.948	172.798	164.647	155.529	161.027
ENSG00000076242	MLH1	301.342	253.436	308.518	264.758	284.13	266.868	301.291	290.699	270.983	253.107	266.747	248.062	270.157	253.629	245.985	292.795	256.359	257.952	278.168	312.207	295.541	318.111	369.908	356.989	267.977	292.848	267.006	267.049	261.095	248.541
ENSG00000076248	UNG	453.89	520.212	513.14	648.404	625.085	542.798	862.918	929.193	785.53	842.254	824.837	860.184	831.249	825.235	839.318	927.67	911.64	954.694	888.801	910.366	932.361	875.337	1087.07	1086.24	673.036	747.964	725.841	397.561	377.942	397.9
ENSG00000076258	FMO4	11.2722	15.5619	9.4859	10.99	9.47102	8.05638	5.85031	6.22926	5.27203	2.1541	1.89182	1.78462	3.84839	9.46375	4.94443	7.88673	3.92386	6.42586	5.71577	3.89043	1.17278	2.13497	0	1.09171	11.3375	12.4821	6.34567	20.0789	23.3696	11.6686
ENSG00000076321	KLHL20	81.1595	86.7019	65.9496	65.9398	89.2982	78.5497	77.0291	67.4836	90.679	75.3935	77.5647	66.031	86.9737	74.7636	76.6386	75.9098	94.1727	79.8643	89.5471	99.2061	94.9952	53.3743	60.3932	78.603	85.5466	93.1354	82.0056	89.3509	85.4199	100.35
ENSG00000076351	SLC46A1	43.9757	55.5941	53.7767	60.8476	58.5301	45.6339	44.4121	39.1807	50.3203	45.5081	67.188	78.1149	54.1618	43.1996	58.7203	32.1157	37.6699	44.8402	51.8944	47.2584	53.5502	60.2343	83.2402	39.7181	33.8336	52.5559	40.9298	61.8944	42.4281	67.3069
ENSG00000076356	PLXNA2	24.0473	17.785	17.6167	37.9653	29.7661	34.2396	5.85031	4.15284	7.38085	9.69345	10.405	8.03079	11.5452	87.0665	6.18054	23.6602	28.775	21.1135	43.8209	33.0687	45.7384	37.362	49.8244	33.843	117.498	98.8963	120.568	1108.35	1165.25	1183.2
ENSG00000076382	SPAG5	497.478	475.749	533.922	523.518	535.786	535.75	542.129	608.38	485.027	561.143	600.638	629.971	593.402	591.479	582.189	541.213	553.265	568.23	583	629.259	655.563	598.86	673.384	657.179	632.677	651.948	616.006	483.895	454.486	541.415
ENSG00000076513	ANKRD13A	148.479	138.222	139.193	106.265	134.617	144.315	106.139	113.148	135.894	113.792	104.087	111.116	104.489	119.27	107.083	103.248	110.898	118.915	129.197	121.929	119.362	105.215	114.496	120.246	142.538	150.318	150.134	201.726	182.636	198.006
ENSG00000076554	TPD52	326.14	395.716	310.775	410.624	426.197	371.601	316.892	191.764	391.185	351.119	332.961	334.616	344.816	398.424	378.249	444.615	441.851	420.435	441.067	362.783	338.934	529.474	184.199	279.478	2021.17	1875.89	1869.52	1103	1050.83	1010.5
ENSG00000076555	ACACB	63.8755	73.3631	74.5321	87.9197	80.5037	69.4863	56.553	63.3308	49.5571	49.5443	54.8628	60.6771	53.1078	51.1043	61.8054	46.3346	45.7784	47.735	51.442	44.74	48.084	52.3068	48.3146	61.1357	38.1352	42.247	29.7758	15.0591	24.1755	12.8355
ENSG00000076604	TRAF4	338.165	333.469	324.078	360.667	384.253	424.974	432.099	481.816	344.148	404.971	376.472	439.017	372.585	419.244	347.391	320.012	313.096	356.176	352.473	369.591	363.106	360.81	512.729	438.837	495.758	433.991	476.712	598.642	640.289	626.145
ENSG00000076641	PAG1	3.75738	6.66938	4.96881	2.99726	4.05901	8.05638	8.77547	6.22926	8.43525	9.69345	4.72955	6.24617	8.46647	9.46375	6.18054	8.87258	19.6193	14.6877	17.1473	19.4522	25.8012	23.4847	7.54915	8.73367	9.27613	11.5219	11.227	6.02366	6.44679	4.66744
ENSG00000076650	GPATCH1	36.0709	44.4625	46.5261	40.9626	43.2961	32.2255	61.4283	47.7576	43.2307	58.1607	71.8892	57.1079	47.7201	50.1579	58.097	62.108	54.9341	69.7665	76.2103	61.2743	72.7123	64.0492	69.4522	63.3191	63.9023	76.8127	72.243	46.1814	65.2737	64.1774
ENSG00000076662	ICAM3	32.956	31.9975	33.0366	40.199	37.0513	44.6777	38.591	46.8313	37.3052	39.4354	32.1668	34.5741	28.8337	22.823	26.4487	34.0349	28.5555	23.7068	22.7795	41.6395	31.5547	31.8686	37.3061	36.9423	14.3868	21.7982	25.145	16.9269	12.7204	16.5128
ENSG00000076685	NT5C2	208.458	194.003	229.672	203.333	215.021	219.631	258.849	223.248	269.269	272.496	257.564	244.151	261.983	248.498	240.854	281.185	302.253	300.761	306.024	325.169	310.965	295.945	286.419	296.252	302.915	252.277	289.151	353.98	316.195	365.009
ENSG00000076706	MCAM	69.8873	68.9169	66.8531	67.938	54.1202	69.4863	41.9272	56.0633	36.9042	59.2377	55.8087	58.0002	60.8046	66.2462	66.7498	85.7682	83.7091	102.814	74.3051	82.6718	79.749	58.7117	67.9424	53.4937	82.4545	100.817	73.7074	50.1971	41.0983	43.1739
ENSG00000076716	GPC4	2068.06	2196.45	2240.48	1812.34	1971.33	1747.23	2462.01	2663.01	2371.36	2213.34	1861.55	2319.11	2298.26	2179.5	2419.06	2285.18	2367.4	2217.84	1870.96	1789.6	1971.44	1862.76	2322.12	2140.84	574.09	602.98	613.578	607.385	595.522	599.767
ENSG00000076770	MBNL3	51.1004	62.2475	60.5291	84.9224	81.8566	67.4721	42.9023	11.4203	69.5909	77.5476	91.7533	50.8617	89.2827	118.297	88.9998	105.485	119.024	74.3564	146.705	120.603	83.2674	430.195	101.159	129.913	1269.81	1303.88	1280.36	889.49	867.893	835.474
ENSG00000076826	CAMSAP3	86.4198	124.495	115.638	108.901	116.358	75.5286	129.682	114.203	129.692	119.553	91.7533	123.139	118.531	108.833	127.319	73.9381	112.484	87.2081	73.3524	90.4526	79.7491	87.5338	114.747	121.18	110.283	106.578	131.306	144.568	149.082	182.03
ENSG00000076864	RAP1GAP	39.8283	40.0163	44.2676	30.9717	31.1191	39.2748	27.3015	37.3755	32.6866	16.1558	28.3773	25.877	30.0175	25.5521	22.2499	20.7027	24.8511	28.4574	13.3368	18.4796	18.7645	22.4172	16.6081	16.3756	19.583	11.5219	14.1557	7.0276	11.2819	11.6686
ENSG00000076924	XAB2	155.556	200.081	191.074	212.806	215.804	197.381	196.96	257.476	199.283	221.872	200.533	200.77	197.807	234.701	208.902	206.041	251.127	221.233	231.489	245.097	221.656	217.767	306.496	245.634	210.259	207.394	222.099	242.954	241.754	245.041
ENSG00000076928	ARHGEF1	154.804	115.602	140.03	153.859	153.566	152.064	95.5551	111.088	106.495	99.0886	120.131	117.785	92.3614	113.565	101.361	100.556	99.4046	92.716	100.979	99.2061	93.8224	106.749	157.022	147.381	101.007	95.0557	104.948	139.548	155.529	134.189
ENSG00000076944	STXBP2	59.2482	77.8094	95.967	107.893	83.4815	81.4195	91.5668	90.9171	65.3731	73.837	74.4732	73.6936	83.0174	81.388	97.6401	92.6688	75.8528	91.8581	99.541	96.3245	96.0997	83.769	131.867	108.069	76.5761	85.1404	93.2325	165.651	152.862	168.024
ENSG00000076984	MAP2K7	164.573	153.396	164.422	136.875	127.182	173.212	171.609	235.673	151.835	169.097	172.156	190.062	164.711	174.133	166.875	165.621	163.494	179.924	209.578	190.631	194.681	156.92	231.004	204.149	179.339	176.669	171.333	133.524	133.771	122.52
ENSG00000077009	NMRK2	69.1358	60.0244	81.7594	53.9507	69.0032	71.5003	103.356	77.8658	79.0805	92.6263	88.9156	102.616	89.2828	82.3346	74.1664	99.57	79.7852	89.962	89.5471	91.4252	102.032	81.1289	99.6488	99.3454	61.8409	58.5697	59.5517	14.0552	15.3111	12.8355
ENSG00000077044	DGKD	120.988	95.5944	111.121	112.897	113.652	115.81	110.181	110.05	94.8966	71.0853	81.3483	92.8004	93.131	87.0665	100.125	85.7682	79.7852	85.3722	63.8261	69.0552	63.3301	71.5215	92.0996	57.8605	76.2704	80.6533	86.8869	94.3706	96.7018	93.3489
ENSG00000077063	CTTNBP2	144.284	164.511	151.775	113.896	109.593	116.818	177.46	171.305	159.216	180.945	176.885	177.57	177.796	222.398	165.638	125.202	147.799	134.025	106.694	112.823	119.624	89.6688	77.0013	62.2274	119.559	115.219	120.08	607.384	597.133	596.267
ENSG00000077092	RARB	2.25443	0	1.35513	1.99817	1.353	0	1.9501	1.03821	2.10881	1.07705	0.945911	0.89231	5.38775	5.67825	2.47221	0.985842	2.61591	0.91798	0.952629	0	1.17278	2.13497	0	3.27512	4.12273	4.80079	4.88129	74.2918	70.1088	65.3442
ENSG00000077097	TOP2B	1850.11	1927.46	1748.58	1908.27	1911.8	1790.54	1297.8	613.582	1880.01	1801.92	1835.06	1815.85	1787.98	1739.45	1749.1	1535.94	1802.37	1466.92	1387.03	1242.02	1182.16	1616.17	466.538	522.927	1731.55	1773.42	1852.92	2116.3	2188.66	2115.54
ENSG00000077147	TM9SF3	1082.13	1367.22	1069.2	1238.86	1214.98	1049.34	1291.93	764.119	1544.72	1474.47	1573.04	1414.32	1444.68	1431.85	1456.13	1337.81	1504.15	1331.98	1240.33	1113.64	1121.18	1278.86	493.714	650.657	1674.85	1602.49	1706.05	1816.13	1941.3	1862.28
ENSG00000077150	NFKB2	112.721	100.041	86.7282	70.9352	62.9146	77.5427	56.553	45.6812	44.2851	31.2345	34.9987	41.9386	34.6355	42.5869	42.0276	45.3487	41.8545	38.5552	25.721	18.4796	26.9739	24.5522	39.2556	31.6595	44.3193	53.7689	52.2297	55.2168	54.7977	54.8425
ENSG00000077152	UBE2T	34.5679	48.9087	53.7535	43.9598	50.0611	61.4299	67.2786	49.8341	47.4483	48.4672	48.2414	62.4617	40.793	59.6216	53.1526	51.2638	48.3943	55.0788	52.3946	68.0826	71.5396	51.2393	60.3932	52.402	46.3807	54.729	47.3485	29.1143	38.6807	26.8378
ENSG00000077157	PPP1R12B	115.712	82.8968	97.5023	101.51	97.083	104.353	92.5684	96.5305	95.1901	83.9978	106.146	81.4417	92.5199	100.909	109.341	63.2574	106.707	75.4679	88.7927	87.6319	116.262	88.5204	98.9223	82.1525	112.515	98.081	106.034	124.489	116.747	94.5157
ENSG00000077232	DNAJC10	1000.97	1140.46	903.873	970.114	986.342	876.131	764.441	405.94	1126.1	1152.44	1255.22	1069.88	1112.95	984.23	1133.51	1173.15	1132.69	994.172	990.735	884.101	745.889	981.02	229.494	328.604	1008.01	1085.94	1008.97	940.694	900.132	877.48
ENSG00000077235	GTF3C1	442.62	537.996	551.535	541.505	541.202	463.242	768.341	903.243	708.562	785.169	739.702	803.971	793.539	801.579	768.859	683.188	762.536	788.546	837.36	791.707	827.983	736.565	1156.53	879.916	686.434	833.418	788.327	528.074	558.453	603.266
ENSG00000077238	IL4R	111.219	64.4706	111.784	126.884	138.006	130.916	97.5052	129.957	73.8084	101.243	91.7533	99.0465	108.525	102.209	114.958	110.414	117.716	122.091	85.7367	85.5895	86.7857	76.859	119.277	93.8869	68.025	68.1713	64.7344	74.2918	75.7498	77.0128
ENSG00000077254	USP33	571.122	640.26	576.834	670.387	675.826	702.92	520.678	299.004	673.766	555.758	609.165	557.694	546.473	562.147	542.651	489.963	571.576	524.166	492.509	458.098	462.075	488.908	157.022	295.853	613.255	560.733	560.373	595.337	549.588	556.593
ENSG00000077264	PAK3	142.781	140.057	137.771	106.902	99.4457	112.789	98.4802	79.9421	139.182	126.015	111.617	113.323	113.912	110.726	100.125	65.0656	66.7057	59.6687	74.3051	86.5621	80.9218	89.6688	42.2753	44.76	69.0557	76.8127	73.7074	207.816	191.792	203.034
ENSG00000077274	CAPN6	57.8637	33.3469	60.5291	70.9352	77.7977	58.4087	73.1289	61.2544	74.8629	73.2394	66.2137	68.7079	65.4227	107.887	70.4581	51.2638	78.4773	55.9968	64.7788	71.0004	86.7857	97.1412	108.708	98.2537	64.9329	72.972	54.1823	573.251	545.559	561.26
ENSG00000077279	DCX	79.6565	95.5944	66.853	83.9233	89.2982	89.6272	78.0041	83.0568	99.1142	87.2411	79.4565	106.185	100.828	81.3883	100.125	49.2921	54.9341	62.4226	82.8788	58.3565	63.3301	86.4663	45.2949	75.3279	80.3931	96.0159	89.8157	85.3351	80.5848	84.014
ENSG00000077312	SNRPA	532.043	469.079	549.731	557.491	551.349	563.941	446.573	526.372	381.695	443.745	340.528	414.917	440.246	478.866	420.277	441.643	410.697	430.534	443.926	463.934	458.557	403.509	523.911	518.562	404.027	445.514	405.635	407.6	342.485	333.722
ENSG00000077348	EXOSC5	75.1477	62.2475	74.9838	76.9297	87.2687	95.6696	93.605	100.706	67.482	77.5476	79.4565	86.5541	93.1311	77.6028	67.9859	91.6833	73.2454	92.716	97.1681	79.7539	105.55	83.2638	119.277	122.271	62.8716	53.7689	76.1481	29.1143	27.3989	29.1715
ENSG00000077380	DYNC1I2	271.65	367.716	296.414	332.28	343.023	321.986	368.143	277.156	364.701	397.395	438.022	380.096	358.452	346.366	347.235	404.91	383.823	400.649	351.691	339.327	346.603	317.817	184.992	246.73	464.073	454.306	437.078	678.794	707.984	624.693
ENSG00000077454	LRCH4	71.0597	73.7914	85.1917	104.011	89.8897	74.7316	72.1539	80.6733	80.7754	64.2983	69.8775	83.5839	74.4765	70.6469	69.3848	64.0497	56.5292	80.6895	93.4298	78.781	81.6238	73.1718	96.4438	88.2412	102.046	86.6441	102.269	110.271	85.4904	128.471
ENSG00000077458	FAM76B	212.668	286.783	190.622	244.776	245.57	209.466	104.331	60.2161	196.12	193.869	234.586	158.831	197.038	153.313	201.486	186.324	223.66	139.533	145.752	121.576	92.6496	180.405	40.7654	52.402	214.382	238.119	209.407	220.867	215.162	243.874
ENSG00000077463	SIRT6	34.5679	46.6856	43.8158	40.9626	35.1781	45.3171	43.8773	61.2544	25.3058	45.2361	41.6201	32.1232	46.9504	28.3912	33.3749	44.3629	30.083	41.3091	39.0578	39.877	50.4295	42.6994	55.8637	55.6771	47.4114	35.5259	38.074	56.2208	40.2924	36.1727
ENSG00000077514	POLD3	264.52	344.584	284.577	286.738	280.748	271.903	286.665	284.469	294.18	274.648	280.936	294.462	260.921	259.307	244.749	278.007	299.522	252.445	295.315	292.755	273.258	299.963	247.612	294.761	229.842	279.406	237.231	163.643	161.17	157.526
ENSG00000077522	ACTN2	12.7751	8.8925	8.58248	10.99	13.53	6.04228	16.5759	11.4203	10.5441	16.1557	8.5132	16.0616	11.5452	22.713	12.3611	9.85842	11.7716	9.1798	10.4789	11.6713	10.555	8.53989	22.6475	7.64196	13.3989	13.4422	13.1795	19.0749	13.6994	15.1692
ENSG00000077549	CAPZB	772.516	638.037	836.566	806.264	859.158	827.802	905.823	953.075	770.771	818.156	810.858	834.308	862.808	889.594	799.761	976.971	768.335	959.288	956.02	980.389	920.555	790.623	1135.39	1075.33	826.605	837.26	850.81	926.638	906.388	872.813
ENSG00000077585	GPR137B	33.065	35.57	32.0714	29.9726	28.4131	29.2044	12.6757	22.8406	16.8705	21.541	13.2427	15.1693	18.4723	18.9275	13.5972	18.731	14.3875	17.4416	13.3368	9.72609	8.20946	10.6749	9.05898	6.55025	17.5216	15.3625	14.6439	22.0867	33.8456	26.8378
ENSG00000077616	NAALAD2	42.0827	42.2394	32.5231	24.9772	30.4426	38.2678	26.3264	11.4203	22.1425	22.618	24.5937	24.0924	25.3994	22.713	19.7777	25.6319	26.1591	27.5394	16.1947	26.2604	18.7645	11.7423	4.52949	7.64196	18.5523	17.2829	15.132	19.0749	17.7287	14.0023
ENSG00000077684	JADE1	1270.72	1287.15	1168.44	1057.97	1089.74	1164.96	1325.92	1029.81	1441.31	1206.13	1321.4	1210.79	1266.75	1204.64	1263.21	940.39	1009.74	966.601	869.716	898.604	872.435	642.432	395.576	478.158	373.949	333.122	357.708	280.1	277.201	287.048
ENSG00000077713	SLC25A43	35.3194	55.5781	40.6539	32.9699	45.3256	37.2607	33.1518	44.643	40.0674	28.0033	31.2151	39.2617	39.2536	34.0695	42.0276	30.5611	37.9307	24.7855	23.8157	31.1235	35.1834	25.6197	27.1769	28.3844	49.4727	57.6095	49.7892	37.1459	36.2632	65.3442
ENSG00000077721	UBE2A	247.988	248.99	235.793	259.763	287.513	247.734	357.844	385.176	361.662	350.042	375.526	365.847	374.064	370.033	377.013	430.813	387.154	438.795	423.92	431.838	436.274	429.129	351.791	410.483	471.022	497.362	459.816	441.734	481.091	424.737
ENSG00000077782	FGFR1	1456.36	1613.99	1576.92	1684.46	1692.61	1578.04	1823.35	1860.47	1684.94	1681.28	1623.18	1758.74	1741.78	1623.03	1684.81	1814.94	1896.53	1905.73	2015.76	1995.79	2119.21	1925.74	2397.61	2253.29	1229.6	1255.89	1281.34	672.641	639.843	716.453
ENSG00000077942	FBLN1	396.78	420.171	406.087	524.521	511.435	463.242	529.452	548.175	454.449	402.817	413.363	423.847	441.796	551.738	482.081	412.082	376.691	430.532	461.072	469.77	435.101	455.817	614.502	579.696	618.408	610.66	671.667	1957.68	1848.61	2151.68
ENSG00000078018	MAP2	161.568	113.379	130.544	75.9307	56.1496	94.6625	59.4782	41.5284	60.1012	50.6213	63.376	54.431	49.2594	78.5491	66.7498	28.5894	44.4704	38.5552	22.8631	27.233	32.8378	26.6871	7.54915	14.1922	10.3068	18.243	15.132	500.969	477.869	481.913
ENSG00000078043	PIAS2	220.183	289.006	234.889	221.797	244.894	236.656	221.337	168.19	302.615	263.877	223.235	241.816	281.702	258.36	271.944	326.314	347.916	267.132	228.631	212.029	208.755	229.509	132.865	161.573	178.308	199.713	201.109	143.564	154.723	127.188
ENSG00000078053	AMPH	63.8755	57.8013	61.8842	83.9233	71.0327	63.444	81.9044	74.7511	92.7878	80.7787	72.8351	67.8156	63.8833	69.0854	63.0415	63.0939	73.2455	67.9305	80.9735	61.2743	59.8118	56.5767	40.7654	49.1269	17.5216	24.9641	21.4777	7.0276	5.64094	5.83431
ENSG00000078061	ARAF	54.1063	53.355	62.7876	57.9471	60.8851	61.4299	77.0291	76.8275	53.7747	68.9312	69.9974	59.7848	63.1137	67.1926	81.5831	73.9381	54.9341	96.3879	72.3998	99.2061	84.4402	77.9264	92.0997	103.712	88.6386	94.0956	94.2088	79.3115	93.4784	94.5157
ENSG00000078070	MCCC1	149.544	122.272	124.22	115.894	105.534	115.81	88.7297	98.6299	75.9172	72.1624	97.4288	92.8003	81.5859	78.5491	76.6386	81.8249	66.7057	75.2743	65.7314	67.11	65.6757	64.0491	57.3736	56.7688	78.3318	69.1314	82.0055	213.84	196.627	184.364
ENSG00000078114	NEBL	87.9228	88.925	73.6286	83.9233	69.6797	58.4087	67.2786	28.0317	63.2644	78.6247	82.2942	62.4617	72.3498	67.1926	81.5831	62.108	98.0966	74.3564	86.6892	85.5896	84.4402	157.988	34.7261	39.3015	219.535	191.071	214.289	118.465	149.082	136.523
ENSG00000078124	ACER3	163.822	186.743	163.067	137.874	142.065	155.085	190.135	133.929	226.697	208.948	219.451	207.908	204.734	203.471	197.777	168.579	215.812	145.041	177.189	161.453	171.226	159.055	67.9424	88.4284	238.088	256.362	204.038	324.274	308.64	312.719
ENSG00000078140	UBE2K	1603.64	1911.88	1410.69	1592.55	1610.06	1587.1	1858.44	1255.2	2281.75	2039.95	1968.45	1926.5	1848	1776.34	1959.22	1803.11	2091.42	1743.24	1689.02	1575.63	1754.48	1721.85	735.286	943.235	1662.49	1661.08	1665.96	998.922	993.612	1010.5
ENSG00000078142	PIK3C3	219.431	233.428	198.3	189.827	204.303	197.381	212.561	160.922	224.589	199.254	228.91	218.616	241.679	238.486	197.777	223.786	239.356	208.381	225.773	194.522	179.435	217.767	128.336	156.114	259.732	230.438	222.099	243.958	260.289	239.207
ENSG00000078177	N4BP2	589.157	706.955	501.396	581.469	512.112	517.623	280.815	269.935	653.731	787.325	896.725	616.587	844.335	539.435	796.051	600.377	865.868	431.45	425.825	283.029	327.206	747.243	197.788	198.691	1053.35	1050.41	1167.6	909.575	852.585	866.981
ENSG00000078237	TIGAR	93.954	141.42	95.4579	88.9387	100.706	79.4631	122.901	91.0996	133.512	89.6272	91.3467	92.9454	120.943	84.7448	79.9774	75.9483	65.0896	118.81	119.559	73.2255	75.5943	90.2344	32.9418	75.814	144.21	111.495	109.9	90.7477	112.998	136.444
ENSG00000078246	TULP3	84.1654	100.041	84.018	98.9097	77.7977	77.5426	103.356	99.6681	103.332	118.475	101.212	109.754	97.7492	103.155	98.8886	94.6408	98.0966	101.896	120.031	121.576	112.587	116.356	160.042	151.747	121.62	110.418	120.568	148.584	157.946	168.028
ENSG00000078269	SYNJ2	147.289	133.388	159.905	141.87	138.006	130.916	134.557	121.471	115.985	116.321	122.022	132.062	132.385	122.082	116.194	193.225	234.124	191.858	212.436	194.522	208.755	159.055	175.14	171.398	281.376	263.084	275.304	102.402	109.595	103.851
ENSG00000078295	ADCY2	464.413	404.609	482.879	420.615	452.579	458.206	315.917	330.15	282.581	286.496	295.124	340.863	249.376	313.25	262.055	234.63	265.515	262.543	205.768	212.029	261.53	171.865	244.592	206.333	103.068	84.4939	97.1376	17.067	8.86433	16.3361
ENSG00000078304	PPP2R5C	398.621	417.948	392.231	429.261	458.94	444.646	382.029	300.189	416.407	375.307	384.04	352.545	380.904	380.691	385.103	368.609	358.788	379.763	429.7	386.688	435.629	480.121	208.357	351.53	679.564	702.415	703.236	692.842	684.99	674.986
ENSG00000078319	PMS2P1	70.6436	66.6872	57.771	66.3151	47.2912	52.0061	50.5719	68.187	53.6672	39.5123	46.3496	46.5509	46.887	47.0552	48.4539	46.2469	38.3934	49.3627	56.414	62.937	60.581	55.6447	60.2235	67.9852	19.0812	43.7674	35.6655	49.787	38.5367	30.8094
ENSG00000078328	RBFOX1	9.05325	0	13.0996	10.99	10.1475	10.0705	11.7375	11.4203	10.5441	12.9246	12.2968	11.107	10.0058	6.62462	5.31641	7.90077	13.0795	11.0158	10.5191	8.75348	8.20946	8.53988	8.09716	7.64196	11.338	13.689	7.81182	18.071	18.5345	22.1704
ENSG00000078369	GNB1	1737.45	1611.77	1710.18	1800.34	1817.77	1809.64	1857.47	1935.24	1711.32	1769.61	1563.59	1717.69	1752.53	1719.56	1809.64	1602.01	1654.56	1618.4	1587.09	1690.38	1716.96	1531.85	2008.06	1803.52	1590.32	1668.75	1593.72	1855.27	1861.53	1877.47
ENSG00000078401	EDN1	0.751477	0	1.35513	0.999087	0.676502	1.00705	0.975052	1.03821	0	0	3.78364	0	0.769679	3.7855	1.23611	1.97168	1.30795	0.91798	0.952629	0	0	0	0	0	25.767	16.3227	17.0845	13.0513	20.1462	10.5017
ENSG00000078403	MLLT10	353.946	340.138	352.333	349.68	334.191	355.488	256.439	247.094	239.35	289.727	273.368	255.201	249.376	278.234	283.068	249.418	328.297	296.508	343.899	303.454	308.441	277.546	160.042	231.442	360.738	287.087	311.427	335.317	320.728	312.719
ENSG00000078549	ADCYAP1R1	137.52	120.049	126.478	130.88	111.623	110.775	132.607	169.228	120.202	99.0886	115.401	105.293	91.5918	108.833	113.722	198.154	175.266	220.315	163.852	169.234	166.535	122.761	155.513	174.673	16.4909	17.2829	21.9658	2.00789	1.6117	0
ENSG00000078596	ITM2A	74.3961	133.388	78.5975	107.901	123.8	100.705	170.634	139.12	175.031	150.787	140.941	123.139	130.845	127.76	143.388	144.919	134.719	134.943	156.231	118.658	173.571	165.46	129.845	177.949	127.805	128.661	137.652	55.2168	55.6036	56.0093
ENSG00000078618	NRDC	1199.73	1082.58	1188.79	1114.77	1176.08	1185.01	1315.94	1188.45	1217.72	1224.24	1323.94	1256.56	1187.96	1234.85	1222.02	1131.08	1174.38	1158.28	1286.11	1326.09	1301.28	1252.05	958.439	1239.64	1384.21	1292.95	1357.54	1159.3	1175.14	1168.75
ENSG00000078668	VDAC3	333.656	300.122	329.738	362.669	378.841	346.424	424.148	516.973	422.191	427.589	482.414	473.778	447.183	430.6	480.845	490.949	419.853	481.021	462.977	487.246	521.887	445.141	492.148	495.636	447.316	451.275	436.387	389.529	447.228	439.906
ENSG00000078674	PCM1	1248.96	1151.58	1075.98	1022.07	943.721	1101.71	438.773	272.011	801.349	930.573	1055.64	876.248	1006.74	794.955	1006.19	818.248	969.192	720.614	775.44	608.853	487.876	991.694	271.769	269.652	965.748	982.243	954.291	961.777	1042.77	1036.17
ENSG00000078687	TNRC6C	199.785	173.548	169.188	164.439	186.155	191.38	111.856	148.502	113.209	98.0877	81.146	113.793	102.018	137.538	102.463	49.5672	53.2796	65.6853	75.5243	83.6296	98.7494	75.0425	78.5198	81.0079	103.334	110.629	107.328	112.331	108.083	111.483
ENSG00000078699	CBFA2T2	113.473	135.611	120.607	137.874	113.652	123.867	90.6799	92.4006	79.0805	73.2394	68.1056	90.1234	61.5743	80.4418	75.4026	76.8957	61.4739	73.4384	101.931	72.9456	79.749	99.2762	93.6095	110.262	138.111	142.103	147.415	252.993	224.026	238.04
ENSG00000078725	BRINP1	88.6743	117.826	109.765	153.859	130.565	154.078	186.235	191.031	181.358	190.638	182.561	186.493	186.262	176.972	158.222	194.211	155.647	169.826	265.784	241.207	254.493	296.761	380.477	350.438	57.7182	74.8924	60.5279	52.205	49.9626	52.5087
ENSG00000078747	ITCH	281.052	300.015	260.64	271.752	261.143	252.769	299.341	222.19	360.607	286.495	324.458	285.64	301.715	295.321	321.029	337.178	320.45	310.277	314.372	285.957	321.342	321.316	143.489	210.712	364.862	361.019	383.67	453.783	439.205	419.039
ENSG00000078804	TP53INP2	34.5679	28.9006	33.8782	26.9754	31.1191	45.3171	30.2266	26.9934	25.3058	19.3869	18.9182	20.5231	20.7813	25.5521	21.0138	20.7027	17.0034	30.2933	21.9105	16.5343	24.6284	10.6749	12.0786	13.1005	24.7363	22.0836	25.8708	60.2365	71.7205	77.0128
ENSG00000078808	SDF4	200.644	202.304	230.372	232.787	218.51	220.543	257.414	275.125	229.861	233.72	287.557	250.739	252.455	267.824	241.041	300.682	294.29	303.851	272.452	310.262	330.724	244.454	291.398	349.347	307.143	295.729	298.734	317.246	282.047	304.551
ENSG00000078900	TP73	11.4333	11.1156	9.86268	12.4265	9.57671	12.357	18.3482	17.8433	13.3007	4.3082	15.1186	9.49822	9.08255	12.9449	4.09728	5.27139	7.84773	9.34376	5.06742	7.0585	10.735	7.61112	13.9971	10.9316	11.3358	7.68972	11.512	12.4956	13.2482	8.72718
ENSG00000078902	TOLLIP	71.3903	75.5863	60.0774	65.9398	64.9441	51.3594	100.43	105.897	88.5702	80.7787	78.5106	86.5541	83.1253	92.7448	106.305	100.556	75.8613	123.927	110.505	118.658	134.87	104.614	132.865	116.813	135.019	115.219	141.069	129.509	137.8	157.526
ENSG00000078967	UBE2D4	33.6101	17.785	29.0353	20.9808	29.1262	31.2185	23.3291	15.6497	17.9249	19.3869	20.7446	14.752	19.8581	24.3307	19.4067	20.5083	14.0469	23.7577	24.6234	22.246	19.5145	19.07	20.8114	23.2837	18.3593	13.6002	11.0956	14.5947	19.2519	12.6763
ENSG00000079102	RUNX1T1	143.532	106.71	143.192	122.888	129.888	110.775	80.9293	64.369	101.223	86.164	81.3483	83.8772	90.8221	81.3882	76.6386	92.6691	105.944	78.0283	120.984	109.905	134.87	131.301	70.962	94.9786	124.712	107.538	122.52	147.58	145.053	145.858
ENSG00000079134	THOC1	284.058	300.122	271.695	247.774	249.629	256.797	253.898	141.196	313.159	358.658	353.771	306.955	358.671	293.376	389.374	333.215	354.456	319.457	232.441	252.878	219.31	303.166	75.4915	102.621	314.358	323.574	340.226	229.903	197.433	211.202
ENSG00000079150	FKBP7	30.8105	44.4625	31.168	37.9653	41.2666	34.2396	33.1518	18.6878	26.3602	20.4639	27.4314	24.0924	33.0962	28.3912	22.2499	18.731	24.8511	15.6057	20.0052	15.5617	14.0734	23.4847	3.01966	13.1005	31.9511	27.8446	22.4539	32.1262	41.0983	28.0047
ENSG00000079156	OSBPL6	130.005	122.272	129.189	91.916	126.506	127.895	44.8524	45.6812	61.1556	58.1607	44.4578	44.6155	43.102	47.3188	38.3193	54.2213	41.8545	44.063	57.1578	58.3565	59.8118	73.6565	61.903	72.0528	61.8409	78.733	57.5992	23.0907	22.5638	14.0023
ENSG00000079215	SLC1A3	245.733	240.097	192.88	229.79	242.188	212.471	171.609	171.305	185.576	148.633	132.427	157.047	119.3	159.937	129.791	82.8107	71.9375	58.7507	58.1104	68.0826	62.1573	70.454	66.4325	51.3103	72.1477	62.4103	63.9448	316.242	301.298	318.553
ENSG00000079246	XRCC5	3842.32	4061.63	3808.96	4062.19	4063.72	3823.79	5093.66	5248.12	4817.47	4960.83	5206.24	4916.64	4663.3	4590.78	4724.3	4839.4	4600.18	4903.73	4844.07	5071.15	5075.94	4817.6	5304.06	5439.94	4607.14	4777.96	4532.89	3551.01	3581.24	3554.26
ENSG00000079257	LXN	20.2899	28.9006	20.3269	25.9763	25.0306	29.2044	28.2765	18.6878	24.2513	29.0803	32.161	27.6616	20.7813	17.0347	29.6666	31.5469	34.0068	22.0315	24.7684	33.0687	25.8012	26.6871	21.1376	10.9171	37.1045	46.0876	38.074	30.1183	37.8749	31.5052
ENSG00000079277	MKNK1	59.3667	51.1319	49.6881	57.9471	58.1791	62.4369	44.8524	37.3755	31.6322	34.4656	45.4037	41.9386	32.3265	41.6405	30.9027	27.6036	24.8511	29.3754	43.8209	48.6304	41.0473	53.3743	40.7654	58.9522	32.9818	38.4063	39.5384	60.2366	57.2153	86.3477
ENSG00000079308	TNS1	57.8637	51.1319	57.3671	57.9471	53.4436	61.4299	27.3015	31.1463	30.5778	29.0803	28.3773	33.0155	30.0175	36.9086	13.5972	52.2496	74.5534	59.6687	68.5893	49.603	58.639	50.1718	86.0603	68.7776	66.9943	51.8486	67.3617	36.1419	31.4281	46.6744
ENSG00000079313	REXO1	114.911	117.826	138.168	133.76	131.206	113.796	165.689	183.763	137.073	153.953	125.758	163.293	176.205	176.026	171.753	145.64	184.206	163.182	170.449	135.001	181.781	171.837	232.394	190.99	159.923	169.896	195.691	154.514	132.946	166.696
ENSG00000079332	SAR1A	506.495	569.12	495.963	548.498	583.142	497.44	730.318	797.346	804.508	746.395	740.646	726.34	695.018	739.12	684.802	713.708	720.645	664.564	664.927	636.085	681.378	651.132	537.5	626.641	684.371	700.908	716.082	981.84	942.036	864.627
ENSG00000079335	CDC14A	77.3527	108.933	73.6287	87.9197	79.7878	82.5779	70.9859	42.5666	84.3525	58.1607	78.5106	66.9233	67.7317	56.7825	62.8891	62.108	49.7023	58.7507	60.9683	51.5483	46.9112	53.3743	27.1769	42.5766	84.5159	68.1713	87.2646	88.347	87.0317	85.1809
ENSG00000079337	RAPGEF3	30.0594	26.6775	31.4493	30.2442	34.5016	26.1832	12.6757	17.6496	16.8705	18.3098	17.5566	18.7385	19.2328	22.713	19.7777	21.06	23.5432	24.7855	29.5315	23.3426	21.11	10.0181	19.6285	28.3844	5.15341	13.4422	14.1557	9.03549	3.22339	5.83431
ENSG00000079387	SENP1	222.431	204.528	209.141	193.823	197.533	199.395	218.412	167.152	192.956	170.174	192.02	211.477	188.571	187.382	197.777	165.621	213.197	191.858	201.005	206.193	236.902	238.049	149.473	179.04	304.051	245.801	271.887	234.923	210.326	243.874
ENSG00000079432	CIC	107.461	113.379	124.672	117.892	111.623	106.747	152.108	187.916	136.018	169.097	121.077	165.077	167.02	171.294	171.819	154.777	171.342	167.072	207.673	201.33	191.163	169.73	215.906	175.765	194.799	149.785	188.906	207.816	203.074	219.37
ENSG00000079435	LIPE	22.5443	42.2394	37.4919	37.9653	26.9459	37.2607	15.6008	35.2991	30.5778	26.9262	25.5396	29.4462	23.0904	26.4985	21.0138	28.5894	23.5432	22.6569	28.5789	32.0961	22.2828	11.7423	30.1966	13.1005	11.3375	11.0657	12.2032	7.0276	4.83509	8.16803
ENSG00000079459	FDFT1	665.057	802.548	932.779	1190.91	1123.67	841.89	1721.94	1829.32	1471.96	1555.26	1521.97	1577.61	1613.24	1538.81	1594.58	2000.27	1675.48	1975.49	2256.78	2294.38	2464.01	1873.44	2436.86	2128.82	1650.12	1565.05	1588.86	1645.46	1608.47	1780.63
ENSG00000079462	PAFAH1B3	148.298	195.635	177.781	171.666	138.326	156.88	196.65	238.992	203.496	174.984	189.349	225.463	188.968	212.351	183.961	226.965	222.11	229.046	213.969	185.536	189.406	173.505	224.726	221.133	147.226	156.072	145.49	157.618	120.825	127.186
ENSG00000079482	OPHN1	54.1063	48.9088	57.8188	36.9662	48.7081	50.3524	45.8275	33.2227	31.6322	44.159	27.4314	32.1232	33.0962	60.568	46.9721	31.5469	24.8511	35.8012	32.3894	39.877	31.6651	27.7546	27.1769	33.843	45.35	33.6055	42.4672	249.982	244.978	236.873
ENSG00000079616	KIF22	472.67	420.169	480.573	488.553	507.376	505.534	493.76	491.207	422.817	512.338	477.383	476.778	442.401	503.139	471.044	536.295	483.943	567.281	570.349	545.506	589.908	464.052	597.893	599.31	491.527	504.573	500.82	485.888	465.16	458.354
ENSG00000079691	CARMIL1	239.721	271.221	248.892	251.77	204.303	229.607	297.391	253.323	245.677	234.797	252.558	248.954	229.365	259.307	265.763	189.282	201.425	212.971	215.294	215.919	206.409	212.43	231.004	227.076	365.892	335.095	361.704	264.037	244.172	259.043
ENSG00000079739	PGM1	158.562	151.173	194.687	326.701	325.396	269.889	189.16	250.209	194.011	163.712	167.426	178.462	170.869	165.616	181.708	187.31	128.179	167.072	157.184	156.59	163.016	107.816	170.611	137.555	135.019	102.737	130.818	107.422	109.595	136.523
ENSG00000079785	DDX1	985.187	1000.41	977.498	884.192	887.571	948.639	960.426	686.257	963.728	1005.96	1045.23	1038.65	1012.13	937.858	1077.89	1061.75	973.118	1051.09	1034.56	1075.71	1056.68	936.183	472.577	656.117	905.968	892.947	904.989	732.878	742.992	806.301
ENSG00000079805	DNM2	517.93	463.921	514.293	472.966	496.51	537.074	434.357	517.491	417.551	410.537	399.867	423.359	436.153	439.085	412.956	407.866	431.66	434.549	416.851	489.907	440.437	482.659	579.167	562.363	424.433	469.9	465.116	497.369	496.884	557.451
ENSG00000079819	EPB41L2	810.095	786.985	731.317	875.199	869.302	922.455	750.79	769.314	776.042	682.849	698.083	733.479	691.941	735.332	671.207	668.4	702.372	552.624	606.825	570.921	653.238	551.89	557.128	622.273	651.392	633.705	601.861	570.24	525.414	612.603
ENSG00000079841	RIMS1	15.781	20.0081	13.5513	13.9872	10.824	14.0987	15.6008	9.34389	21.0881	16.1557	10.405	15.1693	12.3149	12.3029	9.88886	13.8018	7.84773	11.9337	11.4315	11.6713	10.555	11.7423	6.03932	7.64196	23.7057	33.6055	20.9895	14.0552	12.0877	9.33489
ENSG00000079931	MOXD1	59.3666	55.5781	39.2987	43.9598	42.6196	49.3453	29.2516	17.6496	32.6866	17.2328	32.161	17.8462	15.3936	20.8202	18.5416	18.731	27.467	16.5236	13.3368	12.6439	11.7278	12.8098	9.05898	19.6507	7.21477	13.4422	11.227	9.03549	8.86433	17.5029
ENSG00000079950	STX7	295.33	333.469	283.222	288.736	316.603	268.882	222.312	178.572	256.221	256.338	263.909	232.893	248.606	254.575	245.985	244.489	251.127	226.741	233.394	233.426	224.001	265.804	126.826	155.023	309.204	257.322	327.046	492.936	466.586	436.406
ENSG00000079974	RABL2B	53.4532	41.6752	60.3563	60.8667	45.3878	48.0246	72.4425	80.2984	64.3555	67.8951	55.5975	61.014	69.8141	48.2691	55.0206	73.7786	75.3533	77.442	58.5054	60.8662	62.6511	63.0752	78.0208	54.8424	67.7478	67.2633	59.4377	92.1255	70.502	93.5489
ENSG00000079999	KEAP1	175.846	175.627	192.428	225.794	173.184	178.247	251.563	330.151	265.71	284.341	292.286	295.355	322.495	331.231	302.847	294.767	315.217	324.047	337.231	359.865	368.253	301.031	378.968	330.788	312.296	316.853	325.093	119.469	124.101	119.02
ENSG00000080189	SLC35C2	100.698	86.7019	94.859	103.905	81.1802	104.733	102.38	113.165	74.8629	124.938	104.05	96.3695	108.525	103.155	112.486	118.301	113.792	98.2239	125.747	140.056	134.87	112.086	134.375	133.188	86.5772	116.179	115.686	116.457	118.46	112.019
ENSG00000080200	CRYBG3	197.292	236.108	217.628	197.216	192.254	214.083	116.431	54.0185	193.245	206.327	225.764	213.608	217.101	168.999	196.581	141.366	175.377	116.307	157.148	103.812	82.3245	132.478	47.0049	47.4251	249.632	189.692	218.044	120.872	97.7174	157.027
ENSG00000080298	RFX3	151.047	168.957	113.831	155.858	136.653	144.008	145.283	105.897	204.555	186.33	190.128	149.908	163.942	132.493	152.041	85.7683	82.4011	69.7665	175.284	142.001	152.461	226.307	60.3932	98.2538	146.357	152.665	184.513	206.812	249.813	218.203
ENSG00000080345	RIF1	1557.07	1891.88	1443.68	1318.8	1410.5	1400.8	638.659	508.723	1256.85	1657.58	2011.95	1304.97	1854.15	1045.75	1805.94	1247.09	2086.21	1036.4	718.282	533.962	465.594	1394.13	386.517	386.465	1392.45	1410.47	1442.91	939.689	1004.09	963.826
ENSG00000080371	RAB21	329.898	404.609	299.032	310.716	332.839	308.157	274.965	227.368	325.812	309.113	329.177	294.462	317.877	328.392	327.569	308.569	372.767	316.703	274.357	282.056	266.221	292.491	128.336	160.481	329.818	284.207	294.342	340.337	327.98	348.891
ENSG00000080493	SLC4A4	15.0295	20.0081	15.8098	11.989	16.236	13.0916	12.6757	6.22926	11.5985	21.541	29.3232	18.7385	18.4723	9.46375	12.3611	12.8159	13.0795	11.9337	9.52629	12.6439	12.9006	10.6749	4.52949	3.27512	4.12273	9.60158	4.39316	3.01183	0.805849	0
ENSG00000080503	SMARCA2	129.254	106.71	95.3098	99.2062	114.329	137.965	35.1019	24.917	33.5219	61.3918	62.4301	66.031	55.1495	166.562	56.8609	73.9381	58.8579	76.1923	70.4946	73.9183	64.5029	62.9817	58.8834	69.8693	323.634	307.251	304.592	1602.29	1595.58	1599.77
ENSG00000080546	SESN1	175.932	175.626	140.885	185.83	178.616	148.036	188.185	176.495	216.153	168.02	180.669	179.354	160.093	134.385	185.009	192.239	179.19	170.744	189.573	178.96	202.891	159.501	123.806	155.917	124.713	87.1485	112.358	142.56	120.071	106.253
ENSG00000080561	MID2	39.8283	15.5619	28.006	37.9653	31.7956	40.2819	21.4511	14.5349	28.469	20.4639	19.8641	19.6308	12.3149	15.142	13.5972	28.5894	23.5432	27.5394	21.9105	24.3152	28.1467	25.6197	24.1573	27.2927	66.9943	47.0478	60.5279	63.2484	75.7498	63.0105
ENSG00000080603	SRCAP	192.369	264.28	255.861	265.21	256.393	211.244	340.448	411.069	312.828	224.024	324.417	344.957	320.299	371.223	415.599	317.766	355.706	273.295	373.58	398.868	447.824	348.626	414.635	427.627	466.755	431.417	446.616	328.94	285.755	381.686
ENSG00000080608	PUM3	423.082	417.948	426.412	376.656	391.694	401.812	300.316	196.222	415.436	442.668	503.202	410.463	456.419	406.941	433.873	429.825	457.784	455.318	322.941	353.057	303.75	416.319	99.6488	139.739	317.45	347.577	314.843	211.832	178.898	220.537
ENSG00000080644	CHRNA3	39.8283	42.2394	40.6539	34.9681	36.5311	36.2537	27.3015	42.5991	29.5234	26.9262	7.56729	23.2001	16.9329	25.5521	19.7777	25.6319	24.881	23.8675	13.3368	23.3426	19.9373	16.0123	21.1376	12.0088	12.3682	19.2032	16.1082	2.00789	0.805849	1.16686
ENSG00000080709	KCNN2	63.124	68.9169	70.015	82.9243	66.9737	67.4722	103.356	121.47	101.223	105.551	118.239	112.431	111.603	119.243	107.541	118.301	156.955	128.517	40.0104	54.4661	46.9112	21.3497	34.7261	20.7425	14.4295	17.2829	9.76257	70.276	95.0901	116.686
ENSG00000080802	CNOT4	117.982	140.057	124.22	130.88	144.095	159.113	110.181	122.509	151.835	147.556	133.373	119.57	130.845	132.492	128.555	129.145	164.802	129.435	138.131	145.891	121.969	135.571	96.6291	112.446	130.897	146.904	126.913	161.635	123.295	124.854
ENSG00000080815	PSEN1	329.898	293.453	350.527	335.693	315.25	328.298	280.815	323.921	267.819	282.187	254.45	310.524	302.484	264.039	295.43	239.56	247.203	273.558	232.441	249.96	265.048	269.007	353.3	375.548	310.235	310.131	303.128	344.353	356.991	372.229
ENSG00000080819	CPOX	137.52	193.412	145.451	204.813	191.45	135.951	239.863	226.33	280.472	193.869	211.884	197.201	192.42	194.007	184.18	231.673	255.051	201.956	192.431	209.111	214.619	212.43	184.199	192.141	220.566	201.633	208.919	170.67	160.364	166.861
ENSG00000080822	CLDND1	276.543	369.039	272.381	352.678	338.251	303.122	398.796	278.24	423.871	388.816	391.607	333.144	367.136	300.001	364.651	341.101	385.847	317.622	344.852	345.464	388.19	385.362	176.65	250.001	520.516	474.317	462.747	531.085	496.402	500.587
ENSG00000080823	MOK	10.5207	6.66938	11.2927	5.99452	9.47102	7.04933	4.87526	7.26747	3.16322	6.4623	0.945911	4.46155	3.84839	7.571	3.70832	4.92921	9.15568	2.75394	6.6684	3.89043	5.8639	4.26994	3.01966	5.45854	29.8898	41.2868	35.6334	18.071	12.0877	9.33489
ENSG00000080824	HSP90AA1	7545.09	8757.7	7994.22	8181.92	7927.87	7588.1	9215.82	4039.7	11772.4	11232	12277.8	11102.2	10811.4	10391.6	9676.23	10559.4	11396.6	11597.2	10736.1	11035.6	9967.52	11204.1	2661.16	3586.24	13536.8	13763.5	13675.2	10562.4	10787.3	10218.4
ENSG00000080839	RBL1	123.201	146.726	119.541	121.82	136.639	130.916	131.632	76.7195	135.897	132.441	151.297	117.785	132.347	108.833	150.72	119.287	130.795	110.158	129.303	147.605	86.7857	109.951	39.2556	50.1289	129.866	132.412	127.521	64.2523	81.3907	72.3454
ENSG00000080845	DLGAP4	139.743	128.941	163.182	154.858	145.98	149.991	156.528	182.362	136.018	180.944	133.297	151.693	138.036	211.042	133.5	136.046	151.723	154.221	153.373	160.48	161.844	188.945	242.874	180.132	312.297	254.592	332.075	722.68	720.499	702.754
ENSG00000080854	IGSF9B	451.637	353.477	422.349	397.637	349.751	367.572	374.42	392.443	378.532	311.267	319.718	348.893	324.035	335.963	311.499	256.319	278.594	264.378	258.162	252.878	248.629	208.16	283.848	227.075	117.498	115.219	120.568	50.1971	54.7977	32.6721
ENSG00000080947	CROCCP3	22.3048	34.0025	15.9257	24.1634	22.5602	19.4045	31.009	19.6467	30.2193	25.8492	17.5596	19.4768	28.8793	17.7537	24.1939	7.88673	19.831	18.2449	17.1473	22.37	24.6284	23.4847	19.6719	15.9028	25.3159	19.13	17.6626	35.9378	26.7961	33.491
ENSG00000080986	NDC80	388.513	380.154	337.427	313.713	305.102	389.727	211.586	103.821	208.772	232.643	245.937	229.324	221.667	235.647	233.624	202.098	215.812	215.725	248.636	244.125	245.111	255.129	77.0013	99.3454	233.965	244.84	225.027	211.832	210.326	241.54
ENSG00000081014	AP4E1	193.881	200.081	171.198	153.859	171.831	171.198	122.857	66.4454	158.161	136.785	142.833	142.77	143.16	146.688	138.444	130.131	147.799	119.337	105.742	118.658	110.241	141.976	40.7654	54.5854	227.781	217.956	237.719	235.926	217.579	250.875
ENSG00000081019	RSBN1	139.775	184.519	125.575	141.87	140.712	128.902	159.909	93.4389	162.379	141.094	142.833	126.708	159.323	155.205	173.055	169.565	163.494	178.088	176.236	166.316	144.252	154.785	83.0407	91.7035	184.492	167.068	163.035	211.832	199.851	196.033
ENSG00000081026	MAGI3	69.1359	86.7019	76.7906	71.9343	71.7091	77.5426	75.0791	56.0633	79.0805	81.8558	79.4565	73.1695	98.5188	171.294	95.1803	72.9523	94.1727	100.978	146.705	128.384	109.069	135.571	58.8834	72.0527	170.062	165.148	171.822	1502.91	1398.94	1369.9
ENSG00000081052	COL4A4	12.7751	17.785	14.4547	20.9808	12.8535	17.1198	6.82536	9.34389	5.27203	11.8475	10.405	6.24617	9.23614	8.51738	13.5972	4.92921	5.23182	5.50788	20.9578	16.5343	14.0734	17.0798	15.0983	9.82537	2.06136	5.76095	4.88129	5.01971	11.2819	5.83431
ENSG00000081059	TCF7	32.3135	42.2394	39.2988	54.9498	48.7081	46.3242	40.9522	44.643	55.8836	31.2345	35.9446	30.3386	59.2653	55.8361	48.2082	89.7116	94.1727	81.7002	80.9735	78.7813	78.5763	141.976	138.904	151.747	199.952	244.84	236.254	53.209	43.5158	44.3407
ENSG00000081087	OSTM1	298.336	353.477	248.44	245.775	250.305	226.586	208.661	110.05	316.323	291.881	311.204	235.57	270.157	241.326	275.651	223.786	192.269	172.58	152.421	134.22	107.896	144.111	46.8047	49.1269	163.878	162.267	181.584	269.057	277.212	283.547
ENSG00000081138	CDH7	15.0295	22.2313	11.7445	9.99087	14.2065	6.04228	9.75052	3.11463	7.38085	6.4623	7.56729	6.24617	4.61807	20.8202	6.18054	5.91505	5.23182	4.5899	5.71577	6.80826	4.69112	3.20246	1.50983	2.18342	203.044	170.908	185.977	119.469	133.771	102.684
ENSG00000081154	PCNP	1417.22	1645.12	1171.44	1448.41	1350.34	1228.01	1101.07	729.715	1529.24	1472.09	1457.35	1270.55	1346.67	1162.81	1474.27	1446.41	1541.73	1348.11	1065.54	932.344	877.874	1400.43	464.054	572.465	1470.59	1379.41	1471.36	1175.2	1227.13	1174.23
ENSG00000081177	EXD2	205.905	197.858	212.755	154.859	180.626	191.339	172.584	161.961	141.291	170.174	149.299	151.693	163.172	153.313	137.208	107.457	145.183	121.173	149.563	188.686	143.079	162.258	193.258	189.957	125.743	148.825	133.259	181.714	182.122	239.207
ENSG00000081181	ARG2	319.4	291.622	305.624	320.565	282.305	342.928	312.271	354.212	304.304	250.567	287.387	263.2	261.766	241.105	273.986	277.265	209.998	223.137	213.358	184.479	183.973	171.49	166.223	164.239	215.732	118.444	174.998	99.3673	124.827	127.5
ENSG00000081189	MEF2C	8.26624	2.22312	9.93761	8.99179	6.36557	5.03524	7.80042	1.03821	5.27203	2.1541	0.945911	1.78462	3.07871	4.73187	1.23611	0.985842	0	0	0	0.972609	1.17278	1.06749	0	0	1.03068	2.88048	0	7.0276	1.6117	2.33372
ENSG00000081307	UBA5	423.649	497.98	354.151	384.799	391.018	348.572	278.865	204.527	373.26	355.236	413.363	332.832	353.253	306.625	377.838	390.393	414.622	335.062	313.415	292.697	281.095	316.943	105.688	168.123	297.867	308.211	343.583	392.542	353.639	325.004
ENSG00000081320	STK17B	52.6034	66.6938	49.6881	64.9407	61.5616	49.3453	73.1289	42.5666	91.7334	56.0066	58.6465	61.5694	84.6646	75.71	81.5831	84.7824	86.325	88.1261	77.163	67.11	94.9952	91.8038	31.7064	41.4849	105.13	101.777	118.615	86.3391	87.8375	77.0128
ENSG00000081377	CDC14B	529.233	606.99	531.438	844.351	819.565	744.883	746.15	694.339	719.146	731.744	697.343	738.692	711.043	688.132	775.25	853.11	977.286	917.737	1000.28	950.501	982.81	863.68	611.219	788.317	689.762	727.93	710.919	623.139	574.019	598.004
ENSG00000081386	ZNF510	142.029	220.089	137.772	133.878	128.535	150.05	93.605	58.1397	123.366	131.4	123.914	98.1542	125.458	114.511	126.083	99.57	111.176	81.7002	99.0733	74.8909	62.1573	108.884	33.2163	52.402	112.344	100.817	106.9	126.497	136.994	113.186
ENSG00000081479	LRP2	24.0473	20.0081	18.5201	9.99087	6.76502	6.04228	16.5759	9.34389	7.38085	5.38525	3.78364	10.7077	7.69679	70.9781	4.94443	7.88673	7.84773	4.5899	2.85789	8.75348	4.69112	4.26994	3.01966	1.09171	43.2886	24.9641	45.8841	792.111	787.314	947.491
ENSG00000081665	ZNF506	62.3726	57.8013	57.0457	61.9434	62.345	70.4933	35.1019	32.1845	61.1556	43.082	79.4565	49.0771	69.2711	47.8565	77.8747	58.2723	79.7852	53.2428	53.3472	57.3839	60.9846	62.9817	28.3694	29.4761	74.8768	72.9721	74.9373	95.3746	95.0901	107.351
ENSG00000081692	JMJD4	39.0549	26.4491	46.1442	49.4484	49.2312	46.0362	46.5586	66.4604	58.7067	49.6118	56.9451	51.8233	65.2965	48.1322	44.8943	60.8536	62.4141	65.9955	77.9285	71.7472	67.6603	73.3788	72.2294	79.1165	65.9851	76.553	41.9855	55.7828	65.3264	90.2951
ENSG00000081721	DUSP12	162.319	108.933	144.547	134.877	147.477	172.205	95.5552	115.241	120.202	112.013	125.806	124.031	123.918	116.404	114.958	132.103	107.252	135.861	123.842	117.686	113.76	136.638	107.198	124.455	122.651	136.343	110.805	88.347	79.779	88.6814
ENSG00000081760	AACS	160.816	144.503	173.908	179.836	183.332	162.135	201.836	262.667	189.793	194.946	209.046	207.909	186.262	226.183	210.138	229.701	224.968	234.085	225.773	245.097	280.295	209.227	291.397	254.368	154.602	164.187	177.191	126.497	122.489	150.525
ENSG00000081791	DELE1	172.84	164.511	172.101	199.817	167.096	195.367	156.008	176.496	153.943	161.557	157.021	149.908	166.251	194.007	168.111	156.749	145.183	155.139	187.668	174.097	165.362	132.368	182.689	174.673	143.265	167.068	156.689	193.761	181.316	192.532
ENSG00000081803	CADPS2	84.9169	124.495	116.993	86.9206	100.122	86.6061	179.41	155.732	153.943	229.412	217.559	228.432	194.729	177.918	210.138	162.664	168.726	175.334	156.231	164.371	163.016	223.104	131.355	162.665	226.75	270.764	269.935	197.777	179.704	189.031
ENSG00000081870	HSPB11	92.4317	62.2475	69.5633	82.9242	76.4447	69.4863	85.8046	77.8657	92.7878	71.0853	83.2402	72.2771	66.962	65.2999	71.6942	77.8815	64.0898	67.0125	61.9209	74.8909	56.2934	69.3866	46.8047	62.2274	53.5955	61.4501	69.8024	72.2839	74.138	58.3431
ENSG00000081913	PHLPP1	365.969	382.378	401.118	314.713	345.016	363.544	441.699	451.621	410.164	354.349	367.013	379.232	360.21	369.086	369.596	431.799	459.092	430.533	571.577	619.552	656.757	554.025	890.8	710.702	416.395	431.111	430.041	218.86	229.667	243.874
ENSG00000081923	ATP8B1	15.781	28.9006	13.0935	23.5488	26.3836	29.2044	39.9771	16.6114	33.741	29.8937	29.3232	32.1232	31.9231	38.7117	35.229	37.3583	44.1882	44.981	43.424	31.1235	28.9939	34.0597	22.2205	20.7425	52.3489	47.8603	49.5038	118.419	114.431	99.1435
ENSG00000081985	IL12RB2	12.7751	11.1156	10.3893	21.9799	20.9716	19.1339	15.6008	8.30568	16.8705	16.1558	13.2428	16.0616	10.7755	10.4101	12.3611	3.94337	6.53977	9.1798	7.62103	9.72609	7.03668	5.33743	6.03932	3.27512	13.3989	18.243	16.5964	0	2.41755	2.33372
ENSG00000082014	SMARCD3	15.2472	24.4544	28.006	25.9763	22.5202	33.7777	11.7006	16.3355	20.0337	18.2644	8.02703	14.45	12.0501	13.2492	11.125	17.7452	15.6961	13.0912	16.6839	27.233	16.6235	19.2147	24.1573	27.2927	39.1659	28.8048	33.1927	14.4316	11.9311	19.1774
ENSG00000082068	WDR70	125.497	113.379	131.899	134.877	127.828	128.902	140.407	157.808	131.596	121.707	142.832	121.027	130.076	94.3762	139.68	115.113	113.792	129.435	131.463	142.001	145.425	129.136	154.003	135.372	119.558	125.781	112.602	139.548	134.577	142.357
ENSG00000082146	STRADB	229.834	212.347	200.663	194.888	217.899	199.196	217.868	240.548	222.855	207.803	191.43	186.448	197.322	203.752	210.558	192.755	170.63	196.087	154.62	176.518	172.251	208.55	172.931	193.147	164.57	190.819	189.011	268	262.302	227.113
ENSG00000082153	BZW1	1064.49	1336.88	1015.27	1125.63	1150.22	987.55	2055.1	1165.52	2613.8	2584.14	2749.42	2366.94	2493.19	2353.81	2679.08	2608.8	2654.11	2541.89	2251.54	2243.12	1999.61	2477.62	646.135	972.7	2342.34	2459.94	2208.01	1775.2	1775.39	1760.58
ENSG00000082212	ME2	523.779	531.327	435.433	512.532	456.638	482.352	556.754	482.767	535.638	488.981	492.82	439.909	464.886	448.582	469.721	422.926	440.781	456.236	315.297	310.262	323.687	262.601	143.434	198.691	171.093	162.241	179.631	195.769	187.763	196.003
ENSG00000082213	C5orf22	299.088	302.345	302.194	264.758	302.397	296.072	235.963	186.878	257.275	229.412	248.774	261.447	227.825	260.253	291.722	217.871	239.356	271.722	236.252	223.7	227.52	230.577	99.6488	146.289	223.658	234.278	209.895	189.745	208.715	213.536
ENSG00000082258	CCNT2	755.236	853.68	679.826	744.089	703.56	711.983	446.575	226.329	635.809	622.535	691.462	627.294	704.256	627.446	672.444	699.946	846.243	628.816	583.962	466.852	449.175	586.05	154.003	191.049	647.268	626.985	628.711	672.642	680.134	641.774
ENSG00000082269	FAM135A	387.011	460.187	348.268	327.701	376.135	386.706	235.963	114.203	463.939	366.197	422.822	355.14	364.828	301.894	375.777	223.786	319.141	176.252	282.931	195.494	193.509	375.755	104.178	99.3455	375.168	385.983	350.476	222.875	236.92	254.376
ENSG00000082293	COL19A1	0	0	0.903419	0	0.676502	0	0	1.03821	1.05441	0	0	0	0	5.67825	0	0	0	0	0	1.94522	0	2.13497	0	0	2.06136	1.92032	1.95251	43.1695	29.0105	32.6721
ENSG00000082397	EPB41L3	223.188	197.858	191.525	223.796	223.245	233.635	144.308	122.509	147.617	135.708	165.534	124.923	126.227	219.559	142.152	214.913	234.124	230.413	401.056	393.906	437.447	580.713	409.164	567.688	1030.68	1038.89	1049.97	1378.41	1300.64	1443.41
ENSG00000082438	COBLL1	46.5916	60.0244	32.5231	26.9754	41.2666	47.3312	28.2765	12.4585	27.4146	33.3885	34.9987	44.6155	25.3994	26.4985	42.0276	34.5045	32.6989	21.1135	32.3894	23.3426	22.2828	28.8221	13.5885	19.6507	87.6079	53.7689	72.2431	49.1932	58.8269	58.3431
ENSG00000082458	DLG3	337.413	306.791	301.29	312.715	301.72	295.065	253.513	315.615	247.786	285.418	262.017	241.816	277.084	248.897	283.069	229.701	230.2	249.691	208.626	190.631	239.247	228.442	294.417	248.91	309.204	310.131	293.853	268.052	245.784	254.376
ENSG00000082482	KCNK2	4.50886	6.66938	9.03419	5.99452	8.11802	16.1128	20.4761	32.1845	22.1425	30.1574	25.5396	25.877	19.242	23.6594	25.9583	20.7027	15.6955	17.4416	15.2421	7.78087	17.5917	4.26994	4.52949	5.45854	1.03068	0.960159	1.46439	0	0.805849	5.83431
ENSG00000082497	SERTAD4	15.781	11.1156	22.1338	24.9772	30.4426	18.1269	12.6757	14.5349	18.9793	14.0016	15.1346	11.6	110.834	105.048	129.791	126.188	129.487	122.091	111.458	106.987	85.6129	155.853	89.08	94.9786	550.384	529.863	523.711	75.2957	82.1965	89.8483
ENSG00000082512	TRAF5	193.129	168.958	158.098	176.838	190.773	182.275	139.433	112.127	156.052	135.708	128.644	149.016	154.705	166.562	158.222	208.013	240.664	183.596	167.663	167.289	159.498	243.387	119.277	158.298	442.163	409.987	423.693	346.36	333.621	309.218
ENSG00000082515	MRPL22	110.467	117.826	108.41	107.901	115.005	108.761	119.931	104.859	126.529	107.705	120.131	131.17	106.985	106.94	95.1802	111.4	109.868	136.779	140.989	113.795	133.697	92.8713	163.062	137.555	120.59	108.498	113.246	123.485	112.819	138.856
ENSG00000082516	GEMIN5	288.567	329.023	299.484	301.724	303.749	245.72	512.877	539.869	476.592	474.979	469.172	486.309	455.65	441.011	451.179	404.195	412.006	472.76	389.625	382.235	402.263	366.148	455.969	458.517	250.456	263.083	232.837	171.674	139.412	172.695
ENSG00000082556	OPRK1	9.01772	6.66938	9.4859	2.99726	10.1475	10.0705	0.975052	6.22926	8.43525	3.23115	5.67546	7.13848	6.92711	5.67825	7.41664	2.95753	7.84773	2.75394	4.76314	7.78087	2.34556	6.40491	4.52949	8.73367	5.15341	2.88048	2.92877	34.1341	27.3988	33.839
ENSG00000082641	NFE2L1	1688.57	1569.53	1844.8	1631.52	1606.71	1721.04	1028.68	1097.39	863.559	1021.04	971.45	1059.17	1060.62	1006.94	1012.37	1123.86	1071.21	1113.51	1258.42	1401.53	1319.38	1065.35	1470.57	1286.03	1067.78	1051.37	1001.15	734.888	670.466	694.285
ENSG00000082684	SEMA5B	130.005	146.726	124.672	100.908	106.887	96.6765	79.9543	79.9421	59.0468	79.7017	63.376	66.9233	73.8892	63.4071	79.1109	79.8532	78.4773	92.716	61.9209	67.11	70.3668	54.4418	90.5898	70.961	36.0739	38.4063	51.7416	30.1183	29.0105	38.5064
ENSG00000082701	GSK3B	284.058	277.891	245.278	277.746	277.365	250.755	331.518	318.731	332.138	371.582	380.256	372.094	382.531	352.998	383.193	334.201	330.912	284.574	345.804	281.084	338.933	320.246	212.886	279.477	458.653	450.314	434.434	628.468	622.921	604.434
ENSG00000082781	ITGB5	632.745	662.491	687.053	796.271	755.654	753.272	714.715	829.525	684.31	776.553	727.405	717.42	753.517	832.809	751.555	906.977	915.567	935.421	881.18	953.156	920.633	913.767	1241.08	1140.84	707.047	648.107	699.003	1673.57	1624.6	1778.29
ENSG00000082805	ERC1	320.129	260.106	287.739	242.778	244.894	267.874	319.817	311.463	256.221	269.263	273.368	253.416	238.6	318.928	268.235	209.984	227.584	246.937	250.542	288.865	258.012	290.356	339.712	314.412	443.193	447.434	432.481	463.822	450.469	497.083
ENSG00000082898	XPO1	3912.47	4689.31	3720.36	4068.13	4115.79	4132.65	4049.19	2076.08	4944.01	4598.75	4862.71	4465.49	4458.73	4307.39	4646.14	4191.83	4844.77	4087.91	4064.7	3806.58	3712.43	3860.03	1125.36	1552.69	4137.09	3887.73	3997.71	2876.85	2829.84	2907.52
ENSG00000082996	RNF13	323.135	355.499	278.616	243.665	269.867	278.927	151.133	98.6299	190.848	202.453	226.638	191.847	188.526	179.811	197.692	155.763	170.034	173.498	130.51	117.62	117.278	182.505	69.4522	67.6859	134.876	138.263	154.195	166.654	208.692	175.029
ENSG00000083067	TRPM3	26.3017	33.3469	33.8782	19.9817	24.3541	30.2114	31.2017	33.2227	29.5234	35.5426	52.0251	42.8309	36.1749	53.9434	44.4998	37.462	39.2386	25.7034	36.1999	32.0961	32.8378	48.0369	49.8244	50.2186	159.756	145.944	144.974	143.564	136.188	129.522
ENSG00000083093	PALB2	155.556	166.734	156.743	128.882	138.006	151.057	97.5051	71.6364	109.658	136.785	144.724	122.247	141.621	137.224	152.041	134.074	150.415	129.435	131.463	117.686	116.105	108.884	40.7654	57.8606	103.068	131.542	117.151	80.3155	78.9731	68.8448
ENSG00000083097	DOP1A	254.615	249.491	230.915	212.252	189.597	256.659	148.756	52.0301	188.019	205.644	187.153	166.886	200.272	184.995	175.295	137.409	175.569	127.83	170.912	121.471	139.702	155.605	35.3794	43.8379	110.661	130.391	144.579	209.214	210.887	200.459
ENSG00000083099	LYRM2	99.5248	130.434	111.178	120.29	99.885	119.359	133.272	98.4011	138.392	119.929	138.269	159.922	139.293	150.312	121.329	127.965	155.554	169.781	151.095	143.125	141.136	145.443	79.0879	98.0666	157.151	148.702	156.723	175.213	161.462	171.549
ENSG00000083123	BCKDHB	159.313	182.296	147.257	169.845	156.272	141.994	128.707	119.394	153.943	120.63	137.157	139.2	132.385	143.849	119.902	136.046	107.252	121.173	107.647	97.2609	116.105	114.221	64.9227	89.5201	73.1784	82.5736	73.7074	216.852	221.608	207.701
ENSG00000083168	KAT6A	251.745	224.536	236.244	200.817	240.835	213.494	198.911	210.757	217.208	220.795	192.02	227.539	223.976	228.076	210.138	175.48	236.74	190.94	292.457	271.358	252.148	240.184	187.219	254.368	357.646	361.98	367.56	395.554	369.885	387.398
ENSG00000083223	TUT7	138.272	111.156	129.189	118.891	148.831	132.93	108.231	60.2161	154.998	160.48	159.859	147.231	143.93	145.742	133.5	117.315	134.719	130.353	176.236	139.083	106.723	150.515	40.7654	49.1269	254.578	206.434	254.315	311.223	303	329.054
ENSG00000083290	ULK2	78.1536	80.0325	70.015	77.9288	77.1212	75.5285	44.8524	44.643	43.2307	38.7738	41.6201	33.0155	33.0962	36.9086	38.3193	25.6319	39.2386	47.735	28.5789	40.8496	24.6284	33.0921	31.7064	19.6507	42.2579	39.3665	36.6096	137.54	118.46	115.519
ENSG00000083307	GRHL2	148.792	133.387	153.581	167.847	172.508	156.092	175.509	173.381	151.835	176.636	174.048	158.831	178.566	224.291	175.527	210.97	177.882	195.53	316.273	346.248	342.452	346.933	433.321	376.639	795.688	710.519	764.41	674.649	633.398	679.112
ENSG00000083312	TNPO1	2578.28	3183.4	2371.53	2416.08	2503.89	2397.64	2387.94	1189.84	3308.17	3325.06	3557.65	3080.41	3088.6	3032.77	3164.01	2815.73	3300.97	2572.74	2775.08	2384.53	2411.8	2849.49	839.299	1089.17	2815.02	2745.88	2878.21	2948	2923.69	2729.58
ENSG00000083444	PLOD1	100.698	117.826	120.155	149.863	144.095	167.17	143.333	200.374	137.073	137.862	128.644	134.739	137.003	150.474	118.666	139.004	107.252	116.583	147.658	147.837	148.943	138.773	244.593	228.167	215.412	218.916	238.695	304.195	298.97	311.551
ENSG00000083454	P2RX5	24.533	20.7417	26.05	17.7261	5.03741	20.5665	24.0081	15.7218	15.6794	16.6868	20.4621	10.9336	10.2857	7.48845	9.52325	9.4823	9.48529	15.478	7.65069	8.02158	10.0901	4.40208	6.59093	3.66614	1.03068	1.61998	1.46439	1.00394	1.6117	1.88056e-27
ENSG00000083457	ITGAE	60.1181	44.4625	64.5945	49.9544	50.7376	45.3171	43.8773	49.8341	39.013	44.159	34.9987	40.154	46.1807	50.1579	32.1388	40.4195	31.3909	50.4889	45.7262	46.6852	46.9112	32.0246	57.3736	70.961	43.2886	35.5259	47.8366	33.1301	25.7872	26.8378
ENSG00000083520	DIS3	495.068	456.878	456.639	492.221	535.364	472.782	283.014	141.809	462.297	536.57	639.913	472.311	539.111	397.828	571.683	457.725	545.905	446.084	362.817	349.237	234.82	533.18	107.908	146.438	568.878	553.19	564.446	572.609	547.092	553.773
ENSG00000083535	PIBF1	134.514	122.272	91.6971	103.905	108.917	138.972	36.0769	17.6496	43.2307	52.7755	72.8351	58.8925	59.2653	41.6405	75.4025	33.5186	44.4704	32.1293	45.7262	20.4248	10.555	64.0492	10.5688	16.3756	84.5159	82.5736	67.3617	123.485	137.8	92.182
ENSG00000083544	TDRD3	149.544	100.041	116.541	118.891	135.3	138.973	82.8794	56.0633	91.7334	90.4722	118.239	86.5541	106.216	103.155	98.8886	75.9098	109.868	86.2901	112.41	86.5621	82.0946	99.2762	25.6671	40.3932	93.792	117.139	108.853	191.753	187.763	152.859
ENSG00000083635	NUFIP1	178.211	223.811	155.575	186.077	167.798	172.794	174.365	141.215	189.817	155.31	181.184	168.379	162.115	159.185	178.092	171.377	180.632	156.016	157.339	160.163	142.668	142.566	106.762	130.53	99.041	125.372	91.7435	77.9912	91.8055	65.3442
ENSG00000083642	PDS5B	435.856	584.682	435.9	512.532	472.876	484.391	376.37	228.406	634.753	664.54	668.758	576.432	614.204	531.862	661.318	586.576	750.765	545.281	601.11	485.331	451.52	672.517	196.278	211.791	687.465	696.115	691.678	545.141	570.541	546.091
ENSG00000083720	OXCT1	252.35	213.42	216.82	221.798	208.326	205.438	223.232	175.457	268.874	221.872	243.743	225.755	244.712	184.511	245.985	232.627	219.736	197.366	237.205	224.672	216.964	167.595	108.708	128.822	111.314	148.825	139.117	99.3903	97.5076	117.71
ENSG00000083750	RRAGB	13.5266	22.2313	23.4889	12.9881	27.0601	21.148	29.2516	23.8788	30.5778	26.9262	42.566	33.9078	24.6297	32.1768	35.8471	30.5611	30.083	40.3911	26.6736	27.233	32.8378	22.4172	15.0983	22.9259	34.0125	42.247	41.0028	84.3312	81.3907	66.5111
ENSG00000083799	CYLD	148.041	193.412	138.675	98.9097	104.181	94.6625	148.208	128.738	163.433	193.869	154.183	156.154	144.7	141.956	142.152	138.018	125.564	134.943	126.7	112.823	133.697	84.3314	67.9424	89.5201	53.5954	72.0119	70.7786	119.469	113.625	148.191
ENSG00000083807	SLC27A5	22.2661	13.3388	21.2511	16.9846	15.6728	24.7269	12.6756	25.1595	18.9793	18.553	17.5216	18.967	9.75438	21.7294	11.125	23.9176	10.4636	7.34384	10.4789	15.6303	18.0421	21.3497	25.6706	23.5119	11.9624	13.7501	14.0535	15.9457	12.3125	12.587
ENSG00000083812	ZNF324	31.3686	30.3257	32.0617	26.6317	22.6721	23.1621	40.9681	31.0159	18.5225	32.0509	18.4999	29.4059	47.1544	31.9119	29.3795	42.6066	36.7077	36.2679	45.9915	49.5338	53.0594	39.2474	34.2824	35.8944	49.5965	42.3755	43.9049	57.4106	37.7822	39.498
ENSG00000083814	ZNF671	61.6211	57.8012	74.9839	55.9489	67.6502	77.5427	51.6778	47.7577	32.6866	43.082	34.9987	40.154	42.3323	37.855	33.3749	36.4761	44.4705	42.2271	60.0156	54.4661	53.9479	44.8344	49.8244	56.7688	39.1659	36.486	36.6096	50.1971	53.186	67.678
ENSG00000083817	ZNF416	82.6321	111.156	97.1176	91.3642	83.7779	99.1403	66.3035	66.2916	62.21	87.241	88.9156	78.1294	69.12	80.4419	64.2776	79.8532	91.4013	82.3394	63.8261	78.7813	74.9064	69.231	69.1344	89.3224	56.5082	55.6892	65.8974	53.209	53.9919	44.3407
ENSG00000083828	ZNF586	92.4316	68.9169	112.024	91.9161	92.6807	107.754	113.106	105.897	98.0599	119.553	102.158	85.6619	87.7433	88.0129	95.1803	113.372	102.02	115.666	121.937	118.658	119.624	77.9264	105.688	116.813	97.9147	91.3904	105.436	80.3154	107.472	93.3489
ENSG00000083838	ZNF446	13.2672	11.1156	17.3727	22.3021	11.7162	23.6114	9.34022	5.98681	11.0009	6.21916	16.2668	11.6014	8.47586	17.072	16.0694	7.62939	14.3875	22.1939	18.9166	5.76712	17.1425	22.3333	12.0752	24.9572	23.0307	21.0719	13.8319	30.4628	25.1686	34.7808
ENSG00000083844	ZNF264	108.213	128.941	90.3419	82.9243	81.1802	74.5215	101.405	109.012	101.223	94.7804	74.727	80.3079	88.513	116.404	90.2358	81.8249	77.1693	101.896	96.2155	66.1374	84.4401	118.491	86.0603	87.3367	82.4545	104.657	98.602	104.41	132.159	140.023
ENSG00000083845	RPS5	1346.01	1559.7	1618.1	1523.67	1494.04	1386.88	1722.39	1863.96	1557.38	1563.97	1729.89	1616.26	1532.44	1585	1536.1	1684.64	1584.26	1816.21	1720.84	1877.07	1782.84	1657.46	2230.9	2033.77	1498.8	1581.13	1472.91	1247.39	1224.7	1239.25
ENSG00000083857	FAT1	993.456	998.184	1072.81	1174.93	1227.85	1153.07	1289.02	1267.65	1160.9	1211.67	1092.53	1309.9	1246.1	1436.6	1181.71	927.68	1287.03	1046.5	1051.7	1046.52	1125.87	1191.31	1108.22	1199.79	1860.36	1817.57	1844.67	1909.5	1854.27	1906.65
ENSG00000083896	YTHDC1	771.018	778.092	720.022	708.355	674.475	786.502	547.004	395.558	583.089	654.846	710.376	708.493	678.858	692.748	645.25	634.882	698.445	680.221	781.156	764.472	777.555	815.561	386.516	498.911	774.043	794.051	732.191	717.821	760.721	694.282
ENSG00000083937	CHMP2B	526.032	640.26	440.868	511.533	506.022	513.595	409.522	231.521	552.511	508.367	560.924	456.863	417.167	421.137	501.859	484.048	525.797	425.943	431.54	405.579	342.452	511.324	143.434	186.682	502.973	503.125	511.556	423.664	499.627	483.081
ENSG00000084070	SMAP2	36.0709	48.9087	34.33	26.9754	41.9431	29.2044	31.2017	34.2609	41.1219	25.8492	25.5396	33.9078	30.0175	24.6057	24.7221	27.6036	36.6227	28.4574	37.1525	39.877	45.7384	29.8896	49.8244	37.1181	35.0432	39.3665	29.2877	26.1025	26.593	22.1704
ENSG00000084072	PPIE	146.538	157.842	156.292	139.872	138.683	133.937	104.331	121.471	88.5701	94.7804	92.6992	109.754	106.985	114.511	106.305	125.202	85.017	112.912	101.931	119.631	110.241	105.681	102.668	108.079	102.037	95.0557	88.8394	131.517	100.731	131.855
ENSG00000084073	ZMPSTE24	453.139	511.32	408.343	396.637	383.575	371.601	569.433	341.571	641.082	639.767	701.865	556.798	630.37	546.056	627.944	626.008	702.369	681.141	505.844	506.727	548.86	638.354	211.376	363.539	697.772	661.546	695.59	476.874	461.752	467.911
ENSG00000084090	STARD7	991.211	1164.4	1064.61	1060.52	1043.41	980.48	1418.27	1598.18	1340.49	1382.53	1399.22	1321.68	1324.73	1372.83	1352	1311.92	1335.61	1341.05	1295.26	1329.73	1440.95	1132.76	1533.28	1452.74	1046.43	1074.76	1125.41	1085.25	1027.05	1041.96
ENSG00000084092	NOA1	111.219	168.958	165.777	181.834	181.979	151.057	204.761	209.718	172.923	165.866	150.4	151.693	155.475	175.079	161.93	159.706	179.19	134.943	102.884	153.672	143.079	159.055	194.768	148.472	158.725	158.426	176.703	231.911	279.629	255.543
ENSG00000084093	REST	515.513	551.335	444.031	435.602	452.579	431.016	358.819	187.916	440.742	444.822	419.038	400.648	505.679	484.545	400.499	471.232	512.718	442.467	451.547	445.455	439.793	736.565	240.063	298.036	1251.25	1211.72	1266.7	894.515	905.771	939.324
ENSG00000084112	SSH1	156.307	191.189	154.484	175.839	196.185	150.05	145.283	154.693	153.943	145.402	125.806	144.554	150.087	164.669	150.805	130.131	147.799	148.713	151.468	144.919	143.079	137.706	212.886	169.215	173.155	192.992	187.441	269.057	241.755	250.875
ENSG00000084207	GSTP1	1046.81	1002.63	1206.51	1191.91	1228.52	1161.12	1365.07	1485.68	1188.31	1296.77	1315.77	1330.44	1313.84	1242.59	1283.08	1322.02	1266.1	1465.09	1323.2	1433.62	1455.42	1235.08	1669.87	1479.26	1381.12	1357.66	1340.39	1520.97	1381.22	1410.73
ENSG00000084234	APLP2	1709.61	1927.45	1846.12	1810.35	1833.32	1742.2	1877.95	2073.3	1806.2	1708.2	1678.05	1631.14	1735.63	1814.19	1729.31	1767.61	1808.9	1707.44	1680.44	1667.06	1760.34	1553.19	2113.76	1944.33	2019.11	2012.5	1982.29	3097.16	3075.89	3052.52
ENSG00000084444	FAM234B	161.567	180.073	162.616	178.837	156.272	173.212	139.432	165.075	143.399	136.785	108.78	124.031	125.458	158.045	121.139	129.145	111.176	122.091	126.7	115.74	131.351	108.884	140.414	116.813	122.651	171.868	149.855	259.017	270.765	262.544
ENSG00000084453	SLCO1A2	99.1949	102.264	98.4727	83.9233	99.4457	125.342	41.9272	16.6114	51.6659	74.3164	52.971	49.0771	53.8775	48.2651	60.5692	36.4762	56.242	33.9653	33.342	38.9043	38.7017	39.497	18.118	20.7425	51.5341	40.3267	51.7416	43.1695	46.7392	57.1762
ENSG00000084463	WBP11	572.527	504.649	547.916	633.394	582.446	578.996	767.211	785.695	684.182	663.435	628.693	670.119	653.389	668.081	631.504	655.485	676.098	703.149	712.558	730.414	731.726	679.951	830.237	809.963	680.221	658.656	686.72	636.445	609.895	575.252
ENSG00000084623	EIF3I	450.751	395.716	475.365	505.781	576.777	579.605	721.402	760.223	588.291	613.894	578.981	629.971	596.21	566.608	640.417	664.605	575.246	656.431	656.362	742.104	642.064	634.17	945.188	840.816	545.596	515.618	529.615	391.54	396.576	382.73
ENSG00000084628	NKAIN1	154.804	171.181	159.454	176.838	179.273	160.121	242.788	267.858	201.392	215.41	187.29	207.908	204.735	198.739	195.305	196.183	175.266	186.35	162.9	190.631	158.325	140.908	215.906	181.224	61.8409	69.1314	73.2193	13.0513	17.7287	16.3361
ENSG00000084636	COL16A1	20.2899	20.0081	24.3923	23.9781	21.6481	25.1762	12.6757	21.8024	25.3058	24.7721	27.4314	29.4462	27.7084	23.6594	27.1944	38.4478	32.6989	31.2113	43.8209	40.8496	43.3929	33.0921	30.1966	36.0264	32.9818	30.7251	39.0503	35.138	38.6807	42.007
ENSG00000084652	TXLNA	273.537	295.676	304.452	308.717	328.78	298.086	323.717	355.068	272.037	305.882	315.935	288.216	297.096	290.538	313.971	327.3	330.913	337.817	326.752	342.358	343.624	349.068	392.556	339.521	280.345	273.646	260.66	292.148	265.93	263.711
ENSG00000084674	APOB	17.284	26.6775	23.4889	29.9726	23.0011	25.1762	16.5759	7.26747	24.2513	26.9262	36.8905	31.2309	29.2478	29.3376	37.0832	22.6744	27.4445	19.2776	27.6262	17.507	14.0734	22.4172	4.52949	10.9171	13.3989	9.60159	10.7388	18.071	15.3111	18.6698
ENSG00000084676	NCOA1	187.118	180.073	176.167	154.858	158.978	182.276	152.108	115.241	164.487	187.407	179.723	170.431	177.796	171.294	206.43	214.914	292.981	249.691	368.667	344.303	384.672	401.375	250.632	316.596	345.278	381.183	385.135	247.974	268.347	264.878
ENSG00000084693	AGBL5	157.884	149.222	187.608	191.817	215.891	222.966	160.594	196.303	156.317	113.176	150.479	156.281	123.988	136.278	124.881	122.269	151.853	156.778	139.13	153.054	140.899	150.425	208.327	188.6	180.539	158.712	172.852	213.905	187.825	193.723
ENSG00000084710	EFR3B	42.0827	46.6856	47.8812	62.9425	60.8851	48.3383	70.2037	84.095	62.21	53.8525	69.0515	64.2464	70.0407	63.4071	71.6942	93.655	73.2455	87.2081	80.0208	67.11	94.9952	88.6013	132.865	106.987	51.5341	54.729	55.1585	8.03154	14.5053	19.8366
ENSG00000084731	KIF3C	263.769	260.106	292.708	289.735	328.104	323.263	286.665	336.379	278.363	270.34	265.8	329.263	292.479	289.59	260.819	255.333	257.667	300.179	335.325	329.714	364.735	346.933	463.519	405.024	282.407	288.047	305.081	213.84	273.182	248.541
ENSG00000084733	RAB10	1137.74	1120.46	966.211	1026.07	1054.67	980.866	981.876	717.404	1109.23	1025.35	1025.37	915.508	907.45	872.559	911.012	933.593	1008.43	904.211	918.335	829.637	770.516	857.191	452.95	493.452	920.399	908.311	856.176	1005.95	1066.94	941.655
ENSG00000084754	HADHA	723.539	700.284	736.476	758.158	761.618	774.111	770.781	859.073	669.175	639.665	713.192	691.341	699.519	673.82	670.617	696.335	596.345	694.565	671.437	738.666	739.896	689.416	763.543	820.214	710.722	772.67	681.149	686.531	673.311	691.85
ENSG00000084764	MAPRE3	22.5443	22.2313	30.7163	16.9845	19.6185	24.1691	20.4761	22.8406	11.5985	19.3869	16.0805	8.9231	16.9329	21.7666	12.3611	17.7452	15.6955	21.1135	9.52629	7.78087	5.8639	12.8098	15.0983	7.64196	11.3375	3.84063	11.227	17.067	14.5053	10.5017
ENSG00000084774	CAD	600.428	629.145	696.086	720.344	739.415	711.984	732.264	895.971	615.772	725.933	604.439	770.959	757.36	713.569	702.106	630.939	664.442	682.976	771.63	737.234	748.237	631.951	893.821	768.564	461.745	454.154	523.276	230.907	206.297	217.036
ENSG00000085063	CD59	290.822	293.601	340.355	282.396	287.526	247.359	367.785	392.085	331.088	314.85	349.077	292.548	318.622	323.578	316.749	276.64	260.55	307.646	257.075	252.308	227.637	255.908	289.051	307.38	214.528	207.741	226.365	523.789	500.699	518.387
ENSG00000085117	CD82	10.5207	8.8925	14.4547	10.99	11.5005	10.0705	3.90021	12.4585	6.32644	7.53935	6.62137	5.35386	6.15743	6.62462	6.18054	3.94337	13.0795	11.0158	5.71577	4.86304	7.03668	2.13497	6.03932	2.18342	5.15341	6.72111	2.92877	2.00789	4.02924	1.16686
ENSG00000085185	BCORL1	24.7987	15.5619	21.6821	27.9744	23.6776	24.1691	18.526	24.917	18.9793	15.0787	10.405	16.9539	12.3149	20.8203	11.125	17.7452	9.15568	20.1956	10.4789	8.75348	3.51834	12.8098	15.0983	7.64196	38.1352	45.1275	38.074	99.3903	86.2258	72.3454
ENSG00000085224	ATRX	913.796	1055.99	859.154	905.174	821.951	883.18	425.123	390.367	747.575	1065.2	1450.08	726.34	1246.88	708.836	1145.87	628.967	1202.01	591.179	434.399	298.591	365.907	951.129	294.417	298.036	1419.25	1273.17	1429.23	1473.79	1478.73	1424.74
ENSG00000085231	AK6	174.088	182.39	175.49	160.853	180.98	160.691	150.579	81.8948	193.024	206.746	212.113	159.147	189.646	132.372	184.666	167.848	183.114	179.725	169.358	152.001	100.711	170.791	76.4619	76.9054	173.481	168.267	180.761	125.276	119.703	108.978
ENSG00000085274	MYNN	238.378	268.505	197.346	199.016	200.605	198.012	127.872	69.1903	194.812	183.486	213.443	165.508	212.796	178.096	240.903	187.642	210.357	172.64	167.64	127.526	136.263	166.035	47.2454	68.7776	164.173	165.642	164.309	162.162	137.962	125.972
ENSG00000085365	SCAMP1	556.093	651.375	480.619	513.531	525.643	553.877	404.647	196.221	650.567	511.599	523.09	479.171	468.736	468.455	512.985	351.946	485.25	381.88	310.557	246.07	231.038	333.056	92.0997	93.8869	357.647	357.18	388.062	480.889	502.043	501.75
ENSG00000085377	PREP	279.549	228.982	270.121	322.706	320.66	289.023	319.817	431.895	332.137	320.961	286.611	331.047	315.569	329.338	312.735	341.102	290.366	334.145	341.041	331.659	301.404	318.11	440.869	373.364	243.241	289.007	250.411	268.053	274.794	269.545
ENSG00000085382	HACE1	139.023	164.511	121.962	144.868	169.802	156.092	117.981	65.4072	152.889	134.631	157.021	138.308	111.603	131.546	117.43	105.485	122.948	115.665	95.2629	82.6717	78.5763	102.479	31.7064	55.6771	108.222	122.9	125.449	156.615	178.898	156.359
ENSG00000085415	SEH1L	229.952	289.006	252.946	303.723	285.484	223.564	486.549	389.329	477.611	494.366	495.615	439.909	454.11	402.209	490.735	442.643	391.079	443.298	347.71	326.796	338.934	331.988	226.475	247.818	288.591	311.091	295.318	187.695	203.074	164.527
ENSG00000085433	WDR47	49.5975	46.6856	38.3953	37.9653	41.2666	39.2748	52.6528	36.3373	47.4483	44.159	45.4037	28.5539	40.0233	48.2651	37.0832	46.3346	37.9307	25.7034	43.8209	51.5482	46.9112	35.227	28.6868	28.3844	62.8716	52.8087	51.7416	80.3154	76.5556	73.5122
ENSG00000085449	WDFY1	1076.87	1191.6	1030.8	927.143	958.602	998.991	956.526	521.181	1073.39	1027.51	1098.2	969.941	1050.61	982.33	1050.69	1062.74	1179.77	1000.6	996.449	861.731	945.254	811.289	308.005	331.879	721.477	689.394	718.994	677.661	694.526	731.622
ENSG00000085465	OVGP1	5.26034	2.22313	2.71026	0.999087	4.05901	6.04228	0.975052	3.11463	1.05441	0	0	0	0.769679	2.83912	0	0	0	0	0	0	1.17278	0	0	1.09171	18.5523	14.4024	19.5251	6.02366	16.9228	12.8355
ENSG00000085491	SLC25A24	395.684	502.427	316.972	356.674	386.881	325.987	415.371	192.367	456.983	429.352	470.511	384.026	406.945	393.775	466.94	396.332	444.552	438.795	281.978	290.076	307.668	345.866	102.315	117.098	413.658	416.709	411.693	605.813	548.049	577.69
ENSG00000085511	MAP3K4	311.448	285.737	332.167	320.788	309.353	272.41	319.424	310.945	319.581	319.463	338.367	370.835	336.611	313.695	313.341	350.028	313.542	362.742	364.453	356.431	387.442	324.765	332.315	389.639	415.443	403.084	387.315	239.451	241.512	232.446
ENSG00000085552	IGSF9	51.8519	55.5781	54.6569	58.9462	69.0032	69.4863	100.43	111.088	100.169	120.63	113.509	127.6	113.143	137.224	134.736	137.032	143.875	136.779	162.899	161.453	154.807	139.841	161.552	168.123	189.645	180.51	201.109	92.3627	85.4199	92.182
ENSG00000085644	ZNF213	37.5738	51.1319	36.1368	42.9608	34.5016	33.5688	28.2765	33.2227	36.9042	28.0033	23.6478	30.3386	23.0904	26.4985	37.0832	32.5328	37.9307	28.4574	22.8631	35.9865	35.1834	35.227	57.3736	38.2098	39.1659	35.5259	39.5384	41.1617	48.3509	51.3419
ENSG00000085662	AKR1B1	355.855	340.138	384.406	411.594	392.371	387.661	414.397	498.832	344.791	353.171	395.312	395.294	381.351	379.497	381.957	426.87	302.137	418.6	396.293	430.866	421.019	384.222	502.774	451.967	298.802	303.139	294.701	215.848	190.986	206.534
ENSG00000085719	CPNE3	317.122	469.08	337.88	382.65	384.928	364.551	496.3	397.634	550.399	494.366	552.41	502.372	487.974	479.813	475.902	421.939	447.32	441.55	415.346	419.193	431.584	433.399	179.67	287.12	458.652	405.188	428.091	601.363	561.675	578.761
ENSG00000085721	RRN3	309.631	340.825	311.107	288.858	329.258	303.102	358.502	278.155	358.482	346.555	345.743	349.54	343.725	329.093	295.026	348.453	406.5	361.826	356.848	333.75	368.961	281.959	171.353	242.01	260.206	304.651	265.026	221.441	206.497	191.782
ENSG00000085733	CTTN	507.247	489.088	583.156	597.453	524.286	454.178	698.138	759.967	633.698	634.383	682.949	686.188	716.57	652.053	715.704	650.657	664.441	646.259	631.594	635.112	598.118	556.161	779.072	708.518	627.684	670.189	637.501	671.638	667.244	654.609
ENSG00000085760	MTIF2	295.321	297.899	250.247	244.777	260.451	302.114	179.394	110.021	191.902	207.862	223.235	207.902	191.65	173.187	170.583	183.358	213.197	205.628	246.708	226.618	234.556	192.147	67.9424	99.3455	218.504	209.279	199.633	244.962	227.245	173.862
ENSG00000085788	DDHD2	148.041	168.958	136.868	176.838	189.421	159.114	85.8068	75.7893	109.671	81.8558	82.2951	88.3387	80.0466	105.048	76.6386	88.7258	102.193	92.716	64.7788	52.5209	64.5029	64.0491	37.7458	43.6683	103.068	98.8963	130.33	310.248	305.416	332.561
ENSG00000085831	TTC39A	36.8224	17.785	31.6197	32.9699	34.5016	45.3171	12.6757	11.4203	20.0337	14.0016	18.9182	13.3847	13.8542	15.142	19.7777	15.7735	10.4636	12.8517	14.2894	12.6439	12.9006	16.0123	30.1966	21.8342	27.8284	26.8844	25.8708	10.0394	18.5345	23.3372
ENSG00000085832	EPS15	773.273	862.574	632.391	632.421	656.883	756.296	254.489	155.731	351.118	311.268	324.447	269.478	280.163	282.02	334.986	288.852	309.985	268.968	237.204	205.22	208.755	276.479	104.178	129.913	322.604	269.804	286.532	503.976	462.556	469.078
ENSG00000085840	ORC1	232.206	204.527	243.47	241.779	230.688	198.389	320.791	363.374	261.493	295.113	304.583	314.092	329.421	317.983	305.318	361.804	337.451	358.012	357.236	386.127	350.661	343.731	425.771	360.263	245.303	281.327	252.364	94.3707	107.178	106.184
ENSG00000085871	MGST2	25.5502	26.6775	11.3185	15.1097	14.883	11.0775	17.5509	10.3821	10.5441	8.6164	15.1346	17.8462	6.92711	10.4101	11.125	9.85842	10.4636	10.0978	16.1947	6.80826	16.4189	14.9448	4.52949	20.7425	23.7057	23.0438	14.1557	7.0276	8.05849	12.8355
ENSG00000085872	CHERP	173.876	216.569	227.295	289.778	242.01	200.015	375.748	370.932	320.828	367.991	264.544	347.951	361.216	357.787	290.195	328.088	318.634	341.415	359.692	381.422	366.537	333.875	509.087	414.146	292.957	304.722	302.388	219.536	191.753	215.62
ENSG00000085978	ATG16L1	115.727	155.619	112.024	132.879	134.624	125.881	140.407	139.12	131.801	110.936	126.752	123.139	120.07	123.975	116.194	133.089	133.411	120.255	114.316	122.549	120.796	100.344	137.395	158.298	97.9148	102.737	100.066	110.434	99.9253	100.35
ENSG00000085982	USP40	87.9228	75.5863	77.2424	58.9461	66.2972	90.6343	51.6778	68.5218	59.0468	85.0869	59.5924	62.4617	60.8046	67.1926	66.7498	53.2354	43.1625	59.6687	77.1629	70.0278	57.4662	61.9142	75.4915	69.8693	81.4238	67.2111	66.3855	134.528	111.207	119.02
ENSG00000085998	POMGNT1	82.724	106.71	103.009	114.729	104.764	101.177	113.814	127.889	85.0369	107.382	115.297	111.421	115.265	114.571	135.343	107.149	100.806	111.993	113.214	137.138	162.37	144.118	171.392	181.133	138.189	144.984	142.975	175.902	192.156	180.305
ENSG00000085999	RAD54L	113.657	148.476	136.325	139.395	132.442	122.649	156.375	168.395	134.162	129.962	126.622	128.287	162.278	150.704	129.774	148.803	124.165	164.176	147.958	139.774	126.921	140.901	164.918	181.411	143.185	144.375	136.179	94.2059	85.5647	96.3752
ENSG00000086015	MAST2	131.508	133.388	137.772	162.851	140.712	131.923	140.407	183.763	136.018	180.944	155.129	159.724	156.245	180.758	140.916	110.414	132.103	150.549	132.415	154.645	159.498	135.571	187.219	192.141	221.596	227.558	229.42	202.797	190.986	213.536
ENSG00000086061	DNAJA1	451.614	517.988	455.323	606.446	592.587	435.045	1716.09	1352.79	1746.05	1867.61	2014.75	1855.92	1730.24	1718.61	1868.95	2035.76	1883.45	1970.81	2026.25	1969.49	2060.57	1661	831.094	1255.37	1878.93	1783.98	1780.17	1157.55	1130.58	1109.58
ENSG00000086062	B4GALT1	146.538	142.28	147.709	174.84	162.36	131.923	153.083	172.343	147.617	131.4	110.672	135.631	128.536	153.313	143.388	121.259	143.875	161.564	146.705	167.289	158.325	170.798	256.671	213.975	286.529	320.693	308.009	626.46	619.698	595.099
ENSG00000086065	CHMP5	155.348	147.837	146.293	194.531	189.999	150.05	186.235	133.929	192.789	176.636	201.177	190.67	182.342	199.685	191.329	238.445	214.505	186.152	145.621	173.124	187.645	180.124	83.0407	111.354	254.397	217.824	231.287	331.866	325.371	264.596
ENSG00000086102	NFX1	221.686	155.619	219.531	230.789	202.274	250.755	257.414	250.208	233.024	214.333	244.045	225.754	263.23	224.291	220.027	253.361	247.203	256.116	324.846	293.728	333.069	275.411	279.319	269.652	194.799	191.072	205.502	184.725	178.093	176.196
ENSG00000086189	DIMT1	206.069	220.545	187.976	223.975	226.709	229.806	263.9	301.364	271.796	272.83	258.76	262.959	262.788	208.219	285.204	288.782	275.215	269.954	244.371	237.902	246.729	230.842	214.3	255.328	160.394	160.399	143.65	89.8901	83.2308	101.647
ENSG00000086200	IPO11	418.572	471.303	403.379	454.588	461.373	411.883	517.754	337.418	527.205	521.292	577.95	551.447	507.219	500.631	567.372	483.062	519.257	507.642	490.613	497.01	541.825	484.638	169.101	277.294	396.813	433.992	421.254	259.372	268.347	266.044
ENSG00000086232	EIF2AK1	478.337	502.192	527.408	528.382	514.979	573.114	634.027	637.038	477.758	548.939	539.316	578.899	548.447	567.591	551.251	514.963	474.716	541.169	511.563	544.285	558.633	581.248	700.262	649.684	536.693	631.009	523.254	681.748	663.187	643.192
ENSG00000086289	EPDR1	97.692	108.933	85.8249	76.9297	76.4447	108.761	66.3035	56.0633	65.3732	57.0836	54.8628	66.9233	58.4956	54.8898	55.6248	61.1222	57.55	69.7665	68.5893	56.4113	65.6757	45.9019	55.8637	67.6859	35.0432	33.6055	34.6571	8.03154	4.83509	3.50058
ENSG00000086300	SNX10	226.865	304.491	181.508	189.776	194.81	223.425	53.3147	26.9934	71.6996	54.9296	78.4555	46.4002	83.8949	46.3724	64.2776	41.4054	73.2455	43.1451	24.7683	20.4248	15.2461	54.4418	6.03932	10.9171	52.5648	66.251	57.0922	100.159	91.0269	102.684
ENSG00000086475	SEPHS1	3178.56	3938.72	3142.14	3478.43	3429.43	3336.38	5684.64	5593.9	5656.74	5616.03	5672.27	5430.7	5731.18	5280.87	5725.03	5620.65	5430.05	5357.39	4683	4846.74	5059.53	4114.55	4444.07	4601.66	1664.15	1787.19	1600.81	587.244	629.723	625.325
ENSG00000086504	MRPL28	259.358	255.659	262.443	261.761	282.778	248.001	210.651	249.17	216.16	207.871	244.991	225.755	221.668	189.384	226.21	211.956	183.114	205.628	234.347	239.262	229.865	226.307	283.851	319.871	245.307	272.685	269.935	342.344	344.097	327.888
ENSG00000086544	ITPKC	55.6093	48.9088	51.4949	55.9489	55.4731	48.3383	48.7526	42.5666	36.9042	40.9279	41.6201	43.7232	31.5568	53.9434	42.0276	37.462	35.3148	52.3249	53.3472	52.5209	50.4295	61.9142	63.4129	48.0352	69.0557	65.2908	71.7549	111.438	111.207	133.022
ENSG00000086570	FAT2	8.26624	13.3388	14.2177	15.9854	6.08851	12.0846	19.501	12.1086	15.8161	12.9246	7.96881	13.3847	11.5452	23.6594	14.8333	7.88673	6.53977	10.0978	14.2894	12.6439	16.4189	8.53989	18.118	10.9171	25.767	20.1633	30.1993	132.141	116.624	123.33
ENSG00000086589	RBM22	127	126.718	120.607	164.849	170.478	131.923	185.26	191.031	179.249	210.025	172.156	200.77	167.02	199.685	174.291	204.069	173.958	210.217	223.868	223.7	224.001	200.687	255.161	235.809	215.412	236.199	213.313	159.627	149.888	166.861
ENSG00000086598	TMED2	1211.87	1398.02	1180.44	1233.84	1296.15	1206.42	1674.74	1553.11	1694.4	1505.22	1524.71	1369.38	1397.39	1468.73	1437.54	1488.58	1447.85	1401.69	1349.81	1289.62	1339.24	1386.41	1361.78	1398.38	1436.72	1424.68	1406.73	1934.86	1846.41	1862.23
ENSG00000086619	ERO1B	48.0945	60.0244	39.2987	36.9662	35.8546	43.303	35.1019	12.4585	33.741	25.8492	27.4314	19.6308	26.9388	26.4985	30.9027	18.731	11.7716	17.4416	20.9578	8.75348	14.0734	13.8773	4.52949	8.73367	24.7364	20.1633	21.4777	24.0946	24.1755	17.5029
ENSG00000086666	ZFAND6	707.856	718.069	591.268	672.37	698.131	678.272	628.877	491.731	745.417	604.206	635.588	596.945	618.391	593.369	737.947	640.769	703.679	617.792	556.31	522.29	607.177	535.878	271.754	364.608	546.256	509.843	523.274	663.518	617.167	625.389
ENSG00000086712	TXLNG	1203.62	1093.78	1094.03	927.595	1005.55	1034.75	1034.7	625.013	1101.62	1066.75	1150.23	1114.01	947.061	941.469	1017.31	885.184	954.114	972.559	839.711	795.044	824.462	829.504	261.201	405.023	459.031	481.999	443.85	236.93	214.52	249.709
ENSG00000086758	HUWE1	2179.3	1876.32	2123.49	2089.1	2089.69	2181.25	2319.66	2530.13	1882.1	2058.23	1757.5	2207.56	2138.16	2330.95	2090.26	1507.36	1798.44	1693.68	2112.94	2080.41	2213.04	2098.68	2885.28	2582.98	2235.57	2333.2	2343	2696.59	2660.12	2730.47
ENSG00000086827	ZW10	217.177	213.42	214.561	206.811	231.364	228.599	288.615	242.942	273.092	264.954	288.503	290.893	250.915	229.023	247.221	248.432	258.975	256.116	261.974	280.111	250.975	283.951	200.808	281.661	275.192	304.37	328.51	252.994	218.385	235.706
ENSG00000086848	ALG9	103.442	93.358	86.7994	92.915	79.6832	83.2814	98.231	73.7071	49.8498	94.7209	83.2398	74.8504	76.1832	72.1634	86.5272	83.7961	74.3744	78.7797	68.0663	62.2469	80.9137	84.4414	77.4944	74.1449	65.9636	116.379	88.1135	133.923	121.68	104.269
ENSG00000086967	MYBPC2	12.7751	13.3388	16.7133	9.99087	12.177	17.1198	6.82536	7.26747	5.27203	7.53935	4.72955	8.03079	6.15743	7.571	9.88886	12.8159	9.15568	10.0978	5.71577	15.5617	7.03668	6.40491	7.54915	17.4673	3.09204	7.68127	5.85754	6.02366	2.41755	4.66744
ENSG00000086991	NOX4	27.0532	24.4544	14.9064	15.9854	14.2065	8.05638	7.80042	7.26747	6.32644	8.6164	10.405	4.46155	9.23614	10.4101	14.8333	9.85841	7.84773	9.1798	7.62103	12.6439	8.20946	10.6749	0	3.27512	9.27613	6.72111	5.85754	19.0749	13.6994	10.5017
ENSG00000087008	ACOX3	27.8046	24.4544	24.844	21.9799	23.0011	20.1409	26.3264	35.2991	23.1969	24.7721	26.4855	35.6924	34.6355	29.3376	24.7221	24.646	34.0068	29.3754	25.721	27.233	29.3195	35.227	45.2949	26.201	69.0557	39.3665	44.9078	69.272	74.9439	63.0105
ENSG00000087053	MTMR2	681.146	710.267	592.41	669.481	655.498	702.02	663.408	466.225	689.019	657.554	654.587	606.55	643.057	619.83	726.441	681.433	728.987	629.77	643.509	640.872	643.904	656.143	321.494	470.618	632.547	645.965	623.498	504.408	559.762	546.222
ENSG00000087074	PPP1R15A	67.6329	68.9169	73.6287	78.9279	94.7102	72.5074	45.8274	53.9869	33.741	43.082	41.6201	47.2925	53.8775	48.2651	48.2082	61.1222	39.2386	55.0788	65.7314	71.973	56.2934	49.1043	89.08	84.0615	91.7307	48.9681	73.2193	90.3549	90.255	93.3489
ENSG00000087076	HSD17B14	8.26624	6.66938	16.7133	7.9927	16.236	18.1269	5.85031	7.26747	3.16322	4.3082	4.72955	10.7077	6.92711	13.2492	11.125	7.88673	11.7716	6.42586	6.6684	12.6439	2.34556	7.4724	9.05898	4.36683	7.21477	5.76095	3.90503	28.1104	28.2047	28.0047
ENSG00000087077	TRIP6	275.041	182.296	269.671	237.783	209.715	221.55	273.99	283.431	261.493	278.956	287.556	279.293	258.612	260.253	245.985	285.894	243.279	290.082	261.02	267.467	311.959	264.736	330.653	336.246	264.885	241	301.176	379.49	365.856	333.723
ENSG00000087085	ACHE	6.76329	13.3388	9.93761	5.99452	6.76502	13.0916	7.80042	5.19105	9.48966	2.1541	5.67546	6.24617	5.38775	4.73187	6.18054	5.91505	9.15568	9.1798	8.57366	7.78087	11.7278	3.20246	7.54915	6.55025	5.15341	5.76095	5.36941	26.1025	19.3404	25.6709
ENSG00000087086	FTL	1498.94	1407.79	1708.06	1427.99	1512.16	1626.01	2155.77	2426.1	1838.81	2118.42	2262	2147.71	2173.18	2185.97	2228.52	2410.91	1985.85	2435.64	2485.52	2528.59	2425.29	2044.33	2773.45	2739.1	1974.21	2040.64	1958.38	1873.12	1870.4	1814.67
ENSG00000087087	SRRT	249.49	282.337	323.424	374.658	322.015	318.227	545.055	694.562	499.789	581.606	572.276	620.157	627.288	646.373	613.109	621.08	621.278	654.52	683.034	668.182	633.301	635.153	856.073	774.021	627.685	591.459	621.876	437.719	368.273	422.404
ENSG00000087088	BAX	165.325	115.603	208.69	153.859	175.214	185.297	242.788	295.89	212.99	248.799	194.858	230.216	246.297	216.72	217.555	213.928	185.73	237.757	239.11	254.823	256.839	203.89	286.868	301.312	203.044	210.275	238.695	155.611	148.276	134.189
ENSG00000087095	NLK	233.709	244.544	244.375	220.798	217.833	216.515	242.788	214.909	273.091	239.105	252.558	248.955	228.594	217.666	247.221	209.984	201.425	216.643	230.536	192.577	194.681	246.589	164.571	221.617	207.167	200.673	191.346	223.879	244.172	221.704
ENSG00000087111	PIGS	123.242	113.379	136.416	110.899	146.801	121.853	130.657	168.19	120.202	106.628	93.6451	106.185	112.373	145.742	105.069	114.358	120.332	123.927	148.61	142.974	152.461	128.098	191.748	171.398	137.081	138.263	147.415	192.757	173.257	175.029
ENSG00000087116	ADAMTS2	37.5738	40.0163	40.2022	24.9772	41.2666	29.2044	28.2765	35.2991	36.9042	24.7722	25.5396	24.0924	23.86	38.8014	18.5416	24.646	48.3943	34.8832	34.2946	53.4935	46.9112	64.0491	83.0407	85.1533	56.6875	82.5736	73.7074	173.682	182.122	158.693
ENSG00000087128	TMPRSS11E	3.75738	11.1156	8.58248	13.9872	12.177	10.0705	4.87526	6.22926	8.43525	6.4623	13.2428	13.3847	3.84839	13.2493	6.18054	6.90089	0	7.34384	11.4315	12.6439	10.555	34.1595	13.5885	12.0088	173.155	156.506	150.344	180.71	146.664	145.858
ENSG00000087152	ATXN7L3	305.099	306.791	338.782	344.685	350.429	339.276	461.198	492.11	347.853	395.277	411.395	394.4	417.166	476.026	401.674	389.273	384.538	420.432	437.227	476.501	415.165	421.566	542.029	567.66	538.016	542.467	553.897	648.466	589.73	668.568
ENSG00000087157	PGS1	136.017	146.726	147.709	154.859	137.33	144.008	167.709	168.19	159.215	132.477	126.752	125.816	134.694	129.653	163.166	151.82	134.719	130.353	122.889	114.768	107.896	133.436	170.56	140.83	136.05	144.024	135.7	188.741	209.521	255.543
ENSG00000087191	PSMC5	483.671	406.839	448.56	477.564	434.457	444.665	527.503	543.76	461.83	526.678	566.601	558.586	501.674	528.077	548.831	549.114	555.881	593.015	597.41	628.01	667.031	560.43	697.542	734.795	577.182	563.614	577.456	430.684	428.711	481.914
ENSG00000087206	UIMC1	192.378	148.949	171.198	159.854	152.889	157.099	129.682	140.158	142.345	133.554	133.373	108.862	126.227	123.975	126.083	78.8674	100.712	98.2239	101.931	106.987	87.9585	70.4541	101.159	90.6118	109.252	92.1752	94.697	110.434	127.324	134.189
ENSG00000087245	MMP2	181.059	193.412	206.414	286.687	281.425	276.938	333.445	349.829	268.854	295.099	331.962	343.54	355.567	376.581	405.397	420.941	468.248	472.63	676.258	709.03	756.358	850.603	1159.42	1082.88	885.323	920.684	931.246	477.851	465.732	527.311
ENSG00000087253	LPCAT2	40.5797	60.0244	29.8128	34.9681	40.5901	35.2467	30.2266	22.8406	37.656	31.2345	38.7823	25.634	40.4404	30.284	34.611	36.4762	40.5466	32.9995	48.2226	38.9043	29.3195	58.7117	15.0983	22.9259	30.9204	41.2868	41.4909	82.3233	75.7498	74.6791
ENSG00000087258	GNAO1	196.136	175.627	207.786	131.88	127.182	156.092	133.582	160.923	141.29	132.477	82.2942	119.569	132.385	123.029	143.388	99.57	77.1693	91.798	95.2629	81.6991	77.4034	51.2393	95.1193	62.2274	20.6136	24.004	27.8233	51.2011	66.8854	56.0093
ENSG00000087263	OGFOD1	317.582	293.252	291.294	333.436	321.776	320.182	381.893	412.553	324.142	390.766	414.049	395.17	384.604	354.51	369.117	376.909	371.05	426.778	375.957	403.971	389.568	400.81	439.042	423.822	295.428	293.587	300.05	176.437	143.858	170.243
ENSG00000087266	SH3BP2	138.272	182.296	136.868	141.87	127.182	135.951	123.832	140.158	101.223	118.476	104.05	105.293	115.452	116.404	126.083	93.655	111.176	86.2901	78.1156	103.096	107.896	78.9939	86.0603	80.7864	72.1477	77.7728	69.3143	78.3075	66.0796	60.6768
ENSG00000087269	NOP14	240.573	230.858	264.335	225.271	237.973	241.655	379.806	425.014	282.014	368.061	363.799	363.623	325.113	361.121	324.701	374.291	320.342	335.163	371.293	365.993	340.779	330.536	404.436	406.681	312.097	324.074	296.126	157.199	167.849	163.935
ENSG00000087274	ADD1	444.105	469.079	465.262	491.551	526.995	454.178	545.054	644.706	499.789	543.911	518.359	538.063	521.073	578.235	547.595	585.59	579.424	601.277	614.445	687.634	603.982	659.705	768.504	830.791	737.949	756.604	753.674	907.565	851.781	949.823
ENSG00000087299	L2HGDH	284.058	273.444	254.313	267.755	263.159	259.818	237.913	183.763	236.187	218.641	200.533	200.77	213.971	198.739	228.68	172.522	189.653	150.549	171.473	170.206	147.77	185.742	93.6095	132.097	162.848	166.107	159.13	100.394	102.343	84.014
ENSG00000087301	TXNDC16	149.544	226.759	144.095	159.854	171.831	127.895	148.208	107.974	206.664	189.561	182.561	174.893	177.026	191.168	194.069	158.721	206.657	167.99	179.094	152.7	160.671	182.54	63.4129	85.1532	204.075	192.032	197.204	173.682	163.587	166.861
ENSG00000087302	RTRAF	774.436	761.147	771.282	765.206	797.905	754.121	740.279	563.37	796.818	806.935	922.415	815.262	811.084	678.075	806.556	820.855	830.382	846.357	812.204	787.941	705.264	823.998	454.508	463.823	726.793	794.705	753.306	817.095	839.473	793.041
ENSG00000087303	NID2	34.8265	45.8478	47.8407	48.6495	41.3874	53.0876	17.8296	31.2123	19.1328	23.0524	7.34639	21.5942	11.5548	52.606	15.3253	21.27	14.6262	8.76097	10.9967	10.1235	10.3109	7.70927	9.87904	6.84632	20.3719	14.1024	13.0453	453.526	411.37	456.248
ENSG00000087338	GMCL1	178.726	266.775	192.3	198.735	216.451	188.273	259.234	153.655	284.69	278.865	232.548	223.836	253.956	219.52	228.514	211.911	245.819	221.233	192.314	147.155	184.105	200.504	82.9272	82.844	169.032	197.719	199.082	216.852	194.983	187.708
ENSG00000087365	SF3B2	901.018	751.416	877.992	879.198	838.188	933.534	976.026	1105.69	882.541	887.486	859.831	999.39	978.261	935.02	852.914	973.026	888.103	970.308	975.494	1039.72	1110.63	941.52	1224.47	1220.53	993.578	983.206	930.869	992.897	951.708	927.653
ENSG00000087448	KLHL42	259.26	260.106	243.471	238.782	240.158	257.804	211.586	181.687	237.241	247.722	225.127	217.724	279.394	267.824	259.583	336.172	354.456	268.968	302.937	268.44	253.32	259.399	108.708	159.389	221.596	219.876	230.396	167.658	174.869	187.865
ENSG00000087460	GNAS	2299.85	2233.73	2443.99	2279.85	2239.59	2333.82	2929.58	3014.58	2553.18	2904.24	2529.2	2917.61	3225.25	3322.62	3061.6	3535.24	3336.68	3696.93	4155.37	4134.87	4347.33	4532.73	5504.24	5415.36	5159.68	5056.19	5078.46	4579.46	4536.49	4663.31
ENSG00000087470	DNM1L	582.092	623.169	579.152	670.759	626.031	593.151	548.083	334.304	661.768	634.383	691.342	639.788	615.742	558.562	640.811	567.845	554.572	502.135	546.809	540.77	506.641	586.05	224.088	322.054	602.431	560.733	578.427	531.34	566.24	528.249
ENSG00000087502	ERGIC2	153.759	171.181	119.703	154.859	125.153	157.099	129.615	62.2926	198.229	188.484	235.312	143.662	197.038	166.562	197.173	175.48	198.809	182.678	120.984	120.603	105.55	192.147	52.8441	48.0352	252.517	249.641	232.837	233.919	257.065	255.315
ENSG00000087510	TFAP2C	39.8283	26.6775	31.168	53.9507	61.5616	45.3171	15.6008	10.3821	10.5441	9.69345	6.62137	14.277	34.6355	83.281	32.1388	36.4761	52.3182	43.1451	105.742	89.48	114.932	149.448	196.278	151.747	695.71	571.294	745.86	489.924	463.363	458.576
ENSG00000087586	AURKA	414.764	383.804	418.27	443.179	410.404	402.546	455.349	502.182	466.638	460.957	456.792	428.827	390.962	440.796	441.616	416.446	420.799	435.487	476.112	525.607	576.291	443.934	542.029	551.312	526.662	529.73	504.187	360.225	354.568	372.024
ENSG00000087842	PIR	119.485	120.049	121.058	153.86	156.272	152.064	102.38	100.706	83.2981	105.551	103.104	102.616	89.2827	80.4419	105.069	99.57	83.7091	115.665	86.6893	119.631	94.9952	99.2762	108.708	116.813	109.252	121.94	111.782	54.2129	53.186	49.0082
ENSG00000087884	AAMDC	15.781	11.1156	16.2615	12.9881	13.53	16.1128	16.5759	14.5349	16.8706	10.7705	16.0805	14.277	7.69932	11.3565	17.3055	9.85842	6.53977	14.6877	16.1947	18.4796	7.03668	10.6749	18.118	16.3756	8.24545	20.1633	16.5964	20.0789	20.1462	24.5041
ENSG00000087903	RFX2	17.284	15.5619	15.8098	15.9854	19.6185	17.1198	16.5759	18.6878	17.9249	8.6164	15.1346	11.6	10.7755	17.0347	13.5972	4.92921	7.84773	8.26182	10.4789	9.72609	11.7278	17.0798	18.118	24.0176	7.21477	15.3625	11.227	14.0552	8.86433	16.3361
ENSG00000087995	METTL2A	128.474	148.296	150.418	161.447	137.868	140.495	173.001	220.365	190.968	184.101	154.895	175.632	188.563	153.471	155.358	165.658	191.22	152.001	173.7	156.092	142.519	151.765	194.889	199.662	137.577	133.912	126.447	90.2244	98.3303	111.24
ENSG00000088035	ALG6	213.419	211.197	173.908	230.789	209.039	222.557	187.21	112.127	208.773	180.944	217.56	168.647	204.735	209.149	238.569	210.97	210.581	173.498	168.615	167.289	146.598	180.405	64.9227	100.437	97.9147	130.582	107.388	103.406	112.819	108.518
ENSG00000088038	CNOT3	201.16	195.683	220.533	215.001	202.886	183.741	196.584	195.462	166.593	188.572	160.931	164.994	180.887	218.104	201.38	169.178	178.782	171.685	209.249	214.143	199.924	212.18	281.661	249.871	217.655	224.971	228.522	202.847	180.895	213.109
ENSG00000088179	PTPN4	438.111	611.359	439.061	430.607	443.786	437.058	293.49	187.916	489.245	504.06	520.252	433.662	479.51	409.781	489.498	424.898	549.341	341.489	327.704	288.865	232.211	371.485	104.178	144.106	408.15	409.987	430.528	362.423	369.884	351.225
ENSG00000088205	DDX18	935.409	1064.61	935.351	841.229	895.01	927.385	1053.98	575.166	1126.99	1255.78	1299.67	1193.01	1183.14	1090.67	1170.6	1187.93	1273.25	1163.39	1157.45	1131.09	1067.16	1084.48	344.242	512.01	840.244	844.939	912.001	673.634	644.649	683.767
ENSG00000088247	KHSRP	1006.02	1136.02	1126.11	1149.9	1098.58	1092.55	1487.9	1713.98	1392.83	1446.48	1279.78	1474.92	1490.85	1386.39	1442.49	1343.67	1417.79	1481.56	1450.83	1500.69	1424.93	1419.75	1908.26	1703.06	1462.48	1433.46	1577.6	1268.98	1208.68	1312.72
ENSG00000088256	GNA11	78.1536	106.71	84.018	71.9343	77.1212	80.5638	112.131	138.082	93.8422	102.32	99.3206	110.646	98.5189	119.243	80.347	98.5842	90.2488	125.763	129.558	130.33	144.252	120.626	157.022	147.381	144.295	137.303	157.666	118.465	122.489	119.02
ENSG00000088280	ASAP3	196.136	228.982	236.244	203.814	229.334	205.438	190.135	233.597	161.324	154.018	189.182	176.677	177.026	168.455	165.638	210.97	171.342	213.889	191.478	223.7	198.2	224.172	280.829	281.661	211.29	226.598	216.729	205.808	205.491	200.7
ENSG00000088298	EDEM2	48.846	44.4625	53.3018	57.9471	51.4141	56.3947	40.9522	55.0251	43.2307	42.005	39.7283	50.8617	41.5627	53.9434	39.5554	50.2779	31.3909	46.817	24.7684	42.7948	49.2568	50.1718	75.4915	63.3191	41.2273	38.4064	46.3722	193.761	183.734	177.363
ENSG00000088305	DNMT3B	2740.58	3181.31	3130.32	3750.66	3642.94	3254.73	8307.54	9287.02	7250.13	7834.87	7629.29	8165.98	7949.64	7597.71	8113.87	6688.86	6851.02	6946.65	4904.18	5010.96	5053.58	2928.1	3777.56	3536.07	1423.38	1500.72	1418.5	970.807	951.713	975.495
ENSG00000088325	TPX2	1863.67	1771.83	1830.76	1883.31	1866.5	1896.29	1828.22	2031.73	1707.07	1850.36	1767.89	1897.95	1723.31	1864.34	1819.53	1626.64	1682.01	1714.76	1977.63	2089.13	2146.17	1951.39	2344.73	2188.83	1739.77	1900.13	1873.96	1541.05	1563.36	1455.07
ENSG00000088340	FER1L4	8.26624	4.44625	12.1962	3.99635	8.11802	6.04228	1.9501	3.11463	1.05441	2.1541	2.83773	3.56924	3.84839	2.83912	2.47221	1.97168	1.30795	2.75394	3.81052	0	4.69112	3.20246	6.03932	3.27512	2.06136	0.960159	1.95251	2.00789	3.22339	1.16686
ENSG00000088356	PDRG1	205.905	208.974	225.403	234.786	256.394	249.739	192.085	215.948	166.596	156.172	159.859	176.677	167.02	169.391	145.861	167.593	158.262	191.858	188.613	194.522	215.792	182.54	250.632	252.185	175.216	167.068	194.76	136.536	140.218	147.024
ENSG00000088367	EPB41L1	104.455	86.7019	136.868	109.9	122.447	111.782	114.081	153.655	111.767	120.63	134.319	147.231	111.603	136.278	126.083	142.947	108.56	134.943	120.031	140.056	163.016	167.595	209.867	149.564	141.203	151.705	137.164	81.3194	75.7497	80.5134
ENSG00000088386	SLC15A1	16.5325	11.1156	9.93761	4.99544	6.08851	15.1057	6.82536	4.15284	4.21763	4.3082	3.78364	5.35386	1.53936	11.3565	4.94443	3.94337	9.15568	2.75394	0.952629	1.94522	4.69112	3.20246	0	1.09171	6.18409	4.80079	2.44064	133.524	103.954	114.352
ENSG00000088387	DOCK9	150.295	153.396	140.933	132.879	109.593	110.775	127.732	101.745	122.311	89.3951	96.4829	107.97	104.676	171.294	96.4163	107.457	104.636	93.6339	140.036	118.658	144.252	136.638	78.5112	100.437	475.144	356.219	399.29	902.543	924.308	847.14
ENSG00000088448	ANKRD10	237.467	262.329	254.313	310.716	280.072	256.797	362.719	343.647	374.314	371.582	342.42	348.001	387.918	349.212	352.29	329.271	307.369	273.558	316.273	271.358	239.247	344.798	227.984	287.119	399.904	334.135	375.859	362.423	346.515	359.393
ENSG00000088451	TGDS	111.97	113.379	84.018	97.9106	102.828	103.726	81.9044	33.2227	66.4276	71.0853	77.5646	82.9849	59.2653	66.2463	67.9859	90.6974	85.017	67.9305	81.9261	54.4661	70.3668	69.3865	19.6278	33.843	60.8102	67.2111	68.338	49.1932	68.4971	65.3442
ENSG00000088538	DOCK3	65.3785	48.9088	50.5915	41.9617	47.3551	45.3171	33.1518	41.5284	37.9586	32.3115	44.4578	44.6155	43.8717	35.0159	38.3193	35.4903	35.3148	33.9653	28.5789	35.9865	42.2201	24.5522	33.2163	22.9259	24.7364	15.3625	23.4302	18.071	21.7579	17.5029
ENSG00000088543	C3orf18	32.3135	24.4544	38.847	40.7332	33.8251	35.2467	23.7681	21.8024	9.48966	11.8476	18.9182	23.2001	13.8542	14.1956	12.3611	19.7168	13.0795	14.6877	19.0526	18.4796	18.7645	12.8098	31.7064	19.6507	6.18409	11.5219	7.32193	7.0276	11.2819	8.16803
ENSG00000088682	COQ9	101.449	102.264	109.314	121.889	112.299	117.825	83.8545	103.821	70.6452	77.5476	101.212	100.831	77.7375	88.9592	93.9441	87.7399	94.1727	100.06	121.937	117.686	121.969	96.0737	138.904	111.354	105.13	105.617	112.758	111.438	116.042	93.3488
ENSG00000088727	KIF9	14.7688	17.785	14.6528	21.9799	14.2596	15.1822	16.6295	23.0137	20.0825	19.437	17.1029	19.3423	19.4967	18.7348	19.7853	21.785	19.6599	15.7171	16.2686	8.75348	23.7262	11.7837	11.4063	20.7425	11.3375	9.21424	12.8629	11.5723	12.2506	12.354
ENSG00000088756	ARHGAP28	206.656	277.891	199.656	185.83	205.656	212.487	93.605	63.3308	182.412	182.021	191.074	165.97	170.099	172.24	207.666	140.975	168.726	124.845	176.236	124.494	111.414	223.105	55.8637	88.4284	237.057	209.315	224.051	547.149	494.792	497.083
ENSG00000088766	CRLS1	212.658	217.761	211.536	207.658	234.939	205.737	219.171	231.5	260.87	230.141	287.265	257.651	254.632	239.984	252.865	273.667	294.594	279.849	214.383	267.929	237.996	212.195	155.513	193.226	227.064	218.605	212.535	222.961	229.654	245.713
ENSG00000088808	PPP1R13B	46.3743	52.2753	49.7356	45.9537	45.7907	44.2045	41.6346	55.4678	34.1177	36.2658	36.8293	37.1769	32.8172	64.6877	39.6493	40.5867	48.8627	48.796	50.6003	56.4503	66.7422	50.8368	63.6069	56.6934	87.4834	87.8088	98.1467	92.534	115.027	95.66
ENSG00000088812	ATRN	286.313	260.106	276.899	277.746	288.19	289.022	280.815	278.24	261.493	273.571	240.262	282.863	292.478	280.127	250.93	198.154	188.346	225.823	234.347	250.933	245.111	228.442	282.338	251.093	246.333	272.685	247.969	376.479	372.303	374.562
ENSG00000088826	SMOX	68.3844	80.0325	61.8842	54.9498	50.7376	56.3947	30.2266	42.5666	23.1969	24.7721	26.4855	27.6616	34.6355	33.1231	35.8471	51.2638	57.55	47.735	45.7262	62.247	63.3301	53.3743	67.9424	55.6771	24.7364	27.8446	23.9183	22.0867	17.7287	24.5041
ENSG00000088832	FKBP1A	857.985	976.105	896.308	910.239	957.116	927.957	1271.42	1333.68	1360.72	1142.93	1274.75	1172.7	1225.83	1187.77	1172.15	1217.21	1170.34	1169.49	1144.05	1146.41	1165.91	1055.31	1228.36	1217.09	1185.91	1178.6	1140.34	1318.74	1257.9	1404.49
ENSG00000088833	NSFL1C	314.117	304.568	319.811	314.712	331.484	338.343	327.617	385.176	321.594	348.964	329.177	329.263	325.574	359.623	302.808	363.776	343.992	325.883	342.946	340.413	371.772	302.098	427.282	425.766	322.604	309.171	300.687	267.049	265.124	242.707
ENSG00000088836	SLC4A11	47.343	48.9088	50.1398	47.9562	39.2371	41.2889	53.6279	69.56	57.9924	32.3115	59.5924	49.0771	36.1749	48.2651	48.2082	40.4195	41.8545	45.899	28.5789	37.9317	28.1467	20.2822	27.1769	19.6507	16.4909	12.4821	20.5014	15.0591	14.5053	17.5029
ENSG00000088854	C20orf194	115.125	115.603	108.27	110.899	101.54	121.666	60.3646	74.8465	74.8629	82.1604	42.566	81.0565	59.2653	76.6564	71.6942	54.6925	51.1428	44.263	59.176	55.5698	50.7799	58.2894	60.5223	51.4415	54.1182	60.49	59.3603	127.501	123.295	148.164
ENSG00000088876	ZNF343	32.7174	28.9006	46.0744	35.9672	39.9133	42.296	30.2266	28.7997	26.3602	22.618	34.9987	25.877	16.1633	18.9275	14.8333	21.6885	17.0034	17.1669	29.5315	22.37	22.2828	14.9448	25.5841	24.0176	24.7364	25.9243	20.0133	54.2129	42.71	47.8413
ENSG00000088882	CPXM1	148.041	115.603	159.454	197.819	186.714	170.191	155.033	157.808	129.692	117.398	129.59	130.277	140.851	130.6	119.902	142.947	120.332	135.861	129.558	148.809	139.561	118.491	140.414	144.105	83.4852	107.538	91.7682	120.473	128.936	126.021
ENSG00000088888	MAVS	303.597	284.56	330.201	278.745	282.778	286.002	337.368	350.914	239.35	243.413	200.533	281.97	265.539	312.304	234.861	198.154	196.193	205.628	207.673	211.056	231.038	252.994	406.145	349.347	298.897	302.451	327.535	572.251	568.931	504.086
ENSG00000088899	LZTS3	158.561	151.172	165.777	124.886	118.388	152.064	123.832	153.655	123.365	118.476	103.104	120.462	115.452	116.404	124.847	115.343	95.4806	105.568	60.9682	69.0553	76.2307	90.7364	92.0996	82.9699	92.7614	74.8924	93.7207	87.343	66.0796	86.3477
ENSG00000088930	XRN2	913.7	1031.53	883.336	965.062	950.38	895.181	1296.79	1250.88	1258.84	1244.89	1243.65	1179.45	1148.15	1141.94	1182.64	1152.97	1198.09	1133.55	1069.66	1125.96	1198.58	1106.78	967.655	1137.35	960.595	1016.74	1010.84	982.528	926.523	940.278
ENSG00000088970	KIZ	174.343	131.164	157.195	145.867	153.566	155.085	93.605	63.3308	114.93	135.708	160.805	97.2618	139.312	123.029	139.68	101.542	98.0966	111.994	78.1156	87.5348	82.0946	86.4663	24.1573	45.8517	43.2886	34.5657	37.0978	40.1577	30.6222	51.3419
ENSG00000088986	DYNLL1	701.129	744.747	750.741	712.35	711.002	672.707	1168.11	1208.47	1078.66	1025.35	1074.53	1133.2	1082.93	1089.28	1053.16	1250.05	1127.46	1205.29	1287.96	1255.63	1246.67	1032.25	1204.84	1160.45	1019.27	1064.82	983.093	1552.09	1626.18	1464.41
ENSG00000088992	TESC	29.3076	28.9006	30.7163	13.9872	10.824	21.148	9.75052	13.4967	15.8161	15.0787	7.56729	6.24617	12.3149	12.3029	17.3055	6.90089	5.23182	7.34384	9.52629	5.83565	4.69112	3.20246	7.54915	6.55025	2.06136	6.72111	8.29819	4.01577	3.22339	0
ENSG00000089006	SNX5	814.25	955.462	809.562	776.598	840.332	848.98	831.98	735.186	863.661	866.398	901.564	865.98	863.899	874.393	881.025	1043.75	1019.87	963.121	907.354	907.429	925.637	908.588	734.146	822.316	879.806	815.69	804.391	625.881	587.643	644.91
ENSG00000089009	RPL6	1452.23	1419.54	1610.17	1537.68	1513.19	1525.28	1740.28	1672.67	1702.62	1908.2	2089.71	1911.25	1792.29	1795.84	1836.66	1871.15	1874.51	1984.97	2096.07	2108.57	2021.08	1967.87	1742.88	1900.09	2012.21	1960.9	1889.65	1504.1	1434.24	1457.21
ENSG00000089022	MAPKAPK5	245.277	259.486	245.478	225.035	213.856	247.392	229.365	261.722	203.029	278.631	228.634	234.682	245.054	280.164	254.407	271.656	267.972	278.744	252.504	236.812	246.291	236.304	197.884	226.689	201.215	220.758	202.069	179.72	195.558	191.342
ENSG00000089048	ESF1	257.004	322.353	229.017	186.83	208.362	228.6	167.709	101.745	216.154	231.566	438.904	203.447	260.921	176.972	249.694	165.621	357.071	183.596	164.805	120.603	99.6863	183.608	55.8637	68.7776	284.468	242.92	285.554	165.651	183.733	163.361
ENSG00000089050	RBBP9	144.283	153.396	148.161	157.856	166.419	136.958	161.859	160.922	168.705	172.328	181.615	154.37	143.93	158.991	159.458	179.423	183.114	177.17	158.136	164.371	161.844	172.933	137.395	159.389	137.081	162.267	152.784	143.564	140.218	135.356
ENSG00000089053	ANAPC5	447.88	520.211	472.488	492.55	528.348	495.467	528.479	560.633	476.592	459.9	499.441	439.017	478.74	494.954	512.984	488.978	432.933	511.315	511.562	508.675	548.861	513.46	631.109	617.907	461.745	512.725	505.214	481.892	478.674	446.908
ENSG00000089057	SLC23A2	190.875	211.197	225.404	164.849	200.921	179.254	198.91	210.756	194.011	207.87	175.94	193.631	197.038	188.329	186.652	202.098	214.504	192.776	185.763	173.124	192.336	161.19	208.357	197.599	96.8841	96.976	97.6256	95.3745	101.537	117.853
ENSG00000089060	SLC8B1	30.8105	35.57	45.171	47.9562	51.4141	47.3312	38.027	34.2609	31.6322	39.8508	33.1069	25.877	23.86	29.3376	25.9582	31.5469	19.6193	34.8832	30.4841	32.0961	29.3195	28.8221	61.9031	40.3932	40.1966	39.3665	34.6571	25.0986	23.3696	24.5041
ENSG00000089063	TMEM230	358.933	349.03	304.311	350.679	353.458	344.354	383.934	341.331	382.648	380.142	410.437	353.251	348.106	362.266	415.112	372.504	390.998	414.823	325	303.941	314.042	359.667	268.646	289.061	376.696	365.674	343.601	427.463	400.468	437.261
ENSG00000089091	DZANK1	52.6033	64.4706	48.3329	48.9553	51.4141	69.4863	53.6278	53.9869	68.5364	58.1607	62.4301	58.0002	57.7259	68.139	50.6804	52.2496	52.3182	55.9968	57.1577	59.3291	62.1573	40.5645	51.3342	37.1181	19.583	23.0438	23.4302	19.0749	12.8936	14.0023
ENSG00000089094	KDM2B	376.623	362.369	402.347	370.19	388.596	388.858	509.013	630.794	540.75	583.604	470.425	567.465	538.296	541.075	488.262	497.694	510.758	511.37	478.39	493.988	542.941	513.829	755.632	568.367	477.5	476.899	508.519	368.185	379.398	364.329
ENSG00000089123	TASP1	45.8401	46.6856	45.6227	45.958	46.6786	47.3312	34.1268	33.2227	64.3188	43.082	34.9987	38.3694	38.4839	32.1768	39.5554	29.5753	39.2386	33.9653	40.963	27.233	28.1467	39.497	28.6868	40.3932	39.1659	45.1275	54.1823	45.1774	50.7684	33.839
ENSG00000089154	GCN1	708.642	680.276	786.878	799.27	744.828	710.976	923.375	1057.94	792.913	817.481	819.158	884.28	831.253	894.325	822.011	752.197	757.306	839.952	887.85	929.813	919.459	895.62	1194.28	1036.03	797.747	866.064	834.211	769.02	772.809	782.964
ENSG00000089157	RPLP0	3354.44	3521.35	3757	3565.53	3555.11	3529.95	3859.08	4395.41	3148.4	3667.02	3552.19	3574.59	3517.22	3440.79	3480.85	3995.24	3564.1	4040.73	3900.15	4206.99	4003.58	4024.79	5187.03	4754.29	3842.91	3900.24	3903.98	3601.64	3787.4	3718.56
ENSG00000089159	PXN	236.431	227.385	257.807	297.466	338.257	270.387	310.136	323.369	250.374	245.94	269.379	269.645	266.88	297.67	267.878	273.954	275.69	322.529	258.017	333.958	346.691	292.009	369.869	321.011	512.955	497.435	503.251	858.844	871.486	825.177
ENSG00000089177	KIF16B	71.3903	80.0325	80.4044	66.9388	63.5912	71.5003	59.4782	38.4138	55.8835	67.8541	78.5106	55.3232	58.4956	63.4071	64.2776	36.4761	43.1625	44.981	47.6315	63.2196	49.2568	59.7792	25.6671	48.0352	72.1477	81.6135	82.9818	163.643	141.829	135.356
ENSG00000089195	TRMT6	193.881	175.627	179.329	150.862	142.065	154.078	218.412	151.578	204.555	240.182	206.209	192.739	196.268	234.701	206.43	212.942	210.58	225.823	203.863	247.043	209.928	246.589	123.806	167.031	333.941	246.76	287.996	168.662	185.345	196.033
ENSG00000089199	CHGB	47.343	44.4625	42.009	23.9781	23.6776	26.1832	32.1767	34.2609	28.469	33.3885	27.4314	33.0155	29.2478	30.284	33.3749	40.4195	22.2352	50.4889	41.9157	45.7126	31.6651	24.5522	33.2163	32.7512	11.3375	23.0438	10.7388	29.1143	29.8164	29.1715
ENSG00000089220	PEBP1	1389.88	1251.62	1405.02	1231.89	1320.96	1346.14	1725.57	1878.82	1598.29	1543	1542.63	1540.66	1524.22	1398.55	1206.44	1329.7	1467.24	1553.82	1457.12	1467.46	1550.42	1308.53	1720.92	1571.96	858.487	859.152	878.102	668.461	643.806	613.651
ENSG00000089234	BRAP	241.976	213.42	229.921	206.811	230.687	207.452	220.362	188.954	224.589	194.946	192.966	196.308	197.038	204.417	181.708	218.857	207.965	235.003	236.252	213.974	202.891	188.945	208.357	246.726	216.443	211.235	228.444	210.828	186.957	192.532
ENSG00000089248	ERP29	568.534	493.534	599.92	557.759	568.641	594.413	491.692	582.257	476.368	485.601	476.841	538.541	533.678	467.062	461.067	562.611	426.063	542.596	521.762	598.798	566.364	508.465	728.144	688.253	518.167	522.93	501.378	638.712	597.945	671.731
ENSG00000089250	NOS1	100.698	77.8093	79.049	51.9526	64.9441	73.5145	61.4283	64.369	42.1763	42.0049	54.8628	58.0002	43.8717	48.2651	46.9721	25.6319	44.4704	33.0473	31.4368	35.0139	32.8378	30.9571	28.6868	39.3015	15.4602	17.2829	18.5489	19.0749	20.9521	28.0047
ENSG00000089280	FUS	1556.56	1206.16	1648.51	1804.26	1715.36	1851.77	2211.53	2426.1	1938.42	2159.44	2119.29	2342.67	2334.86	2302.77	2273.17	2598.6	2207.48	2374.62	2889.17	2946.53	2886.07	2583.52	3246.39	2942.43	2091.3	2099.02	2023.06	1897.48	1799.01	1849.16
ENSG00000089289	IGBP1	115.728	133.388	133.706	138.873	148.154	125.881	152.048	147.426	139.182	134.631	122.023	140.093	135.463	168.455	121.139	132.103	130.796	159.611	139.041	138.067	138.204	114.221	181.18	176.856	159.653	153.625	156.689	264.037	278.017	255.384
ENSG00000089327	FXYD5	72.1418	42.2394	73.6287	80.9261	72.3857	75.5285	70.2037	66.4454	56.9379	70.0082	50.1333	60.6771	62.344	69.0854	81.5831	68.0231	40.5466	78.0283	65.7314	63.2196	55.1207	57.6442	87.5702	58.9522	24.7364	32.6454	21.9658	16.0631	18.5345	11.6686
ENSG00000089335	ZNF302	370.063	451.294	362.188	363.187	405.562	394.495	234.826	116.056	306.832	365.12	405.628	326.586	341.751	277.288	369.596	394.893	427.672	339.653	287.296	281.483	232.927	335.191	76.6404	134.28	343.041	307.747	337.786	337.897	402.666	352.185
ENSG00000089351	GRAMD1A	239.721	262.329	256.12	291.734	311.867	293.05	278.865	294.851	258.329	272.494	232.694	247.17	234.752	243.218	247.221	198.154	168.726	185.432	184.81	201.33	211.1	182.54	264.22	251.093	130.897	129.621	145.95	177.698	184.539	217.036
ENSG00000089472	HEPH	355.449	344.584	366.788	402.632	474.904	457.199	357.844	361.297	307.887	368.351	368.905	356.032	325.574	409.78	325.096	325.328	283.826	281.82	408.678	382.235	387.018	414.184	469.557	473.802	474.113	499.282	467.627	1040.08	1099.18	1063.01
ENSG00000089486	CDIP1	237.467	215.643	224.952	200.816	215.127	217.522	204.761	231.521	199.283	190.638	172.156	202.554	167.79	173.187	194.069	186.324	146.491	175.334	195.289	188.686	175.917	187.877	262.71	228.167	133.989	128.661	143.022	93.3667	106.372	113.186
ENSG00000089597	GANAB	1221.91	1122.68	1287.37	1265.84	1317.15	1303.13	1285.12	1476.34	1012.23	1206.3	1270.36	1301.87	1296.91	1359.93	1248.47	1267.79	1130.07	1231.01	1287	1324.69	1456.59	1263.91	1680.44	1541.49	1473.88	1503.6	1442.43	1853.29	1824.43	1834.3
ENSG00000089639	GMIP	56.3607	51.1319	54.6569	37.9653	46.6786	56.3947	51.6778	59.1779	47.4483	33.3885	55.8087	42.8309	44.6414	41.6405	33.3749	60.1364	44.4704	50.4889	42.8683	47.6578	65.6757	49.1043	73.9817	67.6859	37.1045	41.2868	40.0265	47.1853	37.8749	49.0082
ENSG00000089682	RBM41	135.266	148.949	111.121	120.89	94.7102	148.036	57.5281	42.5666	94.8966	99.0886	127.698	97.2618	120.07	87.0665	117.43	87.7399	108.56	68.8485	77.163	58.3565	73.8851	130.233	48.3146	46.9435	142.234	155.546	132.283	137.54	121.683	107.351
ENSG00000089685	BIRC5	514.762	591.351	570.058	591.46	614.943	596.174	664.986	771.395	644.244	689.31	688.627	728.122	727.348	635.964	666.261	688.117	721.991	675.632	683.99	704.169	742.369	697.068	921	877.736	658.605	685.554	705.832	463.823	473.034	448.075
ENSG00000089693	MLF2	524.531	537.997	575.482	501.542	514.818	574.018	619.159	668.606	512.441	589.145	562.817	607.664	591.112	578.233	552.539	620.095	550.649	633.407	623.019	640.948	562.934	581.779	788.132	753.276	570.996	597.217	599.42	601.363	558.454	653.444
ENSG00000089723	OTUB2	26.6354	24.4544	29.7184	25.3288	27.8645	33.3178	19.6365	22.7629	22.0747	18.3098	16.2558	27.8633	16.2094	19.9876	20.8038	17.9917	7.4835	17.8836	15.5967	22.37	21.5205	16.6217	24.2011	26.6712	13.6564	14.4024	15.2979	17.5797	18.1846	9.06095
ENSG00000089737	DDX24	685.012	751.416	726.443	688.019	687.874	748.151	794.532	1005.06	794.036	800.249	870.061	885.862	801.959	855.41	761.653	818.987	812.604	759.646	829.384	874.375	832.263	804.275	963.227	918.748	644.95	673.071	671.987	543.624	522.54	539.364
ENSG00000089775	ZBTB25	120.56	122.272	91.6075	100.908	86.5922	111.909	81.466	66.9706	112.272	68.51	66.2137	72.3713	68.5633	74.7647	55.0538	65.717	60.1659	71.5466	63.8261	60.8255	70.5383	79.7175	31.7064	49.5587	71.64	97.5115	88.3565	211.265	209.864	260.734
ENSG00000089818	NECAP1	136.773	146.726	143.644	152.864	140.048	138.976	140.407	147.426	118.093	105.551	107.834	142.772	140.851	120.19	114.958	138.018	151.723	149.663	156.231	168.849	177.09	134.503	164.572	188.866	155.633	152.665	149.367	108.264	103.955	101.517
ENSG00000089820	ARHGAP4	91.8369	80.4867	87.256	110.457	88.4611	86.6911	60.4532	66.7484	50.7977	62.2032	50.1337	70.1821	56.9594	51.053	54.9527	54.2213	62.2395	57.8333	67.7018	54.4661	57.4554	44.8344	69.5044	54.6026	56.9831	41.2904	43.9316	48.4105	54.4323	50.2246
[truncated: 14,670 more rows]

## Sheet: B - d4 amnion 1813 UP genes
Gene name	P-value (48-hr amnion- vs. pluripotent-cyst)	FDR step up (48-hr amnion- vs. pluripotent-cyst)	Ratio (48-hr amnion- vs. pluripotent-cyst)	Fold change (48-hr amnion- vs. pluripotent-cyst)	LSMean(48-hr amnion) (48-hr amnion- vs. pluripotent-cyst)	LSMean(48-hr pluripotent-cyst) (48-hr amnion- vs. pluripotent-cyst)
[truncated: 1,813 more rows]

[truncated: 3 more sheets: C - d4 amnion 2088 DOWN genes, D - GO BP for UP genes, E - GO BP for DOWN genes]
