# Supplementary material for: Temporally resolved early bone morphogenetic protein-driven transcriptional cascade during human amnion specification
Source: eLife. 2024 Jul 25;12:RP89367. doi: 10.7554/eLife.89367 (PMC11272160; doi:10.7554/eLife.89367)
Supplement: Supplementary file 2. — An excel file containing temporally resolved gene lists: (A) immediate (0.5 hr and 1 hr, 57 genes); (B) early (3 hr and 6 hr, 135 genes); (C) intermediate-1 (12 hr, 81 genes); (D) intermediate-2 (24 hr, 642 genes); (E) late (48 hr, 909 genes). Genes that showed significant upregulation compared to the previous timepoint (e.g. 0.5 hr compared to 0 hr, 3 hr compared to 1 hr) were retained. Duplicated genes found in the list from earlier timepoint lists are removed. For example, GATA3 is significantly upregulated throughout the time-course, but is only included in the immediate category. Genes with averaged normalized counts <100 were excluded. [file elife-89367-supp2.xlsx]

## Sheet: A - immidiate genes
Gene name	EME2	HES1	SOCS3	BAMBI	ID4	ID2	ID1	ID3	ZNF181	ARRDC3	ZBTB1	CDKN1C	HAPLN1	PRTG	AHNAK	PRODH	MXRA5	RGS5	DACT1	ACTC1	HEY1	AMOTL2	SYDE2	SERPINB9	RHOB	GATA3	NTS	THBS1	LEFTY1	SKIL	KLF10	ADM	FOS	CCNE2	BCOR	ZFP36L2	BCL11A	CCN2	CCN1	IRX2	SERTAD4	SGK1	NFKBIA	SMAD7	GATA2	TIPARP	GREM1	FGFR3	CBLN1
0-hr	-0.937142	-0.909914	-0.860481	-0.988015	-1.17352	-1.24733	-1.20021	-1.162	-1.22484	-1.06972	-0.973175	-0.63074	-0.404037	-0.429898	-0.445433	-0.453757	-0.404615	-0.408558	-0.539472	-0.624857	-0.645968	-1.05932	-0.838002	-0.651638	-0.590551	-0.762404	-0.555258	-0.250733	-0.088606	-0.552117	-1.15737	-0.508088	-0.613542	-0.683343	-0.634912	-0.452386	0.0990392	-0.363471	-0.461761	-0.215242	-0.680209	-0.5709	-0.894438	-0.73679	-1.05941	-0.588354	-0.851065	-0.994697	-0.682968
0-hr	-0.670048	-0.947989	-0.824672	-0.998494	-1.18721	-1.27964	-1.18558	-1.13911	-1.59937	-1.41086	-1.87257	-0.629061	-0.406369	-0.441177	-0.447865	-0.402167	-0.393991	-0.45282	-0.462216	-0.625821	-0.607627	-1.00634	-0.94724	-0.648504	-0.588114	-0.756633	-0.592087	-0.0989389	0.254817	-1.18336	-1.14775	-0.638047	-0.703302	-0.77667	-0.458108	-0.416557	-0.331629	-0.199715	0.0132988	-0.380722	-0.66779	-0.585827	-0.805552	-0.627695	-1.04389	-0.955063	-0.849665	-0.926551	-0.60648
0-hr	-1.48832	-0.872598	-0.892627	-0.971094	-1.15433	-1.25155	-1.20169	-1.18102	-0.628612	-1.23302	-0.422491	-0.571455	-0.402871	-0.421457	-0.446787	-0.476608	-0.409924	-0.368638	-0.499852	-0.656382	-0.640227	-1.1152	-0.712933	-0.638763	-0.57549	-0.759465	-0.539376	-0.181397	0.528825	0.539554	-0.83763	-0.415304	-0.539873	-0.286011	-0.725651	-0.401569	-0.0613062	-0.302978	-0.48043	-0.412503	-0.637577	-0.581964	-0.80271	-0.835466	-1.05151	-0.48398	-0.84923	-0.951738	-0.637077
0.5-hr	1.43172	-0.169371	-0.134475	-0.862485	-0.829482	-0.833353	-0.772478	-0.868327	-0.17974	-0.84349	-0.359305	-0.37935	-0.402063	-0.425156	-0.447102	-0.404192	-0.395721	-0.332307	-0.554164	-0.587169	-0.557173	-0.862993	-0.753494	-0.618147	-0.555846	-0.759418	-0.534653	0.471809	0.669537	0.321837	-1.07663	0.0993589	0.865307	-0.41371	-0.225401	0.0725015	0.534328	0.035563	0.291466	0.182349	-0.671593	-0.532759	-0.696639	-0.58343	-0.890721	-1.11557	-0.776583	-0.880811	-0.654926
0.5-hr	0.748046	-0.0138003	-0.191297	-0.881932	-0.833881	-0.854053	-0.810614	-0.818986	-0.0542298	-1.05033	-0.1156	-0.428216	-0.401736	-0.427924	-0.450785	-0.391734	-0.413305	-0.328406	-0.545598	-0.61867	-0.580035	-0.836072	-0.763002	-0.613535	-0.538283	-0.759769	-0.494175	0.126994	-0.016086	0.585875	-1.02211	-0.0409481	0.721118	-0.342692	-0.383353	-0.376026	0.687924	0.0383558	0.11781	-0.172868	-0.663543	-0.528277	-0.655375	-0.530368	-0.953105	-0.792389	-0.819808	-0.92805	-0.598813
0.5-hr	0.971647	-0.102386	-0.0482858	-0.869967	-0.851236	-0.913222	-0.795489	-0.792445	-0.505376	-1.05232	-0.147311	-0.512717	-0.400465	-0.431071	-0.449589	-0.408851	-0.403876	-0.343242	-0.554828	-0.60528	-0.539855	-0.896281	-0.70818	-0.635667	-0.534227	-0.759924	-0.536792	0.111739	0.435183	-0.0659332	-1.12253	-0.01425	0.641672	-0.222667	-0.257511	0.00932082	0.28057	0.229655	0.0334664	0.116837	-0.687476	-0.553891	-0.680083	-0.67039	-0.925974	-0.853322	-0.792909	-0.931453	-0.621811
1-hr	1.18312	2.80469	1.8128	-0.277571	0.358189	0.209333	0.395497	0.302667	0.705269	-0.595461	0.622406	0.320339	-0.40023	-0.427359	-0.438342	-0.346795	-0.393204	-0.336435	-0.273337	-0.451276	-0.171067	0.85745	0.0561276	-0.542218	-0.429138	-0.413271	-0.521637	2.71113	2.55847	2.25893	1.25979	1.47833	1.78067	2.38099	2.32239	2.24234	2.19954	2.28887	2.32508	1.07333	-0.0206191	-0.453523	-0.0628734	1.93177	1.20467	2.79445	0.880593	-0.0463552	-0.00504045
1-hr	1.09186	2.55664	1.75202	-0.148634	0.37899	0.393713	0.396803	0.259511	-0.43896	-0.572923	0.653961	0.372265	-0.179449	-0.178002	-0.206097	-0.14116	-0.123396	-0.128442	-0.101695	-0.279733	0.0529538	1.32298	0.12415	-0.37995	-0.304825	-0.24091	-0.333523	2.2293	2.31977	1.21658	1.57162	1.38816	2.4589	2.00775	2.09199	1.96737	1.9439	1.76267	2.3203	1.47992	-0.0630012	-0.375688	0.264845	2.04892	0.928241	1.95545	0.965966	-0.0537909	-0.133736
1-hr	0.611244	2.27097	1.93747	-0.280554	0.510879	0.368282	0.449814	0.367209	0.543736	-0.698384	1.11685	0.299646	-0.401737	-0.427335	-0.429065	-0.316308	-0.393568	-0.308163	-0.323848	-0.436863	-0.169406	0.896614	0.0495891	-0.56585	-0.398878	-0.430183	-0.495653	2.93833	2.16509	2.67456	1.57329	1.9225	2.49335	3.01537	2.42935	2.18378	2.37956	2.3384	2.43681	1.39348	0.102965	-0.414882	0.0638381	1.7557	1.31727	2.31436	1.29561	0.0458586	-0.0191617
3-hr	0.947795	-0.241791	-0.333677	0.0322293	0.360538	0.208868	1.11306	0.888061	0.575971	0.835972	0.387003	-0.141675	-0.404594	-0.41461	-0.42629	-0.341646	-0.364989	-0.331252	-0.482394	-0.0825708	-0.284242	-0.988394	-0.135401	-0.349164	-0.433874	-0.421013	-0.516589	-0.0935441	0.912633	0.710483	0.602604	0.549943	0.820342	1.14414	1.16738	0.575303	0.58953	-0.341878	-0.330887	-0.782336	0.08554	-0.308332	-0.376503	0.0226526	0.199441	0.0031554	2.33376	2.02484	1.7782
3-hr	1.55042	0.111276	-0.380023	0.0652661	0.487187	0.214636	1.34468	0.651074	1.77009	0.788311	0.819587	0.292364	-0.399578	-0.407913	-0.419768	-0.365223	-0.350281	-0.371221	-0.515758	-0.20407	-0.29443	-1.02107	-0.00492663	-0.384595	-0.455478	-0.352887	-0.506654	-0.438571	0.594856	1.50009	0.843418	0.81572	0.341686	1.33557	1.32174	1.05183	0.636839	-0.546598	-0.833279	-0.75387	0.100936	-0.377789	-0.480657	0.234114	0.422193	-0.189394	2.16704	2.25989	1.49886
3-hr	0.376445	0.053055	-0.220606	0.00528736	0.319014	0.168119	1.10355	1.03229	0.631805	0.877426	0.0721622	0.140083	-0.404963	-0.420589	-0.427413	-0.354859	-0.376344	-0.346078	-0.54877	-0.136187	-0.271004	-0.932607	-0.362921	-0.395852	-0.462016	-0.430157	-0.51423	-0.349885	0.417265	0.0790694	0.307884	0.756673	0.137415	0.756925	1.21117	0.758517	0.684986	-0.561112	-0.476328	-0.779398	0.0553844	-0.326174	0.0889833	0.148283	0.555993	0.484963	1.87903	1.74483	1.60573
6-hr	1.75476	0.148322	-0.176013	0.340982	0.52429	0.44039	0.988762	0.90223	-0.715368	-0.0821543	-0.249544	-0.163324	-0.402883	-0.409666	-0.382359	-0.423308	-0.315086	-0.368894	-0.204009	0.266905	-0.00458148	-0.595694	-0.0820459	-0.367383	-0.447092	-0.0794519	-0.455122	-0.720602	-0.960471	-0.384221	0.830476	1.02735	0.262807	0.315213	0.109625	0.544061	0.590579	0.241791	0.524353	-0.915932	-0.0116998	-0.156684	0.0468192	0.674043	0.275212	0.102757	0.9453	1.14803	1.41569
6-hr	0.893567	-0.0882959	-0.222397	0.314346	0.309908	0.315453	1.02749	1.00612	-0.392529	0.0371455	-0.165012	-0.215029	-0.407831	-0.418017	-0.38064	-0.325524	-0.299634	-0.379724	-0.198746	0.220856	0.0569734	-0.49174	-0.25618	-0.356811	-0.404953	-0.0428645	-0.424237	-0.739516	-0.88966	-0.867898	0.634359	0.883233	0.135332	0.152336	0.209168	0.493891	0.293425	0.128545	0.697623	-0.911773	-0.0414516	-0.162048	0.135394	0.572845	0.348086	0.217332	0.786809	1.19896	1.66501
6-hr	0.761189	-0.176488	0.0167045	0.302443	0.348769	0.38537	0.983135	0.957944	-0.89487	-0.017999	-0.190867	-0.143328	-0.404392	-0.409351	-0.357158	-0.360623	-0.273933	-0.419619	-0.243499	0.28022	0.0260473	-0.564017	-0.34157	-0.363092	-0.478264	-0.0397772	-0.49322	-0.868088	-0.803559	-0.942902	1.25696	1.06134	0.39406	-0.448986	0.375005	0.60221	0.723598	0.0366429	0.753308	-1.02395	-0.189008	-0.130512	0.14351	0.917087	0.347729	0.26041	0.9732	1.28472	1.19376
12-hr	0.620161	0.0789563	-0.562693	0.303251	0.570183	0.923533	0.820116	1.25166	-0.236192	-0.212474	-0.367433	-0.506504	-0.401363	-0.376311	-0.32436	-0.341307	-0.274416	-0.346197	0.113814	-0.00416616	-0.134163	0.0917568	-0.238335	-0.0704108	-0.398413	0.301085	0.337858	-0.580702	-0.960471	0.208176	0.982801	0.151048	0.0195881	-0.288165	-0.310305	0.541534	-0.0688164	-0.622979	-0.0170733	-0.862191	0.287744	-0.135403	0.32316	0.529451	0.298478	0.414217	-0.0416622	0.591049	0.999339
12-hr	-0.029498	0.515145	-0.264925	0.494823	-0.192777	0.115651	1.66054	2.06037	-1.85749	-1.36526	-2.09355	-0.371174	-0.407778	-0.421416	-0.289989	-0.327374	-0.238127	-0.476063	0.194526	0.30326	0.0221925	0.45985	-0.79998	-0.116268	-0.297383	0.422064	-0.366503	-0.924516	-0.960471	-1.41516	0.921766	0.757579	0.420691	-0.746307	0.139812	0.718914	-0.308094	-0.222708	0.157237	-0.848788	-0.166991	-0.0820729	0.665588	1.23391	0.70295	-0.645056	-0.313952	0.842714	1.42754
12-hr	0.382695	0.414361	-0.246105	0.59226	-0.0477402	0.551241	1.35294	1.93868	-1.41419	-1.21744	-1.56535	-0.444561	-0.406184	-0.425229	-0.309031	-0.376101	-0.219021	-0.454033	0.316369	0.177224	0.0338439	0.271842	-0.785949	-0.0410241	-0.328267	0.412712	-0.304946	-1.05607	-0.960471	-1.42946	0.811624	0.494414	0.0484299	-0.703979	0.0569559	0.775725	-0.153463	-0.470953	-0.0307383	-0.920133	-0.12584	-0.0943465	0.57437	0.916783	0.43903	0.0836292	-0.320456	0.85083	1.51065
24-hr	-0.954069	0.53683	-0.324382	1.46916	2.01553	1.59674	0.579662	0.460752	-0.484491	-0.560385	1.26148	-0.433187	0.312386	0.297654	0.443039	0.142065	-0.140873	-0.0611089	-0.391007	0.00410787	-0.0148027	1.5345	1.90506	1.88093	2.85538	1.05878	1.11407	-1.14905	-0.960471	-0.0151011	-0.570078	-1.58006	-1.20191	-0.199438	-0.733091	-0.803325	-1.02678	-0.800607	-0.76806	2.35314	2.92668	3.03964	2.90682	0.619713	1.95969	0.687639	0.0855516	0.107179	-0.713434
24-hr	-1.20308	0.576369	-0.533096	1.19253	1.82032	1.37679	0.552341	0.813443	0.0891527	-0.019983	1.07535	-0.469021	0.159851	0.362966	0.326123	0.0151871	-0.122541	-0.0816381	-0.508886	-0.159287	0.0150971	1.26209	1.13754	1.76142	1.93842	1.09189	1.20335	-0.539418	-0.930051	-0.234396	0.17409	-1.56546	-1.0628	-0.31297	-0.680932	-0.884588	-1.09388	-1.05409	-1.16116	2.31188	2.76428	2.53001	2.07224	0.41532	1.77628	1.16292	-0.13581	0.0271409	-0.558505
24-hr	-0.127452	0.451243	-0.185771	1.43202	2.09712	1.4663	0.59786	0.711475	-0.560357	-0.567138	1.11503	-0.343235	0.280572	0.379358	0.411533	0.197049	-0.149961	-0.0935287	-0.516584	-0.0329949	0.0675601	1.54249	1.82946	1.85141	2.34533	1.0735	1.09673	-0.546734	-0.960471	-0.0674316	-0.164459	-1.53931	-1.19225	-0.318249	-0.667098	-0.808349	-1.14505	-0.961845	-1.01982	2.17797	2.71884	2.8194	2.66685	0.630233	1.95762	0.821868	0.130524	0.15741	-0.625589
48-hr	-0.417133	-0.673755	1.94044	1.93843	0.876194	1.43462	-0.0558864	-0.934679	0.18022	1.97244	1.66228	2.88497	2.91719	2.99	2.86882	2.99295	3.06462	3.01812	2.75058	2.78537	2.87421	1.59043	1.86286	2.01471	1.33974	2.45567	2.35278	-0.383749	-0.468392	-1.05217	-1.56661	-1.59205	-0.118669	-0.737483	-1.2081	-1.13046	-1.47189	-1.47182	-1.16843	-0.11092	-0.263833	0.477114	0.162937	-0.402074	-0.269846	-0.429143	-0.560218	-0.403461	-0.888064
48-hr	-0.505667	-0.827928	1.79656	1.9556	0.937961	1.58827	-0.00561899	-0.936194	-0.424675	1.89272	1.87897	2.83821	2.96461	2.88623	2.76382	2.91155	2.78122	3.0065	2.72072	2.62769	2.89619	1.51067	2.19657	2.14443	1.4479	2.51769	2.59285	-0.423654	-0.412595	-1.02413	-1.66567	-1.58233	-0.203944	-0.591616	-1.22935	-1.15015	-1.28912	-1.50011	-1.32998	-0.154805	-0.215434	0.479284	0.316682	-0.326174	-0.104524	-0.47474	-0.629811	-0.362577	-0.866276
48-hr	-0.37988	-0.73231	2.07063	1.84477	0.779185	1.21306	-0.0869983	-0.839356	-0.386061	1.77106	1.295	2.6913	2.7847	2.72586	2.9335	2.82221	2.95848	2.76384	3.12513	2.89765	2.72232	1.86035	2.17573	1.94374	1.45738	2.21698	2.64529	0.0728085	-0.394215	-1.02993	-1.63484	-1.52279	-0.449934	-0.694578	-1.09172	-1.27552	-1.48888	-1.47662	-1.21968	0.0504028	-0.167157	0.42594	0.0150227	-0.374909	-0.185371	-0.716938	-0.457719	-0.478864	-0.84882
[truncated: 8 more columns]

## Sheet: B - early genes
Gene name	MVK	HNRNPUL2-BSCL2	GALNT10	RAB15	ITGA9	ZFHX3	ELMO1	TRIML2	IGDCC3	PDZD2	RYR2	MAP3K1	MBOAT2	NCOA1	ABHD5	ATP9A	PDGFRB	BMP7	SDK2	MMP2	FAM20A	TYRO3	SAMD1	KCNMB4	CRIP2	FAM155A	STIL	NOG	GRIK3	EPB41L3	MSX2	TFAP2A	FBN2	TFAP2C	MBNL3	NDRG2	FLRT2	NIPA1	FZD1	HLA-DQB1	TSPAN18	PRKD1	PINK1	COL9A2	KAT7	IQSEC2	GDF3	DTNA	DOK5
0-hr	-0.18762	-1.47781	-0.600799	-0.785004	-0.452489	-0.619446	-0.694319	-0.621179	-0.690098	-0.535698	-0.651864	-0.977664	-0.847916	-1.04925	-1.04419	-0.582593	-1.07549	-0.744056	-0.797679	-0.634902	-0.838752	-0.960565	-0.574766	-0.731317	-0.829025	-0.648068	-0.614385	-0.74253	-0.542644	-0.727751	-0.681142	-0.702906	-0.667817	-0.665954	-0.606052	-0.677533	-0.53027	-0.681294	-0.697665	-0.629928	-0.740617	-0.766889	-0.947774	-0.786307	-0.48653	-0.134931	-0.194075	-0.497009	-0.687597
0-hr	-0.194072	-0.817148	-0.807616	-0.768074	-0.422172	-0.675596	-0.531459	-0.595907	-0.677103	-0.612656	-0.733592	-1.41339	-1.14187	-1.47813	-1.4481	-0.787936	-1.01577	-0.610765	-0.714701	-0.576624	-0.793319	-0.746203	-0.585461	-0.673537	-0.865301	-0.82622	-0.767199	-0.72845	-0.472136	-0.781048	-0.673645	-0.703138	-0.669073	-0.689945	-0.682584	-0.510833	-0.669458	-0.881779	-0.682189	-0.595457	-0.770466	-0.735412	-0.741811	-0.801903	-0.320955	0.0727584	-0.124994	-0.486072	-0.721433
0-hr	-0.535443	-0.772661	-0.900424	-1.0266	-0.498299	-0.637477	-0.707834	-0.632198	-0.800934	-0.484048	-0.764301	-0.807668	-0.53808	-0.901111	-0.560826	-0.909453	-1.07121	-0.750449	-1.02426	-0.865857	-0.885419	-1.15235	-0.746	-0.580894	-0.812257	-0.439379	-0.594818	-0.727954	-0.593865	-0.718856	-0.680996	-0.698484	-0.736004	-0.689055	-0.540796	-0.740995	-0.504163	-0.68065	-0.687141	-0.652597	-1.01459	-0.792658	-0.876642	-0.81261	-0.621753	-0.175674	-0.212275	-0.447217	-0.576362
0.5-hr	-0.545624	-0.973875	-0.980335	-0.747303	-0.452848	-0.641565	-0.770215	-0.594389	-0.820381	-0.5977	-0.553382	-0.833364	-0.774235	-0.646199	-0.383858	-1.19442	-0.830825	-0.739583	-0.864597	-0.776636	-0.81064	-0.950459	-0.860775	-0.728262	-0.825727	-0.397098	-0.746086	-0.665672	-0.591573	-0.749712	-0.677144	-0.703138	-0.788308	-0.69321	-0.522432	-0.526627	-0.505395	-0.677415	-0.610529	-0.598886	-0.693522	-0.741727	-1.0433	-0.796254	-0.33969	-0.320633	-0.111722	-0.483628	-0.566367
0.5-hr	-0.909842	-0.59171	-0.953034	-0.795297	-0.568181	-0.705659	-0.649509	-0.559936	-0.738644	-0.641543	-0.40478	-1.00652	-0.610286	-0.725588	0.172136	-0.589702	-1.07991	-0.790988	-0.873659	-0.638471	-0.821909	-1.11727	-0.861177	-0.99124	-0.879518	-0.471009	-0.605427	-0.69438	-0.616316	-0.675455	-0.677819	-0.701052	-0.818378	-0.70713	-0.486995	-0.607312	-0.455626	-0.731067	-0.632411	-0.638	-0.932223	-0.759868	-0.710654	-0.815955	-0.4501	-0.317181	-0.232721	-0.505652	-0.616849
0.5-hr	-0.198317	-0.341897	-0.812722	-0.736157	-0.484888	-0.676215	-0.6931	-0.602738	-0.786623	-0.524006	-0.574431	-1.07225	-0.827835	-0.837646	-0.569457	-1.08292	-1.1967	-0.74155	-0.761097	-0.599139	-0.765025	-0.911788	-0.776128	-0.865032	-0.817963	-0.626029	-0.605186	-0.686516	-0.602032	-0.775127	-0.663831	-0.703138	-0.797979	-0.672067	-0.586776	-0.4894	-0.517645	-0.815757	-0.628783	-0.597328	-0.735571	-0.756068	-0.819042	-0.755112	-0.391381	-0.152201	-0.103011	-0.446863	-0.651154
1-hr	-0.504526	-0.900373	-0.984001	-0.37296	-0.572811	-0.61102	-0.630963	-0.44866	-0.667479	-0.66216	-0.372602	-0.581261	-0.764642	-0.750066	0.0565539	-1.04525	-0.948217	-0.718625	-0.978394	-0.554406	-0.68517	-0.528352	-0.636141	-0.617872	-0.555368	-0.681701	-0.524055	-0.424796	-0.60206	-0.771635	-0.549941	-0.626847	-0.72552	-0.578495	-0.493226	-0.463125	-0.405541	-0.591192	-0.369533	-0.626331	-0.681249	-0.778094	-0.785368	-0.703572	-0.282078	-0.140319	-0.0249351	-0.541437	-0.587595
1-hr	-0.641616	-0.876768	-0.736845	-0.441322	-0.383754	-0.443745	-0.224638	-0.340379	-0.326291	-0.279808	-0.0709706	-0.152955	-0.635211	-0.835452	-0.455902	-1.09729	-0.79929	-0.737063	-0.838335	-0.485249	-0.738388	-0.57904	-0.43712	-0.776231	-0.642662	-0.598975	-0.640552	-0.429393	-0.564278	-0.546882	-0.381064	-0.445015	-0.581326	-0.35697	-0.424105	-0.53558	-0.501131	-0.455753	-0.295756	-0.531977	-0.715974	-0.630085	-0.726389	-0.572053	-0.353775	-0.246986	-0.267798	-0.549814	-0.571528
1-hr	-0.321059	-0.62213	-0.828355	-0.527165	-0.571644	-0.649515	-0.69275	-0.513093	-0.682599	-0.662393	-0.426395	-0.533501	-0.766336	-0.427955	-0.194447	-0.658195	-0.887833	-0.799269	-1.03198	-0.380778	-0.784397	-0.661744	-0.635252	-0.870976	-0.582354	-0.438746	-0.703758	-0.487061	-0.629202	-0.73434	-0.584263	-0.608256	-0.769556	-0.590605	-0.494856	-0.523169	-0.572787	-0.554904	-0.322794	-0.575777	-0.93517	-0.824438	-0.925523	-0.675747	-0.255175	-0.135187	0.0802407	-0.501626	-0.488876
3-hr	0.809341	-0.475501	-0.592378	0.36917	-0.651133	-0.2349	-0.435889	-0.497817	-0.237313	-0.25869	-0.621163	-0.0845466	0.307784	-0.310185	0.60725	0.60951	-0.391799	-0.503769	-0.949388	-0.312885	-0.28873	0.194253	0.0181006	0.0241879	0.360065	-0.658554	-0.116795	-0.273547	-0.444783	-0.553698	-0.526097	-0.535342	-0.562609	-0.56945	-0.452925	-0.217362	-0.381496	-0.385172	-0.24377	-0.438842	-0.680338	-0.608555	-0.281591	-0.179461	0.278917	0.248549	0.36892	-0.255659	-0.335682
3-hr	0.208514	-0.972828	-0.527768	0.408931	-0.668211	-0.104824	-0.503718	-0.567278	-0.196265	0.0458786	-0.822095	-0.0309667	0.593021	0.572865	0.916047	0.883443	-0.427614	-0.469138	-0.87593	-0.154721	-0.31274	-0.37197	0.172175	0.105324	0.614536	-0.623147	-0.162134	-0.237995	-0.466737	-0.511219	-0.5623	-0.52527	-0.45701	-0.498326	-0.422169	-0.533135	-0.36388	-0.317518	-0.0991942	-0.577859	-0.485752	-0.652563	-0.378204	-0.083709	-0.0242064	0.328203	0.0368848	-0.422081	-0.531289
3-hr	0.632235	-0.923559	-0.601902	0.483663	-0.578942	-0.209053	-0.609136	-0.581907	-0.166222	-0.355095	-0.711672	0.017232	-0.253343	0.0861743	0.847513	0.148862	-0.593421	-0.375021	-1.00281	-0.130783	-0.505927	0.110754	0.0747696	0.446774	0.521242	-0.740565	-0.0226727	-0.308069	-0.517164	-0.517533	-0.527527	-0.559791	-0.635557	-0.539324	-0.529441	-0.186519	-0.351643	-0.39957	-0.236867	-0.524676	-0.519891	-0.609611	-0.304813	-0.044758	0.23552	0.2363	-0.000430621	-0.355464	-0.27951
6-hr	1.58961	0.628795	0.112448	0.623195	0.109001	-0.127059	0.145758	0.184735	0.0830417	0.0706952	0.807382	0.608531	1.04989	1.49368	1.71379	1.27491	0.363516	0.249058	0.462035	0.619463	0.737069	0.430184	0.604405	0.544865	0.831149	1.0702	0.735152	0.245582	0.297248	-0.0958275	-0.365385	-0.272758	-0.131251	-0.248846	-0.351351	0.0748804	-0.0204899	0.0939854	0.033268	-0.217703	-0.0540694	0.326161	0.273869	0.24464	1.60186	1.25112	1.2522	1.53649	1.00833
6-hr	2.02527	0.602356	0.585332	0.789593	0.0873472	-0.166799	0.167925	0.09211	-0.0102888	-0.0514827	0.556359	0.38186	0.666762	1.21159	1.34421	1.37866	0.666282	0.260613	0.822475	0.740299	0.423258	0.659728	0.847928	0.719021	1.304	1.22993	0.697996	0.198255	0.280494	-0.112722	-0.323639	-0.31098	-0.0883928	-0.323733	-0.415023	0.10983	-0.193861	0.069619	-0.0993179	-0.188938	-0.133389	0.516697	0.77472	0.448951	1.62147	1.56693	1.60577	1.48259	1.09403
6-hr	1.69338	0.615027	0.70031	0.94976	0.0359955	-0.0862646	0.359311	0.193871	0.0104088	0.0119053	0.581683	0.710919	0.691536	1.66088	1.36066	1.7445	0.295405	0.108012	0.722109	0.898505	0.50248	0.93917	0.754145	0.649946	1.47331	1.12285	0.881876	0.238139	0.192558	-0.0113343	-0.346042	-0.296031	-0.0558077	-0.208713	-0.507474	-0.0854139	0.0347712	0.0706522	0.0304533	-0.133794	-0.197058	0.539153	0.466574	0.654695	1.64441	1.53889	0.954285	1.43423	1.18932
12-hr	-0.301785	0.435883	1.2449	0.406611	0.773806	0.0259463	0.11009	0.156652	0.217193	0.0812518	0.524686	0.650229	1.39829	1.87263	1.52804	0.816606	1.85012	1.71033	0.885989	1.25106	1.65726	0.82273	1.09445	1.67912	1.56195	2.11334	1.57596	1.1903	1.00478	0.343677	0.213567	0.539679	0.195837	-0.0473273	0.341577	0.352912	0.170734	0.643673	0.0324382	0.694635	0.532747	0.962603	0.756931	0.7799	1.48485	1.85459	1.92711	2.54219	1.9646
12-hr	0.421224	1.04393	2.13655	1.68848	1.09586	-0.161584	0.44558	0.392307	0.780453	-0.27185	-0.125525	-1.10373	-0.30714	0.0948433	0.0204895	2.06292	2.18374	2.83126	2.22764	2.34799	1.95032	1.87944	1.93882	1.87195	1.63771	1.03136	0.276537	1.65153	1.56736	-0.0825801	0.529172	0.617232	0.589628	0.163605	-0.464433	0.600549	-0.181147	-0.075989	0.216849	1.05313	1.06639	1.36738	1.37872	1.27207	2.34031	2.37856	2.55042	2.23144	2.72545
12-hr	0.128812	1.3655	1.24465	0.998711	1.08183	-0.10235	0.250907	0.369775	0.517018	0.0161898	-0.202458	-0.0544589	0.0476974	0.869478	0.221098	1.37774	1.77057	2.46064	1.75529	2.08097	2.0856	1.7053	2.00042	1.79844	1.71494	1.71719	1.26471	1.70377	1.27418	0.30686	0.534549	0.497915	0.421074	-0.0391782	-0.393781	0.651244	-0.065436	0.174718	0.195098	0.989923	0.90175	1.08776	1.19035	0.599966	2.22349	2.12019	2.26968	1.77405	2.71563
24-hr	0.598963	1.07072	1.39829	1.08044	-0.601693	0.873096	0.528184	0.75098	0.51664	0.107042	0.997821	1.198	2.43668	1.18836	1.18473	0.731381	1.73821	1.15912	1.33516	1.35395	1.67334	1.51719	1.75866	1.81495	1.22731	1.55039	2.30723	2.07164	2.35576	1.42795	1.62565	1.94333	2.10438	2.45244	2.37213	2.83625	2.63876	2.6818	2.82164	2.43195	2.27189	2.11472	2.04952	2.05798	0.0564861	-0.942917	-0.755113	0.252222	0.0039468
24-hr	0.854401	1.18131	0.801216	0.628966	-0.523462	0.849175	0.579351	0.392254	0.750983	0.372209	0.270378	0.933428	1.8592	1.57389	1.55947	1.34024	1.36872	1.39605	1.72925	1.45836	1.27259	1.47591	1.66672	1.60952	1.31357	1.58046	2.27065	2.23172	2.41325	1.43033	1.33916	1.81209	2.14687	1.86372	2.43281	2.04515	2.91909	2.73532	2.47032	2.70187	2.6111	1.93503	1.98283	2.52425	-0.0965731	-0.90707	-0.618203	0.33382	0.281483
24-hr	1.07111	1.72544	0.936694	0.994775	-0.530841	1.00963	0.670406	0.627269	0.570734	0.1521	0.800279	1.18327	2.33115	1.61371	1.1113	0.887895	1.36455	1.12309	1.92593	1.49192	1.26797	1.56128	1.79001	1.59174	1.25068	1.76509	2.14913	2.26244	2.38084	1.45384	1.54516	1.8261	2.25125	2.65424	2.37217	2.93738	2.7622	2.69354	2.97134	2.51378	2.42919	2.07747	2.31964	2.40863	-0.188149	-0.843065	-0.754601	0.360053	0.0553702
48-hr	1.01984	0.988611	1.38211	1.33889	2.54791	2.41692	2.3576	2.7005	2.5289	2.95375	2.48675	2.31765	0.167268	0.039769	-0.175761	-0.447956	0.198378	-0.0961334	0.00684141	-0.127771	0.651753	0.712561	-0.892955	-0.786224	-0.856201	-0.82988	-0.767869	-0.391781	-0.435099	2.25001	2.1328	1.95952	1.4535	1.49291	1.43359	0.311442	0.535428	0.3021	0.250066	0.234422	0.671924	0.81731	0.371269	0.277735	-1.07154	-0.920773	-0.991508	-0.977942	-0.869038
48-hr	0.841119	2.30299	1.50382	1.48354	2.61839	2.73894	2.83693	2.62797	2.66005	2.59562	2.23918	1.94868	0.32921	0.28806	-0.527421	-0.40836	0.220314	-0.0793109	-0.0105165	-0.163743	0.477092	0.64633	-0.614543	-0.614805	-0.902313	-0.722776	-0.693555	-0.241228	-0.564238	2.07615	2.24877	1.82087	1.31099	1.38138	1.39084	0.343105	0.451055	0.494701	0.306171	0.274968	0.493646	0.798886	0.543897	0.308292	-1.08035	-0.958492	-1.0078	-0.957867	-0.788905
48-hr	0.659045	1.24876	1.50369	1.42549	2.61067	2.65385	2.59585	2.50806	2.42109	2.87902	2.53091	2.0687	0.33414	0.233088	-0.333877	-0.265859	-0.065254	0.0743958	0.357685	0.0485422	0.491392	0.694115	-0.741825	-0.623677	-0.828262	-0.653222	-0.704681	-0.347821	-0.617272	2.40553	2.11073	1.58759	1.59823	1.34932	1.30255	0.417093	0.387661	0.291016	0.309899	0.408973	0.50792	0.76911	0.631656	0.298301	-1.07073	-0.948514	-0.969944	-0.92956	-0.815106
[truncated: 86 more columns]

## Sheet: C - intermediate-1 genes
Gene name	KDR	TSHZ3	CCND1	FAM20C	SLC37A1	FAM174B	UBE2QL1	LIMD2	ZSWIM5	PODXL	CDCP1	JADE2	POLE	KCTD2	NHSL1	RASGEF1B	ODF2	LRP10	DNAJC1	SLFN5	TRAF3IP2	SIPA1L2	NUAK1	BMPR2	KRT8	RAB31	HAS2	CHD3	ZNF704	CADM1	ERRFI1	CA2	GRHL2	NAV2	IL6ST	SYT7	CLDN4	FST	GSTO1	BAG3	PLEKHG2	WNT3	THSD7A	CACNG8	PLXND1	PREX1	CRLF1	CADPS	ITPKB
0-hr	-0.11619	-0.883841	-0.370389	-0.125431	-1.43013	-0.677362	-0.996915	-0.813234	-0.558852	-0.0547072	0.0120416	-0.485158	-0.74896	-0.17526	-1.18288	-0.973931	-1.03085	-0.844557	-0.747848	-0.80733	-0.70873	-0.870182	-0.754959	-0.696927	-0.567182	-0.539283	-0.553595	-0.614109	-0.724876	-0.739688	-0.709622	-0.69121	-0.660579	-0.686892	-0.626676	-0.527117	-0.576383	-0.655811	-0.581217	-0.987888	-0.775036	-1.11163	-0.896966	-0.705045	-0.687697	-0.655363	-0.603568	-0.721977	-0.509288
0-hr	0.205438	-0.955748	-0.350674	-0.15042	-0.867341	-0.601503	-0.962958	-0.163732	-0.206167	0.157814	0.0841572	-0.264219	-0.469127	-0.386179	-1.16434	-0.921597	-0.912117	-0.775159	-0.579888	-0.831664	-0.660101	-0.72406	-0.759746	-0.974847	-0.47048	-0.558476	-0.605293	-0.634505	-0.643593	-0.877675	-0.625367	-0.753477	-0.671096	-0.485299	-0.628318	-0.490356	-0.510291	-0.644943	-0.546029	-0.280659	-0.698093	-1.0529	-1.0163	-0.491609	-0.450436	-0.743458	-0.531593	-0.5413	-1.15577
0-hr	-0.31739	-0.62523	-0.559163	-0.326451	-1.8995	-0.81443	-0.990111	-0.57277	-0.590213	-0.175361	-0.561927	-0.947177	-0.892645	-0.893498	-1.51329	-0.860369	-1.06321	-0.726343	-0.736193	-0.792516	-1.05739	-0.926947	-0.899489	-0.552152	-0.539027	-0.536342	-0.524825	-0.68676	-0.785122	-0.763753	-0.718109	-0.743266	-0.76963	-0.714043	-0.467802	-0.522905	-0.618647	-0.676716	-0.539248	-0.555752	-1.38255	-1.14491	-0.634889	-0.519409	-0.592279	-0.94547	-0.771518	-0.515137	-0.817686
0.5-hr	-0.417198	-1.01297	-0.681123	-0.239953	-0.189721	-0.498898	-1.01848	-0.381509	-0.45213	-0.296379	-0.664126	-0.240473	-0.601399	-0.677537	-1.23357	-0.870575	-1.20097	-0.939009	-0.767139	-0.828274	-0.702429	-0.907362	-0.901885	-0.494136	-0.565933	-0.586004	-0.497853	-0.719329	-0.833284	-0.496588	-0.939509	-0.650525	-0.657854	-0.625797	-0.523654	-0.640457	-0.500845	-0.629436	-0.55555	-0.792713	-0.412575	-1.02015	-0.827132	-0.119814	-1.10998	-0.953875	-0.704886	0.179672	-1.20038
0.5-hr	-0.156199	-1.1682	-0.668325	-0.627901	-1.06265	-0.987033	-0.920429	-0.817774	-0.633695	-0.498499	-0.732516	-0.254344	-0.754493	-0.374596	-1.77833	-0.785868	-1.17535	-0.580425	-0.823869	-0.847836	-0.745682	-0.840576	-1.03847	-0.4876	-0.549635	-0.596389	-0.524439	-0.695426	-0.793002	-0.684912	-0.868216	-0.579079	-0.666202	-0.782186	-0.450194	-0.608304	-0.56283	-0.673256	-0.573268	-1.30966	-1.17963	-1.18151	-0.774832	-0.403061	-1.36019	-0.721174	-0.737255	-0.663075	-1.06536
0.5-hr	-0.289674	-1.0265	-0.6594	-0.212655	-0.214634	0.0477866	-0.929662	-0.444152	-0.553299	-0.237464	-0.297885	-0.127262	-0.461207	-0.131058	-1.07435	-0.866607	-1.02549	-0.929038	-0.782142	-0.754923	-0.834488	-0.890058	-0.944396	-0.585819	-0.567309	-0.620902	-0.54376	-0.627443	-0.837359	-0.62317	-0.849455	-0.690977	-0.738974	-0.558603	-0.515652	-0.61586	-0.516353	-0.654137	-0.589688	-0.908569	-0.496544	-1.06579	-0.72321	0.30518	-0.960192	-0.812815	-0.713954	-0.29738	-1.17869
1-hr	-0.527166	0.0804185	0.740745	0.0325379	-0.524863	-0.146452	-0.394834	-0.444456	-0.449204	-0.156426	-0.13241	0.154674	-0.271567	-0.259469	-1.04254	0.203291	-0.785738	-0.738962	-0.870115	-0.881915	-0.853624	-0.934255	-0.357493	-0.720633	-0.561676	-0.633585	-0.534144	-0.62214	-0.69187	-0.580565	-0.437065	-0.699011	-0.645884	-0.530742	-0.543396	-0.589356	-0.591787	-0.630083	-0.568519	-0.499834	0.0739061	-0.341074	-0.533283	0.0384847	-1.16297	-1.07844	-0.633027	-0.623462	-0.867846
1-hr	-0.567229	0.426054	0.454087	-0.180441	-0.542724	-0.0210349	-0.242165	-0.344754	-0.674973	-0.221481	-0.182281	-0.0690858	-0.342096	-0.513461	-1.16492	0.284743	-0.434725	-0.419405	-0.567987	-0.539946	-0.51722	-0.687712	-0.241721	-0.467725	-0.319862	-0.420106	-0.3319	-0.406162	-0.407458	-0.592407	-0.319725	-0.509458	-0.437181	-0.38901	-0.369454	-0.450855	-0.405161	-0.461258	-0.412054	-0.451183	0.151171	-0.107631	-0.75559	0.23034	-1.10006	-0.891624	-0.531687	-0.825252	-1.00632
1-hr	-0.573199	0.102916	0.823193	0.0208666	-0.958806	-0.00910402	-0.395255	-0.107105	-0.756344	-0.232643	0.0887076	0.0212505	-0.746177	-0.244528	-1.49531	-0.131275	-0.899122	-0.721361	-0.9364	-0.756285	-1.04404	-0.956158	-0.548092	-0.572617	-0.559163	-0.677155	-0.546637	-0.746586	-0.757804	-0.723473	-0.455468	-0.699382	-0.663672	-0.583011	-0.509928	-0.644089	-0.604486	-0.715379	-0.575449	-0.924645	0.116112	-0.19421	-0.723327	-0.45645	-1.38916	-0.788194	-0.431898	-0.644555	-1.25525
3-hr	-1.24429	0.597807	1.08859	1.00864	0.153902	1.16677	0.733145	0.353504	-0.0751128	-0.0677084	0.303747	0.546967	0.0197647	0.697115	-0.313408	-0.206939	-0.923099	-0.902709	-0.666933	-0.850208	-0.573683	-0.954373	-0.343718	-0.235529	-0.507191	-0.501127	-0.532705	-0.658698	-0.42574	-0.660715	-0.540028	-0.546736	-0.490808	-0.412965	-0.490281	-0.60842	-0.652158	-0.536706	-0.538532	0.334152	0.698251	0.900384	-0.960654	-0.862325	-0.000382586	-0.304466	-0.338234	-0.312263	0.151288
3-hr	-1.05546	-0.492386	1.56482	1.79133	0.55352	0.702064	0.330755	0.397286	-0.0762057	0.0624409	0.0915106	0.414908	0.722093	0.614199	0.0806315	-0.0377619	-1.02758	-0.893794	-0.665123	-0.871358	-0.640806	-1.0862	-0.281801	0.0538865	-0.515502	-0.482505	-0.5717	-0.597266	-0.272821	-0.49812	-0.530318	-0.562709	-0.652703	-0.46061	-0.519891	-0.605022	-0.687449	-0.5949	-0.595822	0.000548709	0.686232	0.820439	-0.749444	-0.417265	0.676508	-0.141612	-0.289068	-0.654946	0.422886
3-hr	-1.10142	0.160169	1.14825	1.09223	0.647255	1.00988	0.603281	0.645353	0.975	-0.0322474	0.253495	0.504209	0.427941	0.242507	-0.219984	-0.0118095	-0.841668	-0.815157	-0.656473	-0.951102	-0.921375	-0.853177	-0.24093	-0.321422	-0.504977	-0.478777	-0.5364	-0.542593	-0.687433	-0.670336	-0.610572	-0.385521	-0.566121	-0.486883	-0.540678	-0.585014	-0.63511	-0.422049	-0.525683	-0.134602	0.65552	0.596656	-0.878744	-0.781433	-0.293685	0.0204595	0.146927	-0.519954	0.436244
6-hr	0.140366	0.829005	0.0364498	0.202595	0.812044	1.0971	1.07584	1.07767	1.34623	1.01907	0.71773	0.618492	0.867904	0.642132	0.234319	0.336271	0.0938147	-0.386361	-0.0599902	-0.0970651	-0.234777	-0.108605	-0.094791	-0.0142539	-0.422698	-0.338794	-0.45074	-0.366956	0.145426	-0.0398419	0.402135	0.347364	0.00767313	-0.1282	-0.443313	-0.461896	-0.481709	-0.299337	-0.453617	0.986942	1.42828	0.482451	0.913022	-0.287109	0.284508	-0.0660391	0.307879	0.269054	0.411287
6-hr	0.125468	1.68719	0.0954273	0.871829	0.496169	1.2318	1.0138	0.976155	1.13707	0.972513	0.5157	0.649687	0.943053	0.518618	0.527387	0.261831	0.133143	-0.267277	-0.283966	-0.355774	-0.229034	-0.0949512	-0.0448935	-0.0671472	-0.383705	-0.297113	-0.453655	-0.349771	-0.239436	0.19812	0.21244	-0.0760693	0.149865	-0.0996329	-0.530735	-0.458893	-0.525306	-0.276942	-0.518406	0.962854	1.15811	0.63256	0.938494	-0.269145	0.773883	0.577467	0.286959	0.252372	0.795453
6-hr	0.387681	1.40672	0.103139	0.239314	0.787318	1.45967	0.681923	1.10773	1.76239	1.15682	0.819044	0.977723	1.38054	0.947383	0.451981	-0.0651138	-0.39311	-0.36609	-0.138293	-0.215339	-0.422015	-0.186789	0.0157323	-0.263587	-0.360679	-0.324698	-0.442792	-0.344747	-0.377874	-0.0554916	0.341658	0.306104	0.123798	-0.00177624	-0.562133	-0.512444	-0.492334	-0.280333	-0.481417	0.641352	1.3311	0.480128	0.529589	0.144885	0.846309	0.639367	0.161741	0.458336	0.508695
12-hr	2.02564	1.24136	1.31059	1.07356	0.879228	0.585137	1.81025	1.09605	1.51498	1.83505	1.46066	0.772339	1.26307	1.24713	1.06118	1.03617	0.481853	0.548613	0.38911	1.21724	-0.0760546	0.327084	0.495145	0.61484	-0.202943	0.0564175	0.174164	-0.260394	1.09587	0.972364	0.696768	0.733422	0.150861	0.211562	0.0100531	-0.176403	-0.281271	0.14998	-0.124388	1.31156	0.61275	1.96854	3.26807	2.28717	1.32294	0.818692	1.89227	1.27688	1.71708
12-hr	2.80303	1.87448	1.85382	2.45533	2.38616	1.72762	2.43869	2.56537	2.28917	2.85751	2.66196	2.1817	2.43087	2.86212	1.06763	-0.0683493	1.51331	1.38328	0.314233	0.36093	1.15642	0.586658	0.937408	-0.448348	0.07847	0.00227204	-0.397969	0.347131	-0.0617598	-0.117051	0.850658	1.20542	0.545219	0.702062	-0.506558	-0.0510583	-0.0553628	-0.279243	-0.0254117	2.10312	2.1405	1.94811	0.953083	2.12662	2.33003	2.53933	1.87061	2.0866	2.23832
12-hr	2.83739	1.66841	1.83236	2.03169	2.01983	2.07208	2.29019	2.61663	2.25005	2.3893	2.33269	1.74542	1.73526	1.65962	0.65671	0.424927	1.69039	0.997491	0.607981	0.44554	0.872265	0.761892	0.721703	-0.322416	-0.0242564	0.107072	-0.185445	0.224377	0.195983	0.475163	0.970765	0.708136	0.284362	0.550216	-0.52784	-0.149445	-0.294109	0.102502	0.0424307	1.19223	1.83075	1.9059	0.686098	2.44715	2.08762	1.44213	1.77316	1.41043	2.08467
24-hr	-0.179106	0.333107	-0.03096	-0.248709	0.864389	0.666678	0.491771	0.272878	0.408415	-0.560358	0.895559	1.42949	1.04351	1.01341	1.0978	1.05789	1.2404	0.969656	1.20243	0.889747	1.98712	1.44111	0.403224	1.17471	0.892945	1.1411	1.06335	1.29659	2.11771	2.09707	1.98536	1.77457	2.23493	2.3457	2.57149	1.99328	2.09145	2.49018	2.44857	0.545444	0.0894669	0.542001	0.956084	0.774147	0.448225	1.66953	1.23055	1.75383	1.31973
24-hr	0.0380068	0.161192	0.320037	-0.120916	1.32014	-0.0928759	0.559005	0.346263	0.194234	-0.448112	0.783085	1.12898	0.704665	0.720229	0.745341	0.803463	1.05959	1.35897	1.30926	1.60422	0.989945	1.41919	0.389116	0.799707	0.857082	1.19867	1.06075	1.18879	1.89615	1.77215	1.99043	1.76733	1.81406	2.10663	2.21225	1.64063	1.85682	1.94873	2.1039	0.82146	0.54897	0.969585	1.10017	0.882608	1.02602	1.87155	2.49012	2.13573	0.976589
24-hr	0.172731	0.267039	0.216046	0.118041	0.353069	0.345756	0.423453	0.512225	-0.0497158	-0.536533	0.647563	1.32481	1.29989	1.09686	0.893356	0.571284	0.980327	0.832558	1.43406	1.23831	1.18127	1.29544	0.428285	1.14235	0.859416	1.10388	1.08754	1.22255	2.02352	2.18064	1.92164	1.96582	2.05947	2.06934	2.68175	1.905	2.11998	2.48802	2.17403	0.943076	0.607678	0.541299	1.00042	1.41685	1.44104	1.99064	1.79229	2.26252	1.0221
48-hr	-0.875025	-1.43117	-1.85145	-1.54117	-0.281944	-1.69151	-0.995202	-1.20786	-1.10055	-1.37327	-1.01375	-1.39891	-0.190364	-0.507349	1.07423	2.52414	1.47951	2.14266	2.33381	2.24954	1.88903	1.9417	2.56354	2.62002	2.68893	2.47923	2.55546	2.33242	1.50048	1.30757	1.12975	1.14874	1.64727	1.43308	1.30249	2.08695	1.90039	1.44523	1.43195	1.33779	-0.150285	0.0730466	0.998687	0.293918	-0.853034	-0.506817	-0.600041	-0.49942	-0.0728539
48-hr	-0.896024	-1.82441	-1.89035	-1.56892	-0.952276	-1.67812	-0.988991	-1.29276	-1.30253	-1.36733	-1.18654	-1.37638	-0.479504	-0.594614	1.68227	2.26172	1.75145	1.8387	2.18441	2.13471	2.28384	1.92115	1.99295	2.34409	2.62374	2.53056	2.57677	2.41011	1.76039	1.68267	1.3561	1.05036	1.46905	1.44247	1.25026	2.04842	1.70093	1.39766	1.7336	0.894188	-0.18377	0.266802	0.489375	0.147343	-0.944021	-0.854191	-0.544253	-0.541021	-0.412381
48-hr	-0.856922	-1.77784	-1.79439	-1.60136	-1.34174	-1.61685	-0.885594	-1.17176	-1.16362	-1.41073	-1.13247	-1.42677	-0.544539	-0.410593	1.55907	1.86165	1.68259	2.36639	2.2171	1.98288	1.74889	2.07733	2.94988	2.45873	2.6902	2.51875	2.59703	2.53932	1.48418	1.62097	1.21639	1.99662	1.66665	1.21068	1.19456	1.98692	2.0091	1.47939	1.59213	1.25255	0.214715	0.689264	0.96545	0.354129	-0.720333	-0.389409	-0.558477	-0.380255	0.0763362
[truncated: 32 more columns]

## Sheet: D - intermediate-2 genes
Gene name	TACR3	SOX3	SYNJ2	CACNA1G	NPTXR	COL9A3	CCDC18	ZNF43	ZNF107	ZNF92	ZDHHC21	RBAK	SGO2	BRCA2	PUS7L	ZNF518A	ESCO1	LRRC40	ZNF267	RBM41	GCC2	PPIG	USP15	CWC22	RANBP2	CASP8AP2	KIF14	STAG2	BDP1	PHF3	ATAD5	SASS6	ZNF567	SPTSSB	ZBTB38	BCAP29	NEDD4	DEPDC1	USP25	NEDD1	BORA	NEK2	ASPM	KIF20B	ZNF493	TPR	KNL1	BOD1L1	OSBPL8
0-hr	-0.463561	-0.467854	-0.519654	-0.384334	-0.445426	-1.43808	-0.85134	-1.30353	-1.45999	-1.14837	-1.29564	-1.37284	-1.25861	-1.36454	-1.14926	-1.30152	-1.09495	-1.20224	-1.21543	-1.39762	-1.42858	-1.3161	-1.60173	-1.27239	-1.5932	-1.37091	-1.45842	-1.49582	-1.41769	-1.48158	-1.26032	-0.934551	-1.17383	-0.59852	-0.618153	-0.902539	-0.758177	-1.12189	-0.91318	-1.05869	-0.948031	-1.17882	-1.24277	-1.15981	-0.980113	-1.36975	-1.50315	-1.21853	-1.15511
0-hr	-1.15014	0.305017	-0.776447	-0.246713	0.0264073	-1.09292	-1.38415	-1.73182	-1.38138	-1.60604	-1.82877	-1.93464	-1.47533	-1.46008	-1.39116	-1.75222	-1.39254	-1.7064	-1.54967	-1.85696	-1.73677	-1.71907	-2.00566	-1.85953	-1.93274	-1.85981	-1.82741	-1.99434	-1.55273	-1.97495	-2.04391	-1.58535	-1.89614	-0.786064	-2.00586	-1.70606	-1.63208	-1.40499	-1.58844	-1.74988	-2.11488	-1.67702	-1.37549	-1.37585	-1.38162	-1.61824	-1.69441	-1.63069	-1.82529
0-hr	0.171729	0.0442866	-0.876493	-0.673722	-0.833661	-1.17436	-0.28704	-0.155593	-0.667487	-0.425282	-0.733038	-0.0396249	-0.554116	-0.775399	-0.320651	-0.322356	-0.23036	-0.244808	-0.383279	-0.245863	0.00852275	0.0730641	-0.51916	-0.405178	-0.100248	-0.0714583	-0.243698	-0.348983	-0.306854	0.129928	0.279274	-0.807729	-0.252332	-0.274463	-0.526771	-0.07708	-0.397965	-0.408799	-0.351256	-0.183516	-1.01143	-0.5991	-0.337883	-0.495659	-0.229192	-0.412509	-0.00299179	-0.134978	0.379326
0.5-hr	-0.0473299	0.155568	-0.882171	-0.566859	-0.54746	-0.781638	-0.430989	-0.124631	-0.0252941	-0.429752	0.252086	0.112394	-0.0848316	-0.224825	0.217709	0.0465788	-0.0299952	0.0363707	-0.0886792	-0.133526	0.506838	0.286429	0.384955	0.574185	0.552017	0.996211	0.322411	0.339321	0.684213	0.418396	0.646235	0.556749	0.644375	-0.474632	-0.195593	0.255539	-0.55794	-0.300358	-0.599736	-0.251585	-0.153136	-0.229685	0.267573	-0.319306	-0.213799	0.175921	-0.0764317	0.27454	0.716358
0.5-hr	0.0800886	-0.362363	-0.760494	-0.554343	-0.558803	-0.860968	1.5401	0.616238	1.43886	0.630175	-0.362703	0.135017	1.13612	0.795084	0.572249	0.536146	0.838153	1.31306	1.46615	0.758264	1.07354	1.18384	1.53872	1.40648	1.22825	0.984582	1.19079	1.29109	1.90243	0.890559	0.700417	1.3341	1.5658	-0.200894	0.137595	-0.35167	-0.28328	0.0207046	-0.348315	-0.0156427	-0.0197978	-0.123386	1.44743	2.02391	1.44539	0.966994	0.564802	0.507324	0.985864
0.5-hr	-0.0789837	-0.174398	-0.569724	-0.845193	-0.426032	-1.12686	-0.665084	-0.487063	-0.366244	-0.845983	-0.625059	-0.315935	-0.741539	-0.717741	-0.225936	-0.43715	-0.415301	-0.447528	-0.593864	-0.181796	-0.125796	-0.175498	0.16996	-0.364496	0.305993	-0.049386	-0.161629	-0.158259	-0.153534	-0.0600929	-0.222241	-0.214498	0.10837	-0.853422	-0.868434	-0.458141	-0.331706	-0.62139	-0.632209	-0.461996	-0.0734598	-0.61859	-0.401523	-0.852735	-0.526024	-0.288238	-0.200158	0.0131214	0.14648
1-hr	0.108317	-0.080656	-0.560762	-0.729676	-0.541308	-0.76066	0.633152	0.364634	0.683735	-0.254848	0.0670832	0.354377	0.135776	0.331285	0.0619744	0.198155	0.267663	0.191946	0.631943	0.520488	0.702483	0.497901	0.686549	1.1397	0.952853	0.819566	0.742461	0.538973	1.07847	0.391637	0.264258	0.169373	0.345067	-0.814015	-0.424882	-0.0686661	-0.624357	-0.216875	-0.501751	-0.269291	0.126479	-0.342405	0.805211	0.524662	0.146154	0.701315	0.271026	0.605156	0.450427
1-hr	-0.50443	-0.471834	-0.773539	-0.721447	-0.233076	-0.839352	-0.625061	-0.406983	-0.648419	-0.920799	-0.346909	-0.353201	-0.830259	-0.861189	-0.284147	-0.544647	-0.773212	-0.602837	-0.687308	-0.5045	-0.486211	-0.638929	-0.270492	-0.732768	-0.330441	-0.295398	-0.725846	-0.416159	-0.445099	-0.353772	-0.0784232	-0.741521	-0.219075	-0.544699	-0.575392	-0.41936	-0.624277	-0.761606	-0.442991	-0.674124	-0.414348	-0.808047	-0.736956	-0.703427	-0.677638	-0.47809	-0.335276	-0.236655	-0.264109
1-hr	0.787352	-0.336372	-0.886438	-0.624792	-0.54225	-1.32586	0.572066	1.04912	0.851552	0.892221	0.175033	0.1364	0.384996	0.278517	0.436297	0.174603	0.255495	1.09314	1.25669	0.423896	0.00257667	-0.177659	1.13138	0.190051	0.94489	0.438834	0.587612	0.846248	0.92345	0.425669	0.264492	0.491336	0.101978	-0.352244	-0.757663	-0.379441	-0.406561	-0.135785	-0.606696	-0.260537	-0.249195	-0.433223	0.856888	0.838102	1.50043	0.479988	0.446148	-0.121934	0.664313
3-hr	-0.611874	-0.591037	0.639277	0.199162	0.175674	0.451976	-0.382048	-0.500053	-0.404308	-0.0287524	-0.160378	-0.0770491	-0.725545	-0.706106	-0.521823	-0.230634	-0.444645	-0.319027	-0.259014	-0.461115	-0.620958	-0.461505	-0.205948	0.007322	0.103844	0.0268662	-0.323031	0.0603532	-0.263741	-0.370406	-0.219571	-0.0185504	0.510476	-0.694497	-0.725961	-0.11854	-0.94511	-0.643247	-0.45397	-0.587768	-0.138522	0.251695	-0.658799	-0.815024	-1.17572	-0.757798	-0.580889	-0.740038	-0.20257
3-hr	0.162782	-0.384998	1.40388	0.362021	-0.268684	-0.0720899	0.2131	0.613012	1.10346	1.52942	1.03106	0.915593	0.351502	0.614024	0.524774	0.888321	0.768058	0.935705	1.14058	0.153177	0.740856	1.05566	0.344741	0.673336	1.1423	1.13963	0.739063	0.786869	0.885371	0.677156	0.741241	1.27397	0.521854	-0.474007	-0.651594	0.13065	-0.12069	-0.326187	-0.0146632	-0.44093	-0.0247077	-0.133102	1.06887	0.849258	0.170487	0.782072	0.305935	0.530417	0.469764
3-hr	-0.688037	-0.240065	0.600954	0.567773	0.11237	0.421416	-0.829725	-1.06409	-1.07126	-0.762251	-0.82471	-0.80465	-0.657279	-0.773529	-0.791365	-0.886834	-0.481071	-0.581166	-0.187471	-1.04881	-0.515149	-0.289302	-0.292043	-0.114161	-0.399949	-0.644627	-1.02397	-0.321372	-0.829369	-0.593614	-0.55457	-0.42071	-0.510432	-0.571384	-0.816521	-0.617822	-0.823936	-0.868388	-0.612764	-0.772361	0.408007	-0.194785	-0.824564	-0.41688	-1.19622	-0.853046	-0.972044	-0.945637	-0.885757
6-hr	-0.886994	-0.932474	1.02686	0.690558	0.106034	0.703173	-0.89516	-0.918095	-0.765594	-0.694259	-0.434664	-0.476121	-1.00836	-1.12709	-0.940873	-0.743579	-1.06554	-1.04204	-1.08637	-0.779918	-0.90387	-0.86033	-0.244963	-0.339408	-0.704746	-0.805168	-0.735205	-0.732529	-0.741303	-0.612205	-0.839772	-0.394716	-1.12148	-0.633286	0.193647	-0.956183	0.00956113	-0.839941	-0.383125	-0.427886	-0.346763	-0.55917	-1.05147	-1.10842	-0.792852	-1.02526	-0.803069	-0.940712	-0.729319
6-hr	-1.01429	-1.0856	0.677742	1.13185	0.431042	0.328098	-1.04036	-1.51145	-1.69745	-1.1877	-1.14394	-1.22092	-1.42801	-1.20362	-1.24665	-1.20723	-1.34735	-1.28044	-1.57806	-1.35889	-1.32239	-1.22318	-0.603218	-1.26466	-1.23089	-1.43355	-1.14925	-1.20756	-1.24831	-1.19274	-1.38073	-1.39429	-0.734821	-0.942932	-0.835345	-0.757056	-0.78555	-1.23787	-0.773214	-0.586307	-0.67647	-0.530842	-1.25011	-1.25998	-1.15434	-1.41992	-1.40147	-1.37243	-1.40186
6-hr	-1.25357	-1.09649	0.93651	0.706182	0.680453	0.415205	-1.42225	-1.37561	-0.941966	-1.11643	-1.04841	-1.42128	-1.38831	-1.23086	-1.50664	-1.3927	-1.44216	-1.22451	-1.41275	-0.891098	-1.5437	-1.29129	-1.34583	-1.28046	-1.64113	-1.4374	-1.378	-1.41369	-1.5155	-1.54017	-1.44998	-1.24852	-1.06385	-1.09389	-0.404805	-1.25015	-1.06436	-1.24357	-0.899923	-1.24816	-0.0569639	-0.685512	-1.23307	-1.23276	-1.39461	-1.50984	-1.33684	-1.48238	-1.59407
12-hr	-0.45373	-1.00032	-0.023148	0.322284	0.214389	0.506718	-0.0793632	0.0999719	0.0202058	0.335774	0.396129	-0.0449476	0.148348	0.300341	-0.542911	0.0359489	0.347617	0.373529	0.126013	0.854423	1.10988	-0.144673	0.734	0.587059	0.782427	0.71005	0.528486	0.51276	0.413662	0.422721	0.0339865	0.454355	0.143346	-0.917883	-0.443715	-0.195972	0.120851	0.0240835	-0.246913	0.60197	0.170203	0.347616	0.560144	0.410988	0.147128	0.378428	0.484337	-0.0277043	-0.0413334
12-hr	-1.16569	-0.897558	0.272061	1.75279	1.4096	0.55498	-1.34119	-1.3342	-1.67158	-1.70251	-1.70929	-1.95437	-1.64345	-1.38973	-1.64826	-1.85361	-1.78373	-1.9662	-1.8426	-1.67972	-1.784	-2.00889	-2.40279	-1.99032	-1.91425	-1.80788	-1.97042	-1.98599	-1.80091	-2.08323	-1.95487	-2.20744	-2.31061	-1.45341	-1.67331	-1.91519	-1.80726	-1.47187	-1.7399	-1.78056	-2.61123	-2.36385	-1.48708	-1.52035	-1.70487	-1.60953	-1.67259	-1.58918	-1.97484
12-hr	-1.19044	-0.661188	0.207111	1.04634	1.96524	1.0605	-1.74477	-1.55498	-1.49645	-1.681	-1.60877	-1.89058	-1.4394	-1.32265	-1.75988	-1.70925	-1.6343	-1.94109	-1.77985	-1.71829	-1.71194	-1.83527	-2.06082	-2.28511	-1.93714	-1.95275	-1.72349	-1.97519	-1.78627	-2.13149	-1.94245	-1.68254	-1.96634	-1.13041	-1.39129	-1.69925	-1.62128	-1.48168	-1.73613	-1.77579	-2.18098	-1.98047	-1.43282	-1.41591	-1.34835	-1.65109	-1.65713	-1.58718	-1.89586
24-hr	1.64025	2.05412	2.33631	1.71128	1.03209	1.94446	0.761035	0.883091	0.666766	0.644496	0.27264	0.734322	1.04752	0.884876	0.399204	0.425509	0.75035	0.598209	1.04119	1.19269	1.16636	0.918527	0.976922	1.06935	1.14072	1.34291	1.32563	1.27462	1.26775	0.971457	1.2487	1.95836	1.06795	1.00463	0.92173	1.28231	1.36225	1.18607	1.04617	1.62769	0.856847	0.70112	1.93143	1.66698	1.16751	1.37951	1.62994	1.59887	1.21929
24-hr	1.07135	2.24559	1.94443	2.25081	2.72416	1.8204	0.798611	1.05402	0.588765	1.3264	0.948679	0.786712	0.671989	0.804537	0.537303	0.512536	0.478721	0.629445	0.480523	1.56695	0.842694	0.736952	0.636816	0.915667	1.15183	1.53939	1.29814	1.16911	1.1346	0.998306	1.06866	1.11873	0.672844	0.396596	1.58543	1.37511	1.28085	1.05426	0.740091	1.71045	0.839291	0.984673	1.55296	1.33597	1.56128	1.15495	1.27928	1.07956	0.842616
24-hr	1.13416	1.92754	2.17394	1.85509	0.964094	2.13458	1.13632	0.983719	0.977417	0.993597	0.917232	0.834748	0.994694	0.87037	0.295006	0.486988	0.447985	0.545279	0.636464	0.854817	0.91017	0.616641	0.82582	0.837985	1.18832	1.27957	1.42934	1.31695	1.2744	0.827117	1.38498	1.25156	1.04567	0.618449	1.01168	0.69812	1.28344	1.13917	0.830141	1.06765	0.860449	1.31866	1.70674	1.4612	1.18321	1.09063	1.63445	1.42678	1.11362
48-hr	-1.04557	-0.971306	-1.16307	-1.2962	-1.8583	0.157111	0.279156	0.759665	0.773838	0.514314	1.18306	0.740244	0.675128	0.308879	0.507769	0.513988	-0.159379	0.231951	0.313465	1.01917	0.121064	0.383945	0.288739	0.0912159	0.318948	0.221157	0.59726	0.191429	0.345813	0.710314	0.132136	-0.155094	0.311139	1.47897	1.45213	2.09137	0.651942	1.21299	1.47156	1.23628	1.38526	0.959855	0.728024	0.488541	1.25333	1.05264	0.911312	1.289	1.1118
48-hr	-1.11666	-1.06802	-1.01455	-1.12765	-1.75704	-0.087122	0.13645	1.07868	0.623596	1.03618	1.2512	1.10036	0.811692	0.177082	0.50836	0.468705	0.207932	0.402856	0.368966	0.553769	0.265759	0.551255	0.0547107	-0.0616591	0.246163	0.323684	0.695587	0.300577	0.279381	0.706796	0.333014	0.244592	0.170052	1.57104	1.24668	1.28843	1.17411	1.51908	1.68146	1.44115	1.03109	1.12538	0.460314	0.656924	0.560703	0.990072	1.02863	1.29286	1.2946
48-hr	-1.1386	-0.813257	-1.1359	-1.4437	-1.90605	-0.973469	-0.0568739	0.248661	0.303103	0.360765	0.797208	0.779008	0.62001	0.0930516	0.212062	0.525574	0.322004	0.424202	0.323999	0.100435	0.270474	0.226174	0.561895	-0.00639084	0.271604	0.189255	0.48746	0.2883	0.0122959	0.363823	0.522929	-0.143557	-0.169733	1.24267	1.59597	0.966573	0.825682	1.15726	1.64948	0.49113	0.670199	0.829627	0.576212	0.120307	0.822501	1.44114	1.0985	1.40749	0.725685
[truncated: 593 more columns]

## Sheet: E - late genes
Gene name	NDUFA7	AP5Z1	SLC35B2	FZD4	CANT1	UBALD2	INSIG2	RAB11FIP2	ELMOD2	TENT2	TMEM106B	NUDT12	CEP70	ETAA1	VPS13C	CHD9	ZC2HC1A	NEK1	RSRC2	HINT3	ERI2	MOSPD2	CEP44	MAP3K2	PLEKHF2	EMC2	ZNF12	CCDC14	SNX13	SHOC2	HIF1A	SLC25A36	UEVLD	PLAG1	IFT80	BNIP3L	SCOC	STK3	KLHL28	ZNF429	DZIP3	BBX	MYO9A	DIAPH2	NHLRC3	LMBRD2	PIBF1	SCRN3	POLK
0-hr	-0.989716	-1.35	-0.442558	-0.718936	-0.671392	-0.903193	-0.925276	-1.03955	-0.924993	-0.801765	-1.06427	-1.19174	-1.01567	-0.986534	-0.919205	-1.17045	-1.20073	-0.865425	-1.33512	-0.687684	-0.922936	-1.20418	-0.893492	-0.936224	-1.00179	-0.924941	-0.762271	-0.925124	-1.34852	-0.941264	-0.955631	-0.679185	-0.741994	-0.852591	-0.903465	-0.54271	-1.04899	-0.481596	-1.07888	-0.894343	-0.621133	-0.539067	-0.653194	-0.76587	-1.04587	-0.77738	-0.793178	-0.706265	-1.0781
0-hr	0.298774	-0.584549	-0.2935	-0.331664	-0.188917	-0.959465	-1.40655	-1.86644	-2.01813	-1.85806	-1.32453	-1.58919	-1.24696	-1.37491	-1.22758	-1.63035	-1.43419	-1.73644	-1.83221	-1.49296	-2.03106	-1.62593	-1.79642	-1.75266	-1.46294	-1.91659	-1.90108	-1.90024	-2.15959	-1.78231	-1.75852	-1.58687	-1.43017	-1.4082	-1.47893	-1.73951	-1.44585	-1.71349	-1.41803	-1.51759	-2.00714	-1.56422	-1.54601	-1.62079	-1.28162	-1.38535	-1.26126	-1.31592	-0.970477
0-hr	-2.53873	-2.2026	-1.31251	-0.510729	-0.516717	-1.71091	-0.0389692	0.417393	0.426614	-0.0219436	0.0389966	-0.14751	-0.415374	-0.13786	-0.020502	-0.219762	0.102001	-0.760118	-0.524472	-0.0702845	-0.16534	-0.29484	-0.32833	0.253776	-0.421763	-0.185951	0.219342	0.0708096	0.154009	0.187531	0.0368535	0.183563	0.557615	0.346467	0.0366221	0.073493	0.231764	-0.130127	0.637417	0.238119	-0.0441829	0.145249	0.0130447	0.409031	-0.170297	-0.34325	-0.609034	-0.116883	-0.191358
0.5-hr	0.828663	-0.509109	-0.306339	-0.632115	-0.139855	-0.631883	-0.581084	0.355997	0.0927083	-0.0660229	-0.265179	-0.307687	-0.249583	-0.478745	-0.135999	0.303501	-0.207871	-0.187942	-0.0927394	-0.21333	-0.540125	-0.423589	-0.488718	-0.158664	-0.386696	-0.077106	-0.136766	0.173104	-0.018877	0.0142975	0.289412	0.114296	-0.396908	-0.358687	-0.162124	-0.493684	-0.513196	-0.69241	-0.193253	-0.266628	0.0625485	-0.211146	0.288082	0.133241	-0.626216	-0.30175	-0.373424	-0.51704	-0.58643
0.5-hr	0.152684	-0.897485	-0.283089	-0.557615	-0.283128	-0.806522	-0.344092	0.321344	0.531667	0.00151096	0.0817198	0.154977	0.707472	0.55767	0.217758	0.413506	0.675463	0.415649	0.181309	-0.0911476	-0.090489	-0.218913	-0.403286	-0.510888	-0.743113	0.922022	0.201619	0.426371	0.280897	0.50789	0.702968	0.488382	-0.58711	-0.195227	0.279905	0.0318361	0.295384	0.54643	0.343584	0.700449	0.365986	-0.0307388	0.0386119	0.284098	-0.129096	-0.07659	0.142656	-0.439557	-0.242187
0.5-hr	-0.102837	0.206512	-0.337743	-0.663573	-0.404705	-1.13051	-0.611613	-0.338545	-0.0335005	-0.261685	-0.608911	-0.574301	-0.687937	-0.623926	-0.244788	-0.0723626	-0.589641	-0.0617961	-0.679245	-0.844699	-0.260449	-0.58556	-0.762583	-0.705935	-0.720584	-0.540853	-0.200538	-0.00606421	-0.0636445	-0.225909	-0.150429	-0.327575	-0.728387	-0.506858	-0.382858	-0.52696	-0.582375	-0.583761	-0.312328	-0.422458	0.0282866	-0.234914	-0.292247	0.197868	-0.594995	-0.47191	-0.214847	-0.984284	-0.735363
1-hr	-0.666615	-0.429245	-0.0145975	-0.562924	-0.278485	-0.284324	-0.285377	-0.192524	0.178057	-0.345311	-0.179458	-0.128796	0.0718357	0.25996	0.374509	0.51277	-0.0160481	0.248692	-0.00720357	-0.43669	-0.242474	-0.416011	-0.692402	-0.17603	-0.17957	0.10801	-0.185268	-0.0860607	0.023338	-0.507755	0.433809	0.23367	-0.297635	-0.509483	0.21289	-0.388801	-0.236029	-0.314197	-0.803854	-0.184395	-0.0534012	-0.252158	0.199326	0.156072	-0.33535	-0.540919	-0.20383	-0.733238	-0.762428
1-hr	-0.404304	-0.252688	0.0913394	-0.624943	-0.0951486	-0.572394	-0.875456	-0.309865	-0.139319	-0.727092	-0.428817	-0.530704	-0.950603	-0.723321	-0.129494	-0.313429	-0.822408	-0.73956	-0.538097	-0.557645	-0.546119	-0.46538	-0.529332	-0.436959	-0.17073	-0.921382	-0.398992	-0.33312	-0.374919	-0.606078	-0.258095	-0.224699	-0.277392	-0.548193	-0.45955	-0.701273	-0.859658	-0.709821	-0.533983	-0.796914	-0.285512	-0.214159	-0.0346412	-0.0719647	0.381561	-0.415354	-0.656689	-0.246751	-0.619508
1-hr	-0.830331	0.0304359	-0.0993068	-0.43105	-0.381297	-0.370675	-0.12464	0.255414	0.236054	0.286564	-0.063244	0.329927	0.482813	0.268075	-0.0316774	0.320524	0.382352	0.00285819	-0.146432	-0.860542	-0.453577	-0.517023	-0.338448	-0.0781928	0.214902	0.379411	-0.126872	0.0945022	0.245854	-0.166566	0.725025	0.362985	0.0467786	-0.463433	0.280723	-0.371254	0.21633	-0.108814	-0.549008	-0.255925	0.0827539	-0.394571	-0.216759	0.106222	-0.866611	-0.172924	0.197666	-0.396777	-0.559085
3-hr	0.137057	0.456919	0.150685	-0.769185	-0.313266	-0.0418429	-0.434636	-0.567117	-0.143595	-0.648713	-0.471245	-0.1077	-0.489795	-0.828246	-0.551941	-0.521075	-0.323089	-0.264047	0.0667861	0.0650685	-0.0838228	-0.0268492	-0.0274325	0.160166	-0.38971	-0.112007	0.0670562	-0.167474	0.119863	-0.641944	-0.305088	-0.207879	-0.843453	-0.830197	-0.63901	-0.253246	-0.301798	-0.561036	-0.128699	-0.823579	-0.657018	-0.817018	-0.620495	-0.917745	-0.496295	-0.485475	-0.854703	-0.818805	-0.651573
3-hr	0.429292	0.947653	-0.544604	-0.267064	-0.217735	-0.348022	0.0964896	0.060839	0.0813653	-0.160793	0.231134	-0.0474754	0.110498	0.500368	-0.164548	0.126398	0.209163	0.09757	0.559406	-0.226878	-7.52676e-05	0.0742019	0.158149	0.266505	0.18618	0.628545	0.0417253	0.256025	0.520716	0.113312	0.289343	0.408441	0.0206615	-0.300292	-0.344912	-0.177714	-0.0397234	-0.622945	-0.346223	0.0584589	-0.459657	-0.522635	-0.72321	-0.508622	-0.910581	-0.171441	-0.584481	-0.372693	-0.252498
3-hr	1.18354	-0.0914052	0.316442	-0.101296	-0.379845	0.194366	-0.152	-1.09244	-0.777523	-0.551102	-0.700019	-0.715393	-0.424143	-0.978988	-0.827686	-0.92586	-0.611693	-0.604451	-0.320499	-0.346791	0.113192	-0.212694	-0.634636	-0.780856	-0.0266973	0.0419364	-0.304426	-0.905433	-0.249078	-0.366919	-0.45687	-0.849222	-0.484489	-0.912368	-1.18885	-0.421688	-0.291338	-0.704048	-0.58058	-0.763064	-0.829634	-0.686258	-0.70761	-0.852106	-0.553975	-1.02722	-0.892632	-0.855039	-0.648287
6-hr	-1.55908	0.942723	-0.109051	1.07141	0.12468	0.379258	-0.230301	-0.600622	-0.94002	-0.834687	-0.925688	-0.42497	-1.1576	-0.885753	-0.593056	-0.733257	-1.14372	-0.775657	-0.0767594	-0.481736	-0.378853	-0.0973069	-0.454447	-0.215357	-0.909593	-0.486118	-0.414102	-0.397446	-0.302227	-0.431395	-0.766716	-0.797552	-0.971561	-0.916891	-0.836177	-0.827114	-0.966604	-0.596042	-0.777304	-0.722019	-0.183572	-0.484295	-0.61522	-0.645135	0.113405	-0.625829	-0.540346	-0.5738	-0.569662
6-hr	-0.0449179	0.502252	0.300485	0.998773	-0.0532909	0.836686	-1.08054	-0.946819	-1.02054	-0.872742	-1.11604	-1.24545	-1.29771	-1.26869	-1.22757	-1.22219	-0.880208	-1.22592	-0.630238	-0.715223	-0.59893	-0.685334	-0.46898	-0.805836	-0.945333	-0.779244	-0.793629	-0.930594	-0.664229	-0.852585	-0.964946	-1.07866	-0.4849	-0.695116	-0.950448	-0.820741	-1.03701	-0.608472	-1.00145	-1.18579	-0.586052	-0.878175	-0.47217	-0.881446	-0.0646204	-0.90958	-1.18663	-0.595099	-0.956573
6-hr	-0.448894	0.556191	1.19959	1.15225	0.0412256	0.229662	-0.353352	-1.225	-1.08963	-0.937955	-1.36941	-0.987083	-1.34107	-1.22183	-1.1844	-1.26969	-1.04767	-0.950243	-0.545062	-0.493873	-0.983149	-1.03773	-0.27126	-0.694768	-1.19294	-1.25919	-0.692116	-1.06278	-0.835706	-0.953064	-1.29644	-1.26772	-0.908799	-0.842928	-1.15661	-1.07699	-1.31867	-1.04215	-1.39828	-1.12148	-0.882972	-0.840383	-0.891747	-1.07795	-0.520916	-1.21131	-1.4404	-0.658283	-0.968585
12-hr	-1.56312	-0.105276	0.605429	0.388196	0.20821	-0.117194	-0.444532	-0.164464	-0.0620649	-0.30188	-0.176434	-0.274609	-0.130886	-0.210689	-0.518358	-0.227595	0.0368986	0.163964	-0.374497	0.199529	-0.260592	0.166409	-0.183954	-0.339889	0.0654807	0.262656	-0.101102	-0.438425	-0.143989	0.11361	-0.351098	-0.45686	0.149686	-0.313332	-0.0704322	0.448262	0.0638954	-0.211048	-0.0374924	-0.538494	0.0460776	-0.326825	-0.598055	-0.304473	-0.592383	-0.451655	-0.0732207	-0.430593	0.0932155
12-hr	0.455469	1.55129	1.39359	1.37376	1.75768	1.70433	-1.51705	-2.06023	-2.11616	-1.94187	-1.55835	-1.78775	-1.55117	-1.62139	-1.50669	-1.70675	-1.81837	-1.80464	-2.33729	-2.06095	-1.84402	-1.92221	-1.85897	-2.089	-1.94547	-2.39633	-2.22408	-2.25001	-2.41457	-2.15362	-2.18031	-1.99942	-2.03347	-1.76524	-2.05763	-1.81073	-1.77415	-1.83709	-1.72659	-1.33513	-2.29728	-1.80713	-2.0763	-1.72005	-1.81312	-1.63432	-1.44064	-1.40373	-1.32811
12-hr	1.38349	1.02646	0.834784	0.993322	0.720337	2.06324	-1.45852	-1.83895	-1.94527	-1.85069	-1.42247	-1.54681	-1.7591	-1.5866	-1.59539	-1.78461	-1.60169	-1.98343	-2.22686	-1.69822	-2.0821	-1.83474	-1.99969	-2.16127	-1.61609	-2.09341	-2.26691	-2.06442	-2.22608	-1.9669	-2.0349	-1.86071	-1.7041	-1.57086	-1.45858	-1.62655	-1.60744	-1.60597	-1.73223	-1.39386	-2.11233	-1.79093	-1.84449	-1.61522	-1.09146	-1.42184	-1.29222	-1.07312	-1.35438
24-hr	-0.97755	0.304982	0.408989	0.895922	1.17809	1.45614	0.232319	0.594991	0.305401	0.784144	0.119163	0.123175	0.578378	0.506856	-0.486152	-0.126824	0.160416	0.224301	0.689698	0.0386735	0.25298	0.244018	0.406244	0.425543	0.438107	0.288999	0.168712	0.254049	0.527268	0.743427	0.277182	0.227993	0.656663	1.0228	0.105825	-0.0610388	0.54061	0.873038	0.855834	0.330149	0.316806	0.194135	0.254596	0.1618	-0.208865	0.303975	0.433882	0.109162	-0.356632
24-hr	0.281628	0.0579518	0.342766	0.669514	1.20951	0.675307	0.795353	0.393191	-0.0313426	0.51455	-0.224728	-0.0628802	0.0935817	0.0803005	-0.566994	-0.210947	0.0586693	0.456447	0.509353	0.544325	0.430017	-0.0177645	0.398199	0.264203	0.49189	0.849009	0.446196	0.375017	0.0257103	0.573496	0.186434	0.294594	0.632965	0.506052	0.489353	0.338227	0.350448	0.749475	0.794149	0.3539	0.353171	0.236585	0.184835	-0.30948	-0.32112	-0.0676171	0.370061	0.179524	0.167565
24-hr	-0.951568	0.89464	0.466134	0.827722	1.25266	0.883346	0.0782905	0.276065	0.168893	0.26657	-0.0403671	-0.130065	0.341399	0.252239	-0.303075	-0.247526	0.450325	0.165445	0.845668	0.604211	0.562832	0.162302	0.189088	1.03526	0.599796	0.441366	-0.0302232	0.518555	0.381303	0.722725	0.225082	0.320509	0.228366	0.691433	0.218289	0.346021	0.465931	0.557006	0.284699	0.394241	0.330925	0.233423	-0.24253	-0.0933695	-0.0865004	0.30535	-0.0151116	0.0583246	0.197732
48-hr	1.54512	1.69843	1.67379	1.94583	1.9665	1.47576	1.72349	1.13187	1.2445	1.50181	1.32803	1.4315	1.05475	1.06709	2.06219	1.35103	1.15877	1.00324	1.25669	1.89696	1.69733	1.37778	1.63956	1.32783	1.86474	1.04462	1.28497	1.67404	1.3567	1.9417	1.73846	2.11532	2.03446	1.5506	1.77099	1.91539	1.61187	1.98646	1.97152	1.48234	1.30059	1.94408	1.40223	1.93816	1.89472	1.64628	1.3997	1.18357	1.51571
48-hr	0.86915	1.23617	1.57829	1.55983	1.6981	1.22526	1.96357	1.14688	1.26187	1.3947	1.43952	1.35458	1.40396	1.20465	1.45542	1.16147	0.440262	1.08312	1.38745	2.43386	1.84167	1.68695	1.25386	1.18789	1.65157	1.50805	1.73914	1.60229	1.27079	1.64193	1.57643	1.75639	1.69458	1.91648	1.80555	2.10179	2.12435	2.02759	1.1598	2.02045	1.74022	1.94142	1.76358	1.61679	1.93836	1.51854	1.77551	1.85204	1.48106
48-hr	0.95973	1.67383	2.30346	1.43323	1.52887	1.5082	1.655	0.861268	1.01638	1.18128	1.71387	0.939234	0.810862	0.874276	1.63222	1.50898	0.929901	0.621646	1.24899	1.5573	1.62577	1.97265	0.95665	1.42463	1.18787	1.51998	1.6813	1.4161	1.53844	1.67604	1.79486	1.99102	2.15617	1.71163	1.43377	1.41845	1.6061	1.19977	1.48344	1.00161	1.29601	1.88434	1.96075	1.78356	2.16675	1.16676	0.61069	1.11282	1.56165
[truncated: 860 more columns]
