# Supplementary material for: Temporally resolved early bone morphogenetic protein-driven transcriptional cascade during human amnion specification
Source: eLife. 2024 Jul 25;12:RP89367. doi: 10.7554/eLife.89367 (PMC11272160; doi:10.7554/eLife.89367)
Supplement: Supplementary file 3. — (A–C) Lists of antibodies (A), primers (B), and plasmids (C). [file elife-89367-supp3.xlsx]

## Sheet: A - antibodies
List of antibodies used in immunofluorescence and western blotting experiments
Gene/Epitope	Vendor	Catalog number	IF dilution	WB dilutions	Species
TFAP2A	DSHB	3B5	1:250	1:2000	mouse
p-ERM	CST	3141	1:500		rabbit
ISL1/2	DSHB	40.3A4-c	1:250		mouse
NANOG	CST	4903	1:500		rabbit
OCT4	CST	2750	1:500		rabbit
p-SMAD1/5	CST	9516S	1:200		rabbit
GATA3	CST	5852S	1:1000	1:2000	rabbit
HAND1	abcam	ab196622	1:250		rabbit
DLX5	R&D systems	AF6710	1:250		sheep
SOX2	R&D systems	AF1028	1:2000		goat
TBXT	R&D systems	AF2085	1:250		goat
PODXL	R&D systems	MAB1658	1:1000		mouse

## Sheet: B - primers
Primer Name	Primer Sequence	Drscription
CRISPR_hGATA3_CDS1#1_s	CACCGGTACTGCGCCGCGTCCATGT	Forward primer for hGATA3 gRNA
CRISPR_hGATA3_CDS1#1_as	AAACACATGGACGCGGCGCAGTACC	Reverse primer for hGATA3 gRNA
CRISPR_hTFAP2A_CDS2_s	CACCGCAACCGTGCCGTCCCGTTGC	Forward primer for hTFAP2A gRNA
CRISPR_hTFAP2A_CDS2_as	AAACGCAACGGGACGGCACGGTTGC	Reverse primer for hTFAP2A gRNA
PCR_GATA3_RI_fw#2	GCGAATTCCCCCACCGAAAGCAAATCAT	Forward primer to amplify GATA3 region spanning gRNA targeted site for indel validation
PCR_GATA3_NI_rv#2	CGGCGGCCGCTTGCCTTGACCGTCGATGTTA	Reverse primer to amplify GATA3 region spanning gRNA targeted site for indel validation
PCR_TFAP2A_RI_fw	GCGAATTCTTGTAGCTCGACGCCTGATT	Forward primer to amplify TFAP2A region spanning gRNA targeted site for indel validation
PCR_TFAP2A_NI_rv	CGGCGGCCGCGGCTGTAGGGGTCGTTGAC	Reverse primer to amplify TFAP2A region spanning gRNA targeted site for indel validation
Seq-3'TR-pPB-Fw	TTATGGTAATCGTGCGAGAG	sequence primer for screening indel mutation in pPBCAG-GFP
qPCR_h_GATA1_fw	CCAAGAAGCGCCTGATTGTC	qPCR primer
qPCR_h_GATA1_rv	ATCCTTCCGCATGGTCAGTG	qPCR primer
qPCR_h_TFAP2A_fw	AGGTCAATCTCCCTACACGAG	qPCR primer
qPCR_h_TFAP2A_rv	GGAGTAAGGATCTTGCGACTGG	qPCR primer
qPCR_h_ISL1_fw	GCGGAGTGTAATCAGTATTTGGA	qPCR primer
qPCR_h_ISL1_rv	GCATTTGATCCCGTACAACCT	qPCR primer
qPCR_h_HAND1_fw	CCAAGGATGCACAGTCTGG	qPCR primer
qPCR_h_HAND1_rv	AGGAGGAAAACCTTCGTGCTG	qPCR primer
qPCR_h_SOX2_fw	GCTTAGCCTCGTCGATGAAC	qPCR primer
qPCR_h_SOX2_rv	AACCCCAAGATGCACAACTC	qPCR primer
qPCR_h_NANOG_fw	GATTTGTGGGCCTGAAGAAA	qPCR primer
qPCR_h_NANOG_rv	ATGGAGGAGGGAAGAGGAGA	qPCR primer
qPCR_h_OCT4_fw	GTGGAGGAAGCTGACAACAA	qPCR primer
qPCR_h_OCT4_rv	GGTTCTCGATACTGGTTCGC	qPCR primer
qPCR_h_GAPDH_fw	CTCTGCTCCTCCTGTTCGAC	qPCR primer
qPCR_h_GAPDH_rv	TTAAAAGCAGCCCTGGTGAC	qPCR primer
SP (RSV) AP2 (hTFAP2A)-CRISPR RES-fw	ccgcgcggttaCCCCAGCTGGGCACTGTAG	site directed mutagenesis primer to confer CRISPR resistance
SP (RSV) AP2 (hTFAP2A)-CRISPR RES-rv	tgccattgctggTGCCGTCGTGACGGTCCT	site directed mutagenesis primer to confer CRISPR resistance
Clo-dTOPO-hTFAP2A-CRISPR Res-fw v2	caccGCCACCatggtttggaaattgacggataatatcaag	forward cloning primer to generate pENTR-dTOPO-hTFAP2A(CR)-HA
Clo-dTOPO-hTFAP2A-CRISPR Res-rv v2	tcaCGCATAGTCAGGAACATCGTATGGGTAGCTGCCGCTGCCctttctgtgcttctcctctttgtcac	reverse cloning primer to generate pENTR-dTOPO-hTFAP2A(CR)-HA

## Sheet: C - plasmid constructs
Plasmid name	Vector	Description
pBACON-puro-empty	pPB	All in one piggyBac vector for sub-cloning gRNAs of interest to knockout proteins in hESC, puromycin was used for selecting transfected cells
pBACON-puro-hGATA3	pBACON-puro-empty	All in one piggyBac vector with gRNA targeting human GATA3 gene to knockout GATA3 in hESCs
pBACON-puro-hTFAP2A	pBACON-puro-empty	All in one piggyBac vector with gRNA targeting human TFAP2A gene to knockout TFAP2A in hESCs
pCAG-ePiggyBac Transposase		Ali H. Brivanlou, Rockefeller
pPBCAG-GFP		Joseph Loturco, UCONN
PB-TA-ERN		Knut Woltjen, Addgene, #80474
SP (RSV) AP-2		Robert Tjian, UC Berkley, Addgene#12100
SP (RSV) AP-2(CR)		TFAP2A gRNA targeted site editted to confer CRISPR resistance
pENTR-dTOPO-hTFAP2A(CR)-HA	pENTR-dTOPO	CRISPR resistant human TFAP2A tagged with HA in pENTR-dTOPO entry vector
PB-TA-ERN-hTFAP2A(CR)-HA	PB-TA-ERN	CRISPR resistant human TFAP2A tagged with HA in an doxycycline inducible vector based on piggyBac
